# Supplementary material for: Groundwater use for irrigation – a global inventory
Source: Copernicus journal article supplement (doi:10.5194/hess-14-1863-2010), 2010-10-12
Supplement: Supplementary file 2 [file HESS_2010_159_Supplement_S2.xls]

## Sheet: Supplement S2 (country)
Supplement S2 (a): Area equipped for irrigation, area actually irrigated and consumptive water use for irrigation from groundwater, surface water and non-conventional sources by country
Please note: the data shown in this table were taken from different sources (census statistics, model simulations, own calculations) as described in Supplement S1.
COUNTRY	CONTINENT	REGION	SUBREGION	SN_UNITS	AEI (ha)	AEI_GW (ha)	AEI_SW (ha)	AEI_NC (ha)	AAI (ha)	AAI_GW (ha)	AAI_SW (ha)	AAI_NC (ha)	ICU (m3 yr-1)	ICU_GW (m3 yr-1)	ICU_SW (m3 yr-1)	ICU_NC (m3 yr-1)
Afghanistan	Asia	Central Asia	Central Asia	27	3.19767e+06	575212	2.62246e+06	0	1.73178e+06	282337	1.44945e+06	0	9579026499	1.77409e+09	7.80493e+09	0
Albania	Europe	Western and Central Europe	Mediterranean Europe	1	188450	1000	187450	0	102670	1000	101670	0	4.22855e+08	4.11858e+06	4.18736e+08	0
Algeria	Africa	Northern Africa	Northern Africa	5	569418	362068	195350	12000	455534	289655	156280	9600	3.77707e+09	2.48369e+09	1.21941e+09	7.396e+07
Andorra	Europe	Western and Central Europe	Western Europe	1	150	37.5	112.5	0	150	37.5	112.5	0	272853	68213.3	204640	0
Angola	Africa	Sub-Saharan Africa	Central Africa	1	80000	16000	64000	0	35000	7000	28000	0	2.12525e+08	4.25051e+07	1.7002e+08	0
Antigua and Barbuda	America	Central America and Caribbean	Caribbean - Lesser Antilles	1	130	19.5	110.5	0	130	19.5	110.5	0	86752.2	13012.8	73739.4	0
Argentina	America	Southern America	Southern America	506	1.76778e+06	380246	1.38754e+06	0	1.35238e+06	323415	1.02896e+06	0	5.80968e+09	1.10938e+09	4.7003e+09	0
Armenia	Asia	Middle East	Caucasus	1	273530	50877	222653	0	176000	32736	143264	0	6.05695e+08	1.12659e+08	4.93036e+08	0
Australia	Oceania	Australia and New Zealand	Australia and New Zealand	249	3.34345e+06	753998	2.52189e+06	67558.8	2541079	537030	1.95544e+06	48612.2	1.49502e+10	2.99585e+09	1.17e+10	2.54373e+08
Austria	Europe	Western and Central Europe	Western Europe	3	90420	74737.1	15682.9	0	34230	28480.8	5749.15	0	3.22309e+07	2.70725e+07	5.15837e+06	0
Azerbaijan	Asia	Middle East	Caucasus	1	1426000	96700	1329300	0	1100000	74593.3	1.02541e+06	0	5732549298	3.88736e+08	5.34381e+09	0
Bahrain	Asia	Middle East	Arabian Peninsula	1	4015	3626	0	389	4015	3626	0	389	5.0549e+07	4.56515e+07	0	4.89753e+06
Bangladesh	Asia	Southern and Eastern Asia	South Asia	23	4695520	3.45859e+06	1.23693e+06	0	4695520	3.45859e+06	1.23693e+06	0	2.35862e+10	1.79365e+10	5.64969e+09	0
Barbados	America	Central America and Caribbean	Caribbean - Lesser Antilles	1	1000	900	100	0	1000	900	100	0	1.69186e+06	1.52267e+06	169186	0
Belarus	Europe	Eastern Europe	Eastern Europe	1	115000	17250	97750	0	25900	3885	22015	0	3.45502e+07	5.18253e+06	2.93677e+07	0
Belgium	Europe	Western and Central Europe	Western Europe	2	21810	12767.2	9042.82	0	1850	1074.78	775.22	0	1.47462e+06	870442	604179	0
Belize	America	Central America and Caribbean	Central America	6	3548.3	792.3	2756	0	3548.3	792.3	2756	0	5.97693e+06	1.19783e+06	4.7791e+06	0
Benin	Africa	Sub-Saharan Africa	Gulf of Guinea	1	12258	2190	10068	0	7131	1274.02	5856.98	0	3.35641e+07	5.99653e+06	2.75675e+07	0
Bhutan	Asia	Southern and Eastern Asia	South Asia	1	38734	0	38734	0	36584	0	36584	0	5.75063e+07	0	5.75063e+07	0
Bolivia (Plurinational State of)	America	Southern America	Andean	1	128240	8977	119263	0	128240	8977	119263	0	4.20161e+08	2.9412e+07	3.90749e+08	0
Bosnia and Herzegovina	Europe	Western and Central Europe	Central Europe	1	4630	1389	3241	0	4630	1389	3241	0	1.8518e+07	5.55541e+06	1.29626e+07	0
Botswana	Africa	Sub-Saharan Africa	Southern Africa	1	1439	663.36	775.64	0	621	286.27	334.73	0	4.20164e+06	1.93688e+06	2.26476e+06	0
Brazil	America	Southern America	Brazil	4979	3149217	591439	2.55778e+06	0	3149217	591439	2.55778e+06	0	9.57578e+09	2.15402e+09	7.42176e+09	0
Brunei Darussalam	Asia	Southern and Eastern Asia	Maritime Southeast Asia	1	1000	0	1000	0	1000	0	1000	0	570500	0	570500	0
Bulgaria	Europe	Western and Central Europe	Central Europe	6	124480	27704.6	96775.4	0	79370	17950.4	61419.6	0	2.19996e+08	4.90165e+07	1.7098e+08	0
Burkina Faso	Africa	Sub-Saharan Africa	Sudano-Sahelian	1	25000	3000	22000	0	25000	3000	22000	0	1.56505e+08	1.87805e+07	1.37724e+08	0
Burundi	Africa	Sub-Saharan Africa	Eastern Africa	1	21430	0	21430	0	21430	0	21430	0	7.35037e+07	0	7.35037e+07	0
Cambodia	Asia	Southern and Eastern Asia	Mainland Southeast Asia	1	269461	0	269461	0	241823	0	241823	0	9.26971e+08	0	9.26971e+08	0
Cameroon	Africa	Sub-Saharan Africa	Central Africa	1	25654	1000	24654	0	25654	1000	24654	0	202345360	7.88748e+06	1.94458e+08	0
Canada	America	Northern America	Northern America	21	1123873	81395	1.04248e+06	0	915745	78551	837194	0	3.42465e+09	1.74431e+08	3.25022e+09	0
Cape Verde	Africa	Sub-Saharan Africa	Sudano-Sahelian	1	2780	391	2389	0	1821	256.12	1564.88	0	7.65227e+06	1.07628e+06	6.57599e+06	0
Central African Republic	Africa	Sub-Saharan Africa	Central Africa	1	135	0	135	0	69	0	69	0	119459	0	119459	0
Chad	Africa	Sub-Saharan Africa	Sudano-Sahelian	1	30273	6000	24273	0	26200	5192.75	21007.2	0	171221408	3.39355e+07	1.37286e+08	0
Chile	America	Southern America	Southern America	327	1.9364e+06	58900	1.8775e+06	0	1.08438e+06	58900	1.02548e+06	0	4.08706e+09	2.79255e+08	3.8078e+09	0
China	Asia	Southern and Eastern Asia	East Asia	56	6.23924e+07	1.8795e+07	4.35974e+07	0	5.32514e+07	1.58473e+07	3.74041e+07	0	1.63014e+11	5.70005e+10	1.06013e+11	0
Colombia	America	Southern America	Andean	1	900000	45000	855000	0	900000	45000	855000	0	1.37268e+09	6.86341e+07	1.30405e+09	0
Comoros	Africa	Sub-Saharan Africa	Indian Ocean Islands	1	130	5	125	0	85	3.27	81.73	0	219977	8462.65	211514	0
Congo	Africa	Sub-Saharan Africa	Central Africa	1	2000	0	2000	0	220	0	220	0	490026	0	490026	0
Cook Islands	Oceania	Other Pacific Islands	Other Pacific Islands	1	0	0	0	0	0	0	0	0	0	0	0	0
Costa Rica	America	Central America and Caribbean	Central America	1	103084	17524.3	85559.7	0	103084	17524.3	85559.7	0	435271360	7.39961e+07	3.61275e+08	0
Cote d'Ivoire	Africa	Sub-Saharan Africa	Gulf of Guinea	1	72750	0	72750	0	66930	0	66930	0	2.23993e+08	0	2.23993e+08	0
Croatia	Europe	Western and Central Europe	Central Europe	21	9267.14	3412.56	5854.58	0	9267.14	3412.56	5854.58	0	1.69706e+07	5.42973e+06	1.15409e+07	0
Cuba	America	Central America and Caribbean	Caribbean - Greater Antilles	1	870319	392742	477577	0	180900	81633.3	99266.7	0	3.53655e+08	1.59591e+08	1.94064e+08	0
Cyprus	Europe	Western and Central Europe	Mediterranean Europe	1	55458	32322.4	22608.4	527.2	45937	27402.4	18019.4	515.2	3.40865e+08	2.03333e+08	1.33709e+08	3.82293e+06
Czech Republic	Europe	Western and Central Europe	Central Europe	8	50590	3337.28	47252.7	0	16870	1155.81	15714.2	0	2.21577e+07	1.4053e+06	2.07524e+07	0
Democratic People's Republic of Korea	Asia	Southern and Eastern Asia	East Asia	1	1460000	200000	1260000	0	1460000	200000	1260000	0	1.25915e+09	1.72487e+08	1.08667e+09	0
Democratic Republic of the Congo	Africa	Sub-Saharan Africa	Central Africa	1	10500	0	10500	0	6800	0	6800	0	16669012	0	16669012	0
Denmark	Europe	Western and Central Europe	Northern Europe	1	448820	448820	0	0	201480	201480	0	0	4.70465e+07	4.70465e+07	0	0
Djibouti	Africa	Sub-Saharan Africa	Sudano-Sahelian	1	1012	1012	0	0	388	388	0	0	2.53203e+06	2.53203e+06	0	0
Dominica	America	Central America and Caribbean	Caribbean - Lesser Antilles	1	0	0	0	0	0	0	0	0	0	0	0	0
Dominican Republic	America	Central America and Caribbean	Caribbean - Greater Antilles	1	306485	67426.7	239058	0	257747	56704.3	201043	0	1.05841e+09	2.32849e+08	8.25557e+08	0
Ecuador	America	Southern America	Andean	25	853332	105120	748212	0	616655	73270.9	543384	0	2.40279e+09	3.09123e+08	2.09367e+09	0
Egypt	Africa	Northern Africa	Northern Africa	27	3422178	331927	3.09025e+06	0	3422178	331927	3.09025e+06	0	4.69069e+10	4.37145e+09	4.25355e+10	0
El Salvador	America	Central America and Caribbean	Central America	14	45026.5	3086.3	41940.2	0	45026.5	3086.3	41940.2	0	2.10073e+08	1.54664e+07	1.94607e+08	0
Equatorial Guinea	Africa	Sub-Saharan Africa	Central Africa	1	0	0	0	0	0	0	0	0	0	0	0	0
Eritrea	Africa	Sub-Saharan Africa	Sudano-Sahelian	1	68770	16229	52541	0	42637.4	10062	32575.4	0	2.8162e+08	6.64594e+07	2.15161e+08	0
Estonia	Europe	Eastern Europe	Eastern Europe	1	1362.7	0	1362.7	0	600	0	600	0	424860	0	424860	0
Ethiopia	Africa	Sub-Saharan Africa	Eastern Africa	11	290729	2610.91	288118	0	290729	2610.91	288118	0	1.20045e+09	1.12803e+07	1.18917e+09	0
Falkland Islands (Malvinas)	America	Southern America	Southern America	1	0	0	0	0	0	0	0	0	0	0	0	0
Faroe Islands	Europe	Western and Central Europe	Northern Europe	1	0	0	0	0	0	0	0	0	0	0	0	0
Fiji	Oceania	Other Pacific Islands	Other Pacific Islands	1	4000	400	3600	0	4000	400	3600	0	330441	33044.1	297397	0
Finland	Europe	Western and Central Europe	Northern Europe	1	88010	13201.5	74808.5	0	15000	2250	12750	0	7.2372e+06	1.08558e+06	6.15162e+06	0
France	Europe	Western and Central Europe	Western Europe	22	2695660	1.21354e+06	1.48212e+06	0	1915260	854248	1.06101e+06	0	3.87711e+09	1.56637e+09	2.31074e+09	0
French Guiana (France)	America	Southern America	Guyana	1	6034	301.7	5732.3	0	5724	286.2	5437.8	0	8.09718e+06	404859	7.69232e+06	0
Gabon	Africa	Sub-Saharan Africa	Central Africa	1	4450	0	4450	0	4450	0	4450	0	12344232	0	12344232	0
Gambia	Africa	Sub-Saharan Africa	Sudano-Sahelian	1	2149	15	2134	0	1400	9.77	1390.23	0	10176422	71016.9	1.01054e+07	0
Georgia	Asia	Middle East	Caucasus	1	432790	0	432790	0	126060	0	126060	0	3.58035e+08	0	3.58035e+08	0
Germany	Europe	Western and Central Europe	Western Europe	122	515731	423479	92252	0	234594	184796	49798	0	2.00376e+08	1.52764e+08	4.76124e+07	0
Ghana	Africa	Sub-Saharan Africa	Gulf of Guinea	1	59000	12000	45800	1200	55910	12000	42710	1200	1.71555e+08	3.6821e+07	1.31052e+08	3.6821e+06
Greece	Europe	Western and Central Europe	Mediterranean Europe	13	1521590	735365	786225	0	1294390	622765	671625	0	7.13506e+09	3.60495e+09	3.53011e+09	0
Grenada	America	Central America and Caribbean	Caribbean - Lesser Antilles	1	219	0	219	0	219	0	219	0	387028	0	387028	0
Guadeloupe (France)	America	Central America and Caribbean	Caribbean - Lesser Antilles	1	7780	778	7002	0	2710	271	2439	0	2.41954e+06	241954	2.17759e+06	0
Guam (USA)	Oceania	Other Pacific Islands	Other Pacific Islands	1	312.42	249.94	62.48	0	312.42	249.94	62.48	0	0	0	0	0
Guatemala	America	Central America and Caribbean	Central America	22	142499	31010.9	111488	0	142499	31010.9	111488	0	7.17878e+08	1.55043e+08	5.62835e+08	0
Guinea	Africa	Sub-Saharan Africa	Gulf of Guinea	1	94914	460	94454	0	94914	460	94454	0	3.26248e+08	1.58116e+06	3.24667e+08	0
Guinea Bissau	Africa	Sub-Saharan Africa	Gulf of Guinea	1	22558	4892	17666	0	22558	4892	17666	0	1.40986e+08	3.05748e+07	1.10412e+08	0
Guyana	America	Southern America	Guyana	1	150134	0	150134	0	150134	0	150134	0	328673248	0	328673248	0
Haiti	America	Central America and Caribbean	Caribbean - Greater Antilles	1	91502	13725	77777	0	65424	9813.39	55610.6	0	2.28502e+08	3.42746e+07	1.94228e+08	0
Holy See	Europe	Western and Central Europe	Mediterranean Europe	1	0	0	0	0	0	0	0	0	0	0	0	0
Honduras	America	Central America and Caribbean	Central America	18	81631.1	6264.3	75366.8	0	61326.4	4706.13	56620.3	0	3.43569e+08	2.97211e+07	3.13848e+08	0
Hungary	Europe	Western and Central Europe	Central Europe	7	242170	54716.7	187453	0	148680	32781.8	115898	0	3.1242e+08	6.78788e+07	2.44541e+08	0
Iceland	Europe	Western and Central Europe	Northern Europe	1	0	0	0	0	0	0	0	0	0	0	0	0
India	Asia	Southern and Eastern Asia	South Asia	581	61907846	3.94259e+07	2.2482e+07	0	58129630	3.68498e+07	2.12798e+07	0	3.16935e+11	2.04347e+11	1.12587e+11	0
Indonesia	Asia	Southern and Eastern Asia	Maritime Southeast Asia	1	6039057	60295	5978762	0	6039057	60295	5978762	0	1.84451e+10	1.84159e+08	1.8261e+10	0
Iran (Islamic Republic of)	Asia	Middle East	Islamic Republic of Iran	8	8297031	5.15119e+06	3.14584e+06	0	6.42334e+06	3.98791e+06	2.43543e+06	0	4.70386e+10	3.01526e+10	1.6886e+10	0
Iraq	Asia	Middle East	Near East	1	3525000	220000	3305000	0	2428000	146200	2281800	0	20810950656	1.25311e+09	1.95578e+10	0
Ireland	Europe	Western and Central Europe	Western Europe	1	1100	220	880	0	1100	220	880	0	455047	91009.4	364038	0
Israel	Asia	Middle East	Near East	1	225000	110250	74250	40500	181570	88969.3	59918.1	32682.6	1.68475e+09	8.25529e+08	5.55968e+08	3.03255e+08
Italy	Europe	Western and Central Europe	Mediterranean Europe	20	3977380	1.32781e+06	2.64957e+06	0	2732730	893565	1.83917e+06	0	7.24839e+09	2.88542e+09	4.36297e+09	0
Jamaica	America	Central America and Caribbean	Caribbean - Greater Antilles	1	26444	23799.6	2644.4	0	26444	23799.6	2644.4	0	5.83507e+07	5.25156e+07	5.83507e+06	0
Japan	Asia	Southern and Eastern Asia	East Asia	1	2800000	250000	2550000	0	2600000	232143	2.36786e+06	0	1.98847e+09	1.77542e+08	1.81093e+09	0
Jordan	Asia	Middle East	Near East	12	83450	44479	38971	0	76200.2	40614.9	35585.4	0	8.72406e+08	4.9803e+08	3.74376e+08	0
Kazakhstan	Asia	Central Asia	Central Asia	1	3556400	179000	3332300	45100	2241300	110980	2101494	28826	1.11631e+10	5.5275e+08	1.04668e+10	1.43572e+08
Kenya	Africa	Sub-Saharan Africa	Eastern Africa	1	103203	1032	102171	0	97011	970.1	96040.9	0	5.79145e+08	5.79139e+06	5.73354e+08	0
Kiribati	Oceania	Other Pacific Islands	Other Pacific Islands	1	0	0	0	0	0	0	0	0	0	0	0	0
Kuwait	Asia	Middle East	Arabian Peninsula	1	7050	4300.5	0	2749.5	7050	4300.5	0	2749.5	7.36005e+07	4.48963e+07	0	2.87042e+07
Kyrgyzstan	Asia	Central Asia	Central Asia	1	1077100	7000	1070100	0	1077100	7000	1070100	0	3.10371e+09	2.01708e+07	3.08354e+09	0
Lao People's Democratic Republic	Asia	Southern and Eastern Asia	Mainland Southeast Asia	1	310000	200	309800	0	271703	200	271503	0	1.37445e+09	1.01173e+06	1.37344e+09	0
Latvia	Europe	Eastern Europe	Eastern Europe	1	790	0	790	0	0	0	0	0	0	0	0	0
Lebanon	Asia	Middle East	Near East	25	104010	54070	49939.6	0	90000	46787	43213	0	8.37759e+08	4.49132e+08	3.88627e+08	0
Lesotho	Africa	Sub-Saharan Africa	Southern Africa	1	2638	50	2588	0	67	50	17	0	293912	219337	74574.7	0
Liberia	Africa	Sub-Saharan Africa	Gulf of Guinea	1	2100	10.5	2089.5	0	2100	10.5	2089.5	0	2.96438e+06	14821.9	2.94956e+06	0
Libyan Arab Jamahiriya	Africa	Northern Africa	Northern Africa	2	470000	464000	3000	3000	316000	311966	2017.02	2017.02	2.71341e+09	2.68327e+09	1.50717e+07	1.50717e+07
Liechtenstein	Europe	Western and Central Europe	Western Europe	1	0	0	0	0	0	0	0	0	0	0	0	0
Lithuania	Europe	Eastern Europe	Eastern Europe	1	1340	987.37	352.63	0	1000	736.84	263.16	0	721608	531710	189898	0
Luxembourg	Europe	Western and Central Europe	Western Europe	1	27	18.9	8.1	0	27	18.9	8.1	0	15651.9	10956.4	4695.58	0
Madagascar	Africa	Sub-Saharan Africa	Indian Ocean Islands	1	1086291	0	1086291	0	1080691	0	1080691	0	2794990080	0	2794990080	0
Malawi	Africa	Sub-Saharan Africa	Southern Africa	1	56390	30	56360	0	54134	30	54104	0	341497088	189251	3.41308e+08	0
Malaysia	Asia	Southern and Eastern Asia	Maritime Southeast Asia	1	362600	29008	333592	0	362600	29008	333592	0	613548288	4.90839e+07	5.64464e+08	0
Maldives	Asia	Southern and Eastern Asia	South Asia	1	0	0	0	0	0	0	0	0	0	0	0	0
Mali	Africa	Sub-Saharan Africa	Sudano-Sahelian	1	235791	1000	234791	0	176843	750	176093	0	1367571584	5.79993e+06	1.36177e+09	0
Malta	Europe	Western and Central Europe	Mediterranean Europe	1	2300	2287.15	12.85	0	2130	2118.1	11.9	0	14280182	1.42004e+07	79781.3	0
Martinique (France)	America	Central America and Caribbean	Caribbean - Lesser Antilles	1	6380	319	6061	0	4997	249.85	4747.15	0	9.58579e+06	479290	9.10651e+06	0
Mauritania	Africa	Sub-Saharan Africa	Sudano-Sahelian	13	45012	4751	40261	0	22840	2410.75	20429.2	0	2.02393e+08	3.63503e+07	1.66043e+08	0
Mauritius	Africa	Sub-Saharan Africa	Indian Ocean Islands	1	21222	5306	15916	0	20800	5200.49	15599.5	0	78012496	1.9505e+07	5.85075e+07	0
Mexico	America	Northern America	Mexico	2463	6.4188e+06	2.48978e+06	3.92902e+06	0	5.64855e+06	2.19101e+06	3.45754e+06	0	2.71632e+10	1.13863e+10	1.5777e+10	0
Micronesia (Federated States of)	Oceania	Other Pacific Islands	Other Pacific Islands	1	0	0	0	0	0	0	0	0	0	0	0	0
Monaco	Europe	Western and Central Europe	Mediterranean Europe	1	0	0	0	0	0	0	0	0	0	0	0	0
Mongolia	Asia	Southern and Eastern Asia	East Asia	1	84300	36000	48300	0	62900	22617	40283	0	3.26161e+08	1.17278e+08	2.08883e+08	0
Montenegro	Europe	Western and Central Europe	Central Europe	1	2210	2202	8	0	2210	2202	8	0	5.1125e+06	5.09399e+06	18506.8	0
Morocco	Africa	Northern Africa	Northern Africa	16	1484160	677201	804221	2738	1.44801e+06	660707	784633	2671.33	9.26858e+09	4.4837e+09	4.76546e+09	1.94166e+07
Mozambique	Africa	Sub-Saharan Africa	Southern Africa	1	118120	639	117481	0	40063	216.73	39846.3	0	1.64229e+08	888434	1.6334e+08	0
Myanmar	Asia	Southern and Eastern Asia	Mainland Southeast Asia	1	2073000	100000	1973000	0	2073000	100000	1973000	0	6.65554e+09	3.21058e+08	6.33448e+09	0
Namibia	Africa	Sub-Saharan Africa	Southern Africa	23	7573	1632.35	5940.65	0	7573	1632.35	5940.65	0	7.96721e+07	1.44722e+07	6.51999e+07	0
Nauru	Oceania	Other Pacific Islands	Other Pacific Islands	1	0	0	0	0	0	0	0	0	0	0	0	0
Nepal	Asia	Southern and Eastern Asia	South Asia	75	1.16835e+06	229327	939021	0	1.16835e+06	229327	939021	0	4.41622e+09	9.01106e+08	3.51512e+09	0
Netherlands	Europe	Western and Central Europe	Western Europe	4	476315	275899	200416	0	62190	36088.6	26101.4	0	5.21232e+07	2.85148e+07	2.36084e+07	0
New Zealand	Oceania	Australia and New Zealand	Australia and New Zealand	16	619293	195174	424119	0	508733	156144	352589	0	9.29608e+08	3.0555e+08	6.24058e+08	0
Nicaragua	America	Central America and Caribbean	Central America	1	133673	93571.1	40101.9	0	111373	77961.1	33411.9	0	6.46707e+08	4.52695e+08	1.94012e+08	0
Niger	Africa	Sub-Saharan Africa	Sudano-Sahelian	1	73663	1370.87	72292.1	0	65615	1221.1	64393.9	0	634282304	1.1804e+07	6.22478e+08	0
Nigeria	Africa	Sub-Saharan Africa	Gulf of Guinea	1	293117	66800	226317	0	218840	64000	154840	0	1.19727e+09	3.50143e+08	8.47128e+08	0
Niue	Oceania	Other Pacific Islands	Other Pacific Islands	1	0	0	0	0	0	0	0	0	0	0	0	0
Northern Mariana Islands (USA)	Oceania	Other Pacific Islands	Other Pacific Islands	4	125.46	98.73	26.73	0	125.46	98.73	26.73	0	0	0	0	0
Norway	Europe	Western and Central Europe	Northern Europe	21	134396	8334.31	126062	0	43370	2505.18	40864.8	0	1.68022e+07	957358	1.58448e+07	0
Occupied Palestinian Territory	Asia	Middle East	Near East	1	24000	24000	0	0	24000	24000	0	0	2.22067e+08	2.22067e+08	0	0
Oman	Asia	Middle East	Arabian Peninsula	1	58850	58850	0	0	58850	58850	0	0	8.52226e+08	8.52226e+08	0	0
Pakistan	Asia	Southern and Eastern Asia	South Asia	112	16725843	5.17255e+06	1.15533e+07	0	13378476	4.83721e+06	8.54127e+06	0	1.16786e+11	3.86411e+10	7.81449e+10	0
Palau	Oceania	Other Pacific Islands	Other Pacific Islands	1	0	0	0	0	0	0	0	0	0	0	0	0
Panama	America	Central America and Caribbean	Central America	2	34114.7	1393.15	32721.5	0	27475	1122	26353	0	5.33277e+07	1.75e+06	5.15777e+07	0
Papua New Guinea	Asia	Southern and Eastern Asia	Maritime Southeast Asia	1	0	0	0	0	0	0	0	0	0	0	0	0
Paraguay	America	Southern America	Southern America	1	67000	6700	60300	0	67000	6700	60300	0	1.10172e+08	1.10172e+07	9.91548e+07	0
Peru	America	Southern America	Andean	193	1.72907e+06	489950	1.23912e+06	0	1.50359e+06	426055	1.07754e+06	0	8.10108e+09	2.18474e+09	5.91634e+09	0
Philippines	Asia	Southern and Eastern Asia	Maritime Southeast Asia	80	1879084	254039	1625045	0	1879084	254039	1625045	0	4.34981e+09	5.21331e+08	3.82848e+09	0
Poland	Europe	Western and Central Europe	Central Europe	1	115710	11571	104139	0	72060	7206	64854	0	8.45401e+07	8.45401e+06	7.60861e+07	0
Portugal	Europe	Western and Central Europe	Mediterranean Europe	7	674800	371194	303606	0	248030	136183	111847	0	1.33964e+09	7.30719e+08	6.08921e+08	0
Puerto Rico (USA)	America	Central America and Caribbean	Caribbean - Greater Antilles	79	37357.3	29577.2	7780.12	0	17072.5	14894.4	2178.14	0	4.43623e+07	3.96985e+07	4.66378e+06	0
Qatar	Asia	Middle East	Arabian Peninsula	1	12935	12081	0	854	6322	5904.61	0	417.39	8.58582e+07	8.01897e+07	0	5.66852e+06
Republic of Korea	Asia	Southern and Eastern Asia	East Asia	1	888795	49639	839156	0	888795	49639	839156	0	8.45931e+08	4.7245e+07	7.98686e+08	0
Republic of Moldova	Europe	Eastern Europe	Eastern Europe	1	228300	0	228300	0	10000	0	10000	0	3.21237e+07	0	3.21237e+07	0
Reunion (France)	Africa	Sub-Saharan Africa	Indian Ocean Islands	1	12000	2400	9600	0	7471	1618.72	5852.28	0	7.75279e+06	1.67977e+06	6.07301e+06	0
Romania	Europe	Western and Central Europe	Central Europe	8	1510830	166065	1.34477e+06	0	400520	34283.6	366236	0	9.08087e+08	7.4782e+07	8.33305e+08	0
Russian Federation	Europe	Eastern Europe	Russian Federation	1	2375100	475020	1900080	0	939200	338112	601088	0	2.37688e+09	8.55676e+08	1.5212e+09	0
Rwanda	Africa	Sub-Saharan Africa	Eastern Africa	1	8500	85	8415	0	8500	85	8415	0	1.79285e+07	179285	1.77492e+07	0
Saint Kitts and Nevis	America	Central America and Caribbean	Caribbean - Lesser Antilles	1	18	9	9	0	18	9	9	0	10651.8	5325.92	5325.92	0
Saint Lucia	America	Central America and Caribbean	Caribbean - Lesser Antilles	1	297	0	297	0	297	0	297	0	533200	0	533200	0
Saint Vincent and the Grenadines	America	Central America and Caribbean	Caribbean - Lesser Antilles	1	0	0	0	0	0	0	0	0	0	0	0	0
Samoa	Oceania	Other Pacific Islands	Other Pacific Islands	1	0	0	0	0	0	0	0	0	0	0	0	0
San Marino	Europe	Western and Central Europe	Mediterranean Europe	1	0	0	0	0	0	0	0	0	0	0	0	0
Sao Tome and Principe	Africa	Sub-Saharan Africa	Central Africa	1	9700	0	9700	0	9700	0	9700	0	1.94416e+07	0	1.94416e+07	0
Saudi Arabia	Asia	Middle East	Arabian Peninsula	1	1730767	1678867	0	51900	1191351	1.15563e+06	0	35724.7	12439928832	1.20669e+10	0	3.73032e+08
Senegal	Africa	Sub-Saharan Africa	Sudano-Sahelian	1	119680	10218	109462	0	69000	6900	62100	0	611853824	6.11854e+07	5.50668e+08	0
Serbia	Europe	Western and Central Europe	Central Europe	4	134379	13283.2	121096	0	69400	9458.55	59941.4	0	2.0464e+08	3.09934e+07	1.73647e+08	0
Seychelles	Africa	Sub-Saharan Africa	Indian Ocean Islands	1	260	0	260	0	200	0	200	0	440878	0	440878	0
Sierra Leone	Africa	Sub-Saharan Africa	Gulf of Guinea	1	29360	146.8	29213.2	0	10000	146.8	9853.2	0	5.58157e+07	819374	5.49963e+07	0
Singapore	Asia	Southern and Eastern Asia	Maritime Southeast Asia	1	0	0	0	0	0	0	0	0	0	0	0	0
Slovakia	Europe	Western and Central Europe	Central Europe	4	209060	16698.8	192361	0	104550	8192.69	96357.3	0	1.92444e+08	1.49883e+07	1.77456e+08	0
Slovenia	Europe	Western and Central Europe	Central Europe	1	15643	1668.59	13974.4	0	1880	200.53	1679.47	0	1.21761e+06	129876	1.08773e+06	0
Solomon Islands	Oceania	Other Pacific Islands	Other Pacific Islands	1	0	0	0	0	0	0	0	0	0	0	0	0
Somalia	Africa	Sub-Saharan Africa	Sudano-Sahelian	2	200000	10000	190000	0	65000	10000	55000	0	3.28677e+08	7.5715e+07	2.52962e+08	0
South Africa	Africa	Sub-Saharan Africa	Southern Africa	1	1498000	127330	1370670	0	1498000	127330	1370670	0	8738493440	7.42772e+08	7.99572e+09	0
Spain	Europe	Western and Central Europe	Mediterranean Europe	19	3828120	1.44536e+06	2.38276e+06	0	3437350	1.27556e+06	2.16179e+06	0	1.96272e+10	7.71346e+09	1.19137e+10	0
Sri Lanka	Asia	Southern and Eastern Asia	South Asia	26	570000	6828.28	563172	0	570000	6828.28	563172	0	2.23266e+09	2.63566e+07	2.2063e+09	0
Sudan	Africa	Sub-Saharan Africa	Sudano-Sahelian	1	1863000	69239	1793761	0	800000	29732.3	770268	0	9.18351e+09	3.41308e+08	8.8422e+09	0
Suriname	America	Southern America	Guyana	1	51180	0	51180	0	51180	0	51180	0	9.40158e+07	0	9.40158e+07	0
Swaziland	Africa	Sub-Saharan Africa	Southern Africa	1	49843	1000	48843	0	44859	900	43959	0	2.61176e+08	5.23993e+06	2.55936e+08	0
Sweden	Europe	Western and Central Europe	Northern Europe	8	188470	50571	137899	0	53430	18231.9	35198.1	0	4.81461e+07	1.69806e+07	3.11655e+07	0
Switzerland	Europe	Western and Central Europe	Western Europe	1	55000	12100	42900	0	45000	9900	35100	0	3.52864e+06	776301	2.75234e+06	0
Syrian Arab Republic	Asia	Middle East	Near East	13	1396400	950308	446092	0	1396400	950308	446092	0	1.04726e+10	7.21042e+09	3.26218e+09	0
Tajikistan	Asia	Central Asia	Central Asia	1	719200	68000	626200	25000	699077	66097.4	608679	24300.5	3.59412e+09	3.39822e+08	3.12936e+09	1.24935e+08
Thailand	Asia	Southern and Eastern Asia	Mainland Southeast Asia	76	5279860	481063	4.7988e+06	0	5279860	481063	4.7988e+06	0	2.03377e+10	2.12632e+09	1.82114e+10	0
The former Yugoslav Republic of Macedonia	Europe	Western and Central Europe	Mediterranean Europe	1	127800	5000	122800	0	79637.9	5000	74637.9	0	3.57758e+08	2.24615e+07	3.35297e+08	0
Timor-Leste	Asia	Southern and Eastern Asia	Maritime Southeast Asia	1	28907	578.14	28328.9	0	13154	263.08	12890.9	0	1.97999e+07	395998	1.94039e+07	0
Togo	Africa	Sub-Saharan Africa	Gulf of Guinea	1	7300	46	7254	0	6278	46	6232	0	3.00731e+07	220351	2.98528e+07	0
Tonga	Oceania	Other Pacific Islands	Other Pacific Islands	1	0	0	0	0	0	0	0	0	0	0	0	0
Trinidad and Tobago	America	Central America and Caribbean	Caribbean - Lesser Antilles	1	3600	360	3240	0	3060	306	2754	0	8.32428e+06	832428	7.49185e+06	0
Tunisia	Africa	Northern Africa	Northern Africa	3	432070	257000	167045	8025	375901	223590	145329	6981.75	2.69905e+09	1.66329e+09	9.88454e+08	4.73122e+07
Turkey	Asia	Middle East	Near East	81	4983000	1.66911e+06	3.31389e+06	0	3.50575e+06	1.72958e+06	1.77617e+06	0	1.86188e+10	9.39005e+09	9.22875e+09	0
Turkmenistan	Asia	Central Asia	Central Asia	1	1843000	46075	1796925	0	1843000	46075	1796925	0	1.39568e+10	3.4892e+08	1.36079e+10	0
Tuvalu	Oceania	Other Pacific Islands	Other Pacific Islands	1	0	0	0	0	0	0	0	0	0	0	0	0
Uganda	Africa	Sub-Saharan Africa	Eastern Africa	1	9150	91.5	9058.5	0	5900	59	5841	0	2.13152e+07	213152	2.1102e+07	0
Ukraine	Europe	Eastern Europe	Eastern Europe	1	2177000	0	2177000	0	731400	0	731400	0	2.53851e+09	0	2.53851e+09	0
United Arab Emirates	Asia	Middle East	Arabian Peninsula	1	226600	226600	0	0	226600	226600	0	0	3.67259e+09	3.67259e+09	0	0
United Kingdom	Europe	Western and Central Europe	Western Europe	10	242115	100556	141559	0	133405	53039	80366	0	1.42625e+08	5.92708e+07	8.33544e+07	0
United Republic of Tanzania	Africa	Sub-Saharan Africa	Eastern Africa	24	189047	17465.4	171582	0	189047	17465.4	171582	0	1.02962e+09	9.99238e+07	9.29698e+08	0
United States of America	America	Northern America	Northern America	4302	2.79139e+07	1.65762e+07	1.13376e+07	0	2.23661e+07	1.34686e+07	8.89742e+06	0	1.55195e+11	8.83239e+10	6.68708e+10	0
United States Virgin Islands (USA)	America	Central America and Caribbean	Caribbean - Lesser Antilles	2	184.54	163.64	20.9	0	184.54	163.64	20.9	0	360695	324792	35903.6	0
Uruguay	America	Southern America	Southern America	1	243419	19254.9	224164	0	217593	17212	200381	0	5.98642e+08	4.73536e+07	5.51288e+08	0
Uzbekistan	Asia	Central Asia	Central Asia	1	4280600	273958	4.00664e+06	0	4194988	268479	3.92651e+06	0	2.62996e+10	1.68318e+09	2.46164e+10	0
Vanuatu	Oceania	Other Pacific Islands	Other Pacific Islands	1	0	0	0	0	0	0	0	0	0	0	0	0
Venezuela (Bolivarian Republic of)	America	Southern America	Andean	1	570000	11400	558600	0	345123	6902.46	338221	0	1.36738e+09	2.73477e+07	1.34004e+09	0
Viet Nam	Asia	Southern and Eastern Asia	Mainland Southeast Asia	1	4585500	45855	4539645	0	3200000	32000	3168000	0	7.99913e+09	7.99913e+07	7.91914e+09	0
Yemen	Asia	Middle East	Arabian Peninsula	20	751689	483108	253861	14720	727658	483108	229830	14720	6.38421e+09	3.99646e+09	2.27462e+09	1.1313e+08
Zambia	Africa	Sub-Saharan Africa	Southern Africa	4	155912	6646	149266	0	155912	6646	149266	0	1.02914e+09	4.31117e+07	9.86027e+08	0
Zimbabwe	Africa	Sub-Saharan Africa	Southern Africa	1	173513	20000	153513	0	123866	14277.4	109589	0	8.59027e+08	9.90159e+07	7.60011e+08	0
WORLD	WORLD	WORLD	WORLD	15038	3.00895e+08	1.12936e+08	1.87682e+08	276261	2.52579e+08	9.78212e+07	1.54546e+08	211407	1.27693e+12	5.45359e+11	7.30059e+11	1.51483e+09

## Sheet: Supplement S2 (subnational)
Supplement S2 (b): Data, variables and coefficients used to compute AEI, AAI and ICWU from groundwater, surface water and nonconventional sources for each administrative unit used in the inventory
Please note: the data shown in this table were taken from different sources (census statistics, model simulations, own calculations) as described in Supplement S1.
ID	COUNTRY	ADMIN_1	ADMIN_2	ADMIN_3	AREA (ha)	YEAR	FLAG_SRC	AEI (ha)	AEI_GW (ha)	AEI_SW (ha)	AEI_NC (ha)	AAI (ha)	AAI_GW (ha)	AAI_SW (ha)	AAI_NC (ha)	AEI_MIRCA (ha)	AHI_MIRCA (ha)	MMGA_MIRCA (ha)	ICWU_GCWM (m3 yr-1)	cs1	cs1*AHI_MIRCA	cs1*MMGA_MIRCA	cs2	ICWU (m3 yr-1)	ICWU_GW (m3 yr-1)	ICWU_SW (m3 yr-1)	ICWU_NC (m3 yr-1)	AEI_GW_PCT	AEI_GW_FRAC	AEI_SW_PCT	AEI_SW_FRAC
1	Afghanistan	Central	Kabul		471220	1967	1	58079	18875.7	39203.3	0	17510.3	5690.85	11819.5	0	60170.5	26993.9	21281.8	86706288	0.96524	26055.6	20542	0.852416	7.13407e+07	2.31857e+07	4.8155e+07	0	32.5	0.325	67.5	0.675
2	Afghanistan	Central	Kapisa and Parwan		1.14838e+06	1967	1	82554.9	13590.7	68964.2	0	24889.6	4097.48	20792.1	0	80463.3	49882.5	40146.4	151051584	1.02599	51179.2	41190	0.604263	9.36475e+07	1.54168e+07	7.82307e+07	0	16.4626	0.164626	83.5374	0.835374
3	Afghanistan	Central	Lowgar		449736	1967	1	34729.5	6242.18	28487.3	0	10470.6	1881.96	8588.68	0	35694.7	16206.5	12717.2	70171232	0.97296	15768.3	12373.3	0.846226	5.77751e+07	1.03843e+07	4.73908e+07	0	17.9737	0.179737	82.0263	0.820263
4	Afghanistan	Central	Vardak		736030	1967	1	57435.9	23939.1	33496.8	0	17316.4	7217.44	10099	0	57313.7	38659.7	31713.1	132496800	1.00213	38742.2	31780.7	0.544872	7.23479e+07	3.01544e+07	4.21935e+07	0	41.6797	0.416797	58.3203	0.583203
5	Afghanistan	East	Konar		1.02312e+06	1967	1	24580.5	769.46	23811.1	0	19060.2	596.65	18463.5	0	25006.8	21482.4	17859.7	65209964	0.982955	21116.3	17555.3	1	6.40985e+07	2.00651e+06	6.2092e+07	0	3.1304	0.0313036	96.8696	0.968696
6	Afghanistan	East	Laghman		678131	1967	1	23275.4	59.23	23216.2	0	18048.2	45.92	18002.2	0	23352.2	18662.7	15173.8	50164504	0.996713	18601.4	15124	1	4.99996e+07	127214	4.98724e+07	0	0.2545	0.00254474	99.7455	0.997455
7	Afghanistan	East	Nangarha		776995	1967	1	96768.1	31585.6	65182.5	0	75035.7	24492	50543.6	0	96381.4	53896.4	43653.7	226478480	1.00401	54112.7	43828.9	1.38666	3.15308e+08	1.02918e+08	2.1239e+08	0	32.6405	0.326405	67.3595	0.673595
8	Afghanistan	North	Balkh		1.30104e+06	1967	1	240212	267.5	239944	0	88307.5	98.34	88209.2	0	236739	108877	80835.3	476679712	1.01467	110474	82021.1	1	4.83672e+08	538622	4.83134e+08	0	0.1114	0.0011136	99.8886	0.998886
9	Afghanistan	North	Faryab		2.34859e+06	1967	1	137908	5557.16	132351	0	50698.4	2042.94	48655.4	0	137372	71213.9	55550	273841344	1.0039	71491.7	55766.7	0.909115	2.49924e+08	1.0071e+07	2.39854e+08	0	4.0296	0.0402961	95.9704	0.959704
10	Afghanistan	North	Jowzjan		2.4577e+06	1967	1	227544	2687.14	224857	0	83650.6	987.86	82662.8	0	230519	127612	95446.3	472528384	0.987095	125965	94214.5	0.887874	4.14131e+08	4.89062e+06	4.09241e+08	0	1.1809	0.0118093	98.8191	0.988191
11	Afghanistan	North	Samangan		1.67839e+06	1967	1	61167.2	9389.16	51778.1	0	22486.5	3451.68	19034.8	0	58668.6	33756	25920.3	103776456	1.04259	35193.6	27024.3	0.832087	9.00286e+07	1.38194e+07	7.62092e+07	0	15.35	0.1535	84.65	0.8465
12	Afghanistan	Northeast	Badakhshan		4.34481e+06	1967	1	49394.5	3143.14	46251.4	0	54459.5	3465.44	50994	0	51476.1	41679.4	32923.9	56253252	0.959562	39994	31592.5	1.36169	7.35021e+07	4.67719e+06	6.88249e+07	0	6.3633	0.0636334	93.6367	0.936367
13	Afghanistan	Northeast	Baghian		1.55432e+06	1967	1	89808.3	179.21	89629.1	0	99017.3	197.59	98819.7	0	89699.1	55336.3	43968.2	113464112	1.00122	55403.7	44021.8	1.7872	2.0303e+08	405148	2.02624e+08	0	0.1995	0.00199547	99.8005	0.998005
14	Afghanistan	Northeast	Konduz		695167	1967	1	134657	346.94	134310	0	148465	382.51	148082	0	132290	59728.3	47181	203067184	1.01789	60797.2	48025.3	2.44197	5.04758e+08	1.30048e+06	5.03458e+08	0	0.2576	0.00257647	99.7424	0.997424
15	Afghanistan	Northeast	Takhar		1.55153e+06	1967	1	106569	14660.5	91908.1	0	117496	16163.8	101332	0	109135	74871.4	57309.6	186292096	0.976485	73110.8	55962	1.6071	2.9235e+08	4.02182e+07	2.52132e+08	0	13.7569	0.137569	86.2431	0.862431
16	Afghanistan	South	Ghazn		3.22695e+06	1967	1	289286	106294	182992	0	76708.3	28185.4	48523	0	289838	155868	117670	862766656	0.998094	155571	117446	0.653139	5.62432e+08	2.06658e+08	3.55775e+08	0	36.7436	0.367436	63.2564	0.632564
17	Afghanistan	South	Paktia		1.74551e+06	1967	1	118604	22331.7	96272.7	0	31449.7	5921.58	25528.1	0	118567	65049.5	52560.6	325564576	1.00032	65070.1	52577.2	0.598162	1.94802e+08	3.66787e+07	158123112	0	18.8287	0.188287	81.1713	0.811713
18	Afghanistan	Southwest	Helmand		5.78619e+06	1967	1	237557	39826.4	197731	0	121772	20415	101357	0	237830	121471	94401.2	995855360	0.998851	121332	94292.7	1.00363	9.98318e+08	1.67368e+08	8.3095e+08	0	16.765	0.16765	83.235	0.83235
19	Afghanistan	Southwest	Kandahar		4.72988e+06	1967	1	253985	47105.3	206880	0	130193	24146.2	106047	0	255334	152915	110391	1092745344	0.994716	152107	109808	1	1.08697e+09	2.01595e+08	8.85376e+08	0	18.5465	0.185465	81.4535	0.814535
20	Afghanistan	Southwest	Nimruz		4.85038e+06	1967	1	75101.6	697.46	74404.2	0	38497.1	357.52	38139.6	0	76773.2	55272.6	38657.8	430637728	0.978228	54069.2	37816.1	1	4.21262e+08	3.91223e+06	4.1735e+08	0	0.9287	0.00928688	99.0713	0.990713
21	Afghanistan	Southwest	Oruzgan		3.29997e+06	1967	1	123581	72159	51422.2	0	63347.7	36988.7	26359	0	123746	121155	96535.6	632274624	0.998671	120993	96407.2	0.657084	4.14906e+08	2.42263e+08	1.72642e+08	0	58.39	0.5839	41.61	0.4161
22	Afghanistan	Southwest	Zabol		1.91734e+06	1967	1	95532.1	37989.8	57542.3	0	48969.8	19473.6	29496.2	0	94771.9	60856.5	47481.2	381583168	1.00802	61344.7	47862.1	1	3.84644e+08	1.5296e+08	2.31684e+08	0	39.7666	0.397666	60.2334	0.602334
23	Afghanistan	West	Badghis		2.3496e+06	1967	1	48948.7	19182.6	29766.1	0	31191.9	12223.9	18968.1	0	51093	40088.3	31016.1	169705232	0.958032	38405.9	29714.4	1	1.62583e+08	6.3715e+07	9.8868e+07	0	39.1892	0.391892	60.8108	0.608108
24	Afghanistan	West	Farah		5.43946e+06	1967	1	222691	65339	157352	0	141907	41636.5	100271	0	222579	129398	94611.1	1018729664	1.0005	129463	94658.6	1.09612	1.11721e+09	3.27797e+08	7.89413e+08	0	29.3406	0.293406	70.6594	0.706594
25	Afghanistan	West	Herat		4.31652e+06	1967	1	189841	4464.81	185376	0	120974	2845.14	118129	0	187764	97621.1	75437.8	658041728	1.01106	98700.9	76272.3	1.22566	8.15458e+08	1.91785e+07	7.9628e+08	0	2.3519	0.0235187	97.6481	0.976481
26	Afghanistan	Westcentral	Bamian		1.91932e+06	1967	1	51387.1	13074.3	38312.8	0	34820.3	8859.24	25961	0	50615.5	50183.5	39817.4	127938880	1.01524	50948.5	40424.3	0.861369	1.11882e+08	2.8466e+07	8.34164e+07	0	25.4428	0.254428	74.5572	0.745572
27	Afghanistan	Westcentral	Ghowr		3.36281e+06	1967	1	66471.7	15454.7	51017	0	45041.7	10472.2	34569.5	0	65875.7	70936.7	54620.8	330629024	1.00905	71578.5	55114.9	0.817233	2.72646e+08	6.33903e+07	2.09255e+08	0	23.2501	0.232501	76.7499	0.767499
28	Albania				2.87311e+06	2006	1	188450	1000	187450	0	102670	1000	101670	0	340000	180258	180240	742409088	0.554265	99910.9	99900.4	1.02762	4.22855e+08	4.11858e+06	4.18736e+08	0	0.5306	0.00530645	99.4694	0.994694
29	Algeria	Algerois-Hodna-Soumam			5.09493e+06	2001	3	141314	87515.3	50798.6	3000	113051	70012.2	40638.9	2400	141314	139817	126836	901580160	1	139817	126836	0.891317	8.03593e+08	4.97663e+08	2.88871e+08	1.70598e+07	61.9297	0.619297	35.9474	0.359474
30	Algeria	Cheliff-Zahrez			5.9072e+06	2001	3	118896	61298.5	54597.2	3000	95116.6	49038.8	43677.8	2400	118896	109599	93979.4	751879296	1	109599	93979.4	1	7.51879e+08	3.87643e+08	3.45265e+08	1.89716e+07	51.5565	0.515565	45.9203	0.459203
31	Algeria	Constantinious-Seybouse-Mellegue			4.53589e+06	2001	3	72155	33149.9	36005.1	3000	57724	26519.9	28804.1	2400	72155	79706.7	66161.7	479337312	1	79706.7	66161.7	0.872468	418206630	1.92135e+08	2.08684e+08	1.73879e+07	45.9426	0.459426	49.8997	0.498997
32	Algeria	Oranie-Chott Chergui			7.76292e+06	2001	3	99786	48328	48458	3000	79828.8	38662.4	38766.4	2400	99786	101899	87148.3	745874112	1	101899	87148.3	0.916011	6.83229e+08	3.30899e+08	3.31789e+08	2.05408e+07	48.4317	0.484317	48.5619	0.485619
33	Algeria	Sahara			2.08679e+08	2001	3	137267	131777	5490.7	0	109814	105421	4392.56	0	137267	138343	137252	1400040320	1	138343	137252	0.80009	1.12016e+09	1.07535e+09	4.48064e+07	0	96	0.96	4	0.04
34	American Samoa				19481.4	2000	9	0	0	0	0	0	0	0	0	0	0	0	0	1	0	0	1	0	0	0	0	-1	-1	-1	-1
35	Andorra				46688.5	2000	4	150	37.5	112.5	0	150	37.5	112.5	0	150	150	150	272853	1	150	150	1	272853	68213.3	204640	0	25	0.25	75	0.75
36	Angola				1.25158e+08	1975	4	80000	16000	64000	0	35000	7000	28000	0	80000	43151.4	35983.3	218495904	1	43151.4	35983.3	0.972675	2.12525e+08	4.25051e+07	1.7002e+08	0	20	0.2	80	0.8
37	Anguilla				9497.07	-9	9	0	0	0	0	0	0	0	0	0	0	0	0	1	0	0	1	0	0	0	0	-1	-1	-1	-1
38	Antigua and Barbuda				54523.8	1997	4	130	19.5	110.5	0	130	19.5	110.5	0	130	130	130	86752.2	1	130	130	1	86752.2	13012.8	73739.4	0	15	0.15	85	0.85
39	Argentina	BUENOS AIRES			2351.9	2002	4	0	0	0	0	0	0	0	0	0	0	0	0	1	0	0	1	0	0	0	0	-1	-1	-1	-1
40	Argentina	BUENOS AIRES	25 de Mayo		474939	2002	4	1323.09	1248	75.09	0	1248	1177.17	70.83	0	1323.09	1323.07	1323.07	2.07191e+06	1	1323.07	1323.07	0.943261	1.95435e+06	1.84343e+06	110919	0	94.3246	0.943246	5.6754	0.0567535
41	Argentina	BUENOS AIRES	9 de Julio		428428	2002	4	45.91	39.36	6.55	0	43.3	37.12	6.18	0	45.91	45.87	45.87	69977.9	1	45.87	45.87	0.943972	66057.2	56629.2	9428.02	0	85.733	0.85733	14.267	0.14267
42	Argentina	BUENOS AIRES	Adolfo Alsina		595703	2002	4	7.42	0	7.42	0	7	0	7	0	7.42	7.33	7.33	32709.9	1	7.33	7.33	0.95498	31237.3	0	31237.3	0	0	0	100	1
43	Argentina	BUENOS AIRES	Adolfo Gonzales Chaves		379931	2002	4	12293.7	7730.67	4563.05	0	11596	7291.92	4304.08	0	12293.7	11998	11998	36057152	1	11998	11998	0.966494	3.4849e+07	2.19141e+07	1.29349e+07	0	62.8831	0.628831	37.1169	0.371169
44	Argentina	BUENOS AIRES	Alberti		111021	2002	4	0	0	0	0	0	0	0	0	0	0	0	0	1	0	0	1	0	0	0	0	-1	-1	-1	-1
45	Argentina	BUENOS AIRES	Almirante Brown		12784.6	2002	4	26.5	24.17	2.33	0	25	22.8	2.2	0	26.5	26.5	26.5	47262.3	1	26.5	26.5	0.943396	44587.1	40663.4	3923.66	0	91.2075	0.912075	8.7925	0.0879245
46	Argentina	BUENOS AIRES	Ameghino		183901	2002	4	90.11	56.67	33.44	0	85	53.46	31.54	0	90.11	90.09	90.09	187582	1	90.09	90.09	0.943501	176984	111313	65671.5	0	62.8898	0.628898	37.1102	0.371102
47	Argentina	BUENOS AIRES	Arrecifes		123319	2002	4	3679.85	2776.8	903.05	0	3471	2619.2	851.8	0	3679.85	3556.1	3556.1	5511608	1	3556.1	3556.1	0.976069	5.37971e+06	4.0595e+06	1.32021e+06	0	75.4596	0.754596	24.5404	0.245404
48	Argentina	BUENOS AIRES	Avellaneda		5246.11	2002	4	12.93	12.2	0.73	0	12.2	11.51	0.69	0	12.93	11.94	11.94	20101.9	1	11.94	11.94	1.02178	20539.7	19378	1161.67	0	94.3542	0.943542	5.6458	0.0564578
49	Argentina	BUENOS AIRES	Ayacucho		674861	2002	4	49.83	37.6	12.23	0	47	35.46	11.54	0	49.83	49.79	49.79	117640	1	49.79	49.79	0.943965	111048	83782	27265.8	0	75.4566	0.754566	24.5434	0.245434
50	Argentina	BUENOS AIRES	Azul		656088	2002	4	1452.33	1095.92	356.41	0	1369.9	1033.72	336.18	0	1452.33	1452.32	1452.32	3.99343e+06	1	1452.32	1452.32	0.943249	3.7668e+06	2.84241e+06	924390	0	75.4594	0.754594	24.5406	0.245406
51	Argentina	BUENOS AIRES	Bahia Blanca		228337	2002	4	395.97	79.23	316.74	0	373.5	74.73	298.77	0	395.97	395.97	395.97	2.39565e+06	1	395.97	395.97	0.943253	2.25971e+06	452123	1.80758e+06	0	20.0091	0.200091	79.9909	0.799909
52	Argentina	BUENOS AIRES	Balcarce		409718	2002	4	7414.93	6257.88	1157.05	0	6994.1	5902.72	1091.38	0	7414.93	7414.93	7414.93	18462390	1	7414.93	7414.93	0.943246	1.74146e+07	1.46971e+07	2.71742e+06	0	84.3957	0.843957	15.6043	0.156043
53	Argentina	BUENOS AIRES	Baradero		153390	2002	4	3372.61	1638.8	1733.81	0	3181.2	1545.79	1635.41	0	3372.61	3372.61	3372.61	5.95491e+06	1	3372.61	3372.61	0.943246	5.61694e+06	2.72935e+06	2.88759e+06	0	48.5914	0.485914	51.4086	0.514086
54	Argentina	BUENOS AIRES	Benito Juarez		530478	2002	4	298.97	188	110.97	0	282	177.33	104.67	0	298.97	298.8	298.8	872909	1	298.8	298.8	0.943775	823830	518049	305781	0	62.8826	0.628826	37.1174	0.371174
55	Argentina	BUENOS AIRES	Berazategui		21557.1	2002	4	440.92	410.12	30.8	0	415.9	386.85	29.05	0	440.92	438.08	438.08	788926	1	438.08	438.08	0.94937	748982	696667	52315.3	0	93.0146	0.930146	6.9854	0.0698539
56	Argentina	BUENOS AIRES	Berisso		15172.2	2002	4	9.97	0	9.97	0	9.4	0	9.4	0	9.97	9.56	9.56	15909.8	1	9.56	9.56	0.983264	15643.5	0	15643.5	0	0	0	100	1
57	Argentina	BUENOS AIRES	Bolivar		491280	2002	4	5.19	2.94	2.25	0	4.9	2.78	2.12	0	5.19	5.11	5.11	11700.1	1	5.11	5.11	0.958904	11219.3	6365.25	4854.07	0	56.6474	0.566474	43.3526	0.433526
58	Argentina	BUENOS AIRES	Bragado		219429	2002	4	803.61	324.86	478.75	0	758	306.42	451.58	0	803.61	803.6	803.6	1.07304e+06	1	803.6	803.6	0.943255	1.01215e+06	409159	602990	0	40.4251	0.404251	59.5749	0.595749
59	Argentina	BUENOS AIRES	Brandsen		113756	2002	4	0	0	0	0	0	0	0	0	0	0	0	0	1	0	0	1	0	0	0	0	-1	-1	-1	-1
60	Argentina	BUENOS AIRES	Campana		99669.8	2002	4	128.28	44	84.28	0	121	41.5	79.5	0	128.28	108.18	108.18	186139	1	108.18	108.18	1.11851	208198	71406.8	136791	0	34.3	0.343	65.7	0.657
61	Argentina	BUENOS AIRES	Canuelas		119477	2002	4	332.04	313.2	18.84	0	313.2	295.43	17.77	0	332.04	331.78	331.78	752014	1	331.78	331.78	0.943999	709901	669623	40277.6	0	94.326	0.94326	5.674	0.0567402
62	Argentina	BUENOS AIRES	Capitan Sarmiento		55387.6	2002	4	23.32	0	23.32	0	22	0	22	0	23.32	23.32	23.32	44451.4	1	23.32	23.32	0.943396	41935.2	0	41935.2	0	0	0	100	1
63	Argentina	BUENOS AIRES	Carlos Casares		251761	2002	4	0	0	0	0	0	0	0	0	0	0	0	0	1	0	0	1	0	0	0	0	-1	-1	-1	-1
64	Argentina	BUENOS AIRES	Carlos Tejedor		390254	2002	4	2.01	1.9	0.11	0	1.9	1.8	0.1	0	2.01	1.95	1.95	4993.08	1	1.95	1.95	0.974359	4865.05	4608.99	256.06	0	94.5274	0.945274	5.4726	0.0547264
65	Argentina	BUENOS AIRES	Carmen de Areco		105267	2002	4	604.3	456	148.3	0	570	430.12	139.88	0	604.3	604.3	604.3	1.15731e+06	1	604.3	604.3	0.94324	1.09162e+06	823736	267888	0	75.4592	0.754592	24.5408	0.245408
66	Argentina	BUENOS AIRES	Castelli		213092	2002	4	0	0	0	0	0	0	0	0	0	0	0	0	1	0	0	1	0	0	0	0	-1	-1	-1	-1
67	Argentina	BUENOS AIRES	Chacabuco		228093	2002	4	897.11	604.43	292.68	0	846.2	570.13	276.07	0	897.11	897.1	897.1	1.397e+06	1	897.1	897.1	0.943262	1.31774e+06	887830	429908	0	67.3752	0.673752	32.6248	0.326248
68	Argentina	BUENOS AIRES	Chascomus		420584	2002	4	9.54	5.73	3.81	0	9	5.41	3.59	0	9.54	9.5	9.5	21066.7	1	9.5	9.5	0.947368	19957.9	11996.9	7961	0	60.0629	0.600629	39.9371	0.399371
69	Argentina	BUENOS AIRES	Chivilcoy		207818	2002	4	605.04	507.29	97.75	0	570.7	478.5	92.2	0	605.04	605.03	605.03	1069854	1	605.03	605.03	0.943259	1.00915e+06	846115	163034	0	83.844	0.83844	16.156	0.16156
70	Argentina	BUENOS AIRES	Colon		101280	2002	4	1502.79	850.5	652.29	0	1417.5	802.23	615.27	0	1502.79	1502.79	1502.79	2584493	1	1502.79	1502.79	0.943246	2.43781e+06	1.37967e+06	1.05814e+06	0	56.5947	0.565947	43.4053	0.434053
71	Argentina	BUENOS AIRES	Coronel de Mariana Leonar		135335	2002	4	351.45	110.5	240.95	0	331.5	104.23	227.27	0	351.45	351.44	351.44	2.11975e+06	1	351.44	351.44	0.943262	1999482	628676	1.37081e+06	0	31.4412	0.314412	68.5588	0.685588
72	Argentina	BUENOS AIRES	Coronel Dorrego		582699	2002	4	295.79	167.4	128.39	0	279	157.9	121.1	0	295.79	295.74	295.74	1.39075e+06	1	295.74	295.74	0.943396	1.31203e+06	742543	569487	0	56.5942	0.565942	43.4058	0.434058
73	Argentina	BUENOS AIRES	Coronel Pringles		523709	2002	4	53.01	0	53.01	0	50	0	50	0	53.01	52.94	52.94	250703	1	52.94	52.94	0.944465	236780	0	236780	0	0	0	100	1
74	Argentina	BUENOS AIRES	Coronel Suarez		596812	2002	4	6063.74	2859.8	3203.94	0	5719.6	2697.5	3022.1	0	6063.74	6063.74	6063.74	21936476	1	6063.74	6063.74	0.943246	2.06915e+07	9.75861e+06	1.09329e+07	0	47.1623	0.471623	52.8377	0.528377
75	Argentina	BUENOS AIRES	Daireaux		384844	2002	4	589.77	556.3	33.47	0	556.3	524.73	31.57	0	589.77	589.75	589.75	1587034	1	589.75	589.75	0.943281	1.49702e+06	1.41206e+06	84955.8	0	94.3249	0.943249	5.6751	0.0567509
76	Argentina	BUENOS AIRES	Dolores		197051	2002	4	1.06	0.33	0.73	0	1	0.31	0.69	0	1.06	1.05	1.05	2312.59	1	1.05	1.05	0.952381	2202.47	682.77	1519.7	0	31.1321	0.311321	68.8679	0.688679
77	Argentina	BUENOS AIRES	Ensenada		10195.7	2002	4	0	0	0	0	0	0	0	0	0	0	0	0	1	0	0	1	0	0	0	0	-1	-1	-1	-1
78	Argentina	BUENOS AIRES	Escobar		29430.8	2002	4	894.99	831.12	63.87	0	844.2	783.95	60.25	0	894.99	802.5	802.5	1.25344e+06	1	802.5	802.5	1.05196	1.31858e+06	1.22447e+06	94105.9	0	92.8636	0.928636	7.1364	0.0713639
79	Argentina	BUENOS AIRES	Esteban Echeverria		38881.9	2002	4	34.99	33	1.99	0	33	31.12	1.88	0	34.99	34.99	34.99	67593	1	34.99	34.99	0.943127	63748.8	60117	3631.75	0	94.3127	0.943127	5.6873	0.0568734
80	Argentina	BUENOS AIRES	Exaltacion de la Cruz		64513.9	2002	4	849.2	175.22	673.98	0	801	165.27	635.73	0	849.2	849.2	849.2	1.72765e+06	1	849.2	849.2	0.943241	1.62959e+06	336233	1.29336e+06	0	20.6335	0.206335	79.3665	0.793665
81	Argentina	BUENOS AIRES	Florencio Varela		20384.6	2002	4	868.17	808.97	59.2	0	818.9	763.06	55.84	0	868.17	823.94	823.94	1.59385e+06	1	823.94	823.94	0.993883	1.5841e+06	1.47608e+06	108018	0	93.1811	0.931811	6.8189	0.0681894
82	Argentina	BUENOS AIRES	General Alvarado		163874	2002	4	6395.89	5347.34	1048.55	0	6032.9	5043.86	989.04	0	6395.89	6395.89	6395.89	16023589	1	6395.89	6395.89	0.943246	1.51142e+07	1.26364e+07	2.47784e+06	0	83.6059	0.836059	16.3941	0.163941
83	Argentina	BUENOS AIRES	General Alvear		336463	2002	4	5.3	2.5	2.8	0	5	2.36	2.64	0	5.3	5.22	5.22	9652.99	1	5.22	5.22	0.957854	9246.16	4364.19	4881.97	0	47.1698	0.471698	52.8302	0.528302
84	Argentina	BUENOS AIRES	General Arenales		149124	2002	4	14.21	11.17	3.04	0	13.4	10.53	2.87	0	14.21	14.2	14.2	22372.6	1	14.2	14.2	0.943662	21112.2	16590.4	4521.78	0	78.6066	0.786066	21.3934	0.213934
85	Argentina	BUENOS AIRES	General Belgrano		183198	2002	4	287.41	169.44	117.97	0	271.1	159.82	111.28	0	287.41	287.38	287.38	627282	1	287.38	287.38	0.94335	591747	348849	242898	0	58.9541	0.589541	41.0459	0.410459
86	Argentina	BUENOS AIRES	General Guido		234325	2002	4	0	0	0	0	0	0	0	0	0	0	0	0	1	0	0	1	0	0	0	0	-1	-1	-1	-1
87	Argentina	BUENOS AIRES	General Juan Madariaga		300075	2002	4	103.9	32.66	71.24	0	98	30.81	67.19	0	103.9	103.86	103.86	228256	1	103.86	103.86	0.943578	215377	67712	147665	0	31.4341	0.314341	68.5659	0.685659
88	Argentina	BUENOS AIRES	General La Madrid		476426	2002	4	313.81	296	17.81	0	296	279.2	16.8	0	313.81	313.77	313.77	1.09645e+06	1	313.77	313.77	0.943366	1.03435e+06	975644	58706.4	0	94.3246	0.943246	5.6754	0.0567541
89	Argentina	BUENOS AIRES	General Las Heras		75252.4	2002	4	0	0	0	0	0	0	0	0	0	0	0	0	1	0	0	1	0	0	0	0	-1	-1	-1	-1
90	Argentina	BUENOS AIRES	General Lavalle		268316	2002	4	34.77	32.8	1.97	0	32.8	30.94	1.86	0	34.77	34.74	34.74	76740.9	1	34.74	34.74	0.944157	72455.5	68346.7	4108.76	0	94.3342	0.943342	5.6658	0.056658
91	Argentina	BUENOS AIRES	General Paz		118957	2002	4	2.12	1	1.12	0	2	0.94	1.06	0	2.12	2.12	2.12	4626.2	1	2.12	2.12	0.943396	4364.34	2051.24	2313.1	0	47.1698	0.471698	52.8302	0.528302
92	Argentina	BUENOS AIRES	General Pinto		254963	2002	4	985.96	697.5	288.46	0	930	657.91	272.09	0	985.96	985.95	985.95	1727566	1	985.95	985.95	0.943253	1.62953e+06	1.15278e+06	476752	0	70.7432	0.707432	29.2568	0.292568
93	Argentina	BUENOS AIRES	General Pueyrredon		145249	2002	4	10629	8125.75	2503.29	0	10025.8	7664.58	2361.22	0	10629	10629	10629	27702610	1	10629	10629	0.943246	2.61304e+07	1.99763e+07	6.15408e+06	0	76.4486	0.764486	23.5514	0.235514
94	Argentina	BUENOS AIRES	General Rodriguez		36185.7	2002	4	377.95	356.5	21.45	0	356.5	336.27	20.23	0	377.95	377.95	377.95	806953	1	377.95	377.95	0.943246	761156	717963	43192.7	0	94.3246	0.943246	5.6754	0.0567535
95	Argentina	BUENOS AIRES	General San Martin		5623.59	2002	4	0.11	0.1	0.01	0	0.1	0.09	0.01	0	0.11	0.11	0.11	214.73	1	0.11	0.11	0.909091	195.21	175.69	19.52	0	90.9091	0.909091	9.0909	0.0909091
96	Argentina	BUENOS AIRES	General Sarmiento		20439.8	2002	4	37.32	35.2	2.12	0	35.2	33.2	2	0	37.32	37.32	37.32	62451.2	1	37.32	37.32	0.943194	58903.6	55556.8	3346.79	0	94.3194	0.943194	5.6806	0.056806
97	Argentina	BUENOS AIRES	General Viamonte		215801	2002	4	0	0	0	0	0	0	0	0	0	0	0	0	1	0	0	1	0	0	0	0	-1	-1	-1	-1
98	Argentina	BUENOS AIRES	General Villegas		736769	2002	4	0	0	0	0	0	0	0	0	0	0	0	0	1	0	0	1	0	0	0	0	-1	-1	-1	-1
99	Argentina	BUENOS AIRES	Guamin		482033	2002	4	1828.79	1725	103.79	0	1725	1627.1	97.9	0	1828.79	1828.78	1828.78	5.55122e+06	1	1828.78	1828.78	0.943252	5.2362e+06	4.93902e+06	297173	0	94.3247	0.943247	5.6753	0.0567534
100	Argentina	BUENOS AIRES	Hipolito Yrigoyen		162315	2002	4	27.99	8.8	19.19	0	26.4	8.3	18.1	0	27.99	27.97	27.97	65182.4	1	27.97	27.97	0.943868	61523.6	19342.7	42181	0	31.4398	0.314398	68.5602	0.685602
101	Argentina	BUENOS AIRES	Junin		226546	2002	4	545.14	514.2	30.94	0	514.2	485.02	29.18	0	545.14	545.13	545.13	745702	1	545.13	545.13	0.943261	703392	663475	39916.3	0	94.3244	0.943244	5.6756	0.0567561
102	Argentina	BUENOS AIRES	La Costa		31067.2	2002	4	1.06	0.57	0.49	0	1	0.54	0.46	0	1.06	1.06	1.06	2020.04	1	1.06	1.06	0.943396	1905.7	1029.08	876.62	0	53.7736	0.537736	46.2264	0.462264
103	Argentina	BUENOS AIRES	La Matanza		32439.3	2002	4	358.34	338	20.34	0	338	318.81	19.19	0	358.34	358.34	358.34	788012	1	358.34	358.34	0.943238	743283	701083	42200	0	94.3238	0.943238	5.6762	0.0567617
104	Argentina	BUENOS AIRES	La Plata		86766.2	2002	4	3586.02	3368.73	217.29	0	3382.5	3177.54	204.96	0	3586.02	3407.74	3407.74	6643545	1	3407.74	3407.74	0.992593	6.59434e+06	6.19476e+06	399579	0	93.9406	0.939406	6.0594	0.0605936
105	Argentina	BUENOS AIRES	Lanus		4946.76	2002	4	0	0	0	0	0	0	0	0	0	0	0	0	1	0	0	1	0	0	0	0	-1	-1	-1	-1
106	Argentina	BUENOS AIRES	Laprida		341510	2002	4	530.08	333.32	196.76	0	500	314.41	185.59	0	530.08	529.64	529.64	1.62799e+06	1	529.64	529.64	0.944037	1.53689e+06	966425	570462	0	62.8811	0.628811	37.1189	0.371189
107	Argentina	BUENOS AIRES	Las Flores		336629	2002	4	4.24	4	0.24	0	4	3.77	0.23	0	4.24	4.17	4.17	9130	1	4.17	4.17	0.959233	8757.79	8254.22	503.57	0	94.3396	0.943396	5.6604	0.0566038
108	Argentina	BUENOS AIRES	Leonardo N. Alem		160583	2002	4	0	0	0	0	0	0	0	0	0	0	0	0	1	0	0	1	0	0	0	0	-1	-1	-1	-1
109	Argentina	BUENOS AIRES	Lincoln		575686	2002	4	34.56	32.6	1.96	0	32.6	30.75	1.85	0	34.56	34.51	34.51	55334.9	1	34.51	34.51	0.944654	52272.4	49306	2966.38	0	94.3287	0.943287	5.6713	0.056713
110	Argentina	BUENOS AIRES	Loberia		473163	2002	4	4736.83	3351	1385.83	0	4468	3160.82	1307.18	0	4736.83	4736.83	4736.83	12055527	1	4736.83	4736.83	0.943247	1.13713e+07	8.04448e+06	3.32685e+06	0	70.7435	0.707435	29.2565	0.292565
111	Argentina	BUENOS AIRES	Lobos		174392	2002	4	63.93	60.3	3.63	0	60.3	56.88	3.42	0	63.93	63.93	63.93	140046	1	63.93	63.93	0.943219	132094	124603	7491.93	0	94.3219	0.943219	5.6781	0.0567809
112	Argentina	BUENOS AIRES	Lomas de Zamora		8792.84	2002	4	0	0	0	0	0	0	0	0	0	0	0	0	1	0	0	1	0	0	0	0	-1	-1	-1	-1
113	Argentina	BUENOS AIRES	Lujan		76957.2	2002	4	261.86	247	14.86	0	247	232.98	14.02	0	261.86	261.85	261.85	575191	1	261.85	261.85	0.943288	542571	511774	30796.9	0	94.3252	0.943252	5.6748	0.0567479
114	Argentina	BUENOS AIRES	Magdalena		354960	2002	4	53.01	28.33	24.68	0	42.5	22.71	19.79	0	53.01	53.01	53.01	108435	1	53.01	53.01	0.801736	86936	46454.5	40481.5	0	53.4427	0.534427	46.5573	0.465573
115	Argentina	BUENOS AIRES	Maipu		259372	2002	4	0	0	0	0	0	0	0	0	0	0	0	0	1	0	0	1	0	0	0	0	-1	-1	-1	-1
116	Argentina	BUENOS AIRES	Mar Chiquita		312278	2002	4	232.18	219	13.18	0	219	206.57	12.43	0	232.18	232.16	232.16	532189	1	232.16	232.16	0.943315	502022	473528	28493.8	0	94.3234	0.943234	5.6766	0.0567663
117	Argentina	BUENOS AIRES	Marcos Paz		43024	2002	4	545.99	266.38	279.61	0	515	251.26	263.74	0	545.99	538.53	538.53	1172188	1	538.53	538.53	0.956307	1.12097e+06	546904	574068	0	48.7884	0.487884	51.2116	0.512116
118	Argentina	BUENOS AIRES	Mercedes		105115	2002	4	131.57	93.07	38.5	0	124.1	87.79	36.31	0	131.57	131.56	131.56	286859	1	131.56	131.56	0.943296	270593	191421	79172	0	70.738	0.70738	29.262	0.29262
119	Argentina	BUENOS AIRES	Merlo		17212.8	2002	4	228.36	132.18	96.18	0	215.4	124.68	90.72	0	228.36	228.36	228.36	516793	1	228.36	228.36	0.943248	487463	282158	205305	0	57.8823	0.578823	42.1177	0.421177
120	Argentina	BUENOS AIRES	Monte		188079	2002	4	0	0	0	0	0	0	0	0	0	0	0	0	1	0	0	1	0	0	0	0	-1	-1	-1	-1
121	Argentina	BUENOS AIRES	Monte Hermoso		20369.8	2002	4	0	0	0	0	0	0	0	0	0	0	0	0	1	0	0	1	0	0	0	0	-1	-1	-1	-1
122	Argentina	BUENOS AIRES	Moreno		18401.1	2002	4	178.64	166.73	11.91	0	168.5	157.27	11.23	0	178.64	178.64	178.64	309047	1	178.64	178.64	0.943238	291504	272077	19427.9	0	93.333	0.93333	6.667	0.0666704
123	Argentina	BUENOS AIRES	Moron		12768.7	2002	4	0	0	0	0	0	0	0	0	0	0	0	0	1	0	0	1	0	0	0	0	-1	-1	-1	-1
124	Argentina	BUENOS AIRES	Navarro		160878	2002	4	54.07	16.99	37.08	0	51	16.03	34.97	0	54.07	54.06	54.06	115961	1	54.06	54.06	0.943396	109397	34385.1	75012.2	0	31.4222	0.314222	68.5778	0.685778
125	Argentina	BUENOS AIRES	Necochea		451014	2002	4	2034.68	1389.77	644.91	0	1919.2	1310.89	608.31	0	2034.68	2034.67	2034.67	5.34055e+06	1	2034.67	2034.67	0.943249	5.03747e+06	3.44079e+06	1.59668e+06	0	68.3041	0.683041	31.6959	0.316959
126	Argentina	BUENOS AIRES	Olavarria		775194	2002	4	457.78	392.55	65.23	0	431.8	370.27	61.53	0	457.78	457.76	457.76	1.34079e+06	1	457.76	457.76	0.943289	1.26475e+06	1.08453e+06	180223	0	85.7508	0.857508	14.2492	0.142492
127	Argentina	BUENOS AIRES	Patagones		1.362e+06	2002	4	23179.8	0	23179.8	0	21864.2	0	21864.2	0	23179.8	18909.5	18909.5	112473352	1	18909.5	18909.5	1.15625	1.30048e+08	0	1.30048e+08	0	0	0	100	1
128	Argentina	BUENOS AIRES	Patagones (Is.)		8329.48	2002	4	0	0	0	0	0	0	0	0	0	0	0	0	1	0	0	1	0	0	0	0	-1	-1	-1	-1
129	Argentina	BUENOS AIRES	Pehuajo		451596	2002	4	307.45	290	17.45	0	290	273.54	16.46	0	307.45	307.42	307.42	705395	1	307.42	307.42	0.943335	665423	627655	37768.5	0	94.3243	0.943243	5.6757	0.0567572
130	Argentina	BUENOS AIRES	Pellegrini		185537	2002	4	63.61	59.99	3.62	0	60	56.59	3.41	0	63.61	63.59	63.59	245232	1	63.59	63.59	0.943545	231388	218237	13150.5	0	94.3091	0.943091	5.6909	0.0569093
131	Argentina	BUENOS AIRES	Pergamino		304734	2002	4	2909.85	2658.93	250.92	0	2744.7	2508.02	236.68	0	2909.85	2909.84	2909.84	5.05612e+06	1	2909.84	2909.84	0.943248	4.76917e+06	4.35792e+06	411254	0	91.3769	0.913769	8.6231	0.0862312
132	Argentina	BUENOS AIRES	Pila		345056	2002	4	0	0	0	0	0	0	0	0	0	0	0	0	1	0	0	1	0	0	0	0	-1	-1	-1	-1
133	Argentina	BUENOS AIRES	Pilar		37827.4	2002	4	440.39	384.25	56.14	0	415.4	362.45	52.95	0	440.39	392.02	392.02	709709	1	392.02	392.02	1.05964	752036	656176	95860.2	0	87.2522	0.872522	12.7478	0.127478
134	Argentina	BUENOS AIRES	Pinamar		8722.71	2002	4	0	0	0	0	0	0	0	0	0	0	0	0	1	0	0	1	0	0	0	0	-1	-1	-1	-1
135	Argentina	BUENOS AIRES	Puan		641486	2002	4	27.56	26	1.56	0	26	24.53	1.47	0	27.56	27.46	27.46	152864	1	27.46	27.46	0.946832	144736	136553	8183.18	0	94.3396	0.943396	5.6604	0.0566038
136	Argentina	BUENOS AIRES	Quilmes		8874.08	2002	4	28.62	27	1.62	0	27	25.47	1.53	0	28.62	28.62	28.62	49585.4	1	28.62	28.62	0.943396	46778.7	44127.9	2650.79	0	94.3396	0.943396	5.6604	0.0566038
137	Argentina	BUENOS AIRES	Ramallo		108641	2002	4	1147.1	1082	65.1	0	1082	1020.59	61.41	0	1147.1	1147.1	1147.1	2001356	1	1147.1	1147.1	0.943248	1.88778e+06	1.78063e+06	107143	0	94.3248	0.943248	5.6752	0.0567518
138	Argentina	BUENOS AIRES	Rauch		426877	2002	4	34.99	33	1.99	0	33	31.12	1.88	0	34.99	34.98	34.98	89156.2	1	34.98	34.98	0.943396	84109.7	79318	4791.7	0	94.3127	0.943127	5.6873	0.0568734
139	Argentina	BUENOS AIRES	Rivadavia		398360	2002	4	1.59	1.51	0.08	0	1.5	1.42	0.08	0	1.59	1.54	1.54	5130.91	1	1.54	1.54	0.974026	4997.64	4731.1	266.54	0	94.9686	0.949686	5.0314	0.0503145
140	Argentina	BUENOS AIRES	Rojas		202336	2002	4	8670.27	6920.02	1750.25	0	8178.2	6527.28	1650.92	0	8670.27	8670.27	8670.27	13446174	1	8670.27	8670.27	0.943246	1.26831e+07	1.01227e+07	2.56031e+06	0	79.8132	0.798132	20.1868	0.201868
141	Argentina	BUENOS AIRES	Roque Perez		155985	2002	4	241.72	136.81	104.91	0	228	129.04	98.96	0	241.72	241.71	241.71	460223	1	241.71	241.71	0.943279	434119	245696	188423	0	56.5985	0.565985	43.4015	0.434015
142	Argentina	BUENOS AIRES	Saavedra		348772	2002	4	798.84	251.17	547.67	0	753.5	236.91	516.59	0	798.84	798.83	798.83	3.55634e+06	1	798.83	798.83	0.943255	3.35454e+06	1.05471e+06	2.29983e+06	0	31.4418	0.314418	68.5582	0.685582
143	Argentina	BUENOS AIRES	Saladillo		269837	2002	4	370	249.29	120.71	0	349	235.14	113.86	0	370	369.97	369.97	613890	1	369.97	369.97	0.94332	579095	390167	188928	0	67.3757	0.673757	32.6243	0.326243
144	Argentina	BUENOS AIRES	Salliquello		80554.7	2002	4	0	0	0	0	0	0	0	0	0	0	0	0	1	0	0	1	0	0	0	0	-1	-1	-1	-1
145	Argentina	BUENOS AIRES	Salto		161455	2002	4	2588.93	1554	1034.93	0	2442	1465.81	976.19	0	2588.93	2586.37	2586.37	4.2418e+06	1	2586.37	2586.37	0.94418	4.00503e+06	2.40402e+06	1.60101e+06	0	60.0248	0.600248	39.9752	0.399752
146	Argentina	BUENOS AIRES	San Andres de Giles		112407	2002	4	321.44	220.51	100.93	0	303.2	208	95.2	0	321.44	321.44	321.44	643040	1	321.44	321.44	0.943255	606551	416103	190447	0	68.6007	0.686007	31.3993	0.313993
147	Argentina	BUENOS AIRES	San Antonio de Areco		86982	2002	4	1896.64	1192.67	703.97	0	1789	1124.98	664.02	0	1896.64	1896.64	1896.64	3.70764e+06	1	1896.64	1896.64	0.943247	3.49722e+06	2.19916e+06	1.29806e+06	0	62.8833	0.628833	37.1167	0.371167
148	Argentina	BUENOS AIRES	San Cayetano		299050	2002	4	293.14	138.25	154.89	0	276.5	130.4	146.1	0	293.14	293.02	293.02	843549	1	293.02	293.02	0.943622	795991	375397	420594	0	47.1618	0.471618	52.8382	0.528382
149	Argentina	BUENOS AIRES	San Fernando		91416	2002	4	0	0	0	0	0	0	0	0	0	0	0	0	1	0	0	1	0	0	0	0	-1	-1	-1	-1
150	Argentina	BUENOS AIRES	San Isidro		5124.26	2002	4	0.11	0.1	0.01	0	0.1	0.09	0.01	0	0.11	0.11	0.11	174.66	1	0.11	0.11	0.909091	158.78	142.9	15.88	0	90.9091	0.909091	9.0909	0.0909091
151	Argentina	BUENOS AIRES	San Nicolas		66633.6	2002	4	1652.49	1298.92	353.57	0	1558.7	1225.2	333.5	0	1652.49	1652.49	1652.49	2.86606e+06	1	1652.49	1652.49	0.943243	2.70339e+06	2.12497e+06	578418	0	78.6038	0.786038	21.3962	0.213962
152	Argentina	BUENOS AIRES	San Pedro		136747	2002	4	3793.6	3367.82	425.78	0	3578.3	3176.68	401.62	0	3793.6	3793.6	3793.6	6.56345e+06	1	3793.6	3793.6	0.943247	6.19095e+06	5.49609e+06	694857	0	88.7764	0.887764	11.2236	0.112236
153	Argentina	BUENOS AIRES	San Vicente		74026.1	2002	4	0	0	0	0	0	0	0	0	0	0	0	0	1	0	0	1	0	0	0	0	-1	-1	-1	-1
154	Argentina	BUENOS AIRES	Suipacha		93704.8	2002	4	0	0	0	0	0	0	0	0	0	0	0	0	1	0	0	1	0	0	0	0	-1	-1	-1	-1
155	Argentina	BUENOS AIRES	Tandil		484850	2002	4	2625.61	1807.25	818.36	0	2476.6	1704.68	771.92	0	2625.61	2625.61	2625.61	7.0303e+06	1	2625.61	2625.61	0.943247	6.63131e+06	4.56443e+06	2.06688e+06	0	68.8316	0.688316	31.1684	0.311684
156	Argentina	BUENOS AIRES	Taplquen		410553	2002	4	0	0	0	0	0	0	0	0	0	0	0	0	1	0	0	1	0	0	0	0	-1	-1	-1	-1
157	Argentina	BUENOS AIRES	Tigre		36108.5	2002	4	27.25	11.24	16.01	0	25.7	10.6	15.1	0	27.25	27.2	27.2	32963.9	1	27.2	27.2	0.944853	31146	12846.2	18299.8	0	41.2477	0.412477	58.7523	0.587523
158	Argentina	BUENOS AIRES	Tordillo		131856	2002	4	0	0	0	0	0	0	0	0	0	0	0	0	1	0	0	1	0	0	0	0	-1	-1	-1	-1
159	Argentina	BUENOS AIRES	Tornquist		420122	2002	4	309.04	97.16	211.88	0	291.5	91.65	199.85	0	309.04	309.04	309.04	1.58858e+06	1	309.04	309.04	0.943244	1.49842e+06	471115	1.0273e+06	0	31.4393	0.314393	68.5607	0.685607
160	Argentina	BUENOS AIRES	Trenque Lauquen		545948	2002	4	337.13	318	19.13	0	318	299.96	18.04	0	337.13	337.13	337.13	1.03795e+06	1	337.13	337.13	0.943256	979049	923508	55541	0	94.3256	0.943256	5.6744	0.0567437
161	Argentina	BUENOS AIRES	Tres Arroyos		597919	2002	4	363.64	245	118.64	0	343	231.09	111.91	0	363.64	363.64	363.64	1.08678e+06	1	363.64	363.64	0.943241	1.02509e+06	690638	334455	0	67.3743	0.673743	32.6257	0.326257
162	Argentina	BUENOS AIRES	Tres de Febrero		4555.67	2002	4	1.7	1.6	0.1	0	1.6	1.51	0.09	0	1.7	1.7	1.7	3317.76	1	1.7	1.7	0.941176	3122.6	2946.95	175.65	0	94.1176	0.941176	5.8824	0.0588235
163	Argentina	BUENOS AIRES	Tres Lomas		123966	2002	4	657.3	620	37.3	0	620	584.82	35.18	0	657.3	657.3	657.3	2.34482e+06	1	657.3	657.3	0.943253	2.21176e+06	2.08626e+06	125500	0	94.3253	0.943253	5.6747	0.0567473
164	Argentina	BUENOS AIRES	Vicente Lopez		3346.37	2002	4	0	0	0	0	0	0	0	0	0	0	0	0	1	0	0	1	0	0	0	0	-1	-1	-1	-1
165	Argentina	BUENOS AIRES	Villa Gesell		18187.6	2002	4	0	0	0	0	0	0	0	0	0	0	0	0	1	0	0	1	0	0	0	0	-1	-1	-1	-1
166	Argentina	BUENOS AIRES	Villarino		1.01307e+06	2002	4	41447.6	2130.79	39316.8	0	39095.3	2009.86	37085.4	0	41447.6	34969.7	34969.7	221301200	1	34969.7	34969.7	1.11798	2.4741e+08	1.27191e+07	234690396	0	5.1409	0.0514092	94.8591	0.948591
167	Argentina	BUENOS AIRES	Villarino (Is.)		27929.1	2002	4	0	0	0	0	0	0	0	0	0	0	0	0	1	0	0	1	0	0	0	0	-1	-1	-1	-1
168	Argentina	BUENOS AIRES	Zarate		122595	2002	4	1049.25	970.67	78.58	0	989.7	915.58	74.12	0	1049.25	1038.34	1038.34	1.81185e+06	1	1038.34	1038.34	0.953156	1.72698e+06	1.59764e+06	129336	0	92.5108	0.925108	7.4892	0.0748916
169	Argentina	BUENOS AIRES D.F.	Capital Federal		18510.6	2002	4	0	0	0	0	0	0	0	0	0	0	0	0	1	0	0	1	0	0	0	0	-1	-1	-1	-1
170	Argentina	CATAMARCA	Ambato		175299	2002	4	1871.6	61.2	1810.4	0	1795.1	58.7	1736.4	0	1871.6	1774.39	1774.39	11725226	1	1774.39	1774.39	1.01167	1.18621e+07	387891	1.14742e+07	0	3.2699	0.0326993	96.7301	0.967301
171	Argentina	CATAMARCA	Ancasti		208358	2002	4	4.17	0	4.17	0	4	0	4	0	4.17	4.16	4.16	24080.2	1	4.16	4.16	0.961538	23154	0	23154	0	0	0	100	1
172	Argentina	CATAMARCA	Andalgala		468873	2002	4	1992.44	35.06	1957.38	0	1911	33.63	1877.37	0	1992.44	1892.58	1892.58	9957357	1	1892.58	1892.58	1.00973	1.00543e+07	176936	9.87733e+06	0	1.7597	0.0175965	98.2403	0.982403
173	Argentina	CATAMARCA	Antofagasta de la Sierra		2.87467e+06	2002	4	184.86	0	184.86	0	177.3	0	177.3	0	184.86	184.86	184.86	1.05821e+06	1	184.86	184.86	0.959104	1.01493e+06	0	1.01493e+06	0	0	0	100	1
174	Argentina	CATAMARCA	Belen		1.30097e+06	2002	4	3436.05	0	3436.05	0	3295.6	0	3295.6	0	3436.05	3264.31	3264.31	24193388	1	3264.31	3264.31	1.00959	2.44253e+07	0	2.44253e+07	0	0	0	100	1
175	Argentina	CATAMARCA	Capayan		456829	2002	4	13517.3	994.82	12522.5	0	12964.8	954.16	12010.6	0	13517.3	12348.1	12348.1	80591744	1	12348.1	12348.1	1.04994	8.46164e+07	6.22744e+06	7.83889e+07	0	7.3596	0.0735958	92.6404	0.926404
176	Argentina	CATAMARCA	Capital		44028.7	2002	4	28.67	0	28.67	0	27.5	0	27.5	0	28.67	28.54	28.54	211962	1	28.54	28.54	0.96356	204238	0	204238	0	0	0	100	1
177	Argentina	CATAMARCA	El Alto		208303	2002	4	543.52	13.03	530.49	0	521.3	12.5	508.8	0	543.52	519.08	519.08	2.68243e+06	1	519.08	519.08	1.00428	2.6939e+06	64595.7	2.6293e+06	0	2.3973	0.0239734	97.6027	0.976027
178	Argentina	CATAMARCA	Fray Mamerto Esquiu		23767.5	2002	4	1006.13	9.19	996.94	0	965	8.81	956.19	0	1006.13	978.39	978.39	7.11917e+06	1	978.39	978.39	0.986314	7.02174e+06	64105.2	6.95763e+06	0	0.9134	0.00913401	99.0866	0.990866
179	Argentina	CATAMARCA	La Paz		789952	2002	4	6244.87	330.13	5914.74	0	5989.6	316.64	5672.96	0	6244.87	6060.98	6060.98	25906274	1	6060.98	6060.98	0.988223	2.56012e+07	1.35341e+06	2.42478e+07	0	5.2864	0.0528642	94.7136	0.947136
180	Argentina	CATAMARCA	Paclin		92277.8	2002	4	1352.9	0	1352.9	0	1297.6	0	1297.6	0	1352.9	1065.67	1065.67	6376588	1	1065.67	1065.67	1.21764	7.76437e+06	0	7.76437e+06	0	0	0	100	1
181	Argentina	CATAMARCA	Poman		521509	2002	4	7555.33	295.4	7259.93	0	7246.5	283.33	6963.17	0	7555.33	7259.93	7259.93	45073352	1	7259.93	7259.93	0.99815	4.499e+07	1.75906e+06	4.32309e+07	0	3.9098	0.0390982	96.0902	0.960902
182	Argentina	CATAMARCA	Santa Maria		577044	2002	4	2532.83	785.48	1747.35	0	2429.3	753.37	1675.93	0	2532.83	2441.75	2441.75	10251952	1	2441.75	2441.75	0.994901	1.01997e+07	3.16311e+06	7.03657e+06	0	31.012	0.31012	68.988	0.68988
183	Argentina	CATAMARCA	Santa Rosa		147143	2002	4	11856.8	649.83	11206.9	0	11372.1	623.27	10748.8	0	11856.8	11714	11714	56366836	1	11714	11714	0.970809	5.47214e+07	2.99911e+06	5.17223e+07	0	5.4807	0.0548067	94.5193	0.945193
184	Argentina	CATAMARCA	Tinogasta		2.25407e+06	2002	4	5508.78	4.2	5504.58	0	5283.6	4.03	5279.57	0	5509.84	5442.08	5442.08	46877032	0.999808	5441.03	5441.03	0.971066	4.55119e+07	34713.7	4.54772e+07	0	0.0762	0.000762419	99.9238	0.999238
185	Argentina	CATAMARCA	Valle Viejo		61329.4	2002	4	6667.75	1519.65	5148.1	0	6395.2	1457.53	4937.67	0	6667.75	6098.21	6098.21	36978036	1	6098.21	6098.21	1.0487	3.87789e+07	8.8381e+06	2.99408e+07	0	22.791	0.22791	77.209	0.77209
186	Argentina	CHACO	12 de Octubre		363656	2002	4	0.6	0.6	0	0	0.6	0.6	0	0	0.6	0.57	0.57	2240.27	1	0.57	0.57	1.05263	2358.18	2358.18	0	0	100	1	0	0
187	Argentina	CHACO	1ro. de Mayo		139984	2002	4	19.02	5.34	13.68	0	19	5.33	13.67	0	19.02	18.25	18.25	34705.8	1	18.25	18.25	1.0411	36132.1	10136	25996.1	0	28.0757	0.280757	71.9243	0.719243
188	Argentina	CHACO	25 de Mayo		223372	2002	4	0	0	0	0	0	0	0	0	0	0	0	0	1	0	0	1	0	0	0	0	-1	-1	-1	-1
189	Argentina	CHACO	9 de Julio		231080	2002	4	0	0	0	0	0	0	0	0	0	0	0	0	1	0	0	1	0	0	0	0	-1	-1	-1	-1
190	Argentina	CHACO	Almirante Brown		1.6835e+06	2002	4	0	0	0	0	0	0	0	0	0	0	0	0	1	0	0	1	0	0	0	0	-1	-1	-1	-1
191	Argentina	CHACO	Bermejo		260450	2002	4	4498.05	612.86	3885.19	0	4494.3	612.35	3881.95	0	4498.05	4356.8	4356.8	12014552	1	4356.8	4356.8	1.03156	1.23937e+07	1.68865e+06	1.07051e+07	0	13.625	0.13625	86.375	0.86375
192	Argentina	CHACO	Chacabuco		136221	2002	4	0.3	0.3	0	0	0.3	0.3	0	0	0.3	0.28	0.28	952.31	1	0.28	0.28	1.07143	1020.33	1020.33	0	0	100	1	0	0
193	Argentina	CHACO	Comandante Fernandez		147752	2002	4	9.41	4.71	4.7	0	9.4	4.7	4.7	0	9.41	9.4	9.4	24156.6	1	9.4	9.4	1	24156.6	12078.3	12078.3	0	50.0531	0.500531	49.9469	0.499469
194	Argentina	CHACO	Fray Justo Santa Maria de		295689	2002	4	0	0	0	0	0	0	0	0	0	0	0	0	1	0	0	1	0	0	0	0	-1	-1	-1	-1
195	Argentina	CHACO	General Belgrano		128709	2002	4	0	0	0	0	0	0	0	0	0	0	0	0	1	0	0	1	0	0	0	0	-1	-1	-1	-1
196	Argentina	CHACO	General Donovan		163025	2002	4	146.82	52.39	94.43	0	146.7	52.35	94.35	0	146.82	135.1	135.1	402739	1	135.1	135.1	1.08586	437319	156058	281262	0	35.6831	0.356831	64.3169	0.643169
197	Argentina	CHACO	General Guemes		2.65018e+06	2002	4	9.41	2.69	6.72	0	9.4	2.69	6.71	0	9.41	9.4	9.4	27144.4	1	9.4	9.4	1	27144.4	7767.92	19376.5	0	28.5866	0.285866	71.4134	0.714134
198	Argentina	CHACO	Independencia		187712	2002	4	1.6	0	1.6	0	1.6	0	1.6	0	1.6	1.59	1.59	5111.85	1	1.59	1.59	1.00629	5144	0	5144	0	0	0	100	1
199	Argentina	CHACO	Libertad		99471.7	2002	4	158.83	0	158.83	0	158.7	0	158.7	0	158.83	158.83	158.83	321142	1	158.83	158.83	0.999182	320880	0	320880	0	0	0	100	1
200	Argentina	CHACO	Libertador General San Ma		740140	2002	4	2613.08	564.52	2048.56	0	2610.9	564.05	2046.85	0	2613.08	2509.56	2509.56	4710105	1	2509.56	2509.56	1.04038	4.90031e+06	1.05865e+06	3.84166e+06	0	21.6036	0.216036	78.3964	0.783964
201	Argentina	CHACO	Maipu		281913	2002	4	9.21	6.69	2.52	0	9.2	6.68	2.52	0	9.21	9.2	9.2	24439.8	1	9.2	9.2	1	24439.8	17745.4	6694.37	0	72.6384	0.726384	27.3616	0.273616
202	Argentina	CHACO	Mayor Luis J. Fonta		378768	2002	4	8.01	4	4.01	0	8	4	4	0	8.01	7.99	7.99	32249.1	1	7.99	7.99	1.00125	32289.5	16144.7	16144.7	0	49.9376	0.499376	50.0624	0.500624
203	Argentina	CHACO	O. Higgins		157788	2002	4	1.3	0.65	0.65	0	1.3	0.65	0.65	0	1.3	1.29	1.29	3972.78	1	1.29	1.29	1.00775	4003.58	2001.79	2001.79	0	50	0.5	50	0.5
204	Argentina	CHACO	Presidente de la Plaza		234145	2002	4	5.5	4.5	1	0	5.5	4.5	1	0	5.5	5.5	5.5	14723.2	1	5.5	5.5	1	14723.2	12046.3	2676.95	0	81.8182	0.818182	18.1818	0.181818
205	Argentina	CHACO	Quitilipi		155347	2002	4	0	0	0	0	0	0	0	0	0	0	0	0	1	0	0	1	0	0	0	0	-1	-1	-1	-1
206	Argentina	CHACO	San Fernando		356398	2002	4	69.16	20.32	48.84	0	69.1	20.3	48.8	0	69.16	69.16	69.16	232784	1	69.16	69.16	0.999132	232582	68327.4	164255	0	29.3811	0.293811	70.6189	0.706189
207	Argentina	CHACO	San Lorenzo		216598	2002	4	0	0	0	0	0	0	0	0	0	0	0	0	1	0	0	1	0	0	0	0	-1	-1	-1	-1
208	Argentina	CHACO	Sargento Cabral		159933	2002	4	0	0	0	0	0	0	0	0	0	0	0	0	1	0	0	1	0	0	0	0	-1	-1	-1	-1
209	Argentina	CHACO	Tapenag		603216	2002	4	0	0	0	0	0	0	0	0	0	0	0	0	1	0	0	1	0	0	0	0	-1	-1	-1	-1
210	Argentina	CHUBUT	Biedma		1.28829e+06	2002	4	0	0	0	0	0	0	0	0	0	0	0	0	1	0	0	1	0	0	0	0	-1	-1	-1	-1
211	Argentina	CHUBUT	Cushamen		1.60869e+06	2002	4	3820.31	481.78	3338.53	0	2012.6	253.81	1758.79	0	3820.31	2339.4	2337.38	11654862	1	2339.4	2337.38	0.86105	1.00354e+07	1.26557e+06	8.76984e+06	0	12.611	0.12611	87.389	0.87389
212	Argentina	CHUBUT	Escalante		1.43209e+06	2002	4	11.39	1.71	9.68	0	6	0.9	5.1	0	11.39	11.39	11.39	127566	1	11.39	11.39	0.526778	67198.7	10079.8	57118.9	0	15.0132	0.150132	84.9868	0.849868
213	Argentina	CHUBUT	Florentino Ameghino		1.58619e+06	2002	4	0	0	0	0	0	0	0	0	0	0	0	0	1	0	0	1	0	0	0	0	-1	-1	-1	-1
214	Argentina	CHUBUT	Florentino Ameghino (Is.)		2131.5	2002	4	0	0	0	0	0	0	0	0	0	0	0	0	1	0	0	1	0	0	0	0	-1	-1	-1	-1
215	Argentina	CHUBUT	Futaleufu		930330	2002	4	882.09	30.18	851.91	0	464.7	15.9	448.8	0	882.09	401.05	401.05	1873878	1	401.05	401.05	1.15871	2.17128e+06	74291.6	2.09699e+06	0	3.4214	0.0342142	96.5786	0.965786
216	Argentina	CHUBUT	Gaiman		1.15992e+06	2002	4	21820.1	0	21820.1	0	11495.2	0	11495.2	0	21820.1	10771.2	10771.2	124060328	1	10771.2	10771.2	1.06722	1.324e+08	0	1.324e+08	0	0	0	100	1
217	Argentina	CHUBUT	Gastre		1.58885e+06	2002	4	13.29	0.7	12.59	0	7	0.37	6.63	0	13.29	13.29	13.29	139728	1	13.29	13.29	0.526712	73596.1	3890.08	69706.1	0	5.2671	0.0526712	94.7329	0.947329
218	Argentina	CHUBUT	Languineo		1.47606e+06	2002	4	241.07	36.29	204.78	0	127	19.12	107.88	0	241.07	241.07	241.07	1794197	1	241.07	241.07	0.526818	945215	142303	802912	0	15.0537	0.150537	84.9463	0.849463
219	Argentina	CHUBUT	Martines		1.56051e+06	2002	4	43.66	0	43.66	0	23	0	23	0	43.66	43.66	43.66	501146	1	43.66	43.66	0.526798	264002	0	264002	0	0	0	100	1
220	Argentina	CHUBUT	Paso de Indios		2.21804e+06	2002	4	111.99	16.38	95.61	0	59	8.63	50.37	0	111.99	111.99	111.99	1.2255e+06	1	111.99	111.99	0.526833	645633	94437.6	551196	0	14.6263	0.146263	85.3737	0.853737
221	Argentina	CHUBUT	Rawson		412178	2002	4	3023.82	49.47	2974.35	0	1593	26.06	1566.94	0	3023.82	1309.46	1309.46	15415771	1	1309.46	1309.46	1.21653	1.87538e+07	306794	1.8447e+07	0	1.636	0.0163601	98.364	0.98364
222	Argentina	CHUBUT	Rio Senguerr		2.26154e+06	2002	4	57.89	5.75	52.14	0	30.5	3.03	27.47	0	57.89	57.89	57.89	521520	1	57.89	57.89	0.526861	274768	27296.7	247472	0	9.9326	0.0993263	90.0674	0.900674
223	Argentina	CHUBUT	Sarmiento		1.45827e+06	2002	4	3612.64	390.4	3222.24	0	1903.2	205.67	1697.53	0	3612.64	2498.08	2498.08	27113832	1	2498.08	2498.08	0.761865	2.06571e+07	2.23232e+06	1.84248e+07	0	10.8065	0.108065	89.1935	0.891935
224	Argentina	CHUBUT	Tehuelches		1.46004e+06	2002	4	684.49	20.75	663.74	0	360.6	10.93	349.67	0	684.49	455.31	455.31	3.00553e+06	1	455.31	455.31	0.791988	2.38035e+06	72149.7	2.3082e+06	0	3.0315	0.0303145	96.9685	0.969685
225	Argentina	CHUBUT	Telsen		1.93649e+06	2002	4	126.23	14.26	111.97	0	66.5	7.51	58.99	0	126.23	122.58	122.58	1.44393e+06	1	122.58	122.58	0.542503	783336	88464	694872	0	11.2968	0.112968	88.7032	0.887032
226	Argentina	CORDOBA	Calamuchita		466914	2002	4	347	260.25	86.75	0	347	260.25	86.75	0	347.69	347.66	347.66	663608	0.998015	346.97	346.97	1.00009	662348	496761	165587	0	75	0.75	25	0.25
227	Argentina	CORDOBA	Capital		57719.4	2002	4	6844	174.93	6669.07	0	6844	174.93	6669.07	0	6857.6	6857.59	6857.59	12178551	0.998017	6843.99	6843.99	1	1.21544e+07	310662	1.18438e+07	0	2.556	0.0255596	97.444	0.97444
228	Argentina	CORDOBA	Colon		234867	2002	4	5611	604.78	5006.22	0	5611	604.78	5006.22	0	5622.15	5622.15	5622.15	10643468	0.998017	5611	5611	1	1.06224e+07	1.14493e+06	9.47743e+06	0	10.7785	0.107785	89.2215	0.892215
229	Argentina	CORDOBA	Cruz del Eje		654369	2002	4	6124.2	611	5513.2	0	6124.2	611	5513.2	0	6136.37	6136.31	6136.31	13096021	0.998017	6124.14	6124.14	1.00001	1.30702e+07	1.30399e+06	1.17662e+07	0	9.9768	0.0997681	90.0232	0.900232
230	Argentina	CORDOBA	General Roca		1.25801e+06	2002	4	0	0	0	0	0	0	0	0	0	0	0	0	1	0	0	1	0	0	0	0	-1	-1	-1	-1
231	Argentina	CORDOBA	General San Martin		489984	2002	4	4844.6	4152.51	692.09	0	4844.6	4152.51	692.09	0	4854.23	4854.23	4854.23	8496438	0.998016	4844.6	4844.6	1	8.47958e+06	7.26821e+06	1.21138e+06	0	85.7142	0.857142	14.2858	0.142858
232	Argentina	CORDOBA	Ischilin		504327	2002	4	1797.6	478.09	1319.51	0	1797.6	478.09	1319.51	0	1801.17	1801.16	1801.16	3551057	0.998018	1797.59	1797.59	1.00001	3.54404e+06	942573	2.60147e+06	0	26.596	0.26596	73.404	0.73404
233	Argentina	CORDOBA	Juarez Celman		777597	2002	4	7300	5677.78	1622.22	0	7300	5677.78	1622.22	0	7314.51	7314.5	7314.5	16361586	0.998016	7299.99	7299.99	1	1.63292e+07	1.27005e+07	3.6287e+06	0	77.7778	0.777778	22.2222	0.222222
234	Argentina	CORDOBA	Marcos Juarez		949811	2002	4	2743.2	2286	457.2	0	2743.2	2286	457.2	0	2748.55	2748.52	2748.52	5140911	0.998054	2743.17	2743.17	1.00001	5.13096e+06	4.2758e+06	855160	0	83.3333	0.833333	16.6667	0.166667
235	Argentina	CORDOBA	Minas		359184	2002	4	0	0	0	0	0	0	0	0	0	0	0	0	1	0	0	1	0	0	0	0	-1	-1	-1	-1
236	Argentina	CORDOBA	Pocho		312506	2002	4	698	279.2	418.8	0	698	279.2	418.8	0	699.39	699.38	699.38	2.02299e+06	0.998013	697.99	697.99	1.00001	2.01899e+06	807597	1.2114e+06	0	40	0.4	60	0.6
237	Argentina	CORDOBA	Presidente Roque S enz Pe		849875	2002	4	1.5	1.5	0	0	1.5	1.5	0	0	1.5	1.37	1.37	3786.3	1	1.37	1.37	1.09489	4145.58	4145.58	0	0	100	1	0	0
238	Argentina	CORDOBA	Punilla		261702	2002	4	115	28.75	86.25	0	115	28.75	86.25	0	115.23	115.22	115.22	259273	0.998004	114.99	114.99	1.00009	258778	64694.5	194084	0	25	0.25	75	0.75
239	Argentina	CORDOBA	Rio Cuarto		1.84347e+06	2002	4	4857	633.52	4223.48	0	4857	633.52	4223.48	0	4866.65	4866.65	4866.65	12284924	0.998017	4857	4857	1	1.22606e+07	1.5992e+06	1.06614e+07	0	13.0434	0.130434	86.9566	0.869566
240	Argentina	CORDOBA	Rio Primero		682297	2002	4	6144.4	3557.28	2587.12	0	6144.4	3557.28	2587.12	0	6156.61	6156.58	6156.58	9348152	0.998017	6144.37	6144.37	1	9.32966e+06	5.40137e+06	3.92828e+06	0	57.8947	0.578947	42.1053	0.421053
241	Argentina	CORDOBA	Rio Seco		614124	2002	4	0	0	0	0	0	0	0	0	0	0	0	0	1	0	0	1	0	0	0	0	-1	-1	-1	-1
242	Argentina	CORDOBA	Rio Segundo		489612	2002	4	6936.1	5740.22	1195.88	0	6936.1	5740.22	1195.88	0	6949.89	6949.89	6949.89	11628509	0.998016	6936.1	6936.1	1	1.16054e+07	9.6045e+06	2.00094e+06	0	82.7586	0.827586	17.2414	0.172414
243	Argentina	CORDOBA	San Alberto		328350	2002	4	4421.6	423.99	3997.61	0	4421.6	423.99	3997.61	0	4430.39	4430.36	4430.36	10440294	0.998016	4421.57	4421.57	1.00001	1.04197e+07	999147	9.4205e+06	0	9.5891	0.0958906	90.4109	0.904109
244	Argentina	CORDOBA	San Javier		158339	2002	4	11524.2	323.38	11200.8	0	11524.2	323.38	11200.8	0	11547.1	11547	11547	25846748	0.998016	11524.1	11524.1	1.00001	2.57956e+07	723850	2.50718e+07	0	2.8061	0.028061	97.1939	0.971939
245	Argentina	CORDOBA	San Justo		1.61759e+06	2002	4	2706.8	1714.31	992.49	0	2706.8	1714.31	992.49	0	2711.91	2711.83	2711.83	5363605	0.998116	2706.72	2706.72	1.00003	5.35366e+06	3.39066e+06	1.963e+06	0	63.3335	0.633335	36.6665	0.366665
246	Argentina	CORDOBA	Santa Maria		326649	2002	4	2042.8	499.35	1543.45	0	2042.8	499.35	1543.45	0	2046.86	2046.86	2046.86	3.54607e+06	0.998016	2042.8	2042.8	1	3.53903e+06	865095	2.67394e+06	0	24.4444	0.244444	75.5556	0.755556
247	Argentina	CORDOBA	Sobremonte		310455	2002	4	0	0	0	0	0	0	0	0	0	0	0	0	1	0	0	1	0	0	0	0	-1	-1	-1	-1
248	Argentina	CORDOBA	Tercero Arriba		503970	2002	4	11281.5	9871.31	1410.19	0	11281.5	9871.31	1410.19	0	11303.9	11303.9	11303.9	19648286	0.998016	11281.5	11281.5	1	1.96093e+07	1.71581e+07	2.45117e+06	0	87.5	0.875	12.5	0.125
249	Argentina	CORDOBA	Totoral		318975	2002	4	4922	1746.52	3175.48	0	4922	1746.52	3175.48	0	4931.78	4931.78	4931.78	9533572	0.998017	4922	4922	1	9.51467e+06	3.37618e+06	6.13849e+06	0	35.4839	0.354839	64.5161	0.645161
250	Argentina	CORDOBA	Tulumba		1.03694e+06	2002	4	1038.3	346.1	692.2	0	1038.3	346.1	692.2	0	1040.36	1040.33	1040.33	1659920	0.99802	1038.27	1038.27	1.00003	1.65668e+06	552227	1.10445e+06	0	33.3333	0.333333	66.6667	0.666667
251	Argentina	CORDOBA	Union		1069954	2002	4	1534	836.73	697.27	0	1534	836.73	697.27	0	1537.05	1537.02	1537.02	3.05299e+06	0.998016	1533.97	1533.97	1.00002	3.04699e+06	1.662e+06	1.38499e+06	0	54.5456	0.545456	45.4544	0.454544
252	Argentina	CORRIENTES	Bella Vista		189875	2002	4	2068.78	1176.4	892.38	0	1795.4	1020.94	774.46	0	2068.78	1890.37	1890.37	6473054	1	1890.37	1890.37	0.949761	6.14786e+06	3.49593e+06	2.65193e+06	0	56.8644	0.568644	43.1356	0.431356
253	Argentina	CORRIENTES	Beron de Astrada		74205.8	2002	4	3134.17	0	3134.17	0	2720	0	2720	0	3134.17	2987.73	2987.73	10560862	1	2987.73	2987.73	0.91039	9.6145e+06	0	9.6145e+06	0	0	0	100	1
254	Argentina	CORRIENTES	Capital		53658.7	2002	4	55.54	46.62	8.92	0	48.2	40.46	7.74	0	55.54	55.54	55.54	194260	1	55.54	55.54	0.867843	168587	141515	27071.9	0	83.9395	0.839395	16.0605	0.160605
255	Argentina	CORRIENTES	Concepcion		514340	2002	4	1182.34	784.66	397.68	0	1026.1	680.97	345.13	0	1182.34	917.17	917.17	3.58884e+06	1	917.17	917.17	1.11877	4.01507e+06	2.6646e+06	1.35047e+06	0	66.365	0.66365	33.635	0.33635
256	Argentina	CORRIENTES	Curuzu Cuatia		822704	2002	4	13971.2	3911.27	10059.9	0	12124.9	3394.4	8730.5	0	13971.2	10376.1	10376.1	41048192	1	10376.1	10376.1	1.16854	4.79663e+07	1.34283e+07	3.4538e+07	0	27.9953	0.279953	72.0047	0.720047
257	Argentina	CORRIENTES	Empedrado		206733	2002	4	1448.63	780.33	668.3	0	1257.2	677.21	579.99	0	1448.63	1367.79	1367.79	5.17723e+06	1	1367.79	1367.79	0.919147	4.75864e+06	2.56331e+06	2.19532e+06	0	53.8668	0.538668	46.1332	0.461332
258	Argentina	CORRIENTES	Esquina		385125	2002	4	262.83	148.76	114.07	0	228.1	129.1	99	0	262.83	229.27	229.27	874633	1	229.27	229.27	0.994897	870170	492498	377671	0	56.5993	0.565993	43.4007	0.434007
259	Argentina	CORRIENTES	Ganeral Paz		259226	2002	4	1981.9	122.85	1859.05	0	1720	106.62	1613.38	0	1981.9	1555.07	1555.07	6.18555e+06	1	1555.07	1555.07	1.10606	6.84159e+06	424099	6.41749e+06	0	6.1986	0.061986	93.8014	0.938014
260	Argentina	CORRIENTES	General Alvear		198278	2002	4	1048.56	0	1048.56	0	910	0	910	0	1048.56	782.38	782.38	2770017	1	782.38	782.38	1.16312	3.22186e+06	0	3.22186e+06	0	0	0	100	1
261	Argentina	CORRIENTES	Goya		484782	2002	4	1823.58	1223.9	599.68	0	1582.6	1062.17	520.43	0	1823.58	1651.84	1651.84	6395898	1	1651.84	1651.84	0.958083	6.1278e+06	4.11271e+06	2.0151e+06	0	67.1152	0.671152	32.8848	0.328848
262	Argentina	CORRIENTES	Itati		78285.4	2002	4	11.75	5.1	6.65	0	10.2	4.43	5.77	0	11.75	11.75	11.75	44847.6	1	11.75	11.75	0.868085	38931.5	16908.5	22023	0	43.4043	0.434043	56.5957	0.565957
263	Argentina	CORRIENTES	Ituzaingo		926053	2002	4	996.14	108.06	888.08	0	864.5	93.78	770.72	0	996.14	670.84	670.84	2.46275e+06	1	670.84	670.84	1.28868	3.1737e+06	344279	2.82942e+06	0	10.8479	0.108479	89.1521	0.891521
264	Argentina	CORRIENTES	Lavalle		151974	2002	4	2551.58	1468.5	1083.08	0	2214.4	1274.44	939.96	0	2551.58	2270.04	2270.04	8796343	1	2270.04	2270.04	0.975489	8.58074e+06	4.93842e+06	3.64232e+06	0	57.5526	0.575526	42.4474	0.424474
265	Argentina	CORRIENTES	Mburucuy		99653.8	2002	4	87.92	70.85	17.07	0	76.3	61.49	14.81	0	87.92	87.92	87.92	319155	1	87.92	87.92	0.867834	276974	223212	53761.2	0	80.5846	0.805846	19.4154	0.194154
266	Argentina	CORRIENTES	Mercedes		999096	2002	4	15801.9	1714.21	14087.7	0	13713.7	1487.68	12226	0	15801.9	12596.4	12596.4	50955620	1	12596.4	12596.4	1.0887	5.54755e+07	6.01805e+06	4.94574e+07	0	10.8481	0.108481	89.1519	0.891519
267	Argentina	CORRIENTES	Monte Caseros		260442	2002	4	3476.97	1861.86	1615.11	0	3017.5	1615.82	1401.68	0	3476.97	2886.84	2886.84	10236957	1	2886.84	2886.84	1.04526	1.07003e+07	5.72982e+06	4.97047e+06	0	53.5483	0.535483	46.4517	0.464517
268	Argentina	CORRIENTES	Paso de los Libres		501126	2002	4	9027.11	5764.79	3262.32	0	7834.2	5002.99	2831.21	0	9027.11	6819.99	6819.99	27662038	1	6819.99	6819.99	1.14871	3.17757e+07	2.02922e+07	1.14835e+07	0	63.8609	0.638609	36.1391	0.361391
269	Argentina	CORRIENTES	Saladas		189310	2002	4	581.55	349.41	232.14	0	504.7	303.24	201.46	0	581.55	513.4	513.4	1.8886e+06	1	513.4	513.4	0.983054	1.8566e+06	1.1155e+06	741095	0	60.0825	0.600825	39.9175	0.399175
270	Argentina	CORRIENTES	San Cosme		61010.2	2002	4	37.79	29.23	8.56	0	32.8	25.37	7.43	0	37.79	37.79	37.79	140494	1	37.79	37.79	0.867954	121943	94319.8	27623	0	77.3485	0.773485	22.6515	0.226515
271	Argentina	CORRIENTES	San Luis del Palmar		261634	2002	4	6.11	5.3	0.81	0	5.3	4.6	0.7	0	6.11	6.11	6.11	23578.8	1	6.11	6.11	0.86743	20452.9	17751.6	2701.33	0	86.743	0.86743	13.257	0.13257
272	Argentina	CORRIENTES	San Martin		670309	2002	4	2420.34	0	2420.34	0	2100.5	0	2100.5	0	2420.34	1740.87	1740.87	6.5285e+06	1	1740.87	1740.87	1.20658	7.87716e+06	0	7.87716e+06	0	0	0	100	1
273	Argentina	CORRIENTES	San Miguel		294635	2002	4	6.22	5.18	1.04	0	5.4	4.5	0.9	0	6.22	6.22	6.22	22077.8	1	6.22	6.22	0.868167	19167.2	15972.7	3194.53	0	83.2797	0.832797	16.7203	0.167203
274	Argentina	CORRIENTES	San Roque		248006	2002	4	199.69	152.91	46.78	0	173.3	132.7	40.6	0	199.69	177.66	177.66	648601	1	177.66	177.66	0.975459	632684	484461	148223	0	76.5737	0.765737	23.4263	0.234263
275	Argentina	CORRIENTES	Santo Tome		738014	2002	4	4722.8	1024.68	3698.12	0	4098.7	889.27	3209.43	0	4722.8	3635.89	3635.89	12320847	1	3635.89	3635.89	1.12729	1.38892e+07	3.01345e+06	1.08757e+07	0	21.6965	0.216965	78.3035	0.783035
276	Argentina	CORRIENTES	Sauce		242152	2002	4	1094.66	0	1094.66	0	950	0	950	0	1094.66	938.85	938.85	3.69962e+06	1	938.85	938.85	1.01188	3.74356e+06	0	3.74356e+06	0	0	0	100	1
277	Argentina	ENTRE RIOS	Colon		336205	2002	4	12907.3	7064.01	5843.31	0	8494.7	4649.04	3845.66	0	12907.3	7839.52	7839.52	25071038	1	7839.52	7839.52	1.08357	2.71663e+07	1.48678e+07	1.22985e+07	0	54.7287	0.547287	45.2713	0.452713
278	Argentina	ENTRE RIOS	Concordia		358308	2002	4	13227.2	8080.41	5146.77	0	8705.2	5317.96	3387.24	0	13227.2	5658.17	5658.17	19497166	1	5658.17	5658.17	1.53852	2.99968e+07	1.83249e+07	1.16719e+07	0	61.0894	0.610894	38.9106	0.389106
279	Argentina	ENTRE RIOS	Diamante		252589	2002	4	270.77	89.1	181.67	0	178.2	58.64	119.56	0	270.77	270.77	270.77	486046	1	270.77	270.77	0.658123	319878	105262	214616	0	32.9062	0.329062	67.0938	0.670938
280	Argentina	ENTRE RIOS	Federacion		366981	2002	4	13122.9	7536.8	5586.13	0	8636.6	4960.2	3676.4	0	13122.9	7061.49	7061.49	25939254	1	7061.49	7061.49	1.22306	3.17252e+07	1.82205e+07	1.35047e+07	0	57.4323	0.574323	42.5677	0.425677
281	Argentina	ENTRE RIOS	Federal		529368	2002	4	4023.52	1376.96	2646.56	0	2648	906.22	1741.78	0	4023.52	1819.58	1819.58	6.32013e+06	1	1819.58	1819.58	1.45528	9.19756e+06	3.14766e+06	6.0499e+06	0	34.2228	0.342228	65.7772	0.657772
282	Argentina	ENTRE RIOS	Feliciano		293277	2002	4	5335.57	250.82	5084.75	0	3511.5	165.07	3346.43	0	5335.57	2814.52	2814.52	10029800	1	2814.52	2814.52	1.24764	1.25136e+07	588242	1.19253e+07	0	4.7009	0.047009	95.2991	0.952991
283	Argentina	ENTRE RIOS	Gualeguay		668934	2002	4	7075.19	3755.17	3320.02	0	4656.4	2471.39	2185.01	0	7075.19	6159.13	6159.13	15821086	1	6159.13	6159.13	0.756016	1.1961e+07	6.34831e+06	5.61268e+06	0	53.0752	0.530752	46.9248	0.469248
284	Argentina	ENTRE RIOS	Gualeguaychu		722964	2002	4	5483.56	2591	2892.56	0	3608.9	1705.22	1903.68	0	5483.56	4215.82	4215.82	8.12118e+06	1	4215.82	4215.82	0.856037	6.95203e+06	3.28486e+06	3.66717e+06	0	47.2503	0.472503	52.7497	0.527497
285	Argentina	ENTRE RIOS	Islas del Ibicuy		481502	2002	4	0	0	0	0	0	0	0	0	0	0	0	0	1	0	0	1	0	0	0	0	-1	-1	-1	-1
286	Argentina	ENTRE RIOS	La Paz		653776	2002	4	8993.66	1044.53	7949.13	0	5919	687.44	5231.56	0	8993.66	5824.38	5824.38	15811474	1	5824.38	5824.38	1.01625	1.60683e+07	1.8662e+06	1.42021e+07	0	11.6141	0.116141	88.3859	0.883859
287	Argentina	ENTRE RIOS	Nogoya		421224	2002	4	1438.92	582.77	856.15	0	947	383.54	563.46	0	1438.92	1425.25	1425.25	4315755	1	1425.25	1425.25	0.664445	2.86758e+06	1.16139e+06	1.7062e+06	0	40.5005	0.405005	59.4995	0.594995
288	Argentina	ENTRE RIOS	Parana		519756	2002	4	3902.11	1958.71	1943.4	0	2568.1	1289.09	1279.01	0	3902.11	3902.11	3902.11	9179686	1	3902.11	3902.11	0.658131	6.04144e+06	3.03258e+06	3.00886e+06	0	50.1962	0.501962	49.8038	0.498038
289	Argentina	ENTRE RIOS	Tala		278512	2002	4	1396.38	656.44	739.94	0	919	432.02	486.98	0	1396.38	1254.97	1254.97	3.52834e+06	1	1254.97	1254.97	0.732288	2.58376e+06	1.21462e+06	1.36914e+06	0	47.0101	0.470101	52.9899	0.529899
290	Argentina	ENTRE RIOS	Uruguay		515348	2002	4	3635.91	1766.19	1869.72	0	2392.9	1162.38	1230.52	0	3635.91	3024.37	3024.37	7841680	1	3024.37	3024.37	0.791206	6.20439e+06	3.01385e+06	3.19053e+06	0	48.5763	0.485763	51.4237	0.514237
291	Argentina	ENTRE RIOS	Victoria		666033	2002	4	3686.2	1732.86	1953.34	0	2426	1140.45	1285.55	0	3686.2	3686.2	3686.2	9396208	1	3686.2	3686.2	0.65813	6.18393e+06	2.90703e+06	3.2769e+06	0	47.0094	0.470094	52.9906	0.529906
292	Argentina	ENTRE RIOS	Villaguay		724417	2002	4	24500.8	13101.3	11399.5	0	16124.7	8622.37	7502.33	0	24500.8	16899	16899	52417008	1	16899	16899	0.954178	5.00152e+07	2.67446e+07	2.32705e+07	0	53.4731	0.534731	46.5269	0.465269
293	Argentina	FORMOSA	Bermejo		1.39599e+06	2002	4	2998.01	173.67	2824.34	0	1042	60.36	981.64	0	2998.01	1104.67	1104.67	5574843	1	1104.67	1104.67	0.943268	5.25857e+06	304614	4.95396e+06	0	5.7928	0.0579284	94.2072	0.942072
294	Argentina	FORMOSA	Formosa		652995	2002	4	108.76	10.59	98.17	0	37.8	3.68	34.12	0	108.76	36.76	36.76	61798.6	1	36.76	36.76	1.02829	63547	6186.59	57360.4	0	9.737	0.0973704	90.263	0.90263
295	Argentina	FORMOSA	Laishi		355876	2002	4	5921.5	0	5921.5	0	2058.1	0	2058.1	0	5921.5	1876.29	1876.29	4686679	1	1876.29	1876.29	1.0969	5.14081e+06	0	5.14081e+06	0	0	0	100	1
296	Argentina	FORMOSA	Matacos		409685	2002	4	0	0	0	0	0	0	0	0	0	0	0	0	1	0	0	1	0	0	0	0	-1	-1	-1	-1
297	Argentina	FORMOSA	Patino		2.62369e+06	2002	4	1238.62	197.4	1041.22	0	430.5	68.61	361.89	0	1238.62	801.33	801.33	2.60148e+06	1	801.33	801.33	0.537232	1.3976e+06	222739	1.17486e+06	0	15.9371	0.159371	84.0629	0.840629
298	Argentina	FORMOSA	Pilagas		344009	2002	4	741.74	0	741.74	0	257.8	0	257.8	0	741.74	85.14	85.14	86749.3	1	85.14	85.14	3.02795	262673	0	262673	0	0	0	100	1
299	Argentina	FORMOSA	Pilcomayo		539470	2002	4	431	82.89	348.11	0	149.8	28.81	120.99	0	431	352.98	352.98	334312	1	352.98	352.98	0.424387	141877	27286.3	114591	0	19.232	0.19232	80.768	0.80768
300	Argentina	FORMOSA	Pirane		861606	2002	4	70.49	12.43	58.06	0	24.5	4.32	20.18	0	70.49	69.87	69.87	81907.8	1	69.87	69.87	0.350651	28721.1	5064.29	23656.8	0	17.6337	0.176337	82.3663	0.823663
301	Argentina	FORMOSA	Ramon Lista		385948	2002	4	2.88	0	2.88	0	1	0	1	0	2.88	0.33	0.33	2362.8	1	0.33	0.33	3.0303	7160	0	7160	0	0	0	100	1
302	Argentina	JUJUY	Capital		204278	2002	4	569.26	28.82	540.44	0	428.1	21.67	406.43	0	569.26	447.05	447.05	1628257	1	447.05	447.05	0.957611	1.55924e+06	78927	1.48031e+06	0	5.0627	0.0506271	94.9373	0.949373
303	Argentina	JUJUY	Cochinoca		725194	2002	4	12.23	0	12.23	0	9.2	0	9.2	0	12.23	12.23	12.23	91346.5	1	12.23	12.23	0.752249	68715.3	0	68715.3	0	0	0	100	1
304	Argentina	JUJUY	El Carmen		93636	2002	4	28833.9	27.29	28806.6	0	21683.8	20.52	21663.3	0	28833.9	21353	21353	63670740	1	21353	21353	1.01549	6.46572e+07	61186.9	6.4596e+07	0	0.0946	0.000946456	99.9054	0.999054
305	Argentina	JUJUY	Humahuaca		376133	2002	4	815.66	6.97	808.69	0	613.4	5.24	608.16	0	815.66	815.66	815.66	5651609	1	815.66	815.66	0.752029	4.25017e+06	36307.3	4.21387e+06	0	0.8545	0.00854523	99.1455	0.991455
306	Argentina	JUJUY	Ledesma		280132	2002	4	52518.2	4416.37	48101.8	0	39495	3321.22	36173.8	0	52518.2	41739.9	41739.9	171161040	1	41739.9	41739.9	0.946216	1.61955e+08	1.36192e+07	1.48336e+08	0	8.4092	0.0840922	91.5908	0.915908
307	Argentina	JUJUY	Palpala		46075.6	2002	4	2583.82	227.12	2356.7	0	1943.1	170.8	1772.3	0	2583.82	2109.96	2109.96	5517934	1	2109.96	2109.96	0.920918	5.08156e+06	446673	4.63489e+06	0	8.7901	0.0879009	91.2099	0.912099
308	Argentina	JUJUY	Rinconada		704937	2002	4	1.86	0.7	1.16	0	1.4	0.53	0.87	0	1.86	1.86	1.86	16831.4	1	1.86	1.86	0.752688	12668.8	4796.04	7872.74	0	37.6344	0.376344	62.3656	0.623656
309	Argentina	JUJUY	San Antonio		73162.9	2002	4	1181.34	0	1181.34	0	888.4	0	888.4	0	1181.34	1008.79	1008.79	3.69135e+06	1	1008.79	1008.79	0.880659	3.25082e+06	0	3.25082e+06	0	0	0	100	1
310	Argentina	JUJUY	San Pedro		201788	2002	4	24458.1	301.53	24156.6	0	18393.1	226.76	18166.3	0	24458.1	15123.6	15123.6	54268516	1	15123.6	15123.6	1.21619	6.60007e+07	813693	6.51871e+07	0	1.2328	0.0123284	98.7672	0.987672
311	Argentina	JUJUY	Santa Barbara		435431	2002	4	7514.64	276.28	7238.36	0	5651.2	207.77	5443.43	0	7514.64	6159	6159	23006384	1	6159	6159	0.917552	2.11095e+07	776106	2.03334e+07	0	3.6766	0.0367656	96.3234	0.963234
312	Argentina	JUJUY	Santa Catalina		286564	2002	4	6.78	0	6.78	0	5.1	0	5.1	0	6.78	6.78	6.78	57970.7	1	6.78	6.78	0.752212	43606.3	0	43606.3	0	0	0	100	1
313	Argentina	JUJUY	Susques		940557	2002	4	0	0	0	0	0	0	0	0	0	0	0	0	1	0	0	1	0	0	0	0	-1	-1	-1	-1
314	Argentina	JUJUY	Tilcara		201683	2002	4	1033.61	0	1033.61	0	777.3	0	777.3	0	1033.61	1033.61	1033.61	6358628	1	1033.61	1033.61	0.752024	4.78184e+06	0	4.78184e+06	0	0	0	100	1
315	Argentina	JUJUY	Tumbaya		338738	2002	4	415.41	5.19	410.22	0	312.4	3.9	308.5	0	415.41	415.41	415.41	3.07306e+06	1	415.41	415.41	0.752028	2.31103e+06	28850.9	2.28218e+06	0	1.2494	0.0124937	98.7506	0.987506
316	Argentina	JUJUY	Valle Grande		111072	2002	4	7.05	0	7.05	0	5.3	0	5.3	0	7.05	7.05	7.05	47236.2	1	7.05	7.05	0.751773	35510.9	0	35510.9	0	0	0	100	1
317	Argentina	JUJUY	Yavi		308404	2002	4	48.14	1.4	46.74	0	36.2	1.05	35.15	0	48.14	48.14	48.14	387030	1	48.14	48.14	0.751973	291036	8441.66	282595	0	2.9082	0.0290818	97.0918	0.970918
318	Argentina	LA PAMPA	Atreuco		348912	2002	4	0	0	0	0	0	0	0	0	0	0	0	0	1	0	0	1	0	0	0	0	-1	-1	-1	-1
319	Argentina	LA PAMPA	Caleu Caleu		882154	2002	4	57.82	0	57.82	0	40	0	40	0	57.82	34.31	34.31	245531	1	34.31	34.31	1.16584	286250	0	286250	0	0	0	100	1
320	Argentina	LA PAMPA	Capital		251863	2002	4	21.39	14.8	6.59	0	14.8	10.24	4.56	0	21.39	21.39	21.39	103478	1	21.39	21.39	0.691912	71597.6	49537.8	22059.8	0	69.1912	0.691912	30.8088	0.308088
321	Argentina	LA PAMPA	Catrilo		243479	2002	4	0.29	0.2	0.09	0	0.2	0.14	0.06	0	0.29	0.27	0.27	1196.3	1	0.27	0.27	0.740741	886.15	620.3	265.84	0	68.9655	0.689655	31.0345	0.310345
322	Argentina	LA PAMPA	Chalileo		885438	2002	4	0	0	0	0	0	0	0	0	0	0	0	0	1	0	0	1	0	0	0	0	-1	-1	-1	-1
323	Argentina	LA PAMPA	Chapaleufu		254698	2002	4	0	0	0	0	0	0	0	0	0	0	0	0	1	0	0	1	0	0	0	0	-1	-1	-1	-1
324	Argentina	LA PAMPA	Chical Co		914444	2002	4	0	0	0	0	0	0	0	0	0	0	0	0	1	0	0	1	0	0	0	0	-1	-1	-1	-1
325	Argentina	LA PAMPA	Conhello		513924	2002	4	0	0	0	0	0	0	0	0	0	0	0	0	1	0	0	1	0	0	0	0	-1	-1	-1	-1
326	Argentina	LA PAMPA	Curaco		1.34847e+06	2002	4	67.94	0	67.94	0	47	0	47	0	67.94	67.93	67.93	433883	1	67.93	67.93	0.691889	300199	0	300199	0	0	0	100	1
327	Argentina	LA PAMPA	Guatrache		343555	2002	4	15.9	11	4.9	0	11	7.61	3.39	0	15.9	15.89	15.89	88806.6	1	15.89	15.89	0.692259	61477.2	42531.1	18946.2	0	69.1824	0.691824	30.8176	0.308176
328	Argentina	LA PAMPA	Hucal		584613	2002	4	0	0	0	0	0	0	0	0	0	0	0	0	1	0	0	1	0	0	0	0	-1	-1	-1	-1
329	Argentina	LA PAMPA	Lihuel Calel		1.22663e+06	2002	4	138.76	0	138.76	0	96	0	96	0	138.76	106.35	106.35	711576	1	106.35	106.35	0.90268	642326	0	642326	0	0	0	100	1
330	Argentina	LA PAMPA	Limay Mahuida		1.01517e+06	2002	4	0	0	0	0	0	0	0	0	0	0	0	0	1	0	0	1	0	0	0	0	-1	-1	-1	-1
331	Argentina	LA PAMPA	Loventue		909091	2002	4	246.59	85.29	161.3	0	170.6	59.01	111.59	0	246.59	246.59	246.59	1.18497e+06	1	246.59	246.59	0.691837	819805	283568	536237	0	34.5878	0.345878	65.4122	0.654122
332	Argentina	LA PAMPA	Maraco		249246	2002	4	7.95	0	7.95	0	5.5	0	5.5	0	7.95	7.94	7.94	27721.9	1	7.94	7.94	0.692695	19202.8	0	19202.8	0	0	0	100	1
333	Argentina	LA PAMPA	Pulen		1.32174e+06	2002	4	6039.38	0	6039.38	0	4178.2	0	4178.2	0	6039.38	3565.37	3565.37	23273374	1	3565.37	3565.37	1.17188	2.72737e+07	0	2.72737e+07	0	0	0	100	1
334	Argentina	LA PAMPA	Quemu Quemu		246841	2002	4	74.44	25.74	48.7	0	51.5	17.81	33.69	0	74.44	74.44	74.44	295852	1	74.44	74.44	0.691832	204680	70783.4	133896	0	34.5782	0.345782	65.4218	0.654218
335	Argentina	LA PAMPA	Rancul		506893	2002	4	144.54	87.5	57.04	0	100	60.54	39.46	0	144.54	144.54	144.54	490141	1	144.54	144.54	0.69185	339104	205294	133811	0	60.5369	0.605369	39.4631	0.394631
336	Argentina	LA PAMPA	Realico		255295	2002	4	0	0	0	0	0	0	0	0	0	0	0	0	1	0	0	1	0	0	0	0	-1	-1	-1	-1
337	Argentina	LA PAMPA	Toay		509782	2002	4	0	0	0	0	0	0	0	0	0	0	0	0	1	0	0	1	0	0	0	0	-1	-1	-1	-1
338	Argentina	LA PAMPA	Trenel		197643	2002	4	0	0	0	0	0	0	0	0	0	0	0	0	1	0	0	1	0	0	0	0	-1	-1	-1	-1
339	Argentina	LA PAMPA	Ultracan		1.27944e+06	2002	4	0	0	0	0	0	0	0	0	0	0	0	0	1	0	0	1	0	0	0	0	-1	-1	-1	-1
340	Argentina	LA RIOJA	Arauco		245770	2002	4	9965.48	2717.56	7247.92	0	9964.4	2717.27	7247.13	0	10109.5	10109.1	10109.1	70790616	0.985755	9965.13	9965.13	0.999927	6.97771e+07	1.90281e+07	5.0749e+07	0	27.2697	0.272697	72.7303	0.727303
341	Argentina	LA RIOJA	Capital		1.35113e+06	2002	4	10639.5	5728.37	4911.18	0	10638.4	5727.75	4910.65	0	10801.5	10797.4	10797.4	76100424	0.985005	10635.5	10635.5	1.00028	7.49799e+07	4.03694e+07	3.46105e+07	0	53.8403	0.538403	46.1597	0.461597
342	Argentina	LA RIOJA	Castro Barros		152968	2002	4	867.59	12.95	854.64	0	867.5	12.95	854.55	0	880.8	880.8	880.8	6958225	0.985002	867.59	867.59	0.999896	6.85316e+06	102304	6.75085e+06	0	1.4926	0.0149264	98.5074	0.985074
343	Argentina	LA RIOJA	Chamical		556103	2002	4	238.73	38.65	200.08	0	238.7	38.65	200.05	0	242.36	242.36	242.36	647803	0.985022	238.73	238.73	0.999874	638020	103307	534713	0	16.1898	0.161898	83.8102	0.838102
344	Argentina	LA RIOJA	Chilecito		524530	2002	4	12655.9	2657.45	9998.42	0	12654.5	2657.16	9997.34	0	12848.5	12848.5	12848.5	100763880	0.985005	12655.9	12655.9	0.999893	9.92422e+07	2.08386e+07	7.84036e+07	0	20.9978	0.209978	79.0022	0.790022
345	Argentina	LA RIOJA	Coronel Felipe Varela		814790	2002	4	1315.84	3.34	1312.5	0	1315.7	3.34	1312.36	0	1335.87	1335.87	1335.87	12892399	0.985006	1315.84	1315.84	0.999894	1.26977e+07	32234.1	1.26655e+07	0	0.2538	0.0025383	99.7462	0.997462
346	Argentina	LA RIOJA	Famatina		420978	2002	4	2173.63	5.71	2167.92	0	2173.4	5.71	2167.69	0	2206.72	2206.72	2206.72	24901412	0.985005	2173.63	2173.63	0.999894	2.45254e+07	64433.7	2.4461e+07	0	0.2627	0.00262694	99.7373	0.997373
347	Argentina	LA RIOJA	General Angel V. Pesaloza		313145	2002	4	42.4	14.13	28.27	0	42.4	14.13	28.27	0	43.05	43.05	43.05	137213	0.984901	42.4	42.4	1	135141	45036.4	90104.6	0	33.3255	0.333255	66.6745	0.666745
348	Argentina	LA RIOJA	General Belgrano		278101	2002	4	133.51	16.69	116.82	0	133.5	16.69	116.81	0	135.54	135.54	135.54	777559	0.985023	133.51	133.51	0.999925	765856	95746.4	670110	0	12.5009	0.125009	87.4991	0.874991
349	Argentina	LA RIOJA	General Juan F. Quiroga		394663	2002	4	29.4	0.73	28.67	0	29.4	0.73	28.67	0	29.84	29.83	29.83	158288	0.985255	29.39	29.39	1.00034	156007	3873.64	152133	0	2.483	0.0248299	97.517	0.97517
350	Argentina	LA RIOJA	General Lamadrid		609599	2002	4	396.34	16.18	380.16	0	396.3	16.18	380.12	0	402.37	402.37	402.37	2.43327e+06	0.985014	396.34	396.34	0.999899	2.39656e+06	97846.1	2.29872e+06	0	4.0824	0.0408235	95.9176	0.959176
351	Argentina	LA RIOJA	General Ocampo		372460	2002	4	419.85	41.98	377.87	0	419.8	41.98	377.82	0	426.24	426.24	426.24	2.91752e+06	0.985008	419.85	419.85	0.999881	2.87344e+06	287344	2.5861e+06	0	9.9988	0.0999881	90.0012	0.900012
352	Argentina	LA RIOJA	General San Martin		453454	2002	4	16	0	16	0	16	0	16	0	16.24	16.24	16.24	78563.4	0.985222	16	16	1	77402.3	0	77402.3	0	0	0	100	1
353	Argentina	LA RIOJA	Independencia		686084	2002	4	44	0	44	0	44	0	44	0	44.67	44.67	44.67	140669	0.985001	44	44	1	138559	0	138559	0	0	0	100	1
354	Argentina	LA RIOJA	Rosario Vera Penaloza		503544	2002	4	1.5	0.75	0.75	0	1.5	0.75	0.75	0	1.52	1.51	1.51	5191.47	0.986842	1.49	1.49	1.00671	5157.54	2578.77	2578.77	0	50	0.5	50	0.5
355	Argentina	LA RIOJA	San Blas de los Sauces		147649	2002	4	906.3	35.82	870.48	0	906.2	35.82	870.38	0	917.59	915.04	915.04	6.72098e+06	0.987696	903.78	903.78	1.00268	6.65606e+06	263099	6.39296e+06	0	3.9523	0.0395233	96.0477	0.960477
356	Argentina	LA RIOJA	Sanagasta		130585	2002	4	268.13	1.58	266.55	0	268.1	1.58	266.52	0	272.21	272.21	272.21	1.28009e+06	0.985012	268.13	268.13	0.999888	1.26076e+06	7430.06	1.25333e+06	0	0.5893	0.00589266	99.4107	0.994107
357	Argentina	LA RIOJA	Vinchina		1.15542e+06	2002	4	1702.88	0	1702.88	0	1702.7	0	1702.7	0	1728.8	1728.8	1728.8	18549128	0.985007	1702.88	1702.88	0.999894	1.82691e+07	0	1.82691e+07	0	0	0	100	1
358	Argentina	MENDOZA	Capital		7283.09	2002	4	2.15	0	2.15	0	1.6	0	1.6	0	2.15	2.11	2.11	4671.48	1	2.11	2.11	0.758294	3542.35	0	3542.35	0	0	0	100	1
359	Argentina	MENDOZA	General Alvear		1.43747e+06	2002	4	21811.6	3102.89	18708.7	0	16252.2	2312.02	13940.2	0	21811.6	14289.2	14289.2	86303984	1	14289.2	14289.2	1.13738	9.81603e+07	1.39642e+07	8.41961e+07	0	14.2259	0.142259	85.7741	0.857741
360	Argentina	MENDOZA	Godoy Cruz		7515.4	2002	4	0	0	0	0	0	0	0	0	0	0	0	0	1	0	0	1	0	0	0	0	-1	-1	-1	-1
361	Argentina	MENDOZA	Guaymallen		17521.7	2002	4	6745.25	1940.68	4804.57	0	5026	1446.03	3579.97	0	6745.25	5463.04	5463.04	27265854	1	5463.04	5463.04	0.920001	2.50846e+07	7.21709e+06	1.78675e+07	0	28.7711	0.287711	71.2289	0.712289
362	Argentina	MENDOZA	Junin		25778.7	2002	4	18548.5	4172.44	14376	0	13820.8	3108.96	10711.8	0	18548.5	15777.4	15777.4	64641400	1	15777.4	15777.4	0.875986	5.66249e+07	1.27377e+07	4.38873e+07	0	22.4948	0.224948	77.5052	0.775052
363	Argentina	MENDOZA	La Paz		724115	2002	4	945.49	171.68	773.81	0	704.5	127.92	576.58	0	945.49	945.49	945.49	4.13925e+06	1	945.49	945.49	0.745116	3.08422e+06	560019	2.5242e+06	0	18.1578	0.181578	81.8422	0.818422
364	Argentina	MENDOZA	Las Heras		887973	2002	4	5657.63	1340.38	4317.25	0	4215.6	998.74	3216.86	0	5657.63	3326.26	3326.26	20358980	1	3326.26	3326.26	1.26737	2.58023e+07	6.11297e+06	1.96894e+07	0	23.6915	0.236915	76.3085	0.763085
365	Argentina	MENDOZA	Lavalle		1.03114e+06	2002	4	27591.4	6636.49	20954.9	0	20558.8	4944.96	15613.8	0	27591.4	17470.5	17470.5	104564064	1	17470.5	17470.5	1.17677	1.23048e+08	2.95965e+07	9.34517e+07	0	24.0528	0.240528	75.9472	0.759472
366	Argentina	MENDOZA	Lujan de Cuyo		485329	2002	4	20859.8	6939.91	13919.9	0	15543	5171.05	10372	0	20859.8	13429.1	13429.1	57927040	1	13429.1	13429.1	1.15742	6.70456e+07	2.23056e+07	4.474e+07	0	33.2693	0.332693	66.7307	0.667307
367	Argentina	MENDOZA	Maipu		65895	2002	4	33295.2	11174.3	22120.8	0	24808.8	8326.17	16482.6	0	33295.2	27707.8	27707.8	129513832	1	27707.8	27707.8	0.895372	1.15963e+08	3.89188e+07	7.70443e+07	0	33.5613	0.335613	66.4387	0.664387
368	Argentina	MENDOZA	Malargue		4.061e+06	2002	4	4155.45	43.6	4111.85	0	3096.3	32.49	3063.81	0	4219.58	3147.32	3147.32	17980586	0.984802	3099.49	3099.49	0.998971	1.76891e+07	185615	1.75035e+07	0	1.0492	0.0104922	98.9508	0.989508
369	Argentina	MENDOZA	Rivadavia		211253	2002	4	25387.8	5834.02	19553.8	0	18916.9	4347.03	14569.9	0	25387.8	20866.9	20866.9	75558944	1	20866.9	20866.9	0.906549	6.84979e+07	1.57405e+07	5.27573e+07	0	22.9796	0.229796	77.0204	0.770204
370	Argentina	MENDOZA	San Carlos		1.16092e+06	2002	4	22403.6	3054.61	19349	0	16693.3	2276.04	14417.3	0	22403.6	13784.1	13784.1	75474264	1	13784.1	13784.1	1.21106	9.14037e+07	1.24624e+07	7.89413e+07	0	13.6345	0.136345	86.3655	0.863655
371	Argentina	MENDOZA	San Martin		149167	2002	4	48043.2	14644.9	33398.2	0	35797.8	10912.2	24885.6	0	48043.2	42956.6	42956.6	163713920	1	42956.6	42956.6	0.833348	1.36431e+08	4.15879e+07	9.48427e+07	0	30.4828	0.304828	69.5172	0.695172
372	Argentina	MENDOZA	San Rafael		3.17962e+06	2002	4	66674.3	2875.57	63798.8	0	49680.2	2142.64	47537.6	0	66674.3	47003.4	47003.4	251302256	1	47003.4	47003.4	1.05695	2.65614e+08	1.14556e+07	2.54158e+08	0	4.3129	0.0431286	95.6871	0.956871
373	Argentina	MENDOZA	Sata Rosa		846893	2002	4	17349	5902.36	11446.6	0	12927	4397.95	8529.05	0	17349	13144.7	13144.7	58349228	1	13144.7	13144.7	0.98344	5.7383e+07	1.95225e+07	3.78605e+07	0	34.0214	0.340214	65.9786	0.659786
374	Argentina	MENDOZA	Tunuyan		327092	2002	4	19548.5	4040.18	15508.3	0	14565.9	3010.41	11555.5	0	19548.5	11250.1	11250.1	75487040	1	11250.1	11250.1	1.29473	9.77354e+07	2.01995e+07	7.75359e+07	0	20.6675	0.206675	79.3325	0.793325
375	Argentina	MENDOZA	Tupungato		249833	2002	4	20504.3	7927.92	12576.4	0	15278.1	5907.23	9370.87	0	20504.3	17425.2	17425.2	86077376	1	17425.2	17425.2	0.876782	7.54711e+07	2.91807e+07	4.62905e+07	0	38.6647	0.386647	61.3353	0.613353
376	Argentina	MISIONES	25 de Mayo		168139	2002	4	2.55	0.99	1.56	0	2.5	0.97	1.53	0	2.55	1.73	1.73	1681.17	1	1.73	1.73	1.44509	2429.44	942.62	1486.82	0	38.8235	0.388235	61.1765	0.611765
377	Argentina	MISIONES	Apostoles		104441	2002	4	54.12	34.78	19.34	0	53	34.06	18.94	0	54.12	17.97	17.97	16168.5	1	17.97	17.97	2.94936	47686.7	30645.5	17041.3	0	64.2646	0.642646	35.7354	0.357354
378	Argentina	MISIONES	Cainguas		155522	2002	4	0.1	0.02	0.08	0	0.1	0.02	0.08	0	0.1	0.09	0.09	80.71	1	0.09	0.09	1.11111	89.68	17.94	71.74	0	20	0.2	80	0.8
379	Argentina	MISIONES	Candelaria		90603.6	2002	4	14.19	0.75	13.44	0	13.9	0.73	13.17	0	14.19	3.81	3.81	2634.34	1	3.81	3.81	3.64829	9610.85	504.74	9106.11	0	5.2854	0.0528541	94.7146	0.947146
380	Argentina	MISIONES	Capital		97940.2	2002	4	11.84	2.9	8.94	0	11.6	2.84	8.76	0	11.84	8.55	8.55	15623	1	8.55	8.55	1.35673	21196.2	5189.41	16006.8	0	24.4932	0.244932	75.5068	0.755068
381	Argentina	MISIONES	Concepcion		77850.3	2002	4	0	0	0	0	0	0	0	0	0	0	0	0	1	0	0	1	0	0	0	0	-1	-1	-1	-1
382	Argentina	MISIONES	Eldorado		187827	2002	4	0	0	0	0	0	0	0	0	0	0	0	0	1	0	0	1	0	0	0	0	-1	-1	-1	-1
383	Argentina	MISIONES	General Manuel Belgrano		347289	2002	4	6.13	0.58	5.55	0	6	0.57	5.43	0	6.13	6.09	6.09	7856.99	1	6.09	6.09	0.985222	7740.88	735.38	7005.5	0	9.4617	0.0946166	90.5383	0.905383
384	Argentina	MISIONES	Guarani		329228	2002	4	5.31	0.6	4.71	0	5.2	0.59	4.61	0	5.31	4.79	4.79	4543.71	1	4.79	4.79	1.08559	4932.63	559.66	4372.97	0	11.2994	0.112994	88.7006	0.887006
385	Argentina	MISIONES	Iguazu		267694	2002	4	11.23	6.6	4.63	0	11	6.46	4.54	0	11.23	11.1	11.1	10238.9	1	11.1	11.1	0.990991	10146.6	5958.83	4187.78	0	58.7711	0.587711	41.2289	0.412289
386	Argentina	MISIONES	Leandro N. Alem		106983	2002	4	28.59	5.75	22.84	0	28	5.63	22.37	0	28.59	13.49	13.49	8279.75	1	13.49	13.49	2.07561	17185.5	3455.52	13730	0	20.1119	0.201119	79.8881	0.798881
387	Argentina	MISIONES	Libertador General San Ma		142833	2002	4	19.6	4.43	15.17	0	19.2	4.34	14.86	0	19.6	10.17	10.17	7754.96	1	10.17	10.17	1.88791	14640.6	3309.39	11331.2	0	22.602	0.22602	77.398	0.77398
388	Argentina	MISIONES	Montecarlo		174078	2002	4	0	0	0	0	0	0	0	0	0	0	0	0	1	0	0	1	0	0	0	0	-1	-1	-1	-1
389	Argentina	MISIONES	Obera		158137	2002	4	6.64	0.91	5.73	0	6.5	0.89	5.61	0	6.64	3.34	3.34	2333.5	1	3.34	3.34	1.94611	4541.24	621.8	3919.44	0	13.7048	0.137048	86.2952	0.862952
390	Argentina	MISIONES	San Ignacio		164979	2002	4	5.11	2.47	2.64	0	5	2.42	2.58	0	5.11	2.32	2.32	1607.01	1	2.32	2.32	2.15517	3463.38	1676.28	1787.1	0	48.3366	0.483366	51.6634	0.516634
391	Argentina	MISIONES	San Javier		67904.9	2002	4	4.08	0	4.08	0	4	0	4	0	4.08	2.94	2.94	2991.18	1	2.94	2.94	1.36054	4069.63	0	4069.63	0	0	0	100	1
392	Argentina	MISIONES	San Pedro		362084	2002	4	0.51	0.08	0.43	0	0.5	0.08	0.42	0	0.51	0.5	0.5	435.65	1	0.5	0.5	1	435.65	69.7	365.95	0	15.6863	0.156863	84.3137	0.843137
393	Argentina	NEUQUEN	Alumine		465163	2002	4	46	2.66	43.34	0	39.9	2.31	37.59	0	60.68	60.68	60.68	234663	0.758075	46	46	0.867391	154302	8933.29	145369	0	5.7826	0.0578261	94.2174	0.942174
394	Argentina	NEUQUEN	Anelo		1.16779e+06	2002	4	5686.84	70.47	5616.37	0	4933.1	61.13	4871.97	0	7537	6649.61	6649.61	51070748	0.754523	5017.28	5017.28	0.983222	3.78875e+07	469495	3.7418e+07	0	1.2392	0.0123918	98.7608	0.987608
395	Argentina	NEUQUEN	Catan Lil		562171	2002	4	7.84	0.83	7.01	0	6.8	0.72	6.08	0	10.39	10.39	10.39	53640.5	0.754572	7.84	7.84	0.867347	35106.4	3717.15	31389.2	0	10.5867	0.105867	89.4133	0.894133
396	Argentina	NEUQUEN	Chos Malal		440713	2002	4	1301.62	54.02	1247.6	0	1129.1	46.86	1082.24	0	1708.41	1149	1149	9295672	0.76189	875.41	875.41	1.2898	9.13469e+06	379109	8.75558e+06	0	4.1502	0.0415021	95.8498	0.958498
397	Argentina	NEUQUEN	Collon Cura		561483	2002	4	21.33	0	21.33	0	18.5	0	18.5	0	28.27	28.27	28.27	165787	0.75451	21.33	21.33	0.867323	108491	0	108491	0	0	0	100	1
398	Argentina	NEUQUEN	Confluencia		751417	2002	4	7688.9	617.27	7071.63	0	6669.8	535.46	6134.34	0	8486.62	5974.35	5974.35	46148900	0.906003	5412.78	5412.78	1.23223	5.15209e+07	4.13616e+06	4.73847e+07	0	8.0281	0.0802807	91.9719	0.919719
399	Argentina	NEUQUEN	Huiliches		389251	2002	4	0.23	0	0.23	0	0.2	0	0.2	0	0.3	0.3	0.3	1222.31	0.766667	0.23	0.23	0.869565	814.87	0	814.87	0	0	0	100	1
400	Argentina	NEUQUEN	Lacar		502182	2002	4	26.98	2.85	24.13	0	23.4	2.47	20.93	0	35.16	35.16	35.16	171713	0.767349	26.98	26.98	0.867309	114280	12062.9	102217	0	10.5634	0.105634	89.4366	0.894366
401	Argentina	NEUQUEN	Loncopue		547164	2002	4	0	0	0	0	0	0	0	0	0	0	0	0	1	0	0	1	0	0	0	0	-1	-1	-1	-1
402	Argentina	NEUQUEN	Los Lagos		399652	2002	4	1.15	0	1.15	0	1	0	1	0	1.51	1.51	1.51	6758.06	0.761589	1.15	1.15	0.869565	4475.54	0	4475.54	0	0	0	100	1
403	Argentina	NEUQUEN	Minas		637527	2002	4	204.62	0.78	203.84	0	177.5	0.68	176.82	0	271.19	265.31	265.31	1595524	0.754526	200.18	200.18	0.886702	1.06747e+06	4089.46	1.06338e+06	0	0.3812	0.00381194	99.6188	0.996188
404	Argentina	NEUQUEN	Nroquin		546871	2002	4	74.36	0.83	73.53	0	64.5	0.72	63.78	0	98.55	98.55	98.55	505587	0.754541	74.36	74.36	0.867402	330902	3693.79	327208	0	1.1162	0.0111619	98.8838	0.988838
405	Argentina	NEUQUEN	Pehuenches		917498	2002	4	204.97	0	204.97	0	177.8	0	177.8	0	271.65	271.65	271.65	2.34331e+06	0.754537	204.97	204.97	0.867444	1.53374e+06	0	1.53374e+06	0	0	0	100	1
406	Argentina	NEUQUEN	Picun Leufu		449152	2002	4	1493.79	338.2	1155.59	0	1295.8	293.37	1002.43	0	1979.78	1979.78	1979.78	13481186	0.754523	1493.79	1493.79	0.867458	8.82367e+06	1.99768e+06	6.82598e+06	0	22.6404	0.226404	77.3596	0.773596
407	Argentina	NEUQUEN	Picunches		594982	2002	4	562.22	9.84	552.38	0	487.7	8.54	479.16	0	745.13	502.28	502.28	2.52488e+06	0.754526	378.98	378.98	1.28688	2.45161e+06	42929.5	2.40868e+06	0	1.7502	0.017502	98.2498	0.982498
408	Argentina	NEUQUEN	Zapala		522973	2002	4	379.15	22.42	356.73	0	328.9	19.45	309.45	0	502.5	502.5	502.5	3.18652e+06	0.754527	379.15	379.15	0.867467	2.08567e+06	123339	1.96233e+06	0	5.9132	0.0591323	94.0868	0.940868
409	Argentina	RIO NEGRO	25 de Mayo		2.77309e+06	2002	4	0	0	0	0	0	0	0	0	0	0	0	0	1	0	0	1	0	0	0	0	-1	-1	-1	-1
410	Argentina	RIO NEGRO	9 de Julio		2.3908e+06	2002	4	19.13	1.86	17.27	0	10.3	1	9.3	0	19.13	19.13	19.13	187556	1	19.13	19.13	0.538421	100984	9804.3	91180	0	9.7229	0.0972295	90.2771	0.902771
411	Argentina	RIO NEGRO	Adolfo Alsina		903641	2002	4	18144.2	0	18144.2	0	9768.4	0	9768.4	0	18144.2	6953.21	6953.21	55307120	1	6953.21	6953.21	1.40488	7.76997e+07	0	7.76997e+07	0	0	0	100	1
412	Argentina	RIO NEGRO	Avellaneda		2.00154e+06	2002	4	34060.1	148.22	33911.9	0	18337.1	79.8	18257.3	0	34060.1	12068.4	12068.4	96089880	1	12068.4	12068.4	1.51943	1.46002e+08	635378	1.45367e+08	0	0.4352	0.00435172	99.5648	0.995648
413	Argentina	RIO NEGRO	Barioche		545015	2002	4	985.74	48.81	936.93	0	530.7	26.28	504.42	0	985.74	689.97	689.97	1.07128e+06	1	689.97	689.97	0.769164	823991	40803.6	783187	0	4.9516	0.0495161	95.0484	0.950484
414	Argentina	RIO NEGRO	Conesa		980992	2002	4	9501.55	49.19	9452.36	0	5115.4	26.48	5088.92	0	9501.55	6583.32	6583.32	53052268	1	6583.32	6583.32	0.777024	4.12229e+07	213391	4.10095e+07	0	0.5177	0.00517705	99.4823	0.994823
415	Argentina	RIO NEGRO	El Cuy		2.15016e+06	2002	4	2393.13	219.98	2173.15	0	1288.4	118.43	1169.97	0	2643.25	1737.38	1737.38	12895080	0.905374	1572.98	1572.98	0.819082	9.56268e+06	879004	8.68368e+06	0	9.1921	0.0919215	90.8079	0.908079
416	Argentina	RIO NEGRO	General Roca		1.45335e+06	2002	4	62974.5	4170.77	58803.7	0	33903.9	2245.44	31658.5	0	62974.5	41222.3	41222.3	303526560	1	41222.3	41222.3	0.822465	2.4964e+08	1.65335e+07	2.33106e+08	0	6.6229	0.0662295	93.3771	0.933771
417	Argentina	RIO NEGRO	Norquinco		824069	2002	4	247.04	0	247.04	0	133	0	133	0	247.04	247.04	247.04	1.28795e+06	1	247.04	247.04	0.538374	693397	0	693397	0	0	0	100	1
418	Argentina	RIO NEGRO	Pichi Mahuida		1.57427e+06	2002	4	6598.37	32.97	6565.4	0	3552.4	17.75	3534.65	0	6598.37	2551.99	2551.99	19269080	1	2551.99	2551.99	1.39201	2.68228e+07	134023	2.66888e+07	0	0.4997	0.00499669	99.5003	0.995003
419	Argentina	RIO NEGRO	Pilcaniyeu		1.08994e+06	2002	4	217.13	4.12	213.01	0	116.9	2.22	114.68	0	222.03	222.03	222.03	1.07449e+06	0.977931	217.13	217.13	0.538387	565723	10743.4	554980	0	1.8975	0.0189748	98.1025	0.981025
420	Argentina	RIO NEGRO	San Antonio		1.41589e+06	2002	4	0	0	0	0	0	0	0	0	0	0	0	0	1	0	0	1	0	0	0	0	-1	-1	-1	-1
421	Argentina	RIO NEGRO	Valcheta		2.1143e+06	2002	4	30.09	2.69	27.4	0	16.2	1.45	14.75	0	30.09	30.09	30.09	255300	1	30.09	30.09	0.538385	137450	12302.6	125147	0	8.9398	0.0893985	91.0602	0.910602
422	Argentina	SALTA	Anta		2.22014e+06	2002	4	72841.3	1262.36	71579	0	57563.6	997.59	56566	0	72841.3	58624.2	58624.2	136014384	1	58624.2	58624.2	0.981909	1.33554e+08	2.31452e+06	1.31239e+08	0	1.733	0.0173303	98.267	0.98267
423	Argentina	SALTA	Cachi		280702	2002	4	2067.17	0	2067.17	0	1633.6	0	1633.6	0	2067.17	2002.41	2002.41	5.29831e+06	1	2002.41	2002.41	0.815817	4.32245e+06	0	4.32245e+06	0	0	0	100	1
424	Argentina	SALTA	Cafayate		137898	2002	4	2053.88	278.97	1774.91	0	1623.1	220.46	1402.64	0	2053.88	1633.06	1633.06	3398907	1	1633.06	1633.06	0.993901	3.37818e+06	458846	2.91933e+06	0	13.5826	0.135826	86.4174	0.864174
425	Argentina	SALTA	Capital		156973	2002	4	600.69	151.49	449.2	0	474.7	119.72	354.98	0	600.69	434.72	434.72	645970	1	434.72	434.72	1.09197	705378	177897	527480	0	25.2193	0.252193	74.7807	0.747807
426	Argentina	SALTA	Cerrillos		50350.8	2002	4	9271.38	3330.36	5941.02	0	7326.8	2631.85	4694.95	0	9271.38	8533.14	8533.14	7.04444e+06	1	8533.14	8533.14	0.858629	6.04856e+06	2.1727e+06	3.87587e+06	0	35.9209	0.359209	64.0791	0.640791
427	Argentina	SALTA	Chicoana		98036.4	2002	4	7575.23	348.3	7226.93	0	5986.4	275.25	5711.15	0	7575.23	6402.01	6402.01	7.6099e+06	1	6402.01	6402.01	0.935081	7.11588e+06	327183	6.7887e+06	0	4.5979	0.0459788	95.4021	0.954021
428	Argentina	SALTA	General Guemes		231972	2002	4	9796.52	834.9	8961.62	0	7741.8	659.79	7082.01	0	9796.52	7511.51	7511.51	16424527	1	7511.51	7511.51	1.03066	1.69281e+07	1.44268e+06	1.54854e+07	0	8.5224	0.0852241	91.4776	0.914776
429	Argentina	SALTA	General Jose de San Marti		1.59621e+06	2002	4	1991.62	663.69	1327.93	0	1573.9	524.49	1049.41	0	1991.62	1188.6	1188.6	2.04e+06	1	1188.6	1188.6	1.32416	2.70129e+06	900185	1.80111e+06	0	33.3241	0.333241	66.6759	0.666759
430	Argentina	SALTA	Guachipas		289961	2002	4	1845.09	159.07	1686.02	0	1458.1	125.71	1332.39	0	1845.09	1243.22	1243.22	2755794	1	1243.22	1243.22	1.17284	3.23211e+06	278656	2.95345e+06	0	8.6213	0.0862126	91.3787	0.913787
431	Argentina	SALTA	Iruya		356019	2002	4	109.08	0	109.08	0	86.2	0	86.2	0	109.08	109.08	109.08	611246	1	109.08	109.08	0.790246	483035	0	483035	0	0	0	100	1
432	Argentina	SALTA	La Caldera		110660	2002	4	754.69	45.88	708.81	0	596.4	36.26	560.14	0	754.69	589.31	589.31	947100	1	589.31	589.31	1.01203	958494	58274.6	900219	0	6.0793	0.0607932	93.9207	0.939207
433	Argentina	SALTA	La Candelaria		123293	2002	4	1884.82	23.64	1861.18	0	1489.5	18.68	1470.82	0	1884.82	899.03	899.03	1.28396e+06	1	899.03	899.03	1.65679	2.12724e+06	26678	2.10056e+06	0	1.2542	0.0125423	98.7458	0.987458
434	Argentina	SALTA	La Poma		417972	2002	4	865.54	0	865.54	0	684	0	684	0	865.54	669.67	669.67	2719910	1	669.67	669.67	1.0214	2.77811e+06	0	2.77811e+06	0	0	0	100	1
435	Argentina	SALTA	La Vina		214212	2002	4	4180.27	130.19	4050.08	0	3303.5	102.88	3200.62	0	4180.27	2520.61	2520.61	4.21681e+06	1	2520.61	2520.61	1.3106	5.52653e+06	172111	5.35442e+06	0	3.1144	0.0311439	96.8856	0.968856
436	Argentina	SALTA	Los Andes		2.56632e+06	2002	4	0	0	0	0	0	0	0	0	0	0	0	0	1	0	0	1	0	0	0	0	-1	-1	-1	-1
437	Argentina	SALTA	Metan		548337	2002	4	7855.64	137.95	7717.69	0	6208	109.02	6098.98	0	7855.64	6321.32	6321.32	11995864	1	6321.32	6321.32	0.982073	1.17808e+07	206885	1.15739e+07	0	1.7561	0.0175606	98.2439	0.982439
438	Argentina	SALTA	Molinos		303777	2002	4	1195.43	0	1195.43	0	944.7	0	944.7	0	1195.43	1195.43	1195.43	2.91076e+06	1	1195.43	1195.43	0.79026	2.30025e+06	0	2.30025e+06	0	0	0	100	1
439	Argentina	SALTA	Oran		1191152	2002	4	14053.4	5095.6	8957.75	0	11105.8	4026.85	7078.95	0	14053.4	9578.27	9578.27	20080810	1	9578.27	9578.27	1.15948	2.32833e+07	8.44228e+06	1.4841e+07	0	36.259	0.36259	63.741	0.63741
440	Argentina	SALTA	Rivadavia		2.63462e+06	2002	4	0.63	0	0.63	0	0.5	0	0.5	0	0.63	0.63	0.63	3437.74	1	0.63	0.63	0.793651	2728.37	0	2728.37	0	0	0	100	1
441	Argentina	SALTA	Rosario de la Frontera		535696	2002	4	1238.2	0	1238.2	0	978.5	0	978.5	0	1238.2	1236.17	1236.17	3.50496e+06	1	1236.17	1236.17	0.791558	2.77438e+06	0	2.77438e+06	0	0	0	100	1
442	Argentina	SALTA	Rosario de Lerma		529792	2002	4	6650.47	188.66	6461.81	0	5255.6	149.09	5106.51	0	6650.47	5486.41	5486.41	7935690	1	5486.41	5486.41	0.957931	7.60184e+06	215648	7.38619e+06	0	2.8368	0.0283679	97.1632	0.971632
443	Argentina	SALTA	San Carlos		593151	2002	4	2650.52	23.45	2627.07	0	2094.6	18.53	2076.07	0	2650.52	2330.22	2330.22	5407407	1	2330.22	2330.22	0.898885	4.86064e+06	42999.9	4.81764e+06	0	0.8847	0.00884732	99.1153	0.991153
444	Argentina	SALTA	Santa Victoria		377205	2002	4	518.44	0	518.44	0	409.7	0	409.7	0	518.44	518.44	518.44	4266163	1	518.44	518.44	0.790255	3.37136e+06	0	3.37136e+06	0	0	0	100	1
445	Argentina	SAN JUAN	25 De Mayo		399582	2002	4	12470.9	2991.75	9479.12	0	12470.9	2991.75	9479.12	0	12534.5	12534.2	12534.2	82097640	0.994927	12470.6	12470.6	1.00002	8.16827e+07	1.95956e+07	6.20871e+07	0	23.9899	0.239899	76.0101	0.760101
446	Argentina	SAN JUAN	9 de Julio		15628.7	2002	4	3252.14	288.16	2963.98	0	3252.14	288.16	2963.98	0	3268.72	3268.71	3268.71	19788200	0.994928	3252.13	3252.13	1	1.96879e+07	1.74447e+06	1.79434e+07	0	8.8606	0.0886063	91.1394	0.911394
447	Argentina	SAN JUAN	Albardon		97082	2002	4	2552.23	507.23	2045	0	2552.23	507.23	2045	0	2565.24	2565.21	2565.21	19149702	0.994928	2552.2	2552.2	1.00001	1.90528e+07	3.78655e+06	1.52663e+07	0	19.874	0.19874	80.126	0.80126
448	Argentina	SAN JUAN	Angaco		265064	2002	4	2751.93	587.23	2164.7	0	2751.93	587.23	2164.7	0	2765.96	2765.92	2765.92	19511398	0.994928	2751.89	2751.89	1.00001	1.94127e+07	4.14245e+06	1.52703e+07	0	21.3388	0.213388	78.6612	0.786612
449	Argentina	SAN JUAN	Calingasta		2.22978e+06	2002	4	4211.65	69.04	4142.61	0	4211.65	69.04	4142.61	0	4233.12	4233.06	4233.06	22272838	0.994928	4211.59	4211.59	1.00001	2.21602e+07	363264	2.17969e+07	0	1.6393	0.0163926	98.3607	0.983607
450	Argentina	SAN JUAN	Capital		2817.45	2002	4	0	0	0	0	0	0	0	0	0	0	0	0	1	0	0	1	0	0	0	0	-1	-1	-1	-1
451	Argentina	SAN JUAN	Caucete		780523	2002	4	7270.49	161.57	7108.92	0	7270.49	161.57	7108.92	0	7307.56	7307.51	7307.51	38376340	0.994927	7270.44	7270.44	1.00001	3.81819e+07	848506	3.73334e+07	0	2.2223	0.0222227	97.7777	0.977777
452	Argentina	SAN JUAN	Chimbas		5607.12	2002	4	634.91	27.6	607.31	0	634.91	27.6	607.31	0	638.15	638.14	638.14	4.76674e+06	0.994923	634.9	634.9	1.00002	4.74262e+06	206165	4.53645e+06	0	4.3471	0.0434707	95.6529	0.956529
453	Argentina	SAN JUAN	Iglesia		1.90613e+06	2002	4	2160.63	27.52	2133.11	0	2160.63	27.52	2133.11	0	2171.65	2171.59	2171.59	12315200	0.994926	2160.57	2160.57	1.00003	12253047	156067	1.2097e+07	0	1.2737	0.012737	98.7263	0.987263
454	Argentina	SAN JUAN	Jachal		1.44963e+06	2002	4	4167.95	0	4167.95	0	4167.95	0	4167.95	0	4189.2	4189.13	4189.13	29846164	0.994927	4167.88	4167.88	1.00002	2.96953e+07	0	2.96953e+07	0	0	0	100	1
455	Argentina	SAN JUAN	Pocito		55609.8	2002	4	9761.82	3603.42	6158.4	0	9761.82	3603.42	6158.4	0	9811.59	9811.49	9811.49	76803552	0.994927	9761.72	9761.72	1.00001	7.64147e+07	2.82073e+07	4.82075e+07	0	36.9134	0.369134	63.0866	0.630866
456	Argentina	SAN JUAN	Rawson		29876.7	2002	4	5883.37	2745.04	3138.33	0	5883.37	2745.04	3138.33	0	5913.37	5913.34	5913.34	41815028	0.994927	5883.34	5883.34	1.00001	4.16031e+07	1.9411e+07	2.21921e+07	0	46.6576	0.466576	53.3424	0.533424
457	Argentina	SAN JUAN	Rivadavia		11715.1	2002	4	742.81	0	742.81	0	742.81	0	742.81	0	746.6	746.59	746.59	5235793	0.994924	742.8	742.8	1.00001	5.20928e+06	0	5.20928e+06	0	0	0	100	1
458	Argentina	SAN JUAN	San Martin		55851.4	2002	4	4229.45	891.68	3337.77	0	4229.45	891.68	3337.77	0	4251.01	4250.99	4250.99	25796870	0.994928	4229.43	4229.43	1	2.56662e+07	5.41111e+06	2.02551e+07	0	21.0826	0.210826	78.9174	0.789174
459	Argentina	SAN JUAN	Santa Lucia		5509.1	2002	4	2304.73	653.4	1651.33	0	2304.73	653.4	1651.33	0	2316.48	2316.48	2316.48	12421846	0.994928	2304.73	2304.73	1	1.23588e+07	3.50378e+06	8.85506e+06	0	28.3504	0.283504	71.6496	0.716496
460	Argentina	SAN JUAN	Sarmiento		280016	2002	4	11260	1654.7	9605.35	0	11260	1654.7	9605.35	0	11315	11314.8	11314.8	74965872	0.99514	11259.8	11259.8	1.00002	7.46029e+07	1.09631e+07	6.36398e+07	0	14.6953	0.146953	85.3047	0.853047
461	Argentina	SAN JUAN	Ullum		447653	2002	4	3352.94	328.01	3024.93	0	3352.94	328.01	3024.93	0	3370.04	3369.97	3369.97	27619788	0.994926	3352.87	3352.87	1.00002	2.74802e+07	2.68832e+06	2.47919e+07	0	9.7828	0.0978276	90.2172	0.902172
462	Argentina	SAN JUAN	Valle Fertil		553298	2002	4	266.1	54.58	211.52	0	266.1	54.58	211.52	0	267.46	267.46	267.46	958484	0.994915	266.1	266.1	1	953611	195596	758015	0	20.5111	0.205111	79.4889	0.794889
463	Argentina	SAN JUAN	Zonda		246083	2002	4	2242.33	643.15	1599.18	0	2242.33	643.15	1599.18	0	2253.76	2253.76	2253.76	13459599	0.994928	2242.33	2242.33	1	1.33913e+07	3.84093e+06	9.55041e+06	0	28.6822	0.286822	71.3178	0.713178
464	Argentina	SAN LUIS	Ayacucho		942850	2002	4	3018.6	215.61	2802.99	0	3018.6	215.61	2802.99	0	3018.6	3018.6	3018.6	9534584	1	3018.6	3018.6	1	9534584	681028	8.85356e+06	0	7.1427	0.0714272	92.8573	0.928573
465	Argentina	SAN LUIS	Belgrano		701912	2002	4	36.5	8.39	28.11	0	36.5	8.39	28.11	0	36.5	36.49	36.49	148356	1	36.49	36.49	1.00027	148397	34110.9	114286	0	22.9863	0.229863	77.0137	0.770137
466	Argentina	SAN LUIS	Chacabuco		283049	2002	4	374	24.39	349.61	0	374	24.39	349.61	0	374	374	374	951294	1	374	374	1	951294	62037.6	889256	0	6.5214	0.0652139	93.4786	0.934786
467	Argentina	SAN LUIS	Coronel Pringles		409583	2002	4	7571	5524.78	2046.22	0	7571	5524.78	2046.22	0	7571	7570.99	7570.99	28701148	1	7570.99	7570.99	1	2.87012e+07	2.09441e+07	7.75709e+06	0	72.9729	0.729729	27.0271	0.270271
468	Argentina	SAN LUIS	General Pedernera		1.38781e+06	2002	4	2126	332.19	1793.81	0	2126	332.19	1793.81	0	2126	2126	2126	7240355	1	2126	2126	1	7240355	1.13131e+06	6.10904e+06	0	15.6251	0.156251	84.3749	0.843749
469	Argentina	SAN LUIS	Gobernador Dupuy		1.96072e+06	2002	4	0	0	0	0	0	0	0	0	0	0	0	0	1	0	0	1	0	0	0	0	-1	-1	-1	-1
470	Argentina	SAN LUIS	Junin		219632	2002	4	4889	1074.89	3814.11	0	4889	1074.89	3814.11	0	4889	4889	4889	10775851	1	4889	4889	1	10775851	2.36917e+06	8.40668e+06	0	21.9859	0.219859	78.0141	0.780141
471	Argentina	SAN LUIS	La Capital		1.32852e+06	2002	4	560	70	490	0	560	70	490	0	560	560	560	2.5515e+06	1	560	560	1	2.5515e+06	318938	2.23256e+06	0	12.5	0.125	87.5	0.875
472	Argentina	SAN LUIS	Libertador General San Ma		352835	2002	4	0	0	0	0	0	0	0	0	0	0	0	0	1	0	0	1	0	0	0	0	-1	-1	-1	-1
473	Argentina	SANTA CRUZ	Corpen Aike		2.63514e+06	2002	4	4569.35	2334.55	2234.8	0	3210	1640.04	1569.96	0	4569.35	2376.52	2376.52	17161094	1	2376.52	2376.52	1.35071	2.31797e+07	1.18429e+07	1.13368e+07	0	51.0915	0.510915	48.9085	0.489085
474	Argentina	SANTA CRUZ	Deseado		6.29608e+06	2002	4	0.71	0.17	0.54	0	0.5	0.12	0.38	0	0.71	0.71	0.71	6842.31	1	0.71	0.71	0.704225	4818.53	1156.45	3662.08	0	23.9437	0.239437	76.0563	0.760563
475	Argentina	SANTA CRUZ	Ger Aike		3.35839e+06	2002	4	163.7	0	163.7	0	115	0	115	0	163.7	135.6	135.6	273975	1	135.6	135.6	0.848083	232353	0	232353	0	0	0	100	1
476	Argentina	SANTA CRUZ	Lago Argentino		3.76698e+06	2002	4	170.82	0	170.82	0	120	0	120	0	170.82	170.82	170.82	773549	1	170.82	170.82	0.702494	543414	0	543414	0	0	0	100	1
477	Argentina	SANTA CRUZ	Lago Buenos Aires		2.84308e+06	2002	4	562.42	44.65	517.77	0	395.1	31.37	363.73	0	562.42	560.01	559.75	5209936	1	560.01	559.75	0.705851	3.67744e+06	291980	3.38546e+06	0	7.9389	0.0793891	92.0611	0.920611
478	Argentina	SANTA CRUZ	Magallanes		2.03379e+06	2002	4	0	0	0	0	0	0	0	0	0	0	0	0	1	0	0	1	0	0	0	0	-1	-1	-1	-1
479	Argentina	SANTA CRUZ	Rio Chico		3.39159e+06	2002	4	0	0	0	0	0	0	0	0	0	0	0	0	1	0	0	1	0	0	0	0	-1	-1	-1	-1
480	Argentina	SANTA FE	9 de Julio		1.73836e+06	2002	4	150	50	100	0	150	50	100	0	150	149.87	149.87	419191	1	149.87	149.87	1.00087	419555	139852	279703	0	33.3333	0.333333	66.6667	0.666667
481	Argentina	SANTA FE	Belgrano		230228	2002	4	0	0	0	0	0	0	0	0	0	0	0	0	1	0	0	1	0	0	0	0	-1	-1	-1	-1
482	Argentina	SANTA FE	Caseros		325376	2002	4	288	157.09	130.91	0	288	157.09	130.91	0	288	288	288	485687	1	288	288	1	485687	264918	220768	0	54.5451	0.545451	45.4549	0.454549
483	Argentina	SANTA FE	Castellanos		671206	2002	4	11	5.5	5.5	0	11	5.5	5.5	0	11	10.96	10.96	25941.5	1	10.96	10.96	1.00365	26036.2	13018.1	13018.1	0	50	0.5	50	0.5
484	Argentina	SANTA FE	Constitucion		317475	2002	4	661.9	378.23	283.67	0	661.9	378.23	283.67	0	661.9	661.9	661.9	1.07998e+06	1	661.9	661.9	1	1.07998e+06	617136	462848	0	57.1431	0.571431	42.8569	0.428569
485	Argentina	SANTA FE	Garay		416810	2002	4	3150.9	2147.28	1003.62	0	3150.9	2147.28	1003.62	0	3150.9	2836.84	2836.84	5.57818e+06	1	2836.84	2836.84	1.11071	6.19572e+06	4.22227e+06	1.97345e+06	0	68.1481	0.681481	31.8519	0.318519
486	Argentina	SANTA FE	General Lopez		1.14421e+06	2002	4	18013.8	13343.6	4670.24	0	18013.8	13343.6	4670.24	0	18013.8	17906.7	17906.7	30399570	1	17906.7	17906.7	1.00598	3.05815e+07	2.2653e+07	7.92852e+06	0	74.0741	0.740741	25.9259	0.259259
487	Argentina	SANTA FE	General Obligado		1.11256e+06	2002	4	505.9	317.13	188.77	0	505.9	317.13	188.77	0	505.9	505.84	505.84	1.33383e+06	1	505.84	505.84	1.00012	1.33398e+06	836225	497759	0	62.6863	0.626863	37.3137	0.373137
488	Argentina	SANTA FE	Iriondo		335816	2002	4	65.8	65.8	0	0	65.8	65.8	0	0	65.8	65.77	65.77	111692	1	65.77	65.77	1.00046	111743	111743	0	0	100	1	0	0
489	Argentina	SANTA FE	La Capital		305628	2002	4	3258.6	3129.97	128.63	0	3258.6	3129.97	128.63	0	3258.6	3257.41	3257.41	7941796	1	3257.41	3257.41	1.00037	7.9447e+06	7.63109e+06	313609	0	96.0526	0.960526	3.9474	0.039474
490	Argentina	SANTA FE	Las Colonias		632144	2002	4	136	75.56	60.44	0	136	75.56	60.44	0	136	136	136	316524	1	136	136	1	316524	175857	140667	0	55.5588	0.555588	44.4412	0.444412
491	Argentina	SANTA FE	Rosario		197922	2002	4	4067.3	3821.86	245.44	0	4067.3	3821.86	245.44	0	4067.3	4067.3	4067.3	6.56099e+06	1	4067.3	4067.3	1	6.56099e+06	6.16507e+06	395921	0	93.9655	0.939655	6.0345	0.0603447
492	Argentina	SANTA FE	San Cristobal		1.44034e+06	2002	4	200.1	66.7	133.4	0	200.1	66.7	133.4	0	200.1	199.98	199.98	496838	1	199.98	199.98	1.0006	497136	165712	331424	0	33.3333	0.333333	66.6667	0.666667
493	Argentina	SANTA FE	San Javier		682150	2002	4	4155.9	1385.3	2770.6	0	4155.9	1385.3	2770.6	0	4155.9	4119.14	4119.14	11861753	1	4119.14	4119.14	1.00892	1.19676e+07	3.9892e+06	7.97841e+06	0	33.3333	0.333333	66.6667	0.666667
494	Argentina	SANTA FE	San Jeronimo		441859	2002	4	2046.9	975.85	1071.05	0	2046.9	975.85	1071.05	0	2046.9	2046.9	2046.9	4475349	1	2046.9	2046.9	1	4475349	2.1336e+06	2.34175e+06	0	47.6745	0.476745	52.3255	0.523255
495	Argentina	SANTA FE	San Justo		558899	2002	4	671.1	167.78	503.32	0	671.1	167.78	503.32	0	671.1	671.07	671.07	1.80036e+06	1	671.07	671.07	1.00004	1.80045e+06	450125	1.35032e+06	0	25.0007	0.250007	74.9993	0.749993
496	Argentina	SANTA FE	San Lorenzo		207725	2002	4	36	21.6	14.4	0	36	21.6	14.4	0	36	35.99	35.99	60517.2	1	35.99	35.99	1.00028	60534.1	36320.4	24213.6	0	60	0.6	40	0.4
497	Argentina	SANTA FE	San Martin		483242	2002	4	2.1	1.4	0.7	0	2.1	1.4	0.7	0	2.1	2.06	2.06	4482.42	1	2.06	2.06	1.01942	4569.46	3046.31	1523.15	0	66.6667	0.666667	33.3333	0.333333
498	Argentina	SANTA FE	Vera		2.081e+06	2002	4	0	0	0	0	0	0	0	0	0	0	0	0	1	0	0	1	0	0	0	0	-1	-1	-1	-1
499	Argentina	SANTIAGO DEL ESTERO	Aguirre		433795	2002	4	605.41	99.99	505.42	0	225	37.16	187.84	0	605.41	605.39	605.39	2.44215e+06	1	605.39	605.39	0.371661	907652	149904	757748	0	16.5161	0.165161	83.4839	0.834839
500	Argentina	SANTIAGO DEL ESTERO	Alberdi		1.30482e+06	2002	4	0	0	0	0	0	0	0	0	0	0	0	0	1	0	0	1	0	0	0	0	-1	-1	-1	-1
501	Argentina	SANTIAGO DEL ESTERO	Atamisqui		226996	2002	4	5.38	0	5.38	0	2	0	2	0	5.38	5.38	5.38	8823.32	1	5.38	5.38	0.371747	3280.04	0	3280.04	0	0	0	100	1
502	Argentina	SANTIAGO DEL ESTERO	Avellaneda		373634	2002	4	10763.4	0	10763.4	0	4000.2	0	4000.2	0	10763.4	5024.72	5024.72	8469904	1	5024.72	5024.72	0.796104	6.74292e+06	0	6.74292e+06	0	0	0	100	1
503	Argentina	SANTIAGO DEL ESTERO	Banda		354956	2002	4	31614	18.54	31595.4	0	11749.3	6.89	11742.4	0	31614	9690.26	9690.26	24111654	1	9690.26	9690.26	1.21249	2.9235e+07	17144	2.92179e+07	0	0.0586	0.000586449	99.9414	0.999414
504	Argentina	SANTIAGO DEL ESTERO	Belgrano		348644	2002	4	0	0	0	0	0	0	0	0	0	0	0	0	1	0	0	1	0	0	0	0	-1	-1	-1	-1
505	Argentina	SANTIAGO DEL ESTERO	Capital		213964	2002	4	5781.26	9.15	5772.11	0	2148.6	3.4	2145.2	0	5781.26	1738.98	1738.98	6471419	1	1738.98	1738.98	1.23555	7.99577e+06	12652.7	7.98312e+06	0	0.1583	0.0015827	99.8417	0.998417
506	Argentina	SANTIAGO DEL ESTERO	Choya		610336	2002	4	43.32	3.09	40.23	0	16.1	1.15	14.95	0	43.32	42.58	42.58	191633	1	42.58	42.58	0.378112	72458.7	5175.62	67283.1	0	7.133	0.0713296	92.867	0.92867
507	Argentina	SANTIAGO DEL ESTERO	Copo		1.35448e+06	2002	4	0	0	0	0	0	0	0	0	0	0	0	0	1	0	0	1	0	0	0	0	-1	-1	-1	-1
508	Argentina	SANTIAGO DEL ESTERO	Figueroa		714778	2002	4	751.52	0	751.52	0	279.3	0	279.3	0	751.52	443.87	443.87	935813	1	443.87	443.87	0.629238	588850	0	588850	0	0	0	100	1
509	Argentina	SANTIAGO DEL ESTERO	General Taboada		606677	2002	4	3761.62	397.15	3364.47	0	1398	147.6	1250.4	0	3761.62	1554.9	1554.9	3.22704e+06	1	1554.9	1554.9	0.899093	2.90141e+06	306329	2595081	0	10.558	0.10558	89.442	0.89442
510	Argentina	SANTIAGO DEL ESTERO	Guasayan		259274	2002	4	1754.34	446.12	1308.22	0	652	165.8	486.2	0	1754.34	379	379	1628285	1	379	379	1.72032	2.80117e+06	712321	2.08884e+06	0	25.4295	0.254295	74.5705	0.745705
511	Argentina	SANTIAGO DEL ESTERO	Jimenez		524968	2002	4	1411.28	470.85	940.43	0	524.5	174.99	349.51	0	1411.28	1411.27	1411.27	7199859	1	1411.27	1411.27	0.371651	2.67584e+06	892744	1.78309e+06	0	33.3633	0.333633	66.6367	0.666367
512	Argentina	SANTIAGO DEL ESTERO	Juan F. Ibarra		929298	2002	4	1474.51	249.08	1225.43	0	548	92.57	455.43	0	1474.51	447.25	447.25	784858	1	447.25	447.25	1.22527	961659	162447	799212	0	16.8924	0.168924	83.1076	0.831076
513	Argentina	SANTIAGO DEL ESTERO	Loreto		331643	2002	4	165.48	0.86	164.62	0	61.5	0.32	61.18	0	165.48	148.86	148.86	224419	1	148.86	148.86	0.41314	92716.3	482.43	92233.8	0	0.5197	0.005197	99.4803	0.994803
514	Argentina	SANTIAGO DEL ESTERO	Mitre		326679	2002	4	0	0	0	0	0	0	0	0	0	0	0	0	1	0	0	1	0	0	0	0	-1	-1	-1	-1
515	Argentina	SANTIAGO DEL ESTERO	Moreno		1.66804e+06	2002	4	0	0	0	0	0	0	0	0	0	0	0	0	1	0	0	1	0	0	0	0	-1	-1	-1	-1
516	Argentina	SANTIAGO DEL ESTERO	Ojo de Agua		621615	2002	4	0	0	0	0	0	0	0	0	0	0	0	0	1	0	0	1	0	0	0	0	-1	-1	-1	-1
517	Argentina	SANTIAGO DEL ESTERO	Pellegrini		695631	2002	4	3399.18	31.19	3367.99	0	1263.3	11.59	1251.71	0	3399.18	2505.94	2505.94	7030131	1	2505.94	2505.94	0.504122	3.54405e+06	32514.4	3.51153e+06	0	0.9176	0.00917574	99.0824	0.990824
518	Argentina	SANTIAGO DEL ESTERO	Quebrachos		371909	2002	4	0	0	0	0	0	0	0	0	0	0	0	0	1	0	0	1	0	0	0	0	-1	-1	-1	-1
519	Argentina	SANTIAGO DEL ESTERO	Rio Hondo		216068	2002	4	73.99	2.5	71.49	0	27.5	0.93	26.57	0	73.99	72	72	406510	1	72	72	0.381944	155264	5250.76	150014	0	3.3788	0.0337883	96.6212	0.966212
520	Argentina	SANTIAGO DEL ESTERO	Rivadavia		323875	2002	4	0	0	0	0	0	0	0	0	0	0	0	0	1	0	0	1	0	0	0	0	-1	-1	-1	-1
521	Argentina	SANTIAGO DEL ESTERO	Robles		134299	2002	4	58969.4	454.22	58515.2	0	21915.9	168.81	21747.1	0	58969.4	21286.6	21286.6	50839576	1	21286.6	21286.6	1.02956	5.23426e+07	403176	5.19395e+07	0	0.7703	0.00770264	99.2297	0.992297
522	Argentina	SANTIAGO DEL ESTERO	Salavina		309724	2002	4	0	0	0	0	0	0	0	0	0	0	0	0	1	0	0	1	0	0	0	0	-1	-1	-1	-1
523	Argentina	SANTIAGO DEL ESTERO	San Martin		181987	2002	4	12102.3	0	12102.3	0	4497.8	0	4497.8	0	12102.3	3089.42	3089.42	5747092	1	3089.42	3089.42	1.45587	8.36703e+06	0	8.36703e+06	0	0	0	100	1
524	Argentina	SANTIAGO DEL ESTERO	Sarmiento		164035	2002	4	1199.25	0	1199.25	0	445.7	0	445.7	0	1199.25	380.63	380.63	826662	1	380.63	380.63	1.17095	967983	0	967983	0	0	0	100	1
525	Argentina	SANTIAGO DEL ESTERO	Silipica		110481	2002	4	8947.43	0	8947.43	0	3325.3	0	3325.3	0	8947.43	3680.29	3680.29	9199834	1	3680.29	3680.29	0.903543	8.31244e+06	0	8.31244e+06	0	0	0	100	1
526	Argentina	TIERRA DEL FUEGO	Rio Grande		1.19355e+06	2002	4	0	0	0	0	0	0	0	0	0	0	0	0	1	0	0	1	0	0	0	0	-1	-1	-1	-1
527	Argentina	TIERRA DEL FUEGO	Ushuaia		882207	2002	4	0.4	0.03	0.37	0	0.4	0.03	0.37	0	0.4	0.4	0.4	9.72	1	0.4	0.4	1	9.72	0.73	8.99	0	7.5	0.075	92.5	0.925
528	Argentina	TUCUMAN	Burruyacu		379687	2002	4	10428.2	1823.83	8604.35	0	7856.5	1374.06	6482.44	0	10428.2	9043.57	9043.57	23159546	1	9043.57	9043.57	0.868739	2.01196e+07	3.51881e+06	1.66008e+07	0	17.4894	0.174894	82.5106	0.825106
529	Argentina	TUCUMAN	Capital		8452.47	2002	4	86.28	28.88	57.4	0	65	21.76	43.24	0	86.28	61.98	61.98	113463	1	61.98	61.98	1.04873	118992	39834.8	79157.1	0	33.4724	0.334724	66.5276	0.665276
530	Argentina	TUCUMAN	Chicligasta		129276	2002	4	4832.81	107.09	4725.72	0	3641	80.68	3560.32	0	4832.81	4487.59	4487.59	18416492	1	4487.59	4487.59	0.811349	1.49422e+07	331100	1.46111e+07	0	2.2159	0.022159	97.7841	0.977841
531	Argentina	TUCUMAN	Cruz Alta		116836	2002	4	16338.4	2320.59	14017.8	0	12309.2	1748.31	10560.9	0	16338.4	13061.1	13061.1	30468964	1	13061.1	13061.1	0.942433	2.8715e+07	4.07846e+06	2.46365e+07	0	14.2033	0.142033	85.7967	0.857967
532	Argentina	TUCUMAN	Famailla		41479.7	2002	4	1792.03	382.52	1409.51	0	1350.1	288.19	1061.91	0	1792.03	1792.03	1792.03	6523550	1	1792.03	1792.03	0.753391	4.91479e+06	1.0491e+06	3.86568e+06	0	21.3456	0.213456	78.6544	0.786544
533	Argentina	TUCUMAN	Graneros		172985	2002	4	2980.26	142.56	2837.7	0	2245.3	107.4	2137.9	0	2980.26	1664.88	1664.88	5164031	1	1664.88	1664.88	1.34863	6.96435e+06	333127	6.63122e+06	0	4.7835	0.0478348	95.2165	0.952165
534	Argentina	TUCUMAN	Juan B. Alberdi		76819.3	2002	4	9942.91	474.41	9468.5	0	7490.9	357.42	7133.48	0	9942.91	7417.34	7417.34	38864404	1	7417.34	7417.34	1.00992	3.92498e+07	1.87276e+06	3.73771e+07	0	4.7713	0.0477134	95.2287	0.952287
535	Argentina	TUCUMAN	La Cocha		95919	2002	4	14347	272.17	14074.8	0	10808.9	205.05	10603.9	0	14347	9919.11	9919.11	42302664	1	9919.11	9919.11	1.0897	4.60974e+07	874490	4.52229e+07	0	1.8971	0.0189705	98.1029	0.981029
536	Argentina	TUCUMAN	Leales		191416	2002	4	1680	478.28	1201.72	0	1265.7	360.33	905.37	0	1680	954.13	954.13	2.95602e+06	1	954.13	954.13	1.32655	3.9213e+06	1.11635e+06	2.80495e+06	0	28.469	0.28469	71.531	0.71531
537	Argentina	TUCUMAN	Lules		52144.2	2002	4	2400.48	17.22	2383.26	0	1808.5	12.97	1795.53	0	2400.48	2194.83	2194.83	5497944	1	2194.83	2194.83	0.823982	4.53021e+06	32489.2	4.49772e+06	0	0.7174	0.00717357	99.2826	0.992826
538	Argentina	TUCUMAN	Monteros		119464	2002	4	30.4	7.63	22.77	0	22.9	5.75	17.15	0	30.4	30.29	30.29	128254	1	30.29	30.29	0.756025	96963.1	24346.6	72616.4	0	25.0987	0.250987	74.9013	0.749013
539	Argentina	TUCUMAN	Rio Chico		60760.6	2002	4	4969	94.6	4874.4	0	3743.6	71.27	3672.33	0	4969	3887.57	3887.57	17415698	1	3887.57	3887.57	0.962967	1.67707e+07	319278	1.64515e+07	0	1.9038	0.019038	98.0962	0.980962
540	Argentina	TUCUMAN	Simoca		128202	2002	4	1616.69	234.39	1382.3	0	1218	176.59	1041.41	0	1616.69	1386.54	1386.54	5.73654e+06	1	1386.54	1386.54	0.878446	5.03924e+06	730607	4.30863e+06	0	14.4981	0.144981	85.5019	0.855019
541	Argentina	TUCUMAN	Tafi del Valle		256481	2002	4	1938.04	127.86	1810.18	0	1460.1	96.33	1363.77	0	1938.04	1577.99	1577.99	3846422	1	1577.99	1577.99	0.925291	3.55906e+06	234809	3.32425e+06	0	6.5974	0.0659739	93.4026	0.934026
542	Argentina	TUCUMAN	Tafi Viejo		115854	2002	4	2036.79	1046.26	990.53	0	1534.5	788.24	746.26	0	2036.79	1780.39	1780.39	8193533	1	1780.39	1780.39	0.86189	7.06192e+06	3.62756e+06	3.43436e+06	0	51.3681	0.513681	48.6319	0.486319
543	Argentina	TUCUMAN	Trancas		297198	2002	4	11704.4	106.88	11597.5	0	8818	80.52	8737.48	0	11704.4	5588.11	5588.11	9751188	1	5588.11	5588.11	1.57799	1.53873e+07	140506	1.52468e+07	0	0.9132	0.0091316	99.0868	0.990868
544	Argentina	TUCUMAN	Yerba Buena		14895.2	2002	4	510.36	48.06	462.3	0	384.5	36.21	348.29	0	510.36	510.36	510.36	1.4033e+06	1	510.36	510.36	0.75339	1.05723e+06	99563.9	957667	0	9.4169	0.0941688	90.5831	0.905831
545	Armenia				2.96174e+06	2006	1	273530	50877	222653	0	176000	32736	143264	0	286027	168285	119234	579145024	0.956308	160933	114025	1.09363	6.05695e+08	1.12659e+08	4.93036e+08	0	18.6002	0.186002	81.3998	0.813998
546	Aruba				20719.6	-9	9	0	0	0	0	0	0	0	0	0	0	0	0	1	0	0	1	0	0	0	0	-1	-1	-1	-1
547	Australia	Australian Capital Territory	Australian Capital Territory - Bal	Australian Capital Territory - Bal	154390	2006	3	0	0	0	0	0	0	0	0	60.6	7.32	7.3	34100.3	0	0	0	1	0	0	0	0	-1	-1	-1	-1
548	Australia	Australian Capital Territory	Canberra	Belconnen	13060	2006	3	648.28	0	576.32	71.96	20	0	17.78	2.22	0	0	0	0	1	0	0	1	82343.7	0	73203.6	9140.16	0	0	88.8999	0.888999
549	Australia	Australian Capital Territory	Canberra	Gungahlin-Hall	9057.15	2006	3	47.95	6.85	41.09	0.01	20	2.86	17.14	0	3	3.1	3	7574.04	15.983	49.55	47.95	0.417101	50493.6	7220.58	43273	0	14.2857	0.142857	85.6934	0.856934
550	Australia	Australian Capital Territory	Canberra	North Canberra	20673.6	2006	3	20	2.86	17.14	0	20	2.86	17.14	0	1.53	0.36	0.36	1532.11	13.072	4.71	4.71	4.24628	85042.8	12161.1	72881.7	0	14.3	0.143	85.7	0.857
551	Australia	Australian Capital Territory	Canberra	South Canberra	8639.07	2006	3	193	0.6	191.8	0.6	193	0.6	191.8	0.6	5	1.25	1.25	4939.41	38.6	48.25	48.25	4	762645	2370.92	757903	2370.92	0.3109	0.00310881	99.3782	0.993782
552	Australia	Australian Capital Territory	Canberra	Tuggeranong	16059	2006	3	0	0	0	0	0	0	0	0	2.5	0	0	0	0	0	0	1	0	0	0	0	-1	-1	-1	-1
553	Australia	Australian Capital Territory	Canberra	Weston Creek-Stromlo	10425.7	2006	3	10.68	1	9.68	0	0	0	0	0	2	0.04	0.04	164.78	5.34	0.21	0.21	0	0	0	0	0	9.3633	0.093633	90.6367	0.906367
554	Australia	Australian Capital Territory	Canberra	Woden Valley	2859.99	2006	3	0	0	0	0	0	0	0	0	0	0	0	0	1	0	0	1	0	0	0	0	-1	-1	-1	-1
555	Australia	Cocos (Keeling) Islands			2885.14	-9	9	0	0	0	0	0	0	0	0	0	0	0	0	1	0	0	1	0	0	0	0	-1	-1	-1	-1
556	Australia	New South Wales	Central West	Bathurst	24007	2006	3	1087	27.37	1057.92	1.71	1087	27.37	1057.92	1.71	448.28	551.25	448.28	2116217	2.42482	1336.68	1087	1	5.13145e+06	129207	4.99417e+06	8072.48	2.5179	0.0251794	97.3247	0.973247
557	Australia	New South Wales	Central West	Central Tablelands (excl. Bathurst & Orange)	2.21125e+06	2006	3	7448	1403.79	5947.9	96.31	7448	1403.79	5947.9	96.31	4301.29	4681.29	4301.24	21242518	1.73157	8106	7447.91	1	3.6783e+07	6.93281e+06	2.93745e+07	475640	18.8479	0.188479	79.859	0.79859
558	Australia	New South Wales	Central West	Lachlan	4.04306e+06	2006	3	42506.6	15360.7	26941.2	204.68	29413	10629.1	18642.3	141.64	36389.5	42670.6	35644.6	239217104	1.1681	49843.6	41636.4	0.706425	1.97396e+08	7.13336e+07	1.25112e+08	950572	36.1373	0.361373	63.3812	0.633812
559	Australia	New South Wales	Central West	Orange	28483	2006	3	721.76	203.27	518.49	0	661	186.16	474.84	0	1013.5	1092.4	1013.5	4588559	0.712146	777.95	721.76	0.915817	2.99264e+06	842828	2.14981e+06	0	28.1631	0.281631	71.8369	0.718369
560	Australia	New South Wales	Far West	Far West	1.46963e+07	2006	3	9449.24	223.06	9224.99	1.19	3655	86.28	3568.26	0.46	12253.9	12254	12253.9	166778928	0.77112	9449.29	9449.24	0.386804	4.97455e+07	1.17429e+06	4.85649e+07	6260.72	2.3606	0.0236061	97.6268	0.976268
561	Australia	New South Wales	Hunter	Hunter SD Bal	2.49823e+06	2006	3	49047.9	11841.6	36122.1	1084.22	30755	7425.13	22650	679.85	21348.1	21541.5	21348.1	97523536	2.29753	49492.2	49047.9	0.62704	1.40497e+08	3.39199e+07	1.03471e+08	3.10573e+06	24.1428	0.241428	73.6466	0.736466
562	Australia	New South Wales	Hunter	Newcastle	404702	2006	3	8266.11	379.04	7543.44	343.63	4736	217.17	4321.95	196.88	2393.9	2405.78	2393.9	8.12623e+06	3.45299	8307.13	8266.11	0.572942	1.60766e+07	737196	1.46711e+07	668321	4.5855	0.0458547	91.2574	0.912574
563	Australia	New South Wales	Illawarra	Illawarra SD Bal	700959	2006	3	5615	2340.55	3013.01	261.44	3092	1288.86	1659.17	143.97	1551.4	1551.58	1551.4	5.30675e+06	3.61931	5615.65	5615	0.550668	1.05766e+07	4.4087e+06	5.67539e+06	492466	41.6839	0.416839	53.66	0.5366
564	Australia	New South Wales	Illawarra	Nowra-Bomaderry	21022.4	2006	3	988.27	349.7	118.01	520.56	581	205.58	69.38	306.04	227.3	227.3	227.3	885112	4.34787	988.27	988.27	0.587896	2.26243e+06	800534	270167	1.19173e+06	35.3851	0.353851	11.9411	0.119411
565	Australia	New South Wales	Illawarra	Wollongong	108926	2006	3	358	167.1	190.66	0.24	358	167.1	190.66	0.24	230.8	230.86	230.8	524249	1.55113	358.09	358	1	813177	379558	433073	545.15	46.676	0.46676	53.257	0.53257
566	Australia	New South Wales	Mid-North Coast	Clarence (excl. Coffs Harbour)	1.44956e+06	2006	3	8386.09	647.15	7254.64	484.3	4713	363.7	4077.12	272.18	2645.93	2646.91	2645.92	5.72068e+06	3.16943	8389.2	8386.06	0.562004	1.01899e+07	786347	8.81504e+06	588474	7.7169	0.0771695	86.508	0.86508
567	Australia	New South Wales	Mid-North Coast	Coffs Harbour	21545.8	2006	3	998.49	196.73	794.35	7.41	281	55.36	223.55	2.09	547.48	547.48	547.48	1.22585e+06	1.82379	998.49	998.49	0.281425	629183	123956	500548	4679.69	19.7028	0.197028	79.5551	0.795551
568	Australia	New South Wales	Mid-North Coast	Hastings (excl. Port Macquarie)	1.07053e+06	2006	3	13931.2	3152.49	10591.2	187.5	6070	1373.58	4614.72	81.7	2906.44	2906.44	2906.44	10312432	4.79321	13931.2	13931.2	0.435713	2.15372e+07	4.87364e+06	1.63736e+07	289882	22.629	0.22629	76.0251	0.760251
569	Australia	New South Wales	Mid-North Coast	Port Macquarie	10759.2	2006	3	0	0	0	0	0	0	0	0	373.76	373.76	373.76	935923	0	0	0	1	0	0	0	0	-1	-1	-1	-1
570	Australia	New South Wales	Murray	Albury	187329	2006	3	561	141.32	419.68	0	561	141.32	419.68	0	552.78	587.6	549.36	1.65239e+06	1.01487	596.34	557.53	1	1.67696e+06	422439	1.25452e+06	0	25.1907	0.251907	74.8093	0.748093
571	Australia	New South Wales	Murray	Central Murray	12990.3	2006	3	3343.73	267.63	3076.09	0.01	1943	155.52	1787.48	0	4667.6	4859.93	4667.6	27869086	0.71637	3481.51	3343.73	0.581088	1.16012e+07	928571	1.06726e+07	0	8.0039	0.0800394	91.9958	0.919958
572	Australia	New South Wales	Murray	Central Murray	434455	2006	3	53477	8018.69	44103.1	1355.21	53477	8018.69	44103.1	1355.21	40247.9	42542.1	40246.6	243254560	1.32869	56525.3	53475.2	1	3.2321e+08	4.84642e+07	2.66555e+08	8.19077e+06	14.9947	0.149947	82.4712	0.824712
573	Australia	New South Wales	Murray	Central Murray	337536	2006	3	56631	1187.92	54933.9	509.2	56631	1187.92	54933.9	509.2	49166.9	47274.8	45933.4	257227920	1.15181	54451.6	52906.6	1.04002	3.08136e+08	6.46362e+06	2.98902e+08	2.77062e+06	2.0976	0.0209765	97.0032	0.970032
574	Australia	New South Wales	Murray	Central Murray	206655	2006	3	69411.6	7113.65	61424.8	873.14	57038	5845.54	50475	717.49	49339.2	49504.3	46677.6	216467280	1.40683	69643.9	65667.2	0.868592	2.64514e+08	2.71087e+07	2.34078e+08	3.32736e+06	10.2485	0.102485	88.4936	0.884936
575	Australia	New South Wales	Murray	Central Murray	875089	2006	3	73705.8	8831.08	64570.6	304.12	69612	8340.58	60984.2	287.23	61127.4	63863.9	61083.2	372548896	1.20577	77005.4	73652.6	0.94514	4.24566e+08	5.08695e+07	3.71945e+08	1.75183e+06	11.9815	0.119815	87.6059	0.876059
576	Australia	New South Wales	Murray	Central Murray	751967	2006	3	94030	378	93166.3	485.7	73269	294.54	72596	378.46	72854.4	75155.4	67605.1	456397888	1.29066	96999.8	87255	0.839712	4.94634e+08	1.98842e+06	4.90091e+08	2.55496e+06	0.402	0.00401999	99.0815	0.990815
577	Australia	New South Wales	Murray	Murray-Darling	4796848	2006	3	19119	37.59	19007.5	73.96	19119	37.59	19007.5	73.96	11748.3	12589.7	11748.3	109022200	1.62738	20488.3	19119	1	1.77421e+08	348829	1.76386e+08	686336	0.1966	0.00196611	99.4165	0.994165
578	Australia	New South Wales	Murray	Upper Murray (excl. Albury)	1.4259e+06	2006	3	22620	5043.83	17347.1	229.11	22620	5043.83	17347.1	229.11	11306.6	11754.6	10740.2	46389388	2.0006	23516.3	21487	1	9.28067e+07	2.06941e+07	7.11725e+07	940006	22.2981	0.222981	76.689	0.76689
579	Australia	New South Wales	Murrumbidgee	Central Murrumbidgee (excl. Wagga Wagga)	2.74294e+06	2006	3	24895	6029.91	18806.9	58.23	24895	6029.91	18806.9	58.23	11323.4	11914	10756.9	46053752	2.19855	26193.7	23649.6	1	1.01252e+08	2.45245e+07	7.64902e+07	236830	24.2214	0.242214	75.5447	0.755447
580	Australia	New South Wales	Murrumbidgee	Lower Murrumbidgee	1.89397e+06	2006	3	81239.6	35931.5	45301.9	6.08	52358	23157.5	29196.6	3.91	42299.3	48723.4	40008.5	296376256	1.92059	93577.7	76839.9	0.681391	3.87859e+08	1.71547e+08	2.16283e+08	28964.6	44.2291	0.442291	55.7634	0.557634
581	Australia	New South Wales	Murrumbidgee	Lower Murrumbidgee	1.13283e+06	2006	3	28957	8457.19	20423.2	76.58	28957	8457.19	20423.2	76.58	35681.2	39051.8	35111.7	306584384	0.811548	31692.4	28494.8	1	2.48808e+08	7.26669e+07	1.75483e+08	658000	29.206	0.29206	70.5295	0.705295
582	Australia	New South Wales	Murrumbidgee	Lower Murrumbidgee	350505	2006	3	179673	44404.7	134797	472.06	46124	11399.1	34603.7	121.18	43677.6	40516.6	38353.2	218514672	4.11363	166670	157771	0.292348	2.62788e+08	6.49458e+07	1.97152e+08	690414	24.7141	0.247141	75.0231	0.750231
583	Australia	New South Wales	Murrumbidgee	Lower Murrumbidgee	164047	2006	3	77124	3875.74	72518.4	729.83	77124	3875.74	72518.4	729.83	91094.7	87143.1	82890.9	565260096	0.846635	73778.4	70178.4	1.04535	5.0027e+08	2.51403e+07	4.70396e+08	4.73409e+06	5.0253	0.0502534	94.0284	0.940284
584	Australia	New South Wales	Murrumbidgee	Lower Murrumbidgee	116732	2006	3	51728.2	2728.34	48357.8	642.03	37037	1953.47	34623.8	459.69	31839.6	29456.6	27687.5	151750944	1.62465	47856.7	44982.5	0.823365	2.02994e+08	1.07067e+07	1.89768e+08	2.51949e+06	5.2744	0.0527438	93.4845	0.934845
585	Australia	New South Wales	Murrumbidgee	Wagga Wagga	22044.8	2006	3	404.56	151.64	251.81	1.11	201	75.34	125.11	0.55	303.57	326.92	288.79	1047934	1.33267	435.68	384.86	0.522268	729376	273389	453991	1995.8	37.4827	0.374827	62.2429	0.622429
586	Australia	New South Wales	North Western	Central Macquarie (excl. Dubbo)	3560657	2006	3	68354.8	31157.5	36990.3	206.96	25100	11441.1	13582.9	75.99	23235.5	25233.4	23235.4	159200752	2.94183	74232.4	68354.6	0.367203	1.71976e+08	7.83904e+07	9.30652e+07	520657	45.5821	0.455821	54.1151	0.541151
587	Australia	New South Wales	North Western	Dubbo	32988.8	2006	3	626	145.85	465.63	14.52	626	145.85	465.63	14.52	703.05	735.45	703.05	4.55334e+06	0.890406	654.85	626	1	4.05432e+06	944605	3.01568e+06	94039.6	23.2987	0.232987	74.3818	0.743818
588	Australia	New South Wales	North Western	Macquarie-Barwon	5.76314e+06	2006	3	68912.4	2412.59	66407.8	92	32652	1143.13	31465.3	43.59	38610.9	39652.3	38610.8	329979264	1.78479	70771.1	68912.2	0.47382	2.79053e+08	9.76952e+06	2.68911e+08	372533	3.501	0.0350095	96.3655	0.963655
589	Australia	New South Wales	North Western	Upper Darling	1.06477e+07	2006	3	20912.3	129.43	20780	2.86	10032	62.09	9968.54	1.37	12431.1	12572.3	12421.2	133554776	1.68227	21149.9	20895.8	0.480097	1.07866e+08	667601	1.07183e+08	14730.4	0.6189	0.00618917	99.3674	0.993674
590	Australia	New South Wales	Northern	North Central Plain	1.30307e+06	2006	3	87375.7	34219.8	50936.2	2219.7	51033	19986.6	29750	1296.45	52575.1	57617.6	52575.1	347366784	1.66192	95755.9	87375.7	0.584064	3.37178e+08	1.32052e+08	1.9656e+08	8.56572e+06	39.164	0.39164	58.2956	0.582956
591	Australia	New South Wales	Northern	North Central Plain	1.79277e+06	2006	3	79992.2	5841.05	73866.6	284.6	73550	5370.63	67917.7	261.69	84634.5	89808	84634.5	690369024	0.945148	84881.9	79992.2	0.919465	5.99952e+08	4.38086e+07	5.54009e+08	2.13462e+06	7.302	0.0730202	92.3422	0.923422
592	Australia	New South Wales	Northern	Northern Slopes (excl. Tamworth)	3.5637e+06	2006	3	45908.2	25677.3	20019.9	211.02	43801	24498.7	19101	201.33	24093	27109.5	24093	147865664	1.90546	51656.1	45908.2	0.954099	2.6882e+08	1.50356e+08	1.17228e+08	1.23562e+06	55.9318	0.559318	43.6086	0.436086
593	Australia	New South Wales	Northern	Northern Tablelands	3.26736e+06	2006	3	4014	163.95	3699.84	150.21	4014	163.95	3699.84	150.21	2044.69	2294.58	2044.67	9315882	1.96313	4504.57	4013.96	1	1.82883e+07	746978	1.6857e+07	684377	4.0845	0.0408445	92.1734	0.921734
594	Australia	New South Wales	Northern	Tamworth	48647.1	2006	3	10437.5	4501.56	5428.36	507.6	2699	1164.04	1403.7	131.26	1623.68	1983.23	1623.68	9519758	6.42831	12748.8	10437.5	0.258586	1.58244e+07	6.82485e+06	8.23e+06	769587	43.1286	0.431286	52.0081	0.520081
595	Australia	New South Wales	Richmond-Tweed	Lismore	16625.5	2006	3	382	59.35	305.92	16.73	382	59.35	305.92	16.73	651.71	651.71	651.71	2.25536e+06	0.58615	382	382	1	1.32198e+06	205391	1.05869e+06	57897.2	15.5366	0.155366	80.0838	0.800838
596	Australia	New South Wales	Richmond-Tweed	Richmond-Tweed SD Bal	989361	2006	3	16319.3	2249.15	13618.9	451.25	7662	1055.99	6394.15	211.86	6059.8	6298.9	6059.8	20810188	2.69305	16963.2	16319.3	0.469505	2.63124e+07	3.62642e+06	2.19584e+07	727556	13.7821	0.137821	83.4527	0.834527
597	Australia	New South Wales	Richmond-Tweed	Tweed Heads & Tweed Coast	23129.1	2006	3	930.4	148.75	739.85	41.8	439	70.18	349.09	19.73	881.67	881.67	881.67	2.60998e+06	1.05527	930.4	930.4	0.47184	1.29956e+06	207752	1.0334e+06	58406.1	15.9877	0.159877	79.5196	0.795196
598	Australia	New South Wales	South Eastern	Lower South Coast	969926	2006	3	20841.3	245.38	20556.8	39.21	6101	71.83	6017.69	11.48	4664.1	4665.36	4664.1	13597332	4.46846	20847	20841.3	0.292735	1.77864e+07	209407	1.75435e+07	33467.8	1.1774	0.0117737	98.6345	0.986345
599	Australia	New South Wales	South Eastern	Queanbeyan	157965	2006	3	231	80.04	148.45	2.51	231	80.04	148.45	2.51	26	25.15	25.09	99180.8	8.88462	223.45	222.91	1.03379	910957	315641	585418	9898.28	34.6494	0.346494	64.2641	0.642641
600	Australia	New South Wales	South Eastern	Snowy	1.51565e+06	2006	3	1000	54.95	943.54	1.51	1000	54.95	943.54	1.51	733.66	734.4	733.66	2595716	1.36303	1001.01	1000	1	3.53804e+06	194415	3.33828e+06	5342.44	5.495	0.05495	94.354	0.94354
601	Australia	New South Wales	South Eastern	Southern Tablelands (excl. Queanbeyan)	2.52342e+06	2006	3	7070	1589.52	5432.41	48.07	7070	1589.52	5432.41	48.07	3017.8	3180.75	2983.71	11752588	2.34277	7451.75	6990.14	1	2.75336e+07	6.19026e+06	2.11561e+07	187205	22.4826	0.224826	76.8375	0.768375
602	Australia	New South Wales	Sydney	Blacktown	24005.5	2006	3	998.75	10.33	890.25	98.17	139	1.44	123.9	13.66	145.4	145.45	145.4	433391	6.86898	999.09	998.75	0.139174	414315	4292.18	369307	40716.1	1.0343	0.0103429	89.1364	0.891364
603	Australia	New South Wales	Sydney	Canterbury-Bankstown	11038.4	2006	3	1.66	0.2	1.46	0	0	0	0	0	0	0	0	0	1	0	0	1	0	0	0	0	12.0482	0.120482	87.9518	0.879518
604	Australia	New South Wales	Sydney	Central Northern Sydney	94833.7	2006	3	1091	59.86	974.56	56.58	1091	59.86	974.56	56.58	853.58	853.6	853.58	2.85968e+06	1.27815	1091.03	1091	1	3.65509e+06	200544	3.26499e+06	189556	5.4867	0.0548671	89.3272	0.893272
605	Australia	New South Wales	Sydney	Central Western Sydney	13378.3	2006	3	28	0	28	0	28	0	28	0	0.5	0.5	0.5	1773.69	56	28	28	1	99326.6	0	99326.6	0	0	0	100	1
606	Australia	New South Wales	Sydney	Eastern Suburbs	5786.31	2006	3	0	0	0	0	0	0	0	0	0	0	0	0	1	0	0	1	0	0	0	0	-1	-1	-1	-1
607	Australia	New South Wales	Sydney	Fairfield-Liverpool	40705.2	2006	3	1186.67	4.09	990.25	192.33	639	2.2	533.23	103.57	316.8	317.05	316.8	1086481	3.7458	1187.61	1186.67	0.538482	2.19148e+06	7545.01	1.82874e+06	355198	0.3447	0.00344662	83.4478	0.834478
608	Australia	New South Wales	Sydney	Gosford-Wyong	168583	2006	3	1823	434.7	1382.51	5.79	1823	434.7	1382.51	5.79	1221.9	1221.9	1221.9	3.69081e+06	1.49194	1823	1823	1	5.50647e+06	1.31303e+06	4.17594e+06	17489	23.8453	0.238453	75.8371	0.758371
609	Australia	New South Wales	Sydney	Inner Sydney	7549.07	2006	3	0	0	0	0	0	0	0	0	11	11	11	25677.6	0	0	0	1	0	0	0	0	-1	-1	-1	-1
610	Australia	New South Wales	Sydney	Inner Western Sydney	4912.22	2006	3	0	0	0	0	0	0	0	0	0	0	0	0	1	0	0	1	0	0	0	0	-1	-1	-1	-1
611	Australia	New South Wales	Sydney	Lower Northern Sydney	9831.95	2006	3	0	0	0	0	0	0	0	0	0	0	0	0	1	0	0	1	0	0	0	0	-1	-1	-1	-1
612	Australia	New South Wales	Sydney	Northern Beaches	25411.1	2006	3	27	2.7	22.68	1.62	27	2.7	22.68	1.62	18.7	18.7	18.7	45601.8	1.44385	27	27	1	65842.2	6584.22	55307.4	3950.53	10	0.1	84	0.84
613	Australia	New South Wales	Sydney	Outer South Western Sydney	307004	2006	3	9322.81	868.45	8324.75	129.61	3002	279.65	2680.62	41.73	2789	2792.34	2789	10027681	3.34271	9333.97	9322.81	0.322006	1.07935e+07	1.00546e+06	9.63801e+06	150038	9.3153	0.0931532	89.2944	0.892944
614	Australia	New South Wales	Sydney	Outer Western Sydney	461239	2006	3	5624.18	91.54	5298.22	234.42	3876	63.08	3651.36	161.56	2816.12	2823.36	2816.12	8.27693e+06	1.99714	5638.64	5624.18	0.689167	1.1392e+07	185400	1.07318e+07	474845	1.6276	0.0162762	94.2043	0.942043
615	Australia	New South Wales	Sydney	St George-Sutherland	40010.8	2006	3	39.75	13.71	23.3	2.74	13	4.48	7.62	0.9	6.2	6.2	6.2	20460.7	6.41129	39.75	39.75	0.327044	42901.5	14784.5	25146.9	2970.1	34.4906	0.344906	58.6164	0.586164
616	Australia	Northern Territory	Darwin	Darwin City	11208.6	2006	3	66	44.21	21.79	0	66	44.21	21.79	0	55.03	55.03	55.03	546104	1.19935	66	66	1	654968	438729	216239	0	66.9848	0.669848	33.0152	0.330152
617	Australia	Northern Territory	Darwin	Litchfield Shire	291435	2006	3	6880.66	6717.54	163.12	0	3634	3547.85	86.15	0	2059.98	2059.98	2059.98	20378012	3.34016	6880.66	6880.66	0.528147	3.59487e+07	3.50965e+07	852225	0	97.6293	0.976293	2.3707	0.023707
618	Australia	Northern Territory	Darwin	Palmerston-East Arm	9559.63	2006	3	23.65	20	3.65	0	0	0	0	0	0	0	0	0	1	0	0	1	0	0	0	0	84.5666	0.845666	15.4334	0.154334
619	Australia	Northern Territory	Northern Territory - Bal	Alligator	5.90034e+06	2006	3	482	424.83	57.17	0	482	424.83	57.17	0	0	0	0	0	1	0	0	1	4.17642e+06	3.68106e+06	495365	0	88.139	0.88139	11.861	0.11861
620	Australia	Northern Territory	Northern Territory - Bal	Barkly	3.0403e+07	2006	3	93	41.14	51.86	0	93	41.14	51.86	0	73.01	73.01	73.01	1.16332e+06	1.2738	93	93	1	1.48184e+06	655515	826325	0	44.2366	0.442366	55.7634	0.557634
621	Australia	Northern Territory	Northern Territory - Bal	Bathurst-Melville	749201	2006	3	0	0	0	0	0	0	0	0	0	0	0	0	1	0	0	1	0	0	0	0	-1	-1	-1	-1
622	Australia	Northern Territory	Northern Territory - Bal	Central NT	5.48402e+07	2006	3	397	251.71	144.31	0.98	397	251.71	144.31	0.98	530.13	530.13	530.13	7.76213e+06	0.748873	397	397	1	5.81285e+06	3.68552e+06	2.11298e+06	14349.1	63.403	0.63403	36.3501	0.363501
623	Australia	Northern Territory	Northern Territory - Bal	Daly	3.76788e+06	2006	3	19	3.16	15.84	0	19	3.16	15.84	0	214.2	214.2	214.2	2198717	0.0887021	19	19	1	195031	32436.7	162594	0	16.6316	0.166316	83.3684	0.833684
624	Australia	Northern Territory	Northern Territory - Bal	East Arnhem	3.84331e+06	2006	3	0	0	0	0	0	0	0	0	0	0	0	0	1	0	0	1	0	0	0	0	-1	-1	-1	-1
625	Australia	Northern Territory	Northern Territory - Bal	Finniss	785045	2006	3	344	103.14	240.86	0	344	103.14	240.86	0	88.04	88.04	88.04	897868	3.90731	344	344	1	3.50825e+06	1.05186e+06	2.45639e+06	0	29.9826	0.299826	70.0174	0.700174
626	Australia	Northern Territory	Northern Territory - Bal	Lower Top End NT	3.46163e+07	2006	3	3706.75	2409.52	1294.81	2.42	2224	1445.68	776.87	1.45	2980.2	2980.2	2980.2	34546464	1.24379	3706.75	3706.75	0.599987	2.57806e+07	1.67583e+07	9.00547e+06	16808.4	65.0036	0.650036	34.9311	0.349311
627	Australia	Other Territories	Other Territories	Other Territories	21862.3	2006	3	0	0	0	0	0	0	0	0	0	0	0	0	1	0	0	1	0	0	0	0	-1	-1	-1	-1
628	Australia	Queensland	Brisbane	Beaudesert Shire Part A	54539.3	2006	3	4666.13	379.74	4114.27	172.12	1438	117.03	1267.93	53.04	736.59	753.32	736.59	3384447	6.33477	4772.11	4666.13	0.308178	6.60725e+06	537724	5.82582e+06	243706	8.1382	0.0813822	88.1731	0.881731
629	Australia	Queensland	Brisbane	Caboolture Shire	122440	2006	3	2253	66.6	2160.9	25.5	2253	66.6	2160.9	25.5	1951.01	1951.01	1951.01	9941293	1.15479	2253	2253	1	1.14801e+07	339358	1.10108e+07	129934	2.9561	0.0295606	95.9121	0.959121
630	Australia	Queensland	Brisbane	Inner Brisbane	2824.81	2006	3	0	0	0	0	0	0	0	0	0	0	0	0	1	0	0	1	0	0	0	0	-1	-1	-1	-1
631	Australia	Queensland	Brisbane	Ipswich City	120374	2006	3	4966.29	1949.26	2948.22	68.81	1588	623.29	942.71	22	3320.45	3330.24	3320.43	11671534	1.49567	4980.93	4966.26	0.319758	5.58193e+06	2.19091e+06	3.31369e+06	77331.5	39.2498	0.392498	59.3646	0.593646
632	Australia	Queensland	Brisbane	Logan City	25148	2006	3	3213.34	121.62	3047	44.72	102	3.86	96.72	1.42	165.44	165.54	165.44	685327	19.423	3215.28	3213.34	0.0317427	422530	15989.9	400658	5882.28	3.7848	0.0378485	94.8235	0.948235
633	Australia	Queensland	Brisbane	Northwest Inner Brisbane	8682.8	2006	3	0	0	0	0	0	0	0	0	0	0	0	0	1	0	0	1	0	0	0	0	-1	-1	-1	-1
634	Australia	Queensland	Brisbane	Northwest Outer Brisbane	65853.9	2006	3	61	7.89	49.96	3.15	61	7.89	49.96	3.15	567.37	567.66	567.37	2117443	0.107514	61.03	61	1	227654	29445.7	186452	11755.9	12.9344	0.129344	81.9016	0.819016
635	Australia	Queensland	Brisbane	Pine Rivers Shire	77453	2006	3	3022.08	160.61	2001.31	860.16	350	18.6	231.78	99.62	870.5	870.79	870.5	3.71767e+06	3.47166	3023.09	3022.08	0.115814	1.49475e+06	79435.5	989869	425450	5.3146	0.0531455	66.2229	0.662229
636	Australia	Queensland	Brisbane	Redcliffe City	3813.29	2006	3	0.73	0.13	0.6	0	0	0	0	0	0	0	0	0	1	0	0	1	0	0	0	0	17.8082	0.178082	82.1918	0.821918
637	Australia	Queensland	Brisbane	Redland Shire	53711.3	2006	3	2508.24	568.35	1916.09	23.8	199	45.09	152.02	1.89	891.99	891.99	891.99	2.05117e+06	2.81196	2508.24	2508.24	0.0793385	457609	103686	349576	4346.13	22.6593	0.226593	76.3918	0.763918
638	Australia	Queensland	Brisbane	Southeast Outer Brisbane	47864.2	2006	3	1650.45	495.85	1017.28	137.32	308	92.53	189.84	25.63	400.45	400.45	400.45	1.59161e+06	4.12149	1650.45	1650.45	0.186616	1.22416e+06	367766	754530	101868	30.0433	0.300433	61.6365	0.616365
639	Australia	Queensland	Brisbane	Southeast Inner Brisbane	7451.51	2006	3	0	0	0	0	0	0	0	0	0	0	0	0	1	0	0	1	0	0	0	0	-1	-1	-1	-1
640	Australia	Queensland	Central West	Central West	3.74744e+07	2006	3	1001	200.27	792.12	8.61	1001	200.27	792.12	8.61	355.97	356.89	355.94	3918637	2.81203	1003.59	1000.92	1	1.10193e+07	2.20464e+06	8.71992e+06	94781.8	20.007	0.20007	79.1329	0.791329
641	Australia	Queensland	Darling Downs	Darling Downs SD Bal	86750.9	2006	3	6406.17	4913.66	1450.37	42.14	3296	2528.1	746.22	21.68	2099.5	2136.1	2099.5	12399969	3.05128	6517.85	6406.17	0.514504	1.94667e+07	1.49313e+07	4.40729e+06	128045	76.702	0.76702	22.6402	0.226402
642	Australia	Queensland	Darling Downs	Darling Downs SD Bal	587675	2006	3	4925	879.6	4041.91	3.49	4925	879.6	4041.91	3.49	3882.6	4490.79	3882.6	22114660	1.26848	5696.48	4925	1	2.8052e+07	5.01006e+06	2.30221e+07	19878.5	17.8599	0.178599	82.0692	0.820692
643	Australia	Queensland	Darling Downs	Darling Downs SD Bal	150780	2006	3	1049	272.75	750.86	25.39	1049	272.75	750.86	25.39	879.5	883.45	879.49	5476581	1.19272	1053.71	1048.99	1	6.53204e+06	1.69839e+06	4.67555e+06	158102	26.001	0.26001	71.5786	0.715786
644	Australia	Queensland	Darling Downs	Darling Downs SD Bal	2507.45	2006	3	248	176.52	71.48	0	248	176.52	71.48	0	35.5	43.85	35.5	169287	6.98592	306.33	248	1	1.18262e+06	841761	340863	0	71.1774	0.711774	28.8226	0.288226
645	Australia	Queensland	Darling Downs	Darling Downs SD Bal	69456.8	2006	3	6889.51	4871.4	1990.43	27.68	2534	1791.73	732.09	10.18	1741.99	1885.73	1741.99	8108516	3.95497	7458	6889.51	0.367806	1.17951e+07	8.34004e+06	3.40769e+06	47385.3	70.7075	0.707075	28.8907	0.288907
646	Australia	Queensland	Darling Downs	Darling Downs SD Bal	197436	2006	3	2017	701.16	1102.49	213.35	2017	701.16	1102.49	213.35	1827.55	1836.36	1827.55	9703179	1.10366	2026.72	2017	1	1.0709e+07	3.72273e+06	5.85355e+06	1.13276e+06	34.7625	0.347625	54.6599	0.546599
647	Australia	Queensland	Darling Downs	Darling Downs SD Bal	4785.04	2006	3	378.08	0	330.82	47.26	92	0	80.5	11.5	2.65	2.68	2.65	20971.3	142.67	382.36	378.08	0.243335	728060	0	637052	91007.4	0	0	87.5	0.875
648	Australia	Queensland	Darling Downs	Darling Downs SD Bal	177641	2006	3	18559.5	10788.6	7344.76	426.04	12067	7014.57	4775.42	277.01	12012.3	13615.4	12012.3	93197096	1.54503	21036.3	18559.5	0.650181	9.36212e+07	5.44222e+07	3.70498e+07	2.14917e+06	58.1302	0.581302	39.5742	0.395742
649	Australia	Queensland	Darling Downs	Darling Downs SD Bal	570971	2006	3	17351	4676.15	12176.5	498.31	17351	4676.15	12176.5	498.31	12845.2	13309.8	12845.2	102487888	1.35077	17978.5	17351	1	1.38438e+08	3.73094e+07	9.71526e+07	3.97585e+06	26.9503	0.269503	70.1777	0.701777
650	Australia	Queensland	Darling Downs	Darling Downs SD Bal	1.34009e+06	2006	3	50921.4	1730.92	48844.3	346.18	32606	1108.34	31276	221.67	18422.5	18597.8	18422.5	137073248	2.76408	51405.8	50921.4	0.640321	2.42606e+08	8.24662e+06	2.3271e+08	1.64934e+06	3.3992	0.033992	95.921	0.95921
651	Australia	Queensland	Darling Downs	Darling Downs SD Bal	452078	2006	3	15941.2	4128.49	11124.9	687.87	12913	3344.23	9011.57	557.2	17887.6	21032.4	17887.6	127214080	0.89119	18743.9	15941.2	0.810038	9.18356e+07	2.37837e+07	6.40891e+07	3.96273e+06	25.8982	0.258982	69.7868	0.697868
652	Australia	Queensland	Darling Downs	Darling Downs SD Bal	1.16823e+06	2006	3	3699	1287.39	2196.12	215.49	3699	1287.39	2196.12	215.49	2196.4	2211.37	2196.39	17681776	1.68412	3724.21	3698.98	1	2.97782e+07	1.03639e+07	1.76795e+07	1.73477e+06	34.8037	0.348037	59.3706	0.593706
653	Australia	Queensland	Darling Downs	Darling Downs SD Bal	55069.1	2006	3	3309.39	2728.51	576.63	4.25	967	797.27	168.49	1.24	1656.77	1880.02	1656.77	9122757	1.9975	3755.33	3309.39	0.292199	5.32464e+06	4.39005e+06	927765	6827.88	82.4475	0.824475	17.4241	0.174241
654	Australia	Queensland	Darling Downs	Darling Downs SD Bal	1.86445e+06	2006	3	781.29	119.06	658.06	4.17	431	65.68	363.02	2.3	178.85	188.26	178.84	1.44662e+06	4.36841	822.4	781.25	0.55168	3.48629e+06	531275	2.93641e+06	18604.3	15.2389	0.152389	84.2274	0.842274
655	Australia	Queensland	Darling Downs	Darling Downs SD Bal	269761	2006	3	6518.67	544.11	5840.31	134.25	5099	425.61	4568.38	105.01	4360.71	5282.68	4360.71	14102952	1.49486	7896.89	6518.67	0.782215	1.64907e+07	1.37646e+06	1.47746e+07	339612	8.3469	0.0834695	89.5936	0.895936
656	Australia	Queensland	Darling Downs	Darling Downs SD Bal	870034	2006	3	2753.88	157.18	2579.23	17.47	2333	133.16	2185.04	14.8	1966.87	2150.71	1966.86	16086483	1.40013	3011.28	2753.87	0.847171	1.9081e+07	1.08908e+06	1.78709e+07	121046	5.7076	0.0570758	93.658	0.93658
657	Australia	Queensland	Darling Downs	Darling Downs SD Bal	210705	2006	3	2107.51	1268.97	796.94	41.6	1529	920.64	578.18	30.18	1428.11	1615.15	1428.11	9995958	1.47573	2383.53	2107.51	0.725501	1.07021e+07	6.44396e+06	4.04693e+06	211243	60.2118	0.602118	37.8143	0.378143
658	Australia	Queensland	Darling Downs	Darling Downs SD Bal	108955	2006	3	17925.1	7696.41	10181.2	47.52	11035	4738.03	6267.71	29.26	10615	12452.4	10615	74900776	1.68866	21027.9	17925.1	0.615617	7.78644e+07	3.34321e+07	4.42258e+07	206462	42.9364	0.429364	56.7985	0.567985
659	Australia	Queensland	Darling Downs	Darling Downs SD Bal	607581	2006	3	2618	191.16	2378.94	47.9	2618	191.16	2378.94	47.9	855.73	868.27	855.73	7239894	3.05938	2656.36	2618	1	2.21496e+07	1.61731e+06	20126995	405257	7.3018	0.0730176	90.8686	0.908686
660	Australia	Queensland	Darling Downs	Darling Downs SD Bal	172826	2006	3	6146.89	4273.59	1855.92	17.38	1768	1229.19	533.81	5	1558.29	1612.84	1558.29	6.5504e+06	3.94464	6362.07	6146.89	0.287625	7.43194e+06	5.167e+06	2.24392e+06	21017.9	69.5244	0.695244	30.1928	0.301928
661	Australia	Queensland	Darling Downs	Toowoomba	55372.1	2006	3	4883.16	3466.31	1396.26	20.59	2450	1739.13	700.54	10.33	1090.61	1213.27	1090.61	6.28993e+06	4.47746	5432.36	4883.16	0.501724	1.413e+07	1.00302e+07	4.04026e+06	59576.8	70.985	0.70985	28.5934	0.285934
662	Australia	Queensland	Far North	Cairns City Part A	48900.6	2006	3	424	244.65	178.7	0.65	424	244.65	178.7	0.65	225.48	225.48	225.48	822550	1.88043	424	424	1	1.54675e+06	892482	651897	2371.2	57.7005	0.577005	42.1462	0.421462
663	Australia	Queensland	Far North	Far North SD Bal	2.72673e+07	2006	3	46780.9	5585.64	40211.7	983.55	33109	3953.22	28459.7	696.1	29421.1	29423.7	29420.7	138300336	1.59005	46784.9	46780.2	0.707756	1.55638e+08	1.85832e+07	1.33783e+08	3.27222e+06	11.94	0.1194	85.9575	0.859575
664	Australia	Queensland	Fitzroy	Fitzroy SD Bal	1.21913e+07	2006	3	47584	4352.97	42542.2	688.83	47584	4352.97	42542.2	688.83	43528.2	44035.9	43528.1	346627392	1.09318	48139.1	47583.9	1	3.78925e+08	3.46639e+07	3.38776e+08	5.48535e+06	9.148	0.0914797	89.4044	0.894044
665	Australia	Queensland	Fitzroy	Gladstone	60290	2006	3	621	16.88	555.19	48.93	621	16.88	555.19	48.93	606.92	617.07	606.92	5.31191e+06	1.0232	631.39	621	1	5.43515e+06	147738	4.85916e+06	428247	2.7182	0.027182	89.4026	0.894026
666	Australia	Queensland	Fitzroy	Rockhampton	45050.2	2006	3	1071	366.05	677.81	27.14	1071	366.05	677.81	27.14	1863.26	1863.29	1863.26	17508586	0.574799	1071.02	1071	1	1.00639e+07	3.43968e+06	6.36921e+06	255028	34.1783	0.341783	63.2876	0.632876
667	Australia	Queensland	Gold Coast	Gold Coast North	29918.5	2006	3	165	29.73	89.45	45.82	165	29.73	89.45	45.82	195.38	195.47	195.38	581962	0.844508	165.08	165	1	491472	88554.3	266437	136480	18.0182	0.180182	54.2121	0.542121
668	Australia	Queensland	Gold Coast	Gold Coast East	10388.8	2006	3	0	0	0	0	0	0	0	0	26.97	26.97	26.97	83130.4	0	0	0	1	0	0	0	0	-1	-1	-1	-1
669	Australia	Queensland	Gold Coast	Gold Coast SD Bal	77628.1	2006	3	980	169.41	810.26	0.33	980	169.41	810.26	0.33	52.87	52.87	52.87	189018	18.536	980	980	1	3.50364e+06	605664	2.89679e+06	1179.8	17.2867	0.172867	82.6796	0.826796
670	Australia	Queensland	Gold Coast	Gold Coast West	69023.9	2006	3	654.19	27.65	551.94	74.6	246	10.4	207.55	28.05	602.07	602.44	602.06	1.6442e+06	1.08657	654.59	654.18	0.376043	671816	28402	566811	76603.4	4.2266	0.042266	84.37	0.8437
671	Australia	Queensland	Mackay	Mackay City Part A	25984.4	2006	3	7903	2823.99	4748.25	330.76	7903	2823.99	4748.25	330.76	3808.37	3808.37	3808.37	22685468	2.07517	7903	7903	1	4.70761e+07	1.68218e+07	2.82841e+07	1.97025e+06	35.7331	0.357331	60.0816	0.600816
672	Australia	Queensland	Mackay	Mackay SD Bal	9.00867e+06	2006	3	74368	17779	54390.6	2198.41	74368	17779	54390.6	2198.41	82589.6	82777.2	82589.4	503476928	0.900453	74536.9	74367.9	1	4.53357e+08	1.08383e+08	3.31572e+08	1.34018e+07	23.9068	0.239068	73.137	0.73137
673	Australia	Queensland	North West	North West	3.08094e+07	2006	3	3223	910.72	2291.53	20.75	3223	910.72	2291.53	20.75	290.06	290.03	290.03	3435136	11.111	3222.52	3222.52	1.0001	3.81734e+07	1.07866e+07	2.7141e+07	245764	28.2569	0.282569	71.0993	0.710993
674	Australia	Queensland	Northern	Northern SD Bal	7.95832e+06	2006	3	111643	48158.7	61839.7	1644.63	88871	38335.7	49226.2	1309.17	93477.6	93509.2	93475.9	589506240	1.19433	111681	111641	0.796043	5.60466e+08	2.41764e+08	3.10445e+08	8256292	43.1363	0.431363	55.3906	0.553906
675	Australia	Queensland	Northern	Thuringowa City Part A	16521.4	2006	3	60	47.81	10.42	1.77	60	47.81	10.42	1.77	663.4	664.75	663.38	3.54085e+06	0.0904432	60.12	60	1	320246	255183	55616.1	9447.26	79.6833	0.796833	17.3667	0.173667
676	Australia	Queensland	Northern	Townsville City Part A	29006.6	2006	3	6	4.32	1.68	0	6	4.32	1.68	0	304.39	304.57	304.39	2.53272e+06	0.0197116	6	6	1	49923.9	35945.2	13978.7	0	72	0.72	28	0.28
677	Australia	Queensland	South West	South West	3.19882e+07	2006	3	33459.2	1156.5	32212.8	89.89	28018	968.42	26974.3	75.28	30779.6	30803.4	30779.5	275738112	1.08706	33485.1	33459.1	0.837381	2.51e+08	8.6756e+06	2.4165e+08	674397	3.4564	0.0345644	96.2749	0.962749
678	Australia	Queensland	Sunshine Coast	Sunshine Coast SD Bal	266210	2006	3	3799	306.64	3449.22	43.14	3799	306.64	3449.22	43.14	4281.12	4281.12	4281.12	24898866	0.887385	3799	3799	1	2.20949e+07	1.78341e+06	2.00606e+07	250901	8.0716	0.080716	90.7928	0.907928
679	Australia	Queensland	Sunshine Coast	Sunshine Coast	46242.1	2006	3	1474.2	42.51	1363.38	68.31	350	10.09	323.69	16.22	607.6	607.6	607.6	2.54459e+06	2.42627	1474.2	1474.2	0.237417	1.46578e+06	42256.2	1.35559e+06	67928.2	2.8836	0.028836	92.4827	0.924827
680	Australia	Queensland	West Moreton	Lower West Moreton	603994	2006	3	58797.1	37904.8	20347.6	544.73	21305	13734.7	7372.9	197.38	26585.1	26942.7	26584.4	80716832	2.21165	59587.9	58795.5	0.362358	6.46872e+07	4.1702e+07	2.23859e+07	599294	64.4671	0.644671	34.6064	0.346064
681	Australia	Queensland	West Moreton	Upper West Moreton	538153	2006	3	7825	3654.51	3873.21	297.28	7825	3654.51	3873.21	297.28	8006.97	8039.42	8006.71	29387302	0.977274	7856.71	7824.75	1	2.87194e+07	1.34128e+07	1.42155e+07	1.09108e+06	46.703	0.46703	49.4979	0.494979
682	Australia	Queensland	Wide Bay-Burnett	Bundaberg	25259	2006	3	9569.26	2747.95	6411.72	409.59	6660	1912.51	4462.42	285.07	2893.47	2895.73	2893.46	18226030	3.30719	9576.73	9569.23	0.695981	4.19516e+07	1.2047e+07	2.8109e+07	1.79567e+06	28.7164	0.287164	67.0033	0.670033
683	Australia	Queensland	Wide Bay-Burnett	Hervey Bay City Part A	37395.4	2006	3	5053.4	2.73	2001.16	3049.51	613	0.33	242.75	369.92	538.99	559.9	538.98	2009469	9.37568	5249.45	5053.31	0.121307	2.28543e+06	1230.33	905040	1.37916e+06	0.054	0.00054023	39.6003	0.396003
684	Australia	Queensland	Wide Bay-Burnett	Wide Bay-Burnett SD Bal	5.17503e+06	2006	3	115816	24346.7	89746	1723.35	82865	17419.8	64212.2	1233.04	96335.4	97656.9	96333.3	515746080	1.20222	117405	115813	0.715504	4.4364e+08	9.32614e+07	3.43777e+08	6.60141e+06	21.0219	0.210219	77.4901	0.774901
685	Australia	South Australia	Adelaide	Eastern Adelaide	33190.3	2006	3	2601.73	1703	788.37	110.36	1061	694.49	321.5	45.01	956.63	958.3	956.63	3298509	2.71968	2606.27	2601.73	0.407806	3.65838e+06	2.39464e+06	1.10855e+06	155197	65.4564	0.654564	30.3018	0.303018
686	Australia	South Australia	Adelaide	Northern Adelaide	67219.7	2006	3	8299.44	5005.57	290.78	3003.09	3743	2257.48	131.14	1354.38	2390.93	2430.14	2390.93	9757793	3.47122	8435.55	8299.44	0.450994	1.52758e+07	9.21316e+06	535205	5.52746e+06	60.3121	0.603121	3.5036	0.0350361
687	Australia	South Australia	Adelaide	Southern Adelaide	66323.7	2006	3	11350.4	6979.87	2247.19	2123.31	7361	4526.62	1457.36	1377.02	5149.15	5160.84	5149.14	20484390	2.20432	11376.1	11350.4	0.648526	2.92836e+07	1.80079e+07	5.79769e+06	5.47808e+06	61.4946	0.614946	19.7984	0.197984
688	Australia	South Australia	Adelaide	Western Adelaide	15955.1	2006	3	0	0	0	0	0	0	0	0	203.25	203.25	203.25	320070	0	0	0	1	0	0	0	0	-1	-1	-1	-1
689	Australia	South Australia	Eyre	Lincoln	3.71744e+06	2006	3	1344	280.7	1054.25	9.05	1344	280.7	1054.25	9.05	170.18	180.37	170.06	1.16521e+06	7.89752	1424.48	1343.05	1	9.20227e+06	1.92193e+06	7.21837e+06	61964.7	20.8854	0.208854	78.4412	0.784412
690	Australia	South Australia	Eyre	West Coast	3.52551e+06	2006	3	7	1.25	5.65	0.1	7	1.25	5.65	0.1	0	0	0	0	1	0	0	1	27487.5	4908.49	22186.4	392.68	17.8571	0.178571	80.7143	0.807143
691	Australia	South Australia	Murray Lands	Murray Mallee	2.09604e+06	2006	3	22210	10625.8	11151.8	432.38	22210	10625.8	11151.8	432.38	14554.8	14701.1	14554.7	74909552	1.52596	22433.3	22209.9	1	1.14309e+08	5.46881e+07	5.73955e+07	2.22534e+06	47.8424	0.478424	50.2109	0.502109
692	Australia	South Australia	Murray Lands	Riverland	2.72494e+06	2006	3	51937.3	793.17	50160.1	984.01	40959	625.51	39557.5	776.02	37036.7	38288.6	37036.7	236085296	1.40232	53692.8	51937.2	0.788625	2.61087e+08	3.98723e+06	2.52154e+08	4.94663e+06	1.5272	0.0152717	96.5782	0.965782
693	Australia	South Australia	Northern	Far North	6.71608e+07	2006	3	130	31.43	98.57	0	130	31.43	98.57	0	0	0	0	0	1	0	0	1	1.02152e+06	246972	774548	0	24.1769	0.241769	75.8231	0.758231
694	Australia	South Australia	Northern	Flinders Ranges	7.50452e+06	2006	3	488	233.23	246.77	8	488	233.23	246.77	8	151.95	155.57	151.93	1.06142e+06	3.21158	499.63	487.94	1	3.40885e+06	1.62919e+06	1.72377e+06	55882.8	47.793	0.47793	50.5676	0.505676
695	Australia	South Australia	Northern	Pirie	4.93683e+06	2006	3	215	70.31	142.48	2.21	215	70.31	142.48	2.21	70.07	73.43	70.06	350509	3.06836	225.31	214.97	1	1.07549e+06	351710	712723	11055	32.7023	0.327023	66.2698	0.662698
696	Australia	South Australia	Northern	Whyalla	1.35139e+06	2006	3	0	0	0	0	0	0	0	0	0	0	0	0	1	0	0	1	0	0	0	0	-1	-1	-1	-1
697	Australia	South Australia	Outer Adelaide	Barossa	310319	2006	3	14083	4243.72	7805.79	2033.49	14083	4243.72	7805.79	2033.49	8719.69	8834.09	8719.68	39260012	1.61508	14267.8	14083	1	6.34081e+07	1.91072e+07	3.51452e+07	9.1557e+06	30.1336	0.301336	55.427	0.55427
698	Australia	South Australia	Outer Adelaide	Fleurieu	296290	2006	3	16787.8	5340.23	11312.8	134.7	15800	5026.01	10647.2	126.78	9207.71	9311.06	9207.71	44926088	1.82323	16976.2	16787.8	0.941161	7.70911e+07	2.45228e+07	5.19497e+07	618583	31.8102	0.318102	67.3874	0.673874
699	Australia	South Australia	Outer Adelaide	Kangaroo Island	440022	2006	3	732	1.33	728.83	1.84	732	1.33	728.83	1.84	69.01	69	69	161567	10.607	731.88	731.88	1.00015	1.71403e+06	3114.29	1.70661e+06	4308.49	0.1817	0.00181694	99.5669	0.995669
700	Australia	South Australia	Outer Adelaide	Mt Lofty Ranges	116586	2006	3	13416.2	7713.25	5667.94	35.04	8523	4900.04	3600.7	22.26	5739.57	5788.94	5739.57	22891958	2.3375	13531.6	13416.2	0.635275	3.39935e+07	1.95435e+07	1.43612e+07	88782.8	57.4919	0.574919	42.2469	0.422469
701	Australia	South Australia	South East	Lower South East	585415	2006	3	29608.1	26493.4	3110.61	4.06	28870	25833	3033.07	3.96	23538.1	23574.4	23538	93465080	1.25788	29653.7	29607.9	0.975077	1.14638e+08	1.02578e+08	1.20438e+07	15724.5	89.4803	0.894803	10.506	0.10506
702	Australia	South Australia	South East	Upper South East	1.54733e+06	2006	3	61795	52517.4	8525.15	752.45	61795	52517.4	8525.15	752.45	45809.2	46069.6	45809.2	185402672	1.34896	62146.3	61794.9	1	2.50102e+08	2.12553e+08	3.45037e+07	3.04537e+06	84.9865	0.849865	13.7959	0.137959
703	Australia	South Australia	Yorke and Lower North	Lower North	1.20806e+06	2006	3	6601	2875.25	3339.64	386.11	6601	2875.25	3339.64	386.11	3118.01	3182.1	3118	16628630	2.11706	6736.68	6600.98	1	3.52037e+07	1.5334e+07	1.78106e+07	2.05916e+06	43.5578	0.435578	50.5929	0.505929
704	Australia	South Australia	Yorke and Lower North	Yorke	828275	2006	3	2919	349.78	2457.78	111.44	2919	349.78	2457.78	111.44	5.25	5.47	5.24	9537.05	556	3041.32	2913.44	1	5.3026e+06	635404	4.46476e+06	202440	11.9829	0.119829	84.1994	0.841994
705	Australia	Tasmania	Greater Hobart	Greater Hobart	135744	2006	3	2689	145	2275.59	268.41	2689	145	2275.59	268.41	8628.88	8749.45	8628.88	12238659	0.311628	2726.57	2689	1	3.81391e+06	205659	3.22755e+06	380696	5.3923	0.0539234	84.6259	0.846259
706	Australia	Tasmania	Mersey-Lyell	Burnie-Devonport	62007.9	2006	3	12692.5	2029.06	10623.1	40.35	6716	1073.64	5621.01	21.35	19727.9	19969.3	19727.9	32288706	0.643378	12847.8	12692.5	0.529131	1.09921e+07	1.75723e+06	9.19991e+06	34943.6	15.9863	0.159863	83.6958	0.836958
707	Australia	Tasmania	Mersey-Lyell	Lyell	957464	2006	3	0	0	0	0	0	0	0	0	515.73	526.26	515.73	843755	0	0	0	1	0	0	0	0	-1	-1	-1	-1
708	Australia	Tasmania	Mersey-Lyell	North Western Rural	1.22979e+06	2006	3	28104	4495.41	23542.1	66.53	20053	3207.6	16797.9	47.47	0	0	0	0	1	0	0	1	3.27081e+07	5.23186e+06	2.73988e+07	77427.5	15.9956	0.159956	83.7677	0.837677
709	Australia	Tasmania	Northern	Central North	1.03976e+06	2006	3	24434	984.34	23270.7	178.93	24434	984.34	23270.7	178.93	16813.3	17074.6	16813.3	41746760	1.45325	24813.7	24434	1	6.06687e+07	2.44408e+06	5.77803e+07	444276	4.0286	0.0402857	95.2391	0.952391
710	Australia	Tasmania	Northern	Greater Launceston	80269.5	2006	3	3613.07	14.49	3044.87	553.71	1849	7.42	1558.22	283.36	6256.29	6339.71	6256.29	20525676	0.57751	3661.25	3613.07	0.511753	6.06621e+06	24343.6	5.11222e+06	929649	0.401	0.00401044	84.2738	0.842738
711	Australia	Tasmania	Northern	North Eastern	873848	2006	3	11522.5	156.03	11299.4	67.14	10061	136.24	9866.14	58.62	9187.68	9378.1	9187.68	34240832	1.25413	11761.3	11522.5	0.873159	3.74955e+07	507742	3.67693e+07	218466	1.3541	0.0135413	98.0632	0.980632
712	Australia	Tasmania	Southern	Southern	2.41253e+06	2006	3	16426.2	304.99	15862.1	259.13	15359	285.18	14831.5	242.29	0	0	0	0	1	0	0	1	2.45409e+07	455666	2.36981e+07	387136	1.8567	0.0185673	96.5657	0.965657
713	Australia	Victoria	Barwon	East Barwon	186749	2006	3	1243	146.08	820.7	276.22	1243	146.08	820.7	276.22	1084.23	1085.86	1084.23	2.73707e+06	1.14644	1244.87	1243	1	3.13788e+06	368770	2.07181e+06	697300	11.7522	0.117522	66.0257	0.660257
714	Australia	Victoria	Barwon	Greater Geelong City Part A	38769.4	2006	3	218	22.78	186.41	8.81	218	22.78	186.41	8.81	14.67	14.71	14.67	44931.5	14.86	218.59	218	1	667694	69770.9	570940	26983.4	10.4495	0.104495	85.5092	0.855092
715	Australia	Victoria	Barwon	West Barwon	668915	2006	3	3765.6	1211.79	2518.88	34.93	2977	958.02	1991.37	27.61	3470.47	3483.02	3470.46	12989280	1.08504	3779.22	3765.59	0.79058	1.11423e+07	3.58569e+06	7.45332e+06	103339	32.1805	0.321805	66.8919	0.668919
716	Australia	Victoria	Central Highlands	Ballarat City	73994.5	2006	3	1263	885.94	366.29	10.77	1263	885.94	366.29	10.77	582.72	589.03	582.72	2.72413e+06	2.16742	1276.68	1263	1	5.90434e+06	4.14164e+06	1.71235e+06	50348.2	70.1457	0.701457	29.0016	0.290016
717	Australia	Victoria	Central Highlands	East Central Highlands	357970	2006	3	5732.74	1440.04	3973.32	319.38	4692	1178.61	3251.99	261.4	3943.27	3970.15	3943.26	18345088	1.4538	5771.82	5732.73	0.818458	2.18284e+07	5.4832e+06	1.51291e+07	1.2161e+06	25.1196	0.251196	69.3093	0.693093
718	Australia	Victoria	Central Highlands	West Central Highlands	764281	2006	3	1810	371.5	1393.99	44.51	1810	371.5	1393.99	44.51	970.56	982.59	970.55	4151004	1.8649	1832.43	1809.98	1	7.74122e+06	1.58887e+06	5.96198e+06	190366	20.5249	0.205249	77.016	0.77016
719	Australia	Victoria	East Gippsland	East Gippsland Shire	2.09317e+06	2006	3	8800.23	1534.6	7237.67	27.96	6428	1120.93	5286.65	20.42	4946.51	4949.55	4946.5	18714210	1.77908	8805.64	8800.21	0.730437	2.43192e+07	4.24084e+06	2.00011e+07	77255.5	17.4382	0.174382	82.2441	0.822441
720	Australia	Victoria	East Gippsland	Wellington Shire	1.08097e+06	2006	3	56822	10733.5	45331.9	756.55	56822	10733.5	45331.9	756.55	46864.6	46895.7	46864.5	202630192	1.21247	56859.8	56822	1	2.45684e+08	4.64089e+07	1.96004e+08	3.27113e+06	18.8897	0.188897	79.7789	0.797789
721	Australia	Victoria	Gippsland	La Trobe Valley	173312	2006	3	1412	235.65	1174.46	1.89	1412	235.65	1174.46	1.89	1785.98	1786.3	1785.98	4296216	0.790602	1412.25	1412	1	3.3966e+06	566862	2.82519e+06	4546.44	16.6891	0.166891	83.1771	0.831771
722	Australia	Victoria	Gippsland	South Gippsland	433394	2006	3	3699	276.75	3375.36	46.89	3699	276.75	3375.36	46.89	1977.66	1977.76	1977.66	3.48115e+06	1.87039	3699.19	3699	1	6.51111e+06	487145	5.94143e+06	82537.4	7.4818	0.0748175	91.2506	0.912506
723	Australia	Victoria	Gippsland	West Gippsland	486291	2006	3	6508.34	833.82	5323.55	350.97	3993	511.56	3266.11	215.33	4869.16	4872.55	4869.16	14863460	1.33665	6512.87	6508.34	0.61352	1.21889e+07	1.56157e+06	9.97003e+06	657310	12.8116	0.128116	81.7958	0.817958
724	Australia	Victoria	Goulburn	Greater Shepparton City Part A	38988.9	2006	3	13715	203.22	13320.5	191.33	13715	203.22	13320.5	191.33	2842.63	2877.42	2842.62	13378775	4.82476	13882.9	13715	1	6.45493e+07	956450	6.26924e+07	900490	1.4817	0.0148174	97.1232	0.971232
725	Australia	Victoria	Goulburn	North Goulburn	107291	2006	3	21074.1	243.81	19832.4	997.94	19869	229.87	18698.3	940.87	23227.2	23590.2	23227.2	105520816	0.907305	21403.5	21074.1	0.942815	9.02646e+07	1.0443e+06	8.4946e+07	4.27436e+06	1.1569	0.0115692	94.1077	0.941077
726	Australia	Victoria	Goulburn	North Goulburn	154497	2006	3	13031.8	767.48	11628.4	635.92	12150	715.55	10841.6	592.89	13476.8	13686.5	13476.8	73540608	0.96698	13234.6	13031.8	0.932333	6.63003e+07	3.90463e+06	5.91604e+07	3.23529e+06	5.8893	0.0588927	89.231	0.89231
727	Australia	Victoria	Goulburn	North Goulburn	152675	2006	3	9071	1666.53	7161.82	242.65	9071	1666.53	7161.82	242.65	7492.46	7585.08	7444.22	31566312	1.21068	9183.13	9012.6	1	3.82168e+07	7.02122e+06	3.01733e+07	1.0223e+06	18.3721	0.183721	78.9529	0.789529
728	Australia	Victoria	Goulburn	North Goulburn	98469.1	2006	3	45113	4002.09	38725.2	2385.68	45113	4002.09	38725.2	2385.68	46386.2	46975.9	46386.1	240816400	0.972553	45686.5	45113	1	2.34207e+08	2.07771e+07	2.01044e+08	1.23854e+07	8.8713	0.0887126	85.8405	0.858405
729	Australia	Victoria	Goulburn	North Goulburn	251821	2006	3	103244	15360.1	80530.8	7352.74	77462	11524.5	60420.9	5516.64	75851.7	76946.8	75851.6	370623584	1.36113	104734	103244	0.750284	3.78492e+08	5.63104e+07	2.95227e+08	2.69552e+07	14.8776	0.148776	78.0007	0.780007
730	Australia	Victoria	Goulburn	North Goulburn	195017	2006	3	65045.7	6309.13	57555.5	1181.03	48429	4697.39	42852.3	879.32	47849.7	48848.6	47849.6	272662560	1.35938	66403.6	65045.7	0.744539	2.75964e+08	2.67672e+07	2.44186e+08	5010648	9.6995	0.0969954	88.4848	0.884848
731	Australia	Victoria	Goulburn	North Goulburn	95874.6	2006	3	41128.6	2691.63	37851.1	585.8	40820	2671.44	37567.2	581.4	43672.2	43899.6	43672.1	217367744	0.941757	41342.7	41128.5	0.992499	2.03172e+08	1.32965e+07	1.86982e+08	2.89378e+06	6.5444	0.0654443	92.0313	0.920313
732	Australia	Victoria	Goulburn	North Goulburn	3929.12	2006	3	662	0	620.66	41.34	662	0	620.66	41.34	1378.51	1404.89	1378.51	7420070	0.480229	674.67	662	1	3.56333e+06	0	3.34081e+06	222520	0	0	93.7553	0.937553
733	Australia	Victoria	Goulburn	South Goulburn	954675	2006	3	10579.3	1037.91	9124.99	416.43	7890	774.07	6805.36	310.57	5294.03	5335.93	5294.03	18764888	1.99835	10663.1	10579.3	0.745794	2.79664e+07	2.74372e+06	2.41219e+07	1.10083e+06	9.8107	0.0981073	86.253	0.86253
734	Australia	Victoria	Goulburn	South West Goulburn	673850	2006	3	4701	271.59	3997.52	431.89	4701	271.59	3997.52	431.89	2329.61	2337.66	2329.6	9370897	2.01793	4717.24	4700.98	1	1.89099e+07	1.09248e+06	1.60801e+07	1.73729e+06	5.7773	0.0577728	85.0355	0.850355
735	Australia	Victoria	Loddon	Greater Bendigo City Part A	49368.6	2006	3	1217	91.52	850.9	274.58	1217	91.52	850.9	274.58	222.05	223.39	222.05	975197	5.48075	1224.34	1217	1	5.34481e+06	401937	3.73697e+06	1.2059e+06	7.5201	0.0752013	69.9178	0.699178
736	Australia	Victoria	Loddon	North Loddon	1.22622e+06	2006	3	74179	6212.6	67384.2	582.19	74179	6212.6	67384.2	582.19	81246.2	85085.8	81246.2	498317120	0.913015	77684.6	74179	1	4.54971e+08	3.81045e+07	4.13296e+08	3.57082e+06	8.3751	0.0837515	90.84	0.9084
737	Australia	Victoria	Loddon	South Loddon	174740	2006	3	1012.15	430.43	553.86	27.86	806	342.76	441.05	22.19	403.39	405.46	403.39	1.90367e+06	2.50911	1017.34	1012.15	0.796325	3.80365e+06	1.61754e+06	2.08139e+06	104718	42.5263	0.425263	54.7211	0.547211
738	Australia	Victoria	Mallee	East Mallee	373238	2006	3	83628	389.44	82206.4	1032.14	83628	389.44	82206.4	1032.14	101463	105322	101156	755284480	0.824219	86808.8	83374.5	1	6.2252e+08	2.89896e+06	6.11938e+08	7.68317e+06	0.4657	0.00465681	98.3001	0.983001
739	Australia	Victoria	Mallee	East Mallee	83128.8	2006	3	10612.1	115.81	10244.7	251.58	10503	114.62	10139.4	248.99	5011.85	5434.49	5011.85	47555644	2.1174	11507	10612.1	0.989719	9.96592e+07	1087588	9.6209e+07	2.36258e+06	1.0913	0.010913	96.538	0.96538
740	Australia	Victoria	Mallee	East Mallee	2217.03	2006	3	769.79	0	769.79	0	375	0	375	0	844.63	886.89	844.63	7514259	0.911393	808.31	769.79	0.487146	3.33619e+06	0	3.33619e+06	0	0	0	100	1
741	Australia	Victoria	Mallee	East Mallee	526304	2006	3	31426.5	184.52	30625.9	616.16	24136	141.71	23521.1	473.22	19592.4	20796.5	19481.9	164826656	1.60401	33357.8	31249.2	0.772371	2.04203e+08	1.19894e+06	1.99e+08	4.00368e+06	0.5871	0.00587147	97.4522	0.974522
742	Australia	Victoria	Mallee	Mildura Rural City Part A	48329.8	2006	3	13318	37.79	13052.4	227.84	13318	37.79	13052.4	227.84	11403.6	12302.8	11403.6	121722824	1.16788	14368.1	13318	1	1.42157e+08	403373	1.39322e+08	2.43198e+06	0.2838	0.00283751	98.0055	0.980055
743	Australia	Victoria	Mallee	West Mallee	2.96067e+06	2006	3	10380	113.59	10255.5	10.93	10380	113.59	10255.5	10.93	9617.62	10104.7	9617.62	92105184	1.07927	10905.7	10380	1	9.94063e+07	1.08782e+06	9.82138e+07	104673	1.0943	0.0109432	98.8004	0.988004
744	Australia	Victoria	Melbourne	Boroondara City	5996.19	2006	3	0	0	0	0	0	0	0	0	2.6	2.6	2.6	1567.57	0	0	0	1	0	0	0	0	-1	-1	-1	-1
745	Australia	Victoria	Melbourne	Eastern Middle Melbourne	25917	2006	3	472.88	0	443.89	28.99	54	0	50.69	3.31	53.66	53.67	53.66	54768.2	8.81252	472.97	472.88	0.114194	55115.3	0	51736.9	3378.36	0	0	93.8695	0.938695
746	Australia	Victoria	Melbourne	Eastern Outer Melbourne	17521.2	2006	3	61	2.44	58.56	0	61	2.44	58.56	0	41.12	41.12	41.12	51243.6	1.48346	61	61	1	76018	3040.72	72977.2	0	4	0.04	96	0.96
747	Australia	Victoria	Melbourne	Frankston City	12951.6	2006	3	181.85	32.42	117	32.43	145	25.85	93.29	25.86	124.12	124.51	124.12	393055	1.46511	182.42	181.85	0.79736	459177	81860.1	295425	81891.8	17.8279	0.178279	64.3387	0.643387
748	Australia	Victoria	Melbourne	Greater Dandenong City	12952.2	2006	3	214.06	16.47	191.2	6.39	160	12.31	142.91	4.78	241.07	241.1	241.07	554847	0.887958	214.09	214.06	0.747454	368256	28332.7	328922	11001.7	7.6941	0.076941	89.3208	0.893208
749	Australia	Victoria	Melbourne	Hume City	50360.4	2006	3	783.62	74.59	535.93	173.1	222	21.13	151.83	49.04	74.48	74.57	74.48	51051.4	10.521	784.55	783.6	0.283301	152167	14483.3	104070	33613.9	9.5186	0.0951864	68.3916	0.683916
750	Australia	Victoria	Melbourne	Inner Melbourne	8591.92	2006	3	0	0	0	0	0	0	0	0	1.57	1.57	1.57	349.32	0	0	0	1	0	0	0	0	-1	-1	-1	-1
751	Australia	Victoria	Melbourne	Melton-Wyndham	106905	2006	3	3860.22	882.78	2293.52	683.92	2740	626.6	1627.95	485.45	6611.73	6615.04	6611.73	31734042	0.583844	3862.15	3860.22	0.709804	1.31511e+07	3.00747e+06	7.8136e+06	2.32999e+06	22.8686	0.228686	59.4142	0.594142
752	Australia	Victoria	Melbourne	Moreland City	5094.45	2006	3	0	0	0	0	0	0	0	0	1.15	1.15	1.15	582.53	0	0	0	1	0	0	0	0	-1	-1	-1	-1
753	Australia	Victoria	Melbourne	Mornington Peninsula Shire	72328.4	2006	3	11709.9	5058.62	5480.85	1170.46	2068	893.36	967.93	206.71	1945.63	1948.46	1945.63	5935939	6.01858	11727	11709.9	0.176602	6.30928e+06	2.72556e+06	2.95307e+06	630653	43.1994	0.431994	46.8051	0.468051
754	Australia	Victoria	Melbourne	Northern Middle Melbourne	11593.1	2006	3	7	0	7	0	1	0	1	0	0	0	0	0	1	0	0	1	675.9	0	675.9	0	0	0	100	1
755	Australia	Victoria	Melbourne	Northern Outer Melbourne	92280.9	2006	3	614	10.27	597.7	6.03	614	10.27	597.7	6.03	282.22	282.41	282.22	643609	2.17561	614.41	614	1	1.40024e+06	23421	1.36307e+06	13751.5	1.6726	0.0167264	97.3453	0.973453
756	Australia	Victoria	Melbourne	South Eastern Outer Melbourne	169040	2006	3	14520.6	2420.32	9983.67	2116.66	6457	1076.26	4439.51	941.23	5259.22	5264.6	5259.22	18671878	2.76099	14535.5	14520.6	0.444677	2.29244e+07	3.82106e+06	1.57617e+07	3.34166e+06	16.6681	0.166681	68.755	0.68755
757	Australia	Victoria	Melbourne	Southern Melbourne	18300.6	2006	3	1295.34	795.21	410.09	90.04	82	50.34	25.96	5.7	92.63	92.63	92.63	49718.4	13.984	1295.34	1295.34	0.0633038	44012.8	27019.6	13933.8	3059.43	61.3901	0.613901	31.6589	0.316589
758	Australia	Victoria	Melbourne	Western Melbourne	26299.8	2006	3	864.57	0	864.57	0	106	0	106	0	57.79	57.79	57.79	244897	14.961	864.6	864.6	0.122604	449197	0	449197	0	0	0	100	1
759	Australia	Victoria	Melbourne	Yarra Ranges Shire Part A	133241	2006	3	8516.82	567.46	7640.89	308.47	5055	336.8	4535.11	183.09	3297.21	3300.23	3297.21	10958807	2.58304	8524.62	8516.82	0.593531	1.68011e+07	1.11941e+06	1.50732e+07	608529	6.6628	0.0666282	89.7153	0.897153
760	Australia	Victoria	Ovens-Murray	East Ovens-Murray	1.09223e+06	2006	3	6098.32	413.34	5681.03	3.95	5416	367.09	5045.4	3.51	4084.99	4092.43	4084.99	10018340	1.49286	6109.43	6098.32	0.888113	1.32826e+07	900279	1.23737e+07	8608.19	6.7779	0.0677793	93.1573	0.931573
761	Australia	Victoria	Ovens-Murray	West Ovens-Murray	416611	2006	3	7964	1939.62	5952.8	71.58	7964	1939.62	5952.8	71.58	5480.76	5515.55	5480.76	14613323	1.45308	8014.55	7964	1	2.12344e+07	5.1716e+06	1.58719e+07	190853	24.3548	0.243548	74.7464	0.747464
762	Australia	Victoria	Ovens-Murray	Wodonga	253186	2006	3	4548.71	296.01	4173.76	78.94	2634	171.41	2416.88	45.71	3340.3	3348.57	3340.29	9161149	1.36177	4559.97	4548.7	0.579067	7.22406e+06	470112	6.62858e+06	125365	6.5076	0.0650756	91.757	0.91757
763	Australia	Victoria	Western District	Glenelg	1.28618e+06	2006	3	7736.37	3871.98	3800.13	64.26	6003	3004.45	2948.69	49.86	2575.5	2577.48	2575.46	9855273	3.00383	7742.32	7736.25	0.775957	2.29711e+07	1.14968e+07	1.12835e+07	190795	50.0491	0.500491	49.1203	0.491203
764	Australia	Victoria	Western District	Hopkins	988323	2006	3	12493.2	6729.88	5304.14	459.21	11195	6030.55	4752.96	411.49	5946.54	5959.07	5946.52	26236714	2.10092	12519.5	12493.2	0.896088	4.93936e+07	2.66075e+07	2.09706e+07	1.81554e+06	53.8682	0.538682	42.4561	0.424561
765	Australia	Victoria	Western District	Warrnambool City	12071.9	2006	3	976.32	579.43	395.27	1.62	613	363.8	248.18	1.02	246.9	246.93	246.9	606064	3.95431	976.44	976.32	0.627868	1.50473e+06	893018	609206	2503.79	59.3484	0.593484	40.4857	0.404857
766	Australia	Victoria	Wimmera	North Wimmera	1.48606e+06	2006	3	962	127.03	818.25	16.72	962	127.03	818.25	16.72	544.46	588.59	544.45	2.56861e+06	1.76689	1039.97	961.98	1	4.53844e+06	599291	3.86027e+06	78880.2	13.2048	0.132048	85.0572	0.850572
767	Australia	Victoria	Wimmera	South Wimmera	1.90837e+06	2006	3	10245	6851.36	3175.78	217.86	10245	6851.36	3175.78	217.86	5304.01	5523.9	5304	28048222	1.93156	10669.7	10245	1	54176752	3.62308e+07	1.67939e+07	1.15207e+06	66.8752	0.668752	30.9983	0.309983
768	Australia	Western Australia	Central	Carnegie	4.16258e+07	2006	3	30	5.9	24.1	0	30	5.9	24.1	0	16.21	16.2	16.2	232047	1.85071	29.98	29.98	1.00067	429738	84515.2	345223	0	19.6667	0.196667	80.3333	0.803333
769	Australia	Western Australia	Central	Gascoyne	1.35278e+07	2006	3	1627	1079.82	532.64	14.54	1627	1079.82	532.64	14.54	737.77	737.77	737.77	12987404	2.20529	1627	1627	1	2.8641e+07	1.90087e+07	9.37638e+06	255956	66.3688	0.663688	32.7376	0.327376
770	Australia	Western Australia	Central	Geraldton	18958	2006	3	47	23.81	22.28	0.91	47	23.81	22.28	0.91	14.2	16.57	14.2	177228	3.30986	54.84	47	1	586601	297170	278074	11357.6	50.6596	0.506596	47.4043	0.474043
771	Australia	Western Australia	Central	Greenough River	5.2268e+06	2006	3	4033	1912.85	2118.44	1.71	4033	1912.85	2118.44	1.71	180.78	223.56	180.75	1.8169e+06	22.309	4987.4	4032.35	1	4.05331e+07	1.92248e+07	2.12911e+07	17186.1	47.43	0.4743	52.5276	0.525276
772	Australia	Western Australia	Kimberley	Fitzroy	1.75012e+07	2006	3	428	211.88	211.53	4.59	428	211.88	211.53	4.59	124.42	124.4	124.4	1.84921e+06	3.43996	427.93	427.93	1.00016	6.36224e+06	3.14961e+06	3.1444e+06	68230.6	49.5047	0.495047	49.4229	0.494229
773	Australia	Western Australia	Kimberley	Ord	2.45769e+07	2006	3	9612	256.67	9325.14	30.19	9612	256.67	9325.14	30.19	7498.75	7498.75	7498.75	66810956	1.28181	9612	9612	1	8.56392e+07	2.28683e+06	83083383	268981	2.6703	0.0267031	97.0156	0.970156
774	Australia	Western Australia	Lower Great Southern	King	1.43266e+06	2006	3	3718	255.96	3391.28	70.76	3718	255.96	3391.28	70.76	832.62	994.85	832.58	4.14284e+06	4.46542	4442.43	3717.82	1	1.84995e+07	1.27357e+06	1.68739e+07	352078	6.8843	0.0688435	91.2125	0.912125
775	Australia	Western Australia	Lower Great Southern	Pallinup	2.45974e+06	2006	3	1019	69.79	932.25	16.96	1019	69.79	932.25	16.96	20.08	22.5	20.07	40153.5	50.747	1141.81	1018.49	1	2.03767e+06	139557	1.8642e+06	33914.5	6.8489	0.0684887	91.4868	0.914868
776	Australia	Western Australia	Midlands	Avon	3.13525e+06	2006	3	863	305.68	556.28	1.04	863	305.68	556.28	1.04	35.42	49.89	35.41	236079	24.365	1215.57	862.76	1	5.75202e+06	2.0374e+06	3.70768e+06	6931.74	35.4206	0.354206	64.4589	0.644589
777	Australia	Western Australia	Midlands	Campion	6.17315e+06	2006	3	473	17.19	444.57	11.24	473	17.19	444.57	11.24	0	0	0	0	1	0	0	1	3.55669e+06	129259	3.34291e+06	84518.4	3.6342	0.0363425	93.9894	0.939894
778	Australia	Western Australia	Midlands	Moore	1.74699e+06	2006	3	5397	3980.81	1414.2	1.99	5397	3980.81	1414.2	1.99	2150.02	2938.96	2149.92	17458110	2.51021	7377.4	5396.75	1	4.38235e+07	3.23241e+07	1.14833e+07	16158.8	73.7597	0.737597	26.2034	0.262034
779	Australia	Western Australia	Perth	Central Metropolitan	8660.53	2006	3	0	0	0	0	0	0	0	0	0.13	0.13	0.13	1150.27	0	0	0	1	0	0	0	0	-1	-1	-1	-1
780	Australia	Western Australia	Perth	East Metropolitan	205546	2006	3	3617.33	2981.31	629.5	6.52	1822	1501.64	317.07	3.29	1557.56	1558.1	1557.56	13681703	2.32243	3618.58	3617.33	0.503686	1.60046e+07	1.31905e+07	2.78516e+06	28899.6	82.4174	0.824174	17.4023	0.174023
781	Australia	Western Australia	Perth	North Metropolitan	88945.4	2006	3	8077.87	7958.99	83.43	35.45	1583	1559.7	16.35	6.95	1002.16	1004.35	1002.15	8644788	8.06046	8095.52	8077.79	0.195969	1.36553e+07	1.34543e+07	141039	59952.4	98.5283	0.985283	1.0328	0.0103282
782	Australia	Western Australia	Perth	South East Metropolitan	173523	2006	3	6789.3	3771.06	2988.66	29.58	1295	719.3	570.06	5.64	866.1	868.2	866.09	6433844	7.83893	6805.76	6789.22	0.190744	9.62005e+06	5.3434e+06	4.23475e+06	41897.4	55.5442	0.555442	44.0201	0.440201
783	Australia	Western Australia	Perth	South West Metropolitan	61933	2006	3	3001.03	2715.62	275.71	9.7	791	715.77	72.67	2.56	852.32	852.7	852.31	7.05633e+06	3.52101	3002.37	3000.99	0.26358	6.54875e+06	5.92591e+06	601640	21194.4	90.4896	0.904896	9.1872	0.0918718
784	Australia	Western Australia	Pilbara	De Grey	3.90085e+07	2006	3	0	0	0	0	0	0	0	0	0.13	0.13	0.13	2221.35	0	0	0	1	0	0	0	0	-1	-1	-1	-1
785	Australia	Western Australia	Pilbara	Fortescue	1.16487e+07	2006	3	0	0	0	0	0	0	0	0	12.34	12.34	12.34	214792	0	0	0	1	0	0	0	0	-1	-1	-1	-1
786	Australia	Western Australia	South Eastern	Johnston	1.49295e+07	2006	3	50	1.82	47.35	0.83	50	1.82	47.35	0.83	6.93	6.86	6.83	51882.9	7.21501	49.49	49.28	1.01031	378193	13766.2	358149	6278	3.64	0.0364	94.7	0.947
787	Australia	Western Australia	South Eastern	Kalgoorlie/Boulder City Part A	10305.3	2006	3	0	0	0	0	0	0	0	0	0	0	0	0	1	0	0	1	0	0	0	0	-1	-1	-1	-1
788	Australia	Western Australia	South Eastern	Lefroy	6.22911e+07	2006	3	0	0	0	0	0	0	0	0	0	0	0	0	1	0	0	1	0	0	0	0	-1	-1	-1	-1
789	Australia	Western Australia	South West	Blackwood	1.4129e+06	2006	3	5848	1367.52	4446.41	34.07	5848	1367.52	4446.41	34.07	5006.05	5040.06	5005.88	28595204	1.16819	5887.73	5847.8	1	3.34045e+07	7.81145e+06	2.53985e+07	194612	23.3844	0.233844	76.033	0.76033
790	Australia	Western Australia	South West	Bunbury	13823.1	2006	3	854.81	338.98	515.83	0	16	6.34	9.66	0	991.81	991.81	991.81	8.23955e+06	0.861869	854.81	854.81	0.0187176	132921	52670.1	80251.3	0	39.6556	0.396556	60.3444	0.603444
791	Australia	Western Australia	South West	Mandurah	188465	2006	3	606	149.13	445.04	11.83	606	149.13	445.04	11.83	372.55	372.89	372.55	2.63161e+06	1.62663	606.55	606	1	4.28065e+06	1.05342e+06	3.14366e+06	83564.5	24.6089	0.246089	73.4389	0.734389
792	Australia	Western Australia	South West	Preston	874337	2006	3	13530.2	2101.69	11239.4	189.13	12931	2008.61	10741.6	180.75	12970.6	13058.1	12970	86781232	1.04314	13621.5	13529.6	0.955756	8.652e+07	1.34394e+07	7.18712e+07	1.20938e+06	15.5333	0.155333	83.0689	0.830689
793	Australia	Western Australia	South West	Vasse	369750	2006	3	7493	3978.95	3497.64	16.41	7493	3978.95	3497.64	16.41	2692.94	2739.91	2692.79	11683484	2.78246	7623.69	7492.58	1	3.25088e+07	1.72629e+07	1.51747e+07	71195.8	53.1022	0.531022	46.6788	0.466788
794	Australia	Western Australia	Upper Great Southern	Hotham	1.9295e+06	2006	3	666	38.99	619.93	7.08	666	38.99	619.93	7.08	86.88	100.95	86.86	603722	7.66575	773.86	665.85	1	4.62798e+06	270938	4.30784e+06	49198.3	5.8544	0.0585435	93.0826	0.930826
795	Australia	Western Australia	Upper Great Southern	Lakes	2.51539e+06	2006	3	200	12.71	186.26	1.03	200	12.71	186.26	1.03	3.64	4.57	3.64	13987.9	54.945	251.1	200	1	768564	48842.3	715764	3958.11	6.355	0.06355	93.13	0.9313
796	Austria	Ostösterreich			2.35212e+06	2003	2	85480	72191.4	13288.6	0	32980	27853	5127.01	0	90460	38404.3	32224.7	33687032	0.944948	36290.1	30450.7	1	3.18325e+07	2.68839e+07	4.94862e+06	0	84.4542	0.844542	15.5458	0.155458
797	Austria	Südösterreich			2.58992e+06	2003	2	2330	1082.96	1247.04	0	760	353.24	406.76	0	2770	1266.75	933.96	444911	0.841155	1065.53	785.61	0.967401	362040	168272	193767	0	46.479	0.46479	53.521	0.53521
798	Austria	Westösterreich			3.43554e+06	2003	2	2610	1462.75	1147.25	0	490	274.62	215.38	0	4250	896.1	763.59	59219.7	0.614118	550.31	468.93	1	36367.8	20382.3	15985.5	0	56.0441	0.560441	43.9559	0.439559
799	Azerbaijan				8.61784e+06	1995	1	1426000	96700	1329300	0	1100000	74593.3	1.02541e+06	0	1453318	739208	734647	3852317440	0.981203	725314	720837	1.51659	5732549298	3.88736e+08	5.34381e+09	0	6.7812	0.0678121	93.2188	0.932188
800	Bahamas				1.28411e+06	-9	9	0	0	0	0	0	0	0	0	0	0	0	0	1	0	0	1	0	0	0	0	-1	-1	-1	-1
801	Bahrain				62324.6	2000	1	4015	3626	0	389	4015	3626	0	389	4060	3094.48	3094.48	38959616	0.988916	3060.18	3060.18	1.31201	5.0549e+07	4.56515e+07	0	4.89753e+06	90.3113	0.903113	0	0
802	Bangladesh	Bandarban			435013	2005	2	2830	0	2830	0	2830	0	2830	0	4066.66	5116.97	2897.21	13039625	0.695903	3560.91	2016.18	1	9.07431e+06	0	9.07431e+06	0	0	0	100	1
803	Bangladesh	Barisal			562814	2005	2	99150	392.01	98758	0	99150	392.01	98758	0	58540.2	99915.8	55947.4	259298992	1.69371	169228	94758.6	1	4.39177e+08	1.73638e+06	4.37441e+08	0	0.3954	0.00395371	99.6046	0.996046
804	Bangladesh	Bogra			387401	2005	2	323340	318656	4684.13	0	323340	318656	4684.13	0	290221	437451	267971	1361380352	1.11412	487372	298552	1	1.51674e+09	1.49477e+09	2.19725e+07	0	98.5513	0.985513	1.4487	0.0144867
805	Bangladesh	Chittagong			702577	2005	2	145680	21040	124640	0	145680	21040	124640	0	142150	217637	121596	560845056	1.02483	223042	124616	1	5.74773e+08	8.30123e+07	4.91761e+08	0	14.4426	0.144426	85.5574	0.855574
806	Bangladesh	Comilla			636831	2005	2	302700	158790	143910	0	302700	158790	143910	0	270433	483563	262921	1214094720	1.11932	541259	294292	1	1.35895e+09	7.1288e+08	6.46074e+08	0	52.458	0.52458	47.542	0.47542
807	Bangladesh	Dhaka			696489	2005	2	254540	181267	73272.7	0	254540	181267	73272.7	0	207407	365904	201666	992709248	1.22725	449056	247495	1	1.2183e+09	8.67598e+08	3.50704e+08	0	71.2137	0.712137	28.7863	0.287863
808	Bangladesh	Dinajpur			666076	2005	2	353290	340829	12460.9	0	353290	340829	12460.9	0	232878	408611	229791	1336269952	1.51706	619889	348607	1	2.02721e+09	1.9557e+09	7.15018e+07	0	96.4729	0.964729	3.5271	0.0352711
809	Bangladesh	Faridpur			614095	2005	2	198700	108181	90519.1	0	198700	108181	90519.1	0	147095	264375	145158	721801792	1.35083	357126	196084	1	9.75033e+08	5.3085e+08	4.44183e+08	0	54.4443	0.544443	45.5557	0.455557
810	Bangladesh	Jamalpur			335903	2005	2	186970	170992	15977.9	0	186970	170992	15977.9	0	145137	261470	143204	742030528	1.28823	336834	184480	1	9.55909e+08	8.7422e+08	8.1689e+07	0	91.4543	0.914543	8.5457	0.0854569
811	Bangladesh	Jessore			645167	2005	2	331840	312533	19307.4	0	331840	312533	19307.4	0	243197	434926	239902	1289028992	1.36449	593452	327345	1	1.75887e+09	1.65653e+09	1.02336e+08	0	94.1817	0.941817	5.8183	0.0581829
812	Bangladesh	Khagrachhari			293940	2005	2	8500	0	8500	0	8500	0	8500	0	6307.73	8001.88	4548.05	20474736	1.34755	10783	6128.74	1	2.75908e+07	0	2.75908e+07	0	0	0	100	1
813	Bangladesh	Khulna			1.14188e+06	2005	2	120600	77841.8	42758.2	0	120600	77841.8	42758.2	0	77627.1	135977	77094.7	389598272	1.55358	211252	119773	1	6.05272e+08	3.90676e+08	2.14597e+08	0	64.5455	0.645455	35.4545	0.354545
814	Bangladesh	Kishoreganj			526858	2005	2	270330	160599	109731	0	270330	160599	109731	0	239701	391734	217859	1002315904	1.12778	441790	245697	1	1.13039e+09	6.71547e+08	4.58844e+08	0	59.4084	0.594084	40.5916	0.405916
815	Bangladesh	Kushtia			341763	2005	2	183320	156902	26418.3	0	183320	156902	26418.3	0	175021	313537	172566	1023685184	1.04742	328404	180749	1	1.07223e+09	917707627	1.54519e+08	0	85.5889	0.855889	14.4111	0.144111
816	Bangladesh	Mymensingh			455291	2005	2	196270	176999	19270.9	0	196270	176999	19270.9	0	137040	252289	137040	680400448	1.43221	361332	196270	1	9.74478e+08	8.78798e+08	9.568e+07	0	90.1814	0.901814	9.8186	0.0981859
817	Bangladesh	Noakhali			398099	2005	2	87820	11740	76080	0	87820	11740	76080	0	71416.9	127119	70219.1	315974560	1.22968	156316	86347	1	3.88548e+08	5.1942e+07	3.36606e+08	0	13.3683	0.133683	86.6317	0.866317
818	Bangladesh	Pabna			472436	2005	2	185750	171078	14672.1	0	185750	171078	14672.1	0	163481	279772	159373	839866304	1.13622	317882	181083	1	9.54271e+08	8.78894e+08	7.53766e+07	0	92.1011	0.921011	7.8989	0.0789887
819	Bangladesh	Patuakhali			357324	2005	2	12550	0	12550	0	12550	0	12550	0	8449.46	15336.1	8449.46	40986796	1.4853	22778.7	12550	1	6.08778e+07	0	6.08778e+07	0	0	0	100	1
820	Bangladesh	Rajshahi			944294	2005	2	499780	445067	54712.6	0	499780	445067	54712.6	0	380915	642148	368743	2190243328	1.31205	842531	483809	1	2.87371e+09	2.55912e+09	3.14595e+08	0	89.0527	0.890527	10.9473	0.109473
821	Bangladesh	Rangamati			544161	2005	2	7280	0	7280	0	7280	0	7280	0	8146.83	12909.7	7360.91	32306644	0.893599	11536.1	6577.7	1	2.88692e+07	0	2.88692e+07	0	0	0	100	1
822	Bangladesh	Rangpur			969838	2005	2	488040	454982	33057.9	0	488040	454982	33057.9	0	381381	667852	377272	2057284480	1.27967	854627	482782	1	2.63264e+09	2.45431e+09	1.78325e+08	0	93.2264	0.932264	6.7736	0.0677361
823	Bangladesh	Sylhet			1.1965e+06	2005	2	275590	34594.5	240996	0	275590	34594.5	240996	0	232338	408870	224916	986763968	1.18616	484985	266786	1	1.17046e+09	1.46926e+08	1.02353e+09	0	12.5529	0.125529	87.4471	0.874471
824	Bangladesh	Tangail			354179	2005	2	160650	156109	4541.04	0	160650	156109	4541.04	0	129161	235755	128302	669596096	1.24379	293231	159581	1	8.3284e+08	8.09299e+08	2.35416e+07	0	97.1733	0.971733	2.8267	0.0282667
825	Barbados				44963.9	1989	4	1000	900	100	0	1000	900	100	0	1000	1000	1000	1.69186e+06	1	1000	1000	1	1.69186e+06	1.52267e+06	169186	0	90	0.9	10	0.1
826	Belarus				2.06727e+07	1993	4	115000	17250	97750	0	25900	3885	22015	0	115906	115765	114951	153343600	0.992181	114860	114053	0.227088	3.45502e+07	5.18253e+06	2.93677e+07	0	15	0.15	85	0.85
827	Belgium	Brussel; Vlaanderen; Gewest			1.3714e+06	2003	2	19020	10835.6	8184.36	0	1680	957.09	722.91	0	32030	8599.62	5506.79	4.02196e+06	0.593818	5106.61	3270.03	0.513757	1.22701e+06	699025	527988	0	56.9697	0.569697	43.0303	0.430303
828	Belgium	Wallonne			1.68452e+06	2003	2	2790	1931.54	858.46	0	170	117.69	52.31	0	3140	977.75	699.92	1.01944e+06	0.888535	868.77	621.9	0.273356	247608	171417	76190.4	0	69.2308	0.692308	30.7692	0.307692
829	Belize	BELIZE			278296	2005	2	95.2	14.2	81	0	95.2	14.2	81	0	1000	113.41	108.52	270288	0.0952	10.8	10.33	8.81481	226818	33832.1	192986	0	14.916	0.14916	85.084	0.85084
830	Belize	CAYO			567265	2005	2	17	14.2	2.8	0	17	14.2	2.8	0	88.66	96.65	64.19	48779.6	0.191744	18.53	12.31	1	9353.18	7812.66	1540.52	0	83.5294	0.835294	16.4706	0.164706
831	Belize	COROZAL			172912	2005	2	736.4	736.4	0	0	736.4	736.4	0	0	499.55	388.38	303.37	590582	1.47413	572.52	447.21	1.28624	1.11979e+06	1.11979e+06	0	0	100	1	0	0
832	Belize	ORANGE WALK			471690	2005	2	1443	25.5	1417.5	0	1443	25.5	1417.5	0	1411.8	1237.01	927.31	1.54757e+06	1.0221	1264.35	947.8	1.1413	1.80527e+06	31901.9	1.77337e+06	0	1.7672	0.0176715	98.2328	0.982328
833	Belize	STANN CREEK			226874	2005	2	1217	2	1215	0	1217	2	1215	0	0	0	0	0	1	0	0	1	2.73286e+06	4491.15	2.72837e+06	0	0.1643	0.00164339	99.8357	0.998357
834	Belize	TOLEDO			512042	2005	2	39.7	0	39.7	0	39.7	0	39.7	0	0	0	0	0	1	0	0	1	82832.2	0	82832.2	0	0	0	100	1
835	Benin				1.15999e+07	2002	1	12258	2190	10068	0	7131	1274.02	5856.98	0	12258	2728.74	2426.8	12843580	1	2728.74	2426.8	2.61329	3.35641e+07	5.99653e+06	2.75675e+07	0	17.8659	0.178659	82.1341	0.821341
836	Bhutan				3.97794e+06	1995	1	38734	0	38734	0	36584	0	36584	0	42777.9	47083.3	41399.3	65075424	0.905467	42632.3	37485.7	0.975946	5.75063e+07	0	5.75063e+07	0	0	0	100	1
837	Bolivia (Plurinational State of)				1.08777e+08	1999	1	128240	8977	119263	0	128240	8977	119263	0	128240	126834	126833	415555264	1	126834	126833	1.01108	4.20161e+08	2.9412e+07	3.90749e+08	0	7.0002	0.0700016	92.9998	0.929998
838	Bosnia and Herzegovina				5.11952e+06	2000	1	4630	1389	3241	0	4630	1389	3241	0	4630	2455.75	2455.75	9821956	1	2455.75	2455.75	1.88537	1.8518e+07	5.55541e+06	1.29626e+07	0	30	0.3	70	0.7
839	Botswana				5.79579e+07	1992	1	1439	663.36	775.64	0	621	286.27	334.73	0	1438.6	332.75	332.75	2.25135e+06	1.00028	332.84	332.84	1.86576	4.20164e+06	1.93688e+06	2.26476e+06	0	46.0987	0.460987	53.9013	0.539013
840	Brazil	Acre	Brasileira	ASSIS BRASIL	291557	1996	4	0	0	0	0	0	0	0	0	0	0	0	0	1	0	0	1	0	0	0	0	-1	-1	-1	-1
841	Brazil	Acre	Brasileira	BRASILEIA	438825	1996	4	0.65	0	0.65	0	0.65	0	0.65	0	0.65	0.3	0.3	553.3	1	0.3	0.3	2.16667	1198.82	0	1198.82	0	0	0	100	1
842	Brazil	Acre	Brasileira	EPITACIOLANDIA	161010	1996	4	0	0	0	0	0	0	0	0	0	0	0	0	1	0	0	1	0	0	0	0	-1	-1	-1	-1
843	Brazil	Acre	Brasileira	XAPURI	472690	1996	4	606.96	0	606.96	0	606.96	0	606.96	0	606.96	94	94	162329	1	94	94	6.45702	1.04816e+06	0	1.04816e+06	0	0	0	100	1
844	Brazil	Acre	Cruzeiro Do Sul	CRUZEIRO DO SUL	788625	1996	4	7.47	0	7.47	0	7.47	0	7.47	0	7.47	3.32	3.32	2298.06	1	3.32	3.32	2.25	5170.64	0	5170.64	0	0	0	100	1
845	Brazil	Acre	Cruzeiro Do Sul	MANCIO LIMA	465605	1996	4	0	0	0	0	0	0	0	0	0	0	0	0	1	0	0	1	0	0	0	0	-1	-1	-1	-1
846	Brazil	Acre	Cruzeiro Do Sul	MARECHAL THAUMATURGO	770676	1996	4	0	0	0	0	0	0	0	0	0	0	0	0	1	0	0	1	0	0	0	0	-1	-1	-1	-1
847	Brazil	Acre	Cruzeiro Do Sul	PORTO WALTER	610790	1996	4	0	0	0	0	0	0	0	0	0	0	0	0	1	0	0	1	0	0	0	0	-1	-1	-1	-1
848	Brazil	Acre	Cruzeiro Do Sul	RODRIGUES ALVES	334324	1996	4	0	0	0	0	0	0	0	0	0	0	0	0	1	0	0	1	0	0	0	0	-1	-1	-1	-1
849	Brazil	Acre	Rio Branco	ACRELANDIA	159142	1996	4	0	0	0	0	0	0	0	0	0	0	0	0	1	0	0	1	0	0	0	0	-1	-1	-1	-1
850	Brazil	Acre	Rio Branco	BUJARI	339765	1996	4	0	0	0	0	0	0	0	0	0	0	0	0	1	0	0	1	0	0	0	0	-1	-1	-1	-1
851	Brazil	Acre	Rio Branco	CAPIXABA	175210	1996	4	0	0	0	0	0	0	0	0	0	0	0	0	1	0	0	1	0	0	0	0	-1	-1	-1	-1
852	Brazil	Acre	Rio Branco	PLACIDO DE CASTRO	199930	1996	4	0	0	0	0	0	0	0	0	0	0	0	0	1	0	0	1	0	0	0	0	-1	-1	-1	-1
853	Brazil	Acre	Rio Branco	PORTO ACRE	292283	1996	4	0	0	0	0	0	0	0	0	0	0	0	0	1	0	0	1	0	0	0	0	-1	-1	-1	-1
854	Brazil	Acre	Rio Branco	RIO BRANCO	996496	1996	4	41.58	11.32	30.26	0	41.58	11.32	30.26	0	41.58	19.32	19.32	27910.6	1	19.32	19.32	2.15217	60068.4	16353.4	43715	0	27.2246	0.272246	72.7754	0.727754
855	Brazil	Acre	Rio Branco	SENADOR GUIOMARD	180685	1996	4	23.34	9.9	13.44	0	23.34	9.9	13.44	0	23.34	10.79	10.79	16173.2	1	10.79	10.79	2.16311	34984.6	14839.2	20145.3	0	42.4165	0.424165	57.5835	0.575835
856	Brazil	Acre	Sena Madureira	MANOEL URBANO	948565	1996	4	0	0	0	0	0	0	0	0	0	0	0	0	1	0	0	1	0	0	0	0	-1	-1	-1	-1
857	Brazil	Acre	Sena Madureira	SANTA ROSA DO PURUS	611669	1996	4	0	0	0	0	0	0	0	0	0	0	0	0	1	0	0	1	0	0	0	0	-1	-1	-1	-1
858	Brazil	Acre	Sena Madureira	SENA MADUREIRA	2.52892e+06	1996	4	0	0	0	0	0	0	0	0	0	0	0	0	1	0	0	1	0	0	0	0	-1	-1	-1	-1
859	Brazil	Acre	Tarauaca	FEIJO	2.27494e+06	1996	4	0	0	0	0	0	0	0	0	0	0	0	0	1	0	0	1	0	0	0	0	-1	-1	-1	-1
860	Brazil	Acre	Tarauaca	JORDAO	672087	1996	4	0	0	0	0	0	0	0	0	0	0	0	0	1	0	0	1	0	0	0	0	-1	-1	-1	-1
861	Brazil	Acre	Tarauaca	TARAUACA	1.61291e+06	1996	4	0	0	0	0	0	0	0	0	0	0	0	0	1	0	0	1	0	0	0	0	-1	-1	-1	-1
862	Brazil	Alagoas	Alagoana do Sertao do Sao Francisco	DELMIRO GOUVEIA	60803.8	1996	4	13.6	13.6	0	0	13.6	13.6	0	0	13.6	13.59	13.59	121527	1	13.59	13.59	1.00074	121616	121616	0	0	100	1	0	0
863	Brazil	Alagoas	Alagoana do Sertao do Sao Francisco	OLHO D'AGUA DO CASADO	32381.1	1996	4	0	0	0	0	0	0	0	0	0	0	0	0	1	0	0	1	0	0	0	0	-1	-1	-1	-1
864	Brazil	Alagoas	Alagoana do Sertao do Sao Francisco	PIRANHAS	40840.6	1996	4	3.15	0	3.15	0	3.15	0	3.15	0	3.15	3.15	3.15	20661.6	1	3.15	3.15	1	20661.6	0	20661.6	0	0	0	100	1
865	Brazil	Alagoas	Arapiraca	ARAPIRACA	36768.8	1996	4	44.65	44.65	0	0	44.65	44.65	0	0	44.65	44.65	44.65	196369	1	44.65	44.65	1	196369	196369	0	0	100	1	0	0
866	Brazil	Alagoas	Arapiraca	CAMPO GRANDE	16799.5	1996	4	0	0	0	0	0	0	0	0	0	0	0	0	1	0	0	1	0	0	0	0	-1	-1	-1	-1
867	Brazil	Alagoas	Arapiraca	COITE DO NOIA	8819.23	1996	4	3.24	0	3.24	0	3.24	0	3.24	0	3.24	3.24	3.24	13219.6	1	3.24	3.24	1	13219.6	0	13219.6	0	0	0	100	1
868	Brazil	Alagoas	Arapiraca	CRAIBAS	27722.8	1996	4	0	0	0	0	0	0	0	0	0	0	0	0	1	0	0	1	0	0	0	0	-1	-1	-1	-1
869	Brazil	Alagoas	Arapiraca	FEIRA GRANDE	15617.2	1996	4	17.95	9.69	8.26	0	17.95	9.69	8.26	0	17.95	17.95	17.95	72142.2	1	17.95	17.95	1	72142.2	38944.7	33197.5	0	53.9833	0.539833	46.0167	0.460167
870	Brazil	Alagoas	Arapiraca	GIRAU DO PONCIANO	50393.7	1996	4	0	0	0	0	0	0	0	0	0	0	0	0	1	0	0	1	0	0	0	0	-1	-1	-1	-1
871	Brazil	Alagoas	Arapiraca	LAGOA DA CANOA	10178	1996	4	2.7	2	0.7	0	2.7	2	0.7	0	2.7	2.7	2.7	11250	1	2.7	2.7	1	11250	8333.32	2916.66	0	74.0741	0.740741	25.9259	0.259259
872	Brazil	Alagoas	Arapiraca	LIMOEIRO DE ANADIA	33268.3	1996	4	261.34	118.79	142.55	0	261.34	118.79	142.55	0	261.34	261.34	261.34	1.31004e+06	1	261.34	261.34	1	1.31004e+06	595470	714574	0	45.4542	0.454542	54.5458	0.545458
873	Brazil	Alagoas	Arapiraca	SAO SEBASTIAO	30829	1996	4	113.29	43.47	69.82	0	113.29	43.47	69.82	0	113.29	113.29	113.29	481164	1	113.29	113.29	1	481164	184625	296539	0	38.3706	0.383706	61.6294	0.616294
874	Brazil	Alagoas	Arapiraca	TAQUARANA	16898.6	1996	4	802.84	261.8	541.04	0	802.84	261.8	541.04	0	802.84	802.84	802.84	3.44494e+06	1	802.84	802.84	1	3.44494e+06	1.12337e+06	2.32157e+06	0	32.6092	0.326092	67.3908	0.673908
875	Brazil	Alagoas	Batalha	BATALHA	32267.5	1996	4	0	0	0	0	0	0	0	0	0	0	0	0	1	0	0	1	0	0	0	0	-1	-1	-1	-1
876	Brazil	Alagoas	Batalha	BELO MONTE	33631.9	1996	4	37.42	0	37.42	0	37.42	0	37.42	0	37.42	32.54	32.54	128005	1	32.54	32.54	1.14997	147202	0	147202	0	0	0	100	1
877	Brazil	Alagoas	Batalha	JACARE DOS HOMENS	14346.8	1996	4	54.01	0	54.01	0	54.01	0	54.01	0	54.01	54.01	54.01	283854	1	54.01	54.01	1	283854	0	283854	0	0	0	100	1
878	Brazil	Alagoas	Batalha	JARAMATAIA	10412.1	1996	4	0	0	0	0	0	0	0	0	0	0	0	0	1	0	0	1	0	0	0	0	-1	-1	-1	-1
879	Brazil	Alagoas	Batalha	MAJOR ISIDORO	45626	1996	4	0	0	0	0	0	0	0	0	0	0	0	0	1	0	0	1	0	0	0	0	-1	-1	-1	-1
880	Brazil	Alagoas	Batalha	MONTEIROPOLIS	8544.11	1996	4	0	0	0	0	0	0	0	0	0	0	0	0	1	0	0	1	0	0	0	0	-1	-1	-1	-1
881	Brazil	Alagoas	Batalha	OLHO D'AGUA DAS FLORES	18353.8	1996	4	5.06	0	5.06	0	5.06	0	5.06	0	5.06	5.06	5.06	30197.1	1	5.06	5.06	1	30197.1	0	30197.1	0	0	0	100	1
882	Brazil	Alagoas	Batalha	OLIVENCA	17389.1	1996	4	0	0	0	0	0	0	0	0	0	0	0	0	1	0	0	1	0	0	0	0	-1	-1	-1	-1
883	Brazil	Alagoas	Litoral Norte Alagoano	JAPARATINGA	8658.66	1996	4	0	0	0	0	0	0	0	0	0	0	0	0	1	0	0	1	0	0	0	0	-1	-1	-1	-1
884	Brazil	Alagoas	Litoral Norte Alagoano	MARAGOGI	33438.9	1996	4	0	0	0	0	0	0	0	0	0	0	0	0	1	0	0	1	0	0	0	0	-1	-1	-1	-1
885	Brazil	Alagoas	Litoral Norte Alagoano	PASSO DE CAMARAGIBE	18741.9	1996	4	80.35	8.04	72.31	0	80.35	8.04	72.31	0	80.35	80.35	80.35	297356	1	80.35	80.35	1	297356	29754.1	267601	0	10.0062	0.100062	89.9938	0.899938
886	Brazil	Alagoas	Litoral Norte Alagoano	PORTO DE PEDRAS	26749.6	1996	4	27.45	7.14	20.31	0	27.45	7.14	20.31	0	27.45	27.45	27.45	113493	1	27.45	27.45	1	113493	29520.6	83972.5	0	26.0109	0.260109	73.9891	0.739891
887	Brazil	Alagoas	Litoral Norte Alagoano	SAO MIGUEL DOS MILAGRES	6446.54	1996	4	13.39	5.52	7.87	0	13.39	5.52	7.87	0	13.39	13.39	13.39	48862.5	1	13.39	13.39	1	48862.5	20143.5	28719	0	41.2248	0.412248	58.7752	0.587752
888	Brazil	Alagoas	Maceio	BARRA DE SANTO ANTONIO	13962.9	1996	4	223.15	111.58	111.57	0	223.15	111.58	111.57	0	223.15	223.15	223.15	837556	1	223.15	223.15	1	837556	418797	418759	0	50.0022	0.500022	49.9978	0.499978
889	Brazil	Alagoas	Maceio	BARRA DE SAO MIGUEL	7558.04	1996	4	11.29	1.63	9.66	0	11.29	1.63	9.66	0	11.29	11.29	11.29	49359	1	11.29	11.29	1	49359	7126.23	42232.8	0	14.4376	0.144376	85.5624	0.855624
890	Brazil	Alagoas	Maceio	COQUEIRO SECO	4094.7	1996	4	54.68	22.19	32.49	0	54.68	22.19	32.49	0	54.68	54.68	54.68	212856	1	54.68	54.68	1	212856	86380.3	126476	0	40.5816	0.405816	59.4184	0.594184
891	Brazil	Alagoas	Maceio	MACEIO	51402.8	1996	4	799.9	362.05	437.85	0	799.9	362.05	437.85	0	799.9	799.89	799.89	2.98852e+06	1	799.89	799.89	1.00001	2.98855e+06	1.35268e+06	1.63588e+06	0	45.2619	0.452619	54.7381	0.547381
892	Brazil	Alagoas	Maceio	MARECHAL DEODORO	36251.5	1996	4	837.01	197.3	639.71	0	837.01	197.3	639.71	0	837.01	837.01	837.01	3640396	1	837.01	837.01	1	3640396	858114	2.78228e+06	0	23.572	0.23572	76.428	0.76428
893	Brazil	Alagoas	Maceio	PARIPUEIRA	9350.79	1996	4	13.39	6.7	6.69	0	13.39	6.7	6.69	0	13.39	13.39	13.39	49887.7	1	13.39	13.39	1	49887.7	24962.5	24925.2	0	50.0373	0.500373	49.9627	0.499627
894	Brazil	Alagoas	Maceio	PILAR	22511.8	1996	4	2024.45	901.04	1123.41	0	2024.45	901.04	1123.41	0	2024.45	2024.45	2024.45	8733380	1	2024.45	2024.45	1	8733380	3.88704e+06	4.84634e+06	0	44.5079	0.445079	55.4921	0.554921
895	Brazil	Alagoas	Maceio	RIO LARGO	31016.8	1996	4	14905.5	4018.94	10886.6	0	14905.5	4018.94	10886.6	0	14905.5	14905.5	14905.5	63295020	1	14905.5	14905.5	1	63295020	1.70661e+07	4.62289e+07	0	26.9628	0.269628	73.0372	0.730372
896	Brazil	Alagoas	Maceio	SANTA LUZIA DO NORTE	2904.97	1996	4	0	0	0	0	0	0	0	0	0	0	0	0	1	0	0	1	0	0	0	0	-1	-1	-1	-1
897	Brazil	Alagoas	Maceio	SATUBA	4199.28	1996	4	44.64	22.32	22.32	0	44.64	22.32	22.32	0	44.64	44.64	44.64	174151	1	44.64	44.64	1	174151	87075.5	87075.5	0	50	0.5	50	0.5
898	Brazil	Alagoas	Mata Alagoana	ATALAIA	53277.8	1996	4	4467.2	1088.88	3378.32	0	4467.2	1088.88	3378.32	0	4467.2	4467.2	4467.2	19452116	1	4467.2	4467.2	1	19452116	4.74145e+06	1.47107e+07	0	24.375	0.24375	75.625	0.75625
899	Brazil	Alagoas	Mata Alagoana	BRANQUINHA	19144.7	1996	4	2158.88	0	2158.88	0	2158.88	0	2158.88	0	2158.88	2158.88	2158.88	10150818	1	2158.88	2158.88	1	10150818	0	10150818	0	0	0	100	1
900	Brazil	Alagoas	Mata Alagoana	CAJUEIRO	13668.8	1996	4	181.42	3.36	178.06	0	181.42	3.36	178.06	0	181.42	181.42	181.42	819101	1	181.42	181.42	1	819101	15170.2	803931	0	1.8521	0.0185206	98.1479	0.981479
901	Brazil	Alagoas	Mata Alagoana	CAPELA	22724.9	1996	4	734.85	61.23	673.62	0	734.85	61.23	673.62	0	734.85	734.85	734.85	3315107	1	734.85	734.85	1	3315107	276225	3.03888e+06	0	8.3323	0.0833231	91.6677	0.916677
902	Brazil	Alagoas	Mata Alagoana	COLONIA LEOPOLDINA	29520.9	1996	4	221.42	0	221.42	0	221.42	0	221.42	0	221.42	221.42	221.42	917964	1	221.42	221.42	1	917964	0	917964	0	0	0	100	1
903	Brazil	Alagoas	Mata Alagoana	FLEXEIRAS	31720.8	1996	4	717.37	0	717.37	0	717.37	0	717.37	0	717.37	717.37	717.37	3.08496e+06	1	717.37	717.37	1	3.08496e+06	0	3.08496e+06	0	0	0	100	1
904	Brazil	Alagoas	Mata Alagoana	JACUIPE	22037.5	1996	4	63.52	0	63.52	0	63.52	0	63.52	0	63.52	63.48	63.48	275547	1	63.48	63.48	1.00063	275721	0	275721	0	0	0	100	1
905	Brazil	Alagoas	Mata Alagoana	JOAQUIM GOMES	24234.5	1996	4	125.09	0	125.09	0	125.09	0	125.09	0	125.09	125.09	125.09	572701	1	125.09	125.09	1	572701	0	572701	0	0	0	100	1
906	Brazil	Alagoas	Mata Alagoana	JUNDIA	17534.2	1996	4	186.15	3.88	182.27	0	186.15	3.88	182.27	0	186.15	186.15	186.15	731117	1	186.15	186.15	1	731117	15239	715878	0	2.0843	0.0208434	97.9157	0.979157
907	Brazil	Alagoas	Mata Alagoana	MATRIZ DE CAMARAGIBE	33088.6	1996	4	74.1	18.52	55.58	0	74.1	18.52	55.58	0	74.1	74.1	74.1	314082	1	74.1	74.1	1	314082	78499.3	235583	0	24.9933	0.249933	75.0067	0.750067
908	Brazil	Alagoas	Mata Alagoana	MESSIAS	11316.8	1996	4	420.75	14.02	406.73	0	420.75	14.02	406.73	0	420.75	420.75	420.75	1.7048e+06	1	420.75	420.75	1	1.7048e+06	56806.4	1.64799e+06	0	3.3321	0.0333214	96.6679	0.966679
909	Brazil	Alagoas	Mata Alagoana	MURICI	42608.6	1996	4	1417.43	110.74	1306.69	0	1417.43	110.74	1306.69	0	1417.43	1417.43	1417.43	6700891	1	1417.43	1417.43	1	6700891	523523	6.17737e+06	0	7.8127	0.0781273	92.1873	0.921873
910	Brazil	Alagoas	Mata Alagoana	NOVO LINO	18659.5	1996	4	231.86	0	231.86	0	231.86	0	231.86	0	231.86	231.86	231.86	930922	1	231.86	231.86	1	930922	0	930922	0	0	0	100	1
911	Brazil	Alagoas	Mata Alagoana	PORTO CALVO	25890.6	1996	4	202.22	65.16	137.06	0	202.22	65.16	137.06	0	202.22	202.22	202.22	835546	1	202.22	202.22	1	835546	269232	566314	0	32.2223	0.322223	67.7777	0.677777
912	Brazil	Alagoas	Mata Alagoana	SAO LUIS DO QUITUNDE	40623.4	1996	4	0	0	0	0	0	0	0	0	0	0	0	0	1	0	0	1	0	0	0	0	-1	-1	-1	-1
913	Brazil	Alagoas	Palmeira dos Indios	BELEM	4863.12	1996	4	0	0	0	0	0	0	0	0	0	0	0	0	1	0	0	1	0	0	0	0	-1	-1	-1	-1
914	Brazil	Alagoas	Palmeira dos Indios	CACIMBINHAS	27298.9	1996	4	0	0	0	0	0	0	0	0	0	0	0	0	1	0	0	1	0	0	0	0	-1	-1	-1	-1
915	Brazil	Alagoas	Palmeira dos Indios	ESTRELA DE ALAGOAS	26530.1	1996	4	0	0	0	0	0	0	0	0	0	0	0	0	1	0	0	1	0	0	0	0	-1	-1	-1	-1
916	Brazil	Alagoas	Palmeira dos Indios	IGACI	33587.1	1996	4	2.83	0	2.83	0	2.83	0	2.83	0	2.83	2.83	2.83	11373	1	2.83	2.83	1	11373	0	11373	0	0	0	100	1
917	Brazil	Alagoas	Palmeira dos Indios	MAR VERMELHO	9115.31	1996	4	8.71	0	8.71	0	8.71	0	8.71	0	8.71	8.71	8.71	37768.2	1	8.71	8.71	1	37768.2	0	37768.2	0	0	0	100	1
918	Brazil	Alagoas	Palmeira dos Indios	MARIBONDO	17252.9	1996	4	13.06	0	13.06	0	13.06	0	13.06	0	13.06	13.06	13.06	60266.2	1	13.06	13.06	1	60266.2	0	60266.2	0	0	0	100	1
919	Brazil	Alagoas	Palmeira dos Indios	MINADOR DO NEGRAO	16784.7	1996	4	0	0	0	0	0	0	0	0	0	0	0	0	1	0	0	1	0	0	0	0	-1	-1	-1	-1
920	Brazil	Alagoas	Palmeira dos Indios	PALMEIRA DOS INDIOS	46266.7	1996	4	28.57	2	26.57	0	28.57	2	26.57	0	28.57	28.57	28.57	151671	1	28.57	28.57	1	151671	10617.5	141053	0	7.0004	0.0700035	92.9996	0.929996
921	Brazil	Alagoas	Palmeira dos Indios	PAULO JACINTO	10844	1996	4	18.4	0	18.4	0	18.4	0	18.4	0	18.4	18.4	18.4	79407.8	1	18.4	18.4	1	79407.8	0	79407.8	0	0	0	100	1
922	Brazil	Alagoas	Palmeira dos Indios	QUEBRANGULO	32150.6	1996	4	162.8	0	162.8	0	162.8	0	162.8	0	162.8	162.8	162.8	654663	1	162.8	162.8	1	654663	0	654663	0	0	0	100	1
923	Brazil	Alagoas	Palmeira dos Indios	TANQUE D'ARCA	15561.4	1996	4	3.37	0.67	2.7	0	3.37	0.67	2.7	0	3.37	3.37	3.37	16342.4	1	3.37	3.37	1	16342.4	3249.08	13093.3	0	19.8813	0.198813	80.1187	0.801187
924	Brazil	Alagoas	Penedo	FELIZ DESERTO	9338.82	1996	4	0	0	0	0	0	0	0	0	0	0	0	0	1	0	0	1	0	0	0	0	-1	-1	-1	-1
925	Brazil	Alagoas	Penedo	IGREJA NOVA	42895.7	1996	4	5101.34	970.09	4131.25	0	5101.34	970.09	4131.25	0	5101.34	3383.2	3383.2	13963111	1	3383.2	3383.2	1.50784	2.10542e+07	4.00375e+06	1.70505e+07	0	19.0164	0.190164	80.9836	0.809836
926	Brazil	Alagoas	Penedo	PENEDO	69103.8	1996	4	1650.43	835.43	815	0	1650.43	835.43	815	0	1650.43	1504.08	1504.08	6.03758e+06	1	1504.08	1504.08	1.0973	6.62505e+06	3.35353e+06	3.27152e+06	0	50.6189	0.506189	49.3811	0.493811
927	Brazil	Alagoas	Penedo	PIACABUCU	24548.8	1996	4	174.92	17.49	157.43	0	174.92	17.49	157.43	0	174.92	174.92	174.92	824752	1	174.92	174.92	1	824752	82465.8	742286	0	9.9989	0.0999886	90.0011	0.900011
928	Brazil	Alagoas	Penedo	PORTO REAL DO COLEGIO	23825.3	1996	4	1078.81	34.85	1043.96	0	1078.81	34.85	1043.96	0	1078.81	819.4	819.4	3579507	1	819.4	819.4	1.31659	4.71273e+06	152240	4.56049e+06	0	3.2304	0.0323041	96.7696	0.967696
929	Brazil	Alagoas	Santana do Ipanema	CARNEIROS	11405	1996	4	0	0	0	0	0	0	0	0	0	0	0	0	1	0	0	1	0	0	0	0	-1	-1	-1	-1
930	Brazil	Alagoas	Santana do Ipanema	DOIS RIACHOS	14212	1996	4	0.67	0	0.67	0	0.67	0	0.67	0	0.67	0.67	0.67	4446.1	1	0.67	0.67	1	4446.1	0	4446.1	0	0	0	100	1
931	Brazil	Alagoas	Santana do Ipanema	MARAVILHA	28247	1996	4	0	0	0	0	0	0	0	0	0	0	0	0	1	0	0	1	0	0	0	0	-1	-1	-1	-1
932	Brazil	Alagoas	Santana do Ipanema	OURO BRANCO	20473.6	1996	4	0	0	0	0	0	0	0	0	0	0	0	0	1	0	0	1	0	0	0	0	-1	-1	-1	-1
933	Brazil	Alagoas	Santana do Ipanema	PALESTINA	4876.66	1996	4	0	0	0	0	0	0	0	0	0	0	0	0	1	0	0	1	0	0	0	0	-1	-1	-1	-1
934	Brazil	Alagoas	Santana do Ipanema	PAO DE ACUCAR	66316.3	1996	4	57.68	0	57.68	0	57.68	0	57.68	0	57.68	45.29	45.29	205570	1	45.29	45.29	1.27357	261808	0	261808	0	0	0	100	1
935	Brazil	Alagoas	Santana do Ipanema	POCO DAS TRINCHEIRAS	30355.4	1996	4	14.72	0	14.72	0	14.72	0	14.72	0	14.72	14.71	14.71	105513	1	14.71	14.71	1.00068	105585	0	105585	0	0	0	100	1
936	Brazil	Alagoas	Santana do Ipanema	SANTANA DO IPANEMA	43980.2	1996	4	2.83	2	0.83	0	2.83	2	0.83	0	2.83	2.83	2.83	19423.7	1	2.83	2.83	1	19423.7	13727	5696.69	0	70.6714	0.706714	29.3286	0.293286
937	Brazil	Alagoas	Santana do Ipanema	SAO JOSE DA TAPERA	52230.2	1996	4	0.2	0	0.2	0	0.2	0	0.2	0	0.2	0.2	0.2	1466.78	1	0.2	0.2	1	1466.78	0	1466.78	0	0	0	100	1
938	Brazil	Alagoas	Santana do Ipanema	SENADOR RUI PALMEIRA	36003	1996	4	0	0	0	0	0	0	0	0	0	0	0	0	1	0	0	1	0	0	0	0	-1	-1	-1	-1
939	Brazil	Alagoas	Sao Miguel dos Campos	ANADIA	19067.2	1996	4	1604.95	647.16	957.79	0	1604.95	647.16	957.79	0	1604.95	1604.95	1604.95	7.94698e+06	1	1604.95	1604.95	1	7.94698e+06	3.20444e+06	4.74254e+06	0	40.3228	0.403228	59.6772	0.596772
940	Brazil	Alagoas	Sao Miguel dos Campos	BOCA DA MATA	18714.9	1996	4	2236.07	927.54	1308.53	0	2236.07	927.54	1308.53	0	2236.07	2236.07	2236.07	9871958	1	2236.07	2236.07	1	9871958	4.09497e+06	5.77699e+06	0	41.4808	0.414808	58.5192	0.585192
941	Brazil	Alagoas	Sao Miguel dos Campos	CAMPO ALEGRE	29653.6	1996	4	2965.85	1482.93	1482.92	0	2965.85	1482.93	1482.92	0	2965.85	2965.85	2965.85	14796937	1	2965.85	2965.85	1	14796937	7.39849e+06	7.39844e+06	0	50.0002	0.500002	49.9998	0.499998
942	Brazil	Alagoas	Sao Miguel dos Campos	CORURIPE	97515.4	1996	4	9316.17	4196.02	5120.15	0	9316.17	4196.02	5120.15	0	9316.17	9316.17	9316.17	41207812	1	9316.17	9316.17	1	41207812	1.85601e+07	2.26477e+07	0	45.0402	0.450402	54.9598	0.549598
943	Brazil	Alagoas	Sao Miguel dos Campos	JUNQUEIRO	22335.3	1996	4	984.67	492.33	492.34	0	984.67	492.33	492.34	0	984.67	984.67	984.67	5154246	1	984.67	984.67	1	5154246	2.5771e+06	2.57715e+06	0	49.9995	0.499995	50.0005	0.500005
944	Brazil	Alagoas	Sao Miguel dos Campos	ROTEIRO	13009.8	1996	4	1084.76	433.85	650.91	0	1084.76	433.85	650.91	0	1084.76	1084.76	1084.76	4720914	1	1084.76	1084.76	1	4720914	1.88813e+06	2.83278e+06	0	39.995	0.39995	60.005	0.60005
945	Brazil	Alagoas	Sao Miguel dos Campos	SAO MIGUEL DOS CAMPOS	65748.1	1996	4	4334.84	1920.35	2414.49	0	4334.84	1920.35	2414.49	0	4334.84	4334.84	4334.84	18471044	1	4334.84	4334.84	1	18471044	8.18274e+06	1.02883e+07	0	44.3004	0.443004	55.6996	0.556996
946	Brazil	Alagoas	Sao Miguel dos Campos	TEOTONIO VILELA	29720.1	1996	4	2360.95	1118.99	1241.96	0	2360.95	1118.99	1241.96	0	2360.95	2360.95	2360.95	12145174	1	2360.95	2360.95	1	12145174	5.7563e+06	6.38888e+06	0	47.3958	0.473958	52.6042	0.526042
947	Brazil	Alagoas	Serrana do Sertao Alagoano	AGUA BRANCA	45625.7	1996	4	0.13	0	0.13	0	0.13	0	0.13	0	0.13	0.13	0.13	1189.6	1	0.13	0.13	1	1189.6	0	1189.6	0	0	0	100	1
948	Brazil	Alagoas	Serrana do Sertao Alagoano	CANAPI	57406.1	1996	4	2.7	0	2.7	0	2.7	0	2.7	0	2.7	2.7	2.7	25455.8	1	2.7	2.7	1	25455.8	0	25455.8	0	0	0	100	1
949	Brazil	Alagoas	Serrana do Sertao Alagoano	INHAPI	37625.6	1996	4	0	0	0	0	0	0	0	0	0	0	0	0	1	0	0	1	0	0	0	0	-1	-1	-1	-1
950	Brazil	Alagoas	Serrana do Sertao Alagoano	MATA GRANDE	92205.8	1996	4	13.41	0	13.41	0	13.41	0	13.41	0	13.41	13.41	13.41	125628	1	13.41	13.41	1	125628	0	125628	0	0	0	100	1
951	Brazil	Alagoas	Serrana do Sertao Alagoano	PARICONHA	26324.8	1996	4	0	0	0	0	0	0	0	0	0	0	0	0	1	0	0	1	0	0	0	0	-1	-1	-1	-1
952	Brazil	Alagoas	Serrana dos Quilombos	CHA PRETA	20188.2	1996	4	105.5	0	105.5	0	105.5	0	105.5	0	105.5	105.5	105.5	458393	1	105.5	105.5	1	458393	0	458393	0	0	0	100	1
953	Brazil	Alagoas	Serrana dos Quilombos	IBATEGUARA	25583.9	1996	4	760.84	0	760.84	0	760.84	0	760.84	0	760.84	760.84	760.84	3249076	1	760.84	760.84	1	3249076	0	3249076	0	0	0	100	1
954	Brazil	Alagoas	Serrana dos Quilombos	PINDOBA	8463.05	1996	4	0.27	0	0.27	0	0.27	0	0.27	0	0.27	0.27	0.27	1212.29	1	0.27	0.27	1	1212.29	0	1212.29	0	0	0	100	1
955	Brazil	Alagoas	Serrana dos Quilombos	SANTANA DO MUNDAU	22563.4	1996	4	189.2	0	189.2	0	189.2	0	189.2	0	189.2	189.2	189.2	867007	1	189.2	189.2	1	867007	0	867007	0	0	0	100	1
956	Brazil	Alagoas	Serrana dos Quilombos	SAO JOSE DA LAJE	27166.1	1996	4	1725.35	0	1725.35	0	1725.35	0	1725.35	0	1725.35	1725.1	1725.1	7408963	1	1725.1	1725.1	1.00014	7.41004e+06	0	7.41004e+06	0	0	0	100	1
957	Brazil	Alagoas	Serrana dos Quilombos	UNIAO DOS PALMARES	42902.2	1996	4	2268.88	124.58	2144.3	0	2268.88	124.58	2144.3	0	2268.88	2268.88	2268.88	10304738	1	2268.88	2268.88	1	10304738	565814	9.73892e+06	0	5.4908	0.0549081	94.5092	0.945092
958	Brazil	Alagoas	Serrana dos Quilombos	VICOSA	32429.6	1996	4	185.1	0	185.1	0	185.1	0	185.1	0	185.1	185.1	185.1	812556	1	185.1	185.1	1	812556	0	812556	0	0	0	100	1
959	Brazil	Alagoas	Traipu	OLHO D'AGUA GRANDE	11953.9	1996	4	1.62	0.02	1.6	0	1.62	0.02	1.6	0	1.62	1.53	1.53	7372.82	1	1.53	1.53	1.05882	7806.52	96.38	7710.14	0	1.2346	0.0123457	98.7654	0.987654
960	Brazil	Alagoas	Traipu	SAO BRAS	13922.2	1996	4	18	0	18	0	18	0	18	0	18	18	18	91063.6	1	18	18	1	91063.6	0	91063.6	0	0	0	100	1
961	Brazil	Alagoas	Traipu	TRAIPU	70143.2	1996	4	6.68	2	4.68	0	6.68	2	4.68	0	6.68	6.14	6.14	28556.9	1	6.14	6.14	1.08795	31068.4	9301.91	21766.5	0	29.9401	0.299401	70.0599	0.700599
962	Brazil	Amapa	Amapa	AMAPA	920689	1996	4	0	0	0	0	0	0	0	0	0	0	0	0	1	0	0	1	0	0	0	0	-1	-1	-1	-1
963	Brazil	Amapa	Amapa	PRACUUBA	497958	1996	4	0	0	0	0	0	0	0	0	0	0	0	0	1	0	0	1	0	0	0	0	-1	-1	-1	-1
964	Brazil	Amapa	Amapa	TARTARUGALZINHO	673970	1996	4	0	0	0	0	0	0	0	0	0	0	0	0	1	0	0	1	0	0	0	0	-1	-1	-1	-1
965	Brazil	Amapa	Macapa	CUTIAS	212304	1996	4	0	0	0	0	0	0	0	0	0	0	0	0	1	0	0	1	0	0	0	0	-1	-1	-1	-1
966	Brazil	Amapa	Macapa	FERREIRA GOMES	506825	1996	4	0	0	0	0	0	0	0	0	0	0	0	0	1	0	0	1	0	0	0	0	-1	-1	-1	-1
967	Brazil	Amapa	Macapa	ITAUBAL	156900	1996	4	2.51	1.61	0.9	0	2.51	1.61	0.9	0	2.51	2.48	2.48	7601.64	1	2.48	2.48	1.0121	7693.6	4934.94	2758.66	0	64.1434	0.641434	35.8566	0.358566
968	Brazil	Amapa	Macapa	MACAPA	656684	1996	4	20.61	17.4	3.21	0	20.61	17.4	3.21	0	20.61	16.56	16.56	50546.4	1	16.56	16.56	1.24457	62908.3	53110.4	9797.95	0	84.425	0.84425	15.575	0.15575
969	Brazil	Amapa	Macapa	PEDRA BRANCA DO AMAPARI	952974	1996	4	0	0	0	0	0	0	0	0	0	0	0	0	1	0	0	1	0	0	0	0	-1	-1	-1	-1
970	Brazil	Amapa	Macapa	PORTO GRANDE	441870	1996	4	0.25	0.13	0.12	0	0.25	0.13	0.12	0	0.25	0.24	0.24	714.6	1	0.24	0.24	1.04167	744.38	387.08	357.3	0	52	0.52	48	0.48
971	Brazil	Amapa	Macapa	SANTANA	159833	1996	4	1.05	0.56	0.49	0	1.05	0.56	0.49	0	1.05	0.99	0.99	2937.54	1	0.99	0.99	1.06061	3115.57	1661.64	1453.93	0	53.3333	0.533333	46.6667	0.466667
972	Brazil	Amapa	Macapa	SERRA DO NAVIO	779140	1996	4	0	0	0	0	0	0	0	0	0	0	0	0	1	0	0	1	0	0	0	0	-1	-1	-1	-1
973	Brazil	Amapa	Mazagao	LARANJAL DO JARI	3.34623e+06	1996	4	1885.06	0	1885.06	0	1885.06	0	1885.06	0	1885.06	121	121	368987	1	121	121	15.579	5.74845e+06	0	5.74845e+06	0	0	0	100	1
974	Brazil	Amapa	Mazagao	MAZAGAO	1.31975e+06	1996	4	0.1	0	0.1	0	0.1	0	0.1	0	0.1	0.08	0.08	231.07	1	0.08	0.08	1.25	288.84	0	288.84	0	0	0	100	1
975	Brazil	Amapa	Oiapoque	CALCOENE	1.43332e+06	1996	4	0	0	0	0	0	0	0	0	0	0	0	0	1	0	0	1	0	0	0	0	-1	-1	-1	-1
976	Brazil	Amapa	Oiapoque	OIAPOQUE	2.28358e+06	1996	4	0.42	0	0.42	0	0.42	0	0.42	0	0.42	0.28	0.28	639.38	1	0.28	0.28	1.5	959.07	0	959.07	0	0	0	100	1
977	Brazil	Amazonas	Alto Solimoes	AMATURA	477571	1996	4	0	0	0	0	0	0	0	0	0	0	0	0	1	0	0	1	0	0	0	0	-1	-1	-1	-1
978	Brazil	Amazonas	Alto Solimoes	ATALAIA DO NORTE	7.66004e+06	1996	4	0	0	0	0	0	0	0	0	0	0	0	0	1	0	0	1	0	0	0	0	-1	-1	-1	-1
979	Brazil	Amazonas	Alto Solimoes	BENJAMIN CONSTANT	878448	1996	4	0	0	0	0	0	0	0	0	0	0	0	0	1	0	0	1	0	0	0	0	-1	-1	-1	-1
980	Brazil	Amazonas	Alto Solimoes	FONTE BOA	1.21692e+06	1996	4	0	0	0	0	0	0	0	0	0	0	0	0	1	0	0	1	0	0	0	0	-1	-1	-1	-1
981	Brazil	Amazonas	Alto Solimoes	JUTAI	6.98582e+06	1996	4	0	0	0	0	0	0	0	0	0	0	0	0	1	0	0	1	0	0	0	0	-1	-1	-1	-1
982	Brazil	Amazonas	Alto Solimoes	SANTO ANTONIO DO ICA	1.22924e+06	1996	4	0	0	0	0	0	0	0	0	0	0	0	0	1	0	0	1	0	0	0	0	-1	-1	-1	-1
983	Brazil	Amazonas	Alto Solimoes	SAO PAULO DE OLIVENCA	1.99164e+06	1996	4	0	0	0	0	0	0	0	0	0	0	0	0	1	0	0	1	0	0	0	0	-1	-1	-1	-1
984	Brazil	Amazonas	Alto Solimoes	TABATINGA	321086	1996	4	0	0	0	0	0	0	0	0	0	0	0	0	1	0	0	1	0	0	0	0	-1	-1	-1	-1
985	Brazil	Amazonas	Alto Solimoes	TONANTINS	645188	1996	4	0	0	0	0	0	0	0	0	0	0	0	0	1	0	0	1	0	0	0	0	-1	-1	-1	-1
986	Brazil	Amazonas	Boca do Acre	BOCA DO ACRE	2.25052e+06	1996	4	0	0	0	0	0	0	0	0	0	0	0	0	1	0	0	1	0	0	0	0	-1	-1	-1	-1
987	Brazil	Amazonas	Boca do Acre	PAUINI	4.34362e+06	1996	4	19.62	0	19.62	0	19.62	0	19.62	0	19.62	2.22	2.22	2383.96	1	2.22	2.22	8.83784	21069	0	21069	0	0	0	100	1
988	Brazil	Amazonas	Coari	ANAMA	246427	1996	4	0	0	0	0	0	0	0	0	0	0	0	0	1	0	0	1	0	0	0	0	-1	-1	-1	-1
989	Brazil	Amazonas	Coari	ANORI	627554	1996	4	0	0	0	0	0	0	0	0	0	0	0	0	1	0	0	1	0	0	0	0	-1	-1	-1	-1
990	Brazil	Amazonas	Coari	BERURI	1.73187e+06	1996	4	0	0	0	0	0	0	0	0	0	0	0	0	1	0	0	1	0	0	0	0	-1	-1	-1	-1
991	Brazil	Amazonas	Coari	CAAPIRANGA	949998	1996	4	0	0	0	0	0	0	0	0	0	0	0	0	1	0	0	1	0	0	0	0	-1	-1	-1	-1
992	Brazil	Amazonas	Coari	COARI	5.75268e+06	1996	4	0	0	0	0	0	0	0	0	0	0	0	0	1	0	0	1	0	0	0	0	-1	-1	-1	-1
993	Brazil	Amazonas	Coari	CODAJAS	1.8986e+06	1996	4	0	0	0	0	0	0	0	0	0	0	0	0	1	0	0	1	0	0	0	0	-1	-1	-1	-1
994	Brazil	Amazonas	Itacoatiara	ITACOATIARA	894971	1996	4	0	0	0	0	0	0	0	0	0	0	0	0	1	0	0	1	0	0	0	0	-1	-1	-1	-1
995	Brazil	Amazonas	Itacoatiara	ITAPIRANGA	424253	1996	4	0	0	0	0	0	0	0	0	0	0	0	0	1	0	0	1	0	0	0	0	-1	-1	-1	-1
996	Brazil	Amazonas	Itacoatiara	NOVA OLINDA DO NORTE	563106	1996	4	0	0	0	0	0	0	0	0	0	0	0	0	1	0	0	1	0	0	0	0	-1	-1	-1	-1
997	Brazil	Amazonas	Itacoatiara	SILVES	374845	1996	4	0	0	0	0	0	0	0	0	0	0	0	0	1	0	0	1	0	0	0	0	-1	-1	-1	-1
998	Brazil	Amazonas	Itacoatiara	URUCURITUBA	292501	1996	4	0	0	0	0	0	0	0	0	0	0	0	0	1	0	0	1	0	0	0	0	-1	-1	-1	-1
999	Brazil	Amazonas	Japura	JAPURA	5.57549e+06	1996	4	0	0	0	0	0	0	0	0	0	0	0	0	1	0	0	1	0	0	0	0	-1	-1	-1	-1
1000	Brazil	Amazonas	Japura	MARAA	1.69876e+06	1996	4	0	0	0	0	0	0	0	0	0	0	0	0	1	0	0	1	0	0	0	0	-1	-1	-1	-1
1001	Brazil	Amazonas	Jurua	CARAUARI	2.58982e+06	1996	4	0	0	0	0	0	0	0	0	0	0	0	0	1	0	0	1	0	0	0	0	-1	-1	-1	-1
1002	Brazil	Amazonas	Jurua	EIRUNEPE	1.59464e+06	1996	4	0	0	0	0	0	0	0	0	0	0	0	0	1	0	0	1	0	0	0	0	-1	-1	-1	-1
1003	Brazil	Amazonas	Jurua	ENVIRA	1.33674e+06	1996	4	0	0	0	0	0	0	0	0	0	0	0	0	1	0	0	1	0	0	0	0	-1	-1	-1	-1
1004	Brazil	Amazonas	Jurua	GUAJARA	898559	1996	4	0	0	0	0	0	0	0	0	0	0	0	0	1	0	0	1	0	0	0	0	-1	-1	-1	-1
1005	Brazil	Amazonas	Jurua	IPIXUNA	1.36284e+06	1996	4	0	0	0	0	0	0	0	0	0	0	0	0	1	0	0	1	0	0	0	0	-1	-1	-1	-1
1006	Brazil	Amazonas	Jurua	ITAMARATI	2.53881e+06	1996	4	0	0	0	0	0	0	0	0	0	0	0	0	1	0	0	1	0	0	0	0	-1	-1	-1	-1
1007	Brazil	Amazonas	Jurua	JURUA	1.94662e+06	1996	4	0	0	0	0	0	0	0	0	0	0	0	0	1	0	0	1	0	0	0	0	-1	-1	-1	-1
1008	Brazil	Amazonas	Madeira	APUI	5.42243e+06	1996	4	0	0	0	0	0	0	0	0	0	0	0	0	1	0	0	1	0	0	0	0	-1	-1	-1	-1
1009	Brazil	Amazonas	Madeira	BORBA	4.4443e+06	1996	4	0	0	0	0	0	0	0	0	0	0	0	0	1	0	0	1	0	0	0	0	-1	-1	-1	-1
1010	Brazil	Amazonas	Madeira	HUMAITA	3.32045e+06	1996	4	0	0	0	0	0	0	0	0	0	0	0	0	1	0	0	1	0	0	0	0	-1	-1	-1	-1
1011	Brazil	Amazonas	Madeira	MANICORE	4.84904e+06	1996	4	0	0	0	0	0	0	0	0	0	0	0	0	1	0	0	1	0	0	0	0	-1	-1	-1	-1
1012	Brazil	Amazonas	Madeira	NOVO ARIPUANA	4.15659e+06	1996	4	0	0	0	0	0	0	0	0	0	0	0	0	1	0	0	1	0	0	0	0	-1	-1	-1	-1
1013	Brazil	Amazonas	Manaus	AUTAZES	762843	1996	4	0	0	0	0	0	0	0	0	0	0	0	0	1	0	0	1	0	0	0	0	-1	-1	-1	-1
1014	Brazil	Amazonas	Manaus	CAREIRO DA VARZEA	264124	1996	4	0	0	0	0	0	0	0	0	0	0	0	0	1	0	0	1	0	0	0	0	-1	-1	-1	-1
1015	Brazil	Amazonas	Manaus	CAREIRO	612655	1996	4	74.13	37.06	37.07	0	74.13	37.06	37.07	0	74.13	17.07	17.07	23945.8	1	17.07	17.07	4.34271	103990	51987.8	52001.9	0	49.9933	0.499933	50.0067	0.500067
1016	Brazil	Amazonas	Manaus	IRANDUBA	221551	1996	4	30.52	30.26	0.26	0	30.52	30.26	0.26	0	30.52	8.81	8.81	12069	1	8.81	8.81	3.46425	41809.8	41453.7	356.18	0	99.1481	0.991481	0.8519	0.008519
1017	Brazil	Amazonas	Manaus	MANACAPURU	736383	1996	4	937.46	441.15	496.31	0	937.46	441.15	496.31	0	937.46	103.48	103.48	114193	1	103.48	103.48	9.05934	1.03451e+06	486822	547693	0	47.058	0.47058	52.942	0.52942
1018	Brazil	Amazonas	Manaus	MANAQUIRI	398523	1996	4	0	0	0	0	0	0	0	0	0	0	0	0	1	0	0	1	0	0	0	0	-1	-1	-1	-1
1019	Brazil	Amazonas	Manaus	MANAUS	1.14576e+06	1996	4	220.2	200.1	20.1	0	220.2	200.1	20.1	0	220.2	20.09	20.09	25097.3	1	20.09	20.09	10.961	275083	249974	25109.8	0	90.8719	0.908719	9.1281	0.0912807
1020	Brazil	Amazonas	Parintins	BARREIRINHA	575463	1996	4	0	0	0	0	0	0	0	0	0	0	0	0	1	0	0	1	0	0	0	0	-1	-1	-1	-1
1021	Brazil	Amazonas	Parintins	BOA VISTA DO RAMOS	259379	1996	4	0	0	0	0	0	0	0	0	0	0	0	0	1	0	0	1	0	0	0	0	-1	-1	-1	-1
1022	Brazil	Amazonas	Parintins	MAUES	4.01294e+06	1996	4	0	0	0	0	0	0	0	0	0	0	0	0	1	0	0	1	0	0	0	0	-1	-1	-1	-1
1023	Brazil	Amazonas	Parintins	NHAMUNDA	1.41729e+06	1996	4	0	0	0	0	0	0	0	0	0	0	0	0	1	0	0	1	0	0	0	0	-1	-1	-1	-1
1024	Brazil	Amazonas	Parintins	PARINTINS	600314	1996	4	87.21	43.6	43.61	0	87.21	43.6	43.61	0	87.21	20.56	20.56	36601.6	1	20.56	20.56	4.24173	155254	77618.2	77636	0	49.9943	0.499943	50.0057	0.500057
1025	Brazil	Amazonas	Parintins	SAO SEBASTIAO DO UATUMA	1.07889e+06	1996	4	0	0	0	0	0	0	0	0	0	0	0	0	1	0	0	1	0	0	0	0	-1	-1	-1	-1
1026	Brazil	Amazonas	Parintins	URUCARA	2.80299e+06	1996	4	0	0	0	0	0	0	0	0	0	0	0	0	1	0	0	1	0	0	0	0	-1	-1	-1	-1
1027	Brazil	Amazonas	Purus	CANUTAMA	2.9949e+06	1996	4	0	0	0	0	0	0	0	0	0	0	0	0	1	0	0	1	0	0	0	0	-1	-1	-1	-1
1028	Brazil	Amazonas	Purus	LABREA	6.85139e+06	1996	4	0	0	0	0	0	0	0	0	0	0	0	0	1	0	0	1	0	0	0	0	-1	-1	-1	-1
1029	Brazil	Amazonas	Purus	TAPAUA	8.96939e+06	1996	4	0	0	0	0	0	0	0	0	0	0	0	0	1	0	0	1	0	0	0	0	-1	-1	-1	-1
1030	Brazil	Amazonas	Rio Negro	BARCELOS	1.23388e+07	1996	4	0	0	0	0	0	0	0	0	0	0	0	0	1	0	0	1	0	0	0	0	-1	-1	-1	-1
1031	Brazil	Amazonas	Rio Negro	NOVO AIRAO	3.79366e+06	1996	4	0	0	0	0	0	0	0	0	0	0	0	0	1	0	0	1	0	0	0	0	-1	-1	-1	-1
1032	Brazil	Amazonas	Rio Negro	SANTA ISABEL DO RIO NEGRO	6.2526e+06	1996	4	0	0	0	0	0	0	0	0	0	0	0	0	1	0	0	1	0	0	0	0	-1	-1	-1	-1
1033	Brazil	Amazonas	Rio Negro	SAO GABRIEL DA CACHOEIRA	1.08982e+07	1996	4	0	0	0	0	0	0	0	0	0	0	0	0	1	0	0	1	0	0	0	0	-1	-1	-1	-1
1034	Brazil	Amazonas	Rio Preto da Eva	PRESIDENTE FIGUEIREDO	2.55386e+06	1996	4	61.92	30.96	30.96	0	61.92	30.96	30.96	0	61.92	2.74	2.74	3232.23	1	2.74	2.74	22.599	73043.7	36521.8	36521.8	0	50	0.5	50	0.5
1035	Brazil	Amazonas	Rio Preto da Eva	RIO PRETO DA EVA	583576	1996	4	388.94	374.47	14.47	0	388.94	374.47	14.47	0	388.94	32.8	32.8	41819.5	1	32.8	32.8	11.858	495893	477444	18449	0	96.2796	0.962796	3.7204	0.0372037
1036	Brazil	Amazonas	Tefe	ALVARAES	594277	1996	4	0	0	0	0	0	0	0	0	0	0	0	0	1	0	0	1	0	0	0	0	-1	-1	-1	-1
1037	Brazil	Amazonas	Tefe	TEFE	2.37953e+06	1996	4	0	0	0	0	0	0	0	0	0	0	0	0	1	0	0	1	0	0	0	0	-1	-1	-1	-1
1038	Brazil	Amazonas	Tefe	UARINI	1.02918e+06	1996	4	0	0	0	0	0	0	0	0	0	0	0	0	1	0	0	1	0	0	0	0	-1	-1	-1	-1
1039	Brazil	Bahia	Alagoinhas	ACAJUTIBA	26818.7	1996	4	1.8	0.9	0.9	0	1.8	0.9	0.9	0	1.8	1.8	1.8	3618.56	1	1.8	1.8	1	3618.56	1809.28	1809.28	0	50	0.5	50	0.5
1040	Brazil	Bahia	Alagoinhas	ALAGOINHAS	73594.2	1996	4	37.73	18.98	18.75	0	37.73	18.98	18.75	0	37.73	37.1	37.1	71250.6	1	37.1	37.1	1.01698	72460.5	36451.1	36009.4	0	50.3048	0.503048	49.6952	0.496952
1041	Brazil	Bahia	Alagoinhas	APORA	59973.9	1996	4	1.75	1.75	0	0	1.75	1.75	0	0	1.75	1.74	1.74	3617.04	1	1.74	1.74	1.00575	3637.83	3637.83	0	0	100	1	0	0
1042	Brazil	Bahia	Alagoinhas	ARACAS	42142.6	1996	4	23.68	11.84	11.84	0	23.68	11.84	11.84	0	23.68	23.68	23.68	36826.2	1	23.68	23.68	1	36826.2	18413.1	18413.1	0	50	0.5	50	0.5
1043	Brazil	Bahia	Alagoinhas	ARAMARI	33120.1	1996	4	163.95	81.97	81.98	0	163.95	81.97	81.98	0	163.95	159.52	159.52	299689	1	159.52	159.52	1.02777	308012	153996	154015	0	49.997	0.49997	50.003	0.50003
1044	Brazil	Bahia	Alagoinhas	CRISOPOLIS	46479.4	1996	4	6.1	3.05	3.05	0	6.1	3.05	3.05	0	6.1	6.1	6.1	14160	1	6.1	6.1	1	14160	7079.98	7079.98	0	50	0.5	50	0.5
1045	Brazil	Bahia	Alagoinhas	INHAMBUPE	124844	1996	4	1618.89	959.45	659.44	0	1618.89	959.45	659.44	0	1618.89	1550.57	1550.57	3165966	1	1550.57	1550.57	1.04406	3.30546e+06	1.95901e+06	1.34645e+06	0	59.2659	0.592659	40.7341	0.407341
1046	Brazil	Bahia	Alagoinhas	RIO REAL	73773.2	1996	4	434.05	217.03	217.02	0	434.05	217.03	217.02	0	434.05	434.05	434.05	1.15138e+06	1	434.05	434.05	1	1.15138e+06	575703	575676	0	50.0012	0.500012	49.9988	0.499988
1047	Brazil	Bahia	Alagoinhas	SATIRO DIAS	69126.1	1996	4	0	0	0	0	0	0	0	0	0	0	0	0	1	0	0	1	0	0	0	0	-1	-1	-1	-1
1048	Brazil	Bahia	Barra	BARRA	1234891	1996	4	1075.84	101.6	974.24	0	1075.84	101.6	974.24	0	1075.84	673.48	673.48	5805449	1	673.48	673.48	1.59743	9.27382e+06	875800	8.39802e+06	0	9.4438	0.0944378	90.5562	0.905562
1049	Brazil	Bahia	Barra	BURITIRAMA	381204	1996	4	0	0	0	0	0	0	0	0	0	0	0	0	1	0	0	1	0	0	0	0	-1	-1	-1	-1
1050	Brazil	Bahia	Barra	IBOTIRAMA	139563	1996	4	771.61	76.67	694.94	0	771.61	76.67	694.94	0	771.61	534.02	534.02	4.31232e+06	1	534.02	534.02	1.44491	6.23091e+06	619126	5.61178e+06	0	9.9364	0.0993637	90.0636	0.900636
1051	Brazil	Bahia	Barra	ITAGUACU DA BAHIA	458758	1996	4	1198.06	241.81	956.25	0	1198.06	241.81	956.25	0	1198.06	541.65	541.65	4.66864e+06	1	541.65	541.65	2.21187	1.03264e+07	2.08423e+06	8.2422e+06	0	20.1835	0.201835	79.8165	0.798165
1052	Brazil	Bahia	Barra	MORPARA	174001	1996	4	0	0	0	0	0	0	0	0	0	0	0	0	1	0	0	1	0	0	0	0	-1	-1	-1	-1
1053	Brazil	Bahia	Barra	MUQUEM DE SAO FRANCISCO	287490	1996	4	2160.09	2029.96	130.13	0	2160.09	2029.96	130.13	0	2160.09	1426.33	1426.33	10665216	1	1426.33	1426.33	1.51444	1.61518e+07	1.51788e+07	973032	0	93.9757	0.939757	6.0243	0.0602429
1054	Brazil	Bahia	Barra	XIQUE-XIQUE	599059	1996	4	1132.43	370.71	761.72	0	1132.43	370.71	761.72	0	1132.43	1039.81	1039.81	8.14237e+06	1	1039.81	1039.81	1.08907	8.86765e+06	2.9029e+06	5.96475e+06	0	32.7358	0.327358	67.2642	0.672642
1055	Brazil	Bahia	Barreiras	BAIANOPOLIS	342621	1996	4	1167.77	1167.77	0	0	1167.77	1167.77	0	0	1167.77	1167.77	1167.77	7.91008e+06	1	1167.77	1167.77	1	7.91008e+06	7.91008e+06	0	0	100	1	0	0
1056	Brazil	Bahia	Barreiras	BARREIRAS	1.19887e+06	1996	4	31467.2	31467.2	0	0	31467.2	31467.2	0	0	31467.2	23193	23193	121729328	1	23193	23193	1.35675	1.65157e+08	1.65157e+08	0	0	100	1	0	0
1057	Brazil	Bahia	Barreiras	CATOLANDIA	62462.1	1996	4	235.33	235.33	0	0	235.33	235.33	0	0	235.33	135.95	135.95	809147	1	135.95	135.95	1.731	1.40064e+06	1.40064e+06	0	0	100	1	0	0
1058	Brazil	Bahia	Barreiras	FORMOSA DO RIO PRETO	1.65282e+06	1996	4	1782.45	1543.78	238.67	0	1782.45	1543.78	238.67	0	1782.45	1764.21	1764.21	9840591	1	1764.21	1764.21	1.01034	9.94233e+06	8611054	1.33128e+06	0	86.61	0.8661	13.39	0.1339
1059	Brazil	Bahia	Barreiras	RIACHAO DAS NEVES	585022	1996	4	936	936	0	0	936	936	0	0	936	623.55	623.55	3820325	1	623.55	623.55	1.50108	5.73462e+06	5.73462e+06	0	0	100	1	0	0
1060	Brazil	Bahia	Barreiras	SAO DESIDERIO	1.48708e+06	1996	4	19436.7	19436.7	0	0	19436.7	19436.7	0	0	19436.7	14837	14754.5	76488944	1	14837	14754.5	1.31001	1.00201e+08	1.00201e+08	0	0	100	1	0	0
1061	Brazil	Bahia	Bom Jesus da Lapa	BOM JESUS DA LAPA	414704	1996	4	4961.87	3624.59	1337.28	0	4961.87	3624.59	1337.28	0	4961.87	3456.87	3456.87	26324914	1	3456.87	3456.87	1.43536	3.77859e+07	2.76021e+07	1.01837e+07	0	73.0489	0.730489	26.9511	0.269511
1062	Brazil	Bahia	Bom Jesus da Lapa	CARINHANHA	276068	1996	4	629.96	458.58	171.38	0	629.96	458.58	171.38	0	629.96	622.84	622.84	4.67139e+06	1	622.84	622.84	1.01143	4.72479e+06	3.43942e+06	1.28537e+06	0	72.7951	0.727951	27.2049	0.272049
1063	Brazil	Bahia	Bom Jesus da Lapa	FEIRA DA MATA	165947	1996	4	276.88	239.76	37.12	0	276.88	239.76	37.12	0	276.88	276.12	274.61	2.004e+06	1	276.12	274.61	1.00275	2.00951e+06	1.74011e+06	269406	0	86.5935	0.865935	13.4065	0.134065
1064	Brazil	Bahia	Bom Jesus da Lapa	PARATINGA	282421	1996	4	81.91	7.44	74.47	0	81.91	7.44	74.47	0	81.91	81.89	81.89	714358	1	81.89	81.89	1.00024	714533	64902	649631	0	9.0831	0.0908314	90.9169	0.909169
1065	Brazil	Bahia	Bom Jesus da Lapa	SERRA DO RAMALHO	268181	1996	4	675.48	72.41	603.07	0	675.48	72.41	603.07	0	675.48	378.7	378.7	2824942	1	378.7	378.7	1.78368	5.0388e+06	540148	4.49865e+06	0	10.7198	0.107198	89.2802	0.892802
1066	Brazil	Bahia	Bom Jesus da Lapa	SITIO DO MATO	171697	1996	4	525.86	182.11	343.75	0	525.86	182.11	343.75	0	525.86	501.9	501.9	4.0697e+06	1	501.9	501.9	1.04774	4.26399e+06	1.47666e+06	2.78733e+06	0	34.6309	0.346309	65.3691	0.653691
1067	Brazil	Bahia	Boquira	BOQUIRA	156984	1996	4	41.09	0.76	40.33	0	41.09	0.76	40.33	0	41.09	41.08	41.08	336781	1	41.08	41.08	1.00024	336863	6230.61	330632	0	1.8496	0.018496	98.1504	0.981504
1068	Brazil	Bahia	Boquira	BOTUPORA	55490.2	1996	4	20.82	0	20.82	0	20.82	0	20.82	0	20.82	20.82	20.82	165991	1	20.82	20.82	1	165991	0	165991	0	0	0	100	1
1069	Brazil	Bahia	Boquira	BROTAS DE MACAUBAS	234869	1996	4	48.88	3.3	45.58	0	48.88	3.3	45.58	0	48.88	48.45	48.45	373015	1	48.45	48.45	1.00888	376326	25406.6	350919	0	6.7512	0.0675123	93.2488	0.932488
1070	Brazil	Bahia	Boquira	CATURAMA	64662.6	1996	4	128.13	0	128.13	0	128.13	0	128.13	0	128.13	128.13	128.13	944665	1	128.13	128.13	1	944665	0	944665	0	0	0	100	1
1071	Brazil	Bahia	Boquira	IBIPITANGA	95023.5	1996	4	11.61	0	11.61	0	11.61	0	11.61	0	11.61	11.55	11.55	95186.4	1	11.55	11.55	1.00519	95680.9	0	95680.9	0	0	0	100	1
1072	Brazil	Bahia	Boquira	IBITIARA	175319	1996	4	4.07	0.05	4.02	0	4.07	0.05	4.02	0	4.07	4.06	4.06	32035.7	1	4.06	4.06	1.00246	32114.6	394.53	31720.1	0	1.2285	0.012285	98.7715	0.987715
1073	Brazil	Bahia	Boquira	IPUPIARA	133388	1996	4	10.72	1.05	9.67	0	10.72	1.05	9.67	0	10.72	10.72	10.72	101760	1	10.72	10.72	1	101760	9967.19	91793.1	0	9.7948	0.0979478	90.2052	0.902052
1074	Brazil	Bahia	Boquira	MACAUBAS	304767	1996	4	199.27	0.01	199.26	0	199.27	0.01	199.26	0	199.27	199.26	199.26	1.58763e+06	1	199.26	199.26	1.00005	1.58771e+06	79.68	1.58763e+06	0	0.005	5.01832e-05	99.995	0.99995
1075	Brazil	Bahia	Boquira	NOVO HORIZONTE	61387.8	1996	4	329.57	2	327.57	0	329.57	2	327.57	0	329.57	329.57	329.57	2.00769e+06	1	329.57	329.57	1	2.00769e+06	12183.7	1.99551e+06	0	0.6069	0.00606851	99.3931	0.993931
1076	Brazil	Bahia	Boquira	OLIVEIRA DOS BREJINHOS	358551	1996	4	477.68	47.77	429.91	0	477.68	47.77	429.91	0	477.68	251.2	251.2	1860831	1	251.2	251.2	1.90159	3.53854e+06	353869	3.18467e+06	0	10.0004	0.100004	89.9996	0.899996
1077	Brazil	Bahia	Boquira	TANQUE NOVO	82929.7	1996	4	14.68	1.11	13.57	0	14.68	1.11	13.57	0	14.68	14.68	14.68	101960	1	14.68	14.68	1	101960	7709.51	94250.5	0	7.5613	0.0756131	92.4387	0.924387
1078	Brazil	Bahia	Brumado	ARACATU	154317	1996	4	16.02	4	12.02	0	16.02	4	12.02	0	16.02	16.02	16.02	93226.9	1	16.02	16.02	1	93226.9	23277.6	69949.2	0	24.9688	0.249688	75.0312	0.750312
1079	Brazil	Bahia	Brumado	BRUMADO	217287	1996	4	402.6	8	394.6	0	402.6	8	394.6	0	402.6	402.6	402.6	2.41042e+06	1	402.6	402.6	1	2.41042e+06	47897	2.36252e+06	0	1.9871	0.0198708	98.0129	0.980129
1080	Brazil	Bahia	Brumado	CARAIBAS	127329	1996	4	400.4	2	398.4	0	400.4	2	398.4	0	400.4	400.4	400.4	2.32726e+06	1	400.4	400.4	1	2.32726e+06	11624.7	2.31563e+06	0	0.4995	0.004995	99.5005	0.995005
1081	Brazil	Bahia	Brumado	CONDEUBA	124053	1996	4	376.44	35.5	340.94	0	376.44	35.5	340.94	0	376.44	376.44	376.44	2.29391e+06	1	376.44	376.44	1	2.29391e+06	216326	2.07759e+06	0	9.4305	0.0943045	90.5695	0.905695
1082	Brazil	Bahia	Brumado	CORDEIROS	55726.5	1996	4	90.09	4.74	85.35	0	90.09	4.74	85.35	0	90.09	90.1	90.09	544224	1	90.1	90.09	1	544224	28633.8	515590	0	5.2614	0.0526141	94.7386	0.947386
1083	Brazil	Bahia	Brumado	GUAJERU	64842.4	1996	4	0	0	0	0	0	0	0	0	0	0	0	0	1	0	0	1	0	0	0	0	-1	-1	-1	-1
1084	Brazil	Bahia	Brumado	ITUACU	122062	1996	4	1583.4	1.65	1581.75	0	1583.4	1.65	1581.75	0	1583.4	1512.43	1512.43	8806816	1	1512.43	1512.43	1.04692	9.22007e+06	9607.88	9.21046e+06	0	0.1042	0.00104206	99.8958	0.998958
1085	Brazil	Bahia	Brumado	MAETINGA	36967.6	1996	4	0	0	0	0	0	0	0	0	0	0	0	0	1	0	0	1	0	0	0	0	-1	-1	-1	-1
1086	Brazil	Bahia	Brumado	MALHADA DE PEDRAS	48230.4	1996	4	0	0	0	0	0	0	0	0	0	0	0	0	1	0	0	1	0	0	0	0	-1	-1	-1	-1
1087	Brazil	Bahia	Brumado	PIRIPA	64863.8	1996	4	19.75	0.71	19.04	0	19.75	0.71	19.04	0	19.75	19.75	19.75	120703	1	19.75	19.75	1	120703	4339.19	116364	0	3.5949	0.0359494	96.4051	0.964051
1088	Brazil	Bahia	Brumado	PRESIDENTE JANIO QUADROS	133392	1996	4	0	0	0	0	0	0	0	0	0	0	0	0	1	0	0	1	0	0	0	0	-1	-1	-1	-1
1089	Brazil	Bahia	Brumado	RIO DO ANTONIO	98819.6	1996	4	101.43	0	101.43	0	101.43	0	101.43	0	101.43	101.43	101.43	683075	1	101.43	101.43	1	683075	0	683075	0	0	0	100	1
1090	Brazil	Bahia	Brumado	TANHACU	134532	1996	4	2321.13	0	2321.13	0	2321.13	0	2321.13	0	2321.13	2074.85	2074.85	10036743	1	2074.85	2074.85	1.1187	1.12281e+07	0	1.12281e+07	0	0	0	100	1
1091	Brazil	Bahia	Brumado	TREMEDAL	164030	1996	4	88.76	0.52	88.24	0	88.76	0.52	88.24	0	88.76	88.76	88.76	492064	1	88.76	88.76	1	492064	2882.76	489182	0	0.5858	0.00585849	99.4142	0.994142
1092	Brazil	Bahia	Catu	AMELIA RODRIGUES	15304.4	1996	4	10446	1557.7	8888.25	0	10446	1557.7	8888.25	0	10446	8062.22	8062.22	12020292	1	8062.22	8062.22	1.29567	1.55743e+07	2.32244e+06	1.32519e+07	0	14.912	0.14912	85.088	0.85088
1093	Brazil	Bahia	Catu	CATU	51893	1996	4	4.64	2.32	2.32	0	4.64	2.32	2.32	0	4.64	4.63	4.63	8247.27	1	4.63	4.63	1.00216	8265.08	4132.54	4132.54	0	50	0.5	50	0.5
1094	Brazil	Bahia	Catu	ITANAGRA	45426.4	1996	4	0	0	0	0	0	0	0	0	0	0	0	0	1	0	0	1	0	0	0	0	-1	-1	-1	-1
1095	Brazil	Bahia	Catu	MATA DE SAO JOAO	68789.9	1996	4	248.14	95.01	153.13	0	248.14	95.01	153.13	0	248.14	248.14	248.14	433728	1	248.14	248.14	1	433728	166070	267659	0	38.2889	0.382889	61.7111	0.617111
1096	Brazil	Bahia	Catu	POJUCA	28093	1996	4	31.93	15.97	15.96	0	31.93	15.97	15.96	0	31.93	31.93	31.93	48465	1	31.93	31.93	1	48465	24240.1	24224.9	0	50.0157	0.500157	49.9843	0.499843
1097	Brazil	Bahia	Catu	SAO SEBASTIAO DO PASSE	55372.5	1996	4	41.55	16.8	24.75	0	41.55	16.8	24.75	0	41.55	41.55	41.55	61284.4	1	41.55	41.55	1	61284.4	24779.3	36505.2	0	40.4332	0.404332	59.5668	0.595668
1098	Brazil	Bahia	Catu	TERRA NOVA	15632.3	1996	4	6.67	0	6.67	0	6.67	0	6.67	0	6.67	6.67	6.67	8942.03	1	6.67	6.67	1	8942.03	0	8942.03	0	0	0	100	1
1099	Brazil	Bahia	Cotegipe	ANGICAL	149560	1996	4	328.03	123.94	204.09	0	328.03	123.94	204.09	0	328.03	275.98	275.98	1.76143e+06	1	275.98	275.98	1.1886	2.09363e+06	791040	1.30259e+06	0	37.7831	0.377831	62.2169	0.622169
1100	Brazil	Bahia	Cotegipe	BREJOLANDIA	263311	1996	4	2.32	2.32	0	0	2.32	2.32	0	0	2.32	2.26	2.26	20440.6	1	2.26	2.26	1.02655	20983.2	20983.2	0	0	100	1	0	0
1101	Brazil	Bahia	Cotegipe	COTEGIPE	416086	1996	4	1360.65	271.89	1088.76	0	1360.65	271.89	1088.76	0	1360.65	827.15	827.15	5140142	1	827.15	827.15	1.64499	8.45546e+06	1.6896e+06	6.76586e+06	0	19.9824	0.199824	80.0176	0.800176
1102	Brazil	Bahia	Cotegipe	CRISTOPOLIS	88432.9	1996	4	135.63	135.63	0	0	135.63	135.63	0	0	135.63	135.63	135.63	1.04957e+06	1	135.63	135.63	1	1.04957e+06	1.04957e+06	0	0	100	1	0	0
1103	Brazil	Bahia	Cotegipe	MANSIDAO	316066	1996	4	0	0	0	0	0	0	0	0	0	0	0	0	1	0	0	1	0	0	0	0	-1	-1	-1	-1
1104	Brazil	Bahia	Cotegipe	SANTA RITA DE CASSIA	609256	1996	4	42.71	4.27	38.44	0	42.71	4.27	38.44	0	42.71	42.71	42.71	285981	1	42.71	42.71	1	285981	28591.4	257390	0	9.9977	0.0999766	90.0023	0.900023
1105	Brazil	Bahia	Cotegipe	TABOCAS DO BREJO VELHO	155570	1996	4	19.55	19.55	0	0	19.55	19.55	0	0	19.55	19.52	19.52	164545	1	19.52	19.52	1.00154	164798	164798	0	0	100	1	0	0
1106	Brazil	Bahia	Cotegipe	WANDERLEY	305573	1996	4	0	0	0	0	0	0	0	0	0	0	0	0	1	0	0	1	0	0	0	0	-1	-1	-1	-1
1107	Brazil	Bahia	Entre Rios	CARDEAL DA SILVA	19795.6	1996	4	0	0	0	0	0	0	0	0	0	0	0	0	1	0	0	1	0	0	0	0	-1	-1	-1	-1
1108	Brazil	Bahia	Entre Rios	CONDE	94994.9	1996	4	0.57	0.13	0.44	0	0.57	0.13	0.44	0	0.57	0.57	0.57	1045.05	1	0.57	0.57	1	1045.05	238.34	806.71	0	22.807	0.22807	77.193	0.77193
1109	Brazil	Bahia	Entre Rios	ENTRE RIOS	116665	1996	4	74.06	20.64	53.42	0	74.06	20.64	53.42	0	74.06	74.05	74.05	123406	1	74.05	74.05	1.00014	123423	34397.1	89025.7	0	27.8693	0.278693	72.1307	0.721307
1110	Brazil	Bahia	Entre Rios	ESPLANADA	141095	1996	4	239.63	110	129.63	0	239.63	110	129.63	0	239.63	239.63	239.63	439040	1	239.63	239.63	1	439040	201538	237503	0	45.9041	0.459041	54.0959	0.540959
1111	Brazil	Bahia	Entre Rios	JANDAIRA	64366	1996	4	1.16	0.48	0.68	0	1.16	0.48	0.68	0	1.16	1.16	1.16	2809.23	1	1.16	1.16	1	2809.23	1162.44	1646.79	0	41.3793	0.413793	58.6207	0.586207
1112	Brazil	Bahia	Euclides da Cunha	CANSANCAO	132334	1996	4	42.74	0	42.74	0	42.74	0	42.74	0	42.74	42.74	42.74	194023	1	42.74	42.74	1	194023	0	194023	0	0	0	100	1
1113	Brazil	Bahia	Euclides da Cunha	CANUDOS	299902	1996	4	1382.16	114.94	1267.22	0	1382.16	114.94	1267.22	0	1382.16	1115.04	1115.04	8.34273e+06	1	1115.04	1115.04	1.23956	1.03413e+07	859981	9.48134e+06	0	8.316	0.0831597	91.684	0.91684
1114	Brazil	Bahia	Euclides da Cunha	EUCLIDES DA CUNHA	238404	1996	4	3.23	0.02	3.21	0	3.23	0.02	3.21	0	3.23	3.22	3.22	16088.2	1	3.22	3.22	1.00311	16138.2	99.93	16038.2	0	0.6192	0.00619195	99.3808	0.993808
1115	Brazil	Bahia	Euclides da Cunha	MONTE SANTO	330022	1996	4	0	0	0	0	0	0	0	0	0	0	0	0	1	0	0	1	0	0	0	0	-1	-1	-1	-1
1116	Brazil	Bahia	Euclides da Cunha	NORDESTINA	47448.9	1996	4	8.13	0	8.13	0	8.13	0	8.13	0	8.13	8.13	8.13	42541.2	1	8.13	8.13	1	42541.2	0	42541.2	0	0	0	100	1
1117	Brazil	Bahia	Euclides da Cunha	QUEIMADAS	210572	1996	4	126.43	1.79	124.64	0	126.43	1.79	124.64	0	126.43	126.42	126.42	690278	1	126.42	126.42	1.00008	690332	9773.74	680558	0	1.4158	0.014158	98.5842	0.985842
1118	Brazil	Bahia	Euclides da Cunha	QUIJINGUE	127560	1996	4	58.54	3.9	54.64	0	58.54	3.9	54.64	0	58.54	58.53	58.53	217913	1	58.53	58.53	1.00017	217950	14520.1	203430	0	6.6621	0.0666211	93.3379	0.933379
1119	Brazil	Bahia	Euclides da Cunha	TUCANO	321369	1996	4	111.58	111.58	0	0	111.58	111.58	0	0	111.58	111.56	111.56	382335	1	111.56	111.56	1.00018	382404	382404	0	0	100	1	0	0
1120	Brazil	Bahia	Euclides da Cunha	UAUA	296449	1996	4	2	0	2	0	2	0	2	0	2	1.95	1.95	16843.4	1	1.95	1.95	1.02564	17275.3	0	17275.3	0	0	0	100	1
1121	Brazil	Bahia	Feira de Santana	AGUA FRIA	71025.6	1996	4	0	0	0	0	0	0	0	0	0	0	0	0	1	0	0	1	0	0	0	0	-1	-1	-1	-1
1122	Brazil	Bahia	Feira de Santana	ANGUERA	17131.2	1996	4	8.72	0	8.72	0	8.72	0	8.72	0	8.72	8.72	8.72	20312	1	8.72	8.72	1	20312	0	20312	0	0	0	100	1
1123	Brazil	Bahia	Feira de Santana	ANTONIO CARDOSO	29433.5	1996	4	7.55	0	7.55	0	7.55	0	7.55	0	7.55	7.55	7.55	15092.5	1	7.55	7.55	1	15092.5	0	15092.5	0	0	0	100	1
1124	Brazil	Bahia	Feira de Santana	CONCEICAO DA FEIRA	16124.1	1996	4	360.36	4	356.36	0	360.36	4	356.36	0	360.36	360.36	360.36	470117	1	360.36	360.36	1	470117	5218.3	464899	0	1.11	0.0111	98.89	0.9889
1125	Brazil	Bahia	Feira de Santana	CONCEICAO DO JACUIPE	14579.5	1996	4	329.65	48.48	281.17	0	329.65	48.48	281.17	0	329.65	289.66	289.66	362189	1	289.66	289.66	1.13806	412193	60619.2	351574	0	14.7065	0.147065	85.2935	0.852935
1126	Brazil	Bahia	Feira de Santana	CORACAO DE MARIA	35992.7	1996	4	9.34	0	9.34	0	9.34	0	9.34	0	9.34	9.23	9.23	18077.2	1	9.23	9.23	1.01192	18292.6	0	18292.6	0	0	0	100	1
1127	Brazil	Bahia	Feira de Santana	ELISIO MEDRADO	19914.4	1996	4	24.12	0	24.12	0	24.12	0	24.12	0	24.12	24.12	24.12	23907	1	24.12	24.12	1	23907	0	23907	0	0	0	100	1
1128	Brazil	Bahia	Feira de Santana	FEIRA DE SANTANA	133634	1996	4	627.55	176.57	450.98	0	627.55	176.57	450.98	0	627.55	619.99	619.99	999738	1	619.99	619.99	1.01219	1.01193e+06	284720	727208	0	28.1364	0.281364	71.8636	0.718636
1129	Brazil	Bahia	Feira de Santana	IPECAETA	39504	1996	4	0	0	0	0	0	0	0	0	0	0	0	0	1	0	0	1	0	0	0	0	-1	-1	-1	-1
1130	Brazil	Bahia	Feira de Santana	IPIRA	303462	1996	4	0.57	0.57	0	0	0.57	0.57	0	0	0.57	0.56	0.56	2049.2	1	0.56	0.56	1.01786	2085.79	2085.79	0	0	100	1	0	0
1131	Brazil	Bahia	Feira de Santana	IRARA	27088.5	1996	4	15.11	2	13.11	0	15.11	2	13.11	0	15.11	15.11	15.11	28025.6	1	15.11	15.11	1	28025.6	3709.55	24316.1	0	13.2363	0.132363	86.7637	0.867637
1132	Brazil	Bahia	Feira de Santana	ITATIM	57766.7	1996	4	849.4	0	849.4	0	849.4	0	849.4	0	849.4	712.04	712.04	1.85994e+06	1	712.04	712.04	1.19291	2.21874e+06	0	2.21874e+06	0	0	0	100	1
1133	Brazil	Bahia	Feira de Santana	OURICANGAS	17031.8	1996	4	1.75	0.54	1.21	0	1.75	0.54	1.21	0	1.75	1.75	1.75	3701.94	1	1.75	1.75	1	3701.94	1142.31	2559.63	0	30.8571	0.308571	69.1429	0.691429
1134	Brazil	Bahia	Feira de Santana	PEDRAO	14921.4	1996	4	13.35	0	13.35	0	13.35	0	13.35	0	13.35	13.35	13.35	28111	1	13.35	13.35	1	28111	0	28111	0	0	0	100	1
1135	Brazil	Bahia	Feira de Santana	PINTADAS	53390.2	1996	4	8.13	0	8.13	0	8.13	0	8.13	0	8.13	8.12	8.12	33132.7	1	8.12	8.12	1.00123	33173.5	0	33173.5	0	0	0	100	1
1136	Brazil	Bahia	Feira de Santana	RAFAEL JAMBEIRO	124022	1996	4	127.89	0	127.89	0	127.89	0	127.89	0	127.89	127.47	127.47	358440	1	127.47	127.47	1.00329	359621	0	359621	0	0	0	100	1
1137	Brazil	Bahia	Feira de Santana	SANTA BARBARA	32634.7	1996	4	69.78	0	69.78	0	69.78	0	69.78	0	69.78	69.78	69.78	123089	1	69.78	69.78	1	123089	0	123089	0	0	0	100	1
1138	Brazil	Bahia	Feira de Santana	SANTA TERESINHA	71199.3	1996	4	139.21	0	139.21	0	139.21	0	139.21	0	139.21	139.21	139.21	241706	1	139.21	139.21	1	241706	0	241706	0	0	0	100	1
1139	Brazil	Bahia	Feira de Santana	SANTANOPOLIS	21344.5	1996	4	0	0	0	0	0	0	0	0	0	0	0	0	1	0	0	1	0	0	0	0	-1	-1	-1	-1
1140	Brazil	Bahia	Feira de Santana	SANTO ESTEVAO	36560.1	1996	4	4.07	2	2.07	0	4.07	2	2.07	0	4.07	4.07	4.07	9320.37	1	4.07	4.07	1	9320.37	4580.03	4740.34	0	49.14	0.4914	50.86	0.5086
1141	Brazil	Bahia	Feira de Santana	SAO GONCALO DOS CAMPOS	29600.4	1996	4	48.6	6.61	41.99	0	48.6	6.61	41.99	0	48.6	48.07	48.07	66159.7	1	48.07	48.07	1.01103	66889.2	9097.48	57791.7	0	13.6008	0.136008	86.3992	0.863992
1142	Brazil	Bahia	Feira de Santana	SERRA PRETA	54157.9	1996	4	0	0	0	0	0	0	0	0	0	0	0	0	1	0	0	1	0	0	0	0	-1	-1	-1	-1
1143	Brazil	Bahia	Feira de Santana	TANQUINHO	21503.3	1996	4	0	0	0	0	0	0	0	0	0	0	0	0	1	0	0	1	0	0	0	0	-1	-1	-1	-1
1144	Brazil	Bahia	Feira de Santana	TEODORO SAMPAIO	23225.2	1996	4	10.46	4.01	6.45	0	10.46	4.01	6.45	0	10.46	10.46	10.46	16697.2	1	10.46	10.46	1	16697.2	6401.14	10296.1	0	38.3365	0.383365	61.6635	0.616635
1145	Brazil	Bahia	Guanambi	CACULE	68825.8	1996	4	522.06	0	522.06	0	522.06	0	522.06	0	522.06	448.64	448.64	2.90564e+06	1	448.64	448.64	1.16365	3.38115e+06	0	3.38115e+06	0	0	0	100	1
1146	Brazil	Bahia	Guanambi	CAETITE	236382	1996	4	414.15	27.85	386.3	0	414.15	27.85	386.3	0	414.15	413.2	413.2	2.92637e+06	1	413.2	413.2	1.0023	2.9331e+06	197240	2.73586e+06	0	6.7246	0.0672462	93.2754	0.932754
1147	Brazil	Bahia	Guanambi	CANDIBA	39906.4	1996	4	212.95	0	212.95	0	212.95	0	212.95	0	212.95	212.95	212.95	1.5941e+06	1	212.95	212.95	1	1.5941e+06	0	1.5941e+06	0	0	0	100	1
1148	Brazil	Bahia	Guanambi	GUANAMBI	126755	1996	4	675.92	2	673.92	0	675.92	2	673.92	0	675.92	643.36	643.36	4558539	1	643.36	643.36	1.05061	4.78924e+06	14171	4.77507e+06	0	0.2959	0.00295893	99.7041	0.997041
1149	Brazil	Bahia	Guanambi	IBIASSUCE	38329.8	1996	4	82.75	0	82.75	0	82.75	0	82.75	0	82.75	82.75	82.75	577167	1	82.75	82.75	1	577167	0	577167	0	0	0	100	1
1150	Brazil	Bahia	Guanambi	IGAPORA	77857.9	1996	4	34.7	0.4	34.3	0	34.7	0.4	34.3	0	34.7	34.69	34.69	272459	1	34.69	34.69	1.00029	272537	3141.64	269396	0	1.1527	0.0115274	98.8473	0.988473
1151	Brazil	Bahia	Guanambi	IUIU	110220	1996	4	116.78	116.78	0	0	116.78	116.78	0	0	116.78	116.77	116.77	855447	1	116.77	116.77	1.00009	855521	855521	0	0	100	1	0	0
1152	Brazil	Bahia	Guanambi	JACARACI	124716	1996	4	143.81	12.21	131.6	0	143.81	12.21	131.6	0	143.81	143.81	143.8	1.02796e+06	1	143.81	143.8	1	1.02796e+06	87277.8	940685	0	8.4904	0.0849037	91.5096	0.915096
1153	Brazil	Bahia	Guanambi	LAGOA REAL	100162	1996	4	54.39	0.45	53.94	0	54.39	0.45	53.94	0	54.39	54.39	54.39	389772	1	54.39	54.39	1	389772	3224.81	386548	0	0.8274	0.00827358	99.1726	0.991726
1154	Brazil	Bahia	Guanambi	LICINIO DE ALMEIDA	79032.3	1996	4	16.6	1.17	15.43	0	16.6	1.17	15.43	0	16.6	16.6	16.6	118746	1	16.6	16.6	1	118746	8369.44	110377	0	7.0482	0.0704819	92.9518	0.929518
1155	Brazil	Bahia	Guanambi	MALHADA	197496	1996	4	1673.01	1452.72	220.29	0	1673.01	1452.72	220.29	0	1673.01	1682.97	1672.55	12032518	1	1682.97	1672.55	1	12032518	1.04482e+07	1.58436e+06	0	86.8327	0.868327	13.1673	0.131673
1156	Brazil	Bahia	Guanambi	MATINA	79208.7	1996	4	5.34	0	5.34	0	5.34	0	5.34	0	5.34	5.33	5.33	44334.3	1	5.33	5.33	1.00188	44417.5	0	44417.5	0	0	0	100	1
1157	Brazil	Bahia	Guanambi	MORTUGABA	66943.5	1996	4	0.67	0.06	0.61	0	0.67	0.06	0.61	0	0.67	0.67	0.67	4618.57	1	0.67	0.67	1	4618.57	413.6	4204.97	0	8.9552	0.0895522	91.0448	0.910448
1158	Brazil	Bahia	Guanambi	PALMAS DE MONTE ALTO	278221	1996	4	72.47	0	72.47	0	72.47	0	72.47	0	72.47	72.47	72.47	525950	1	72.47	72.47	1	525950	0	525950	0	0	0	100	1
1159	Brazil	Bahia	Guanambi	PINDAI	71676.1	1996	4	106.31	2	104.31	0	106.31	2	104.31	0	106.31	106.31	106.31	747707	1	106.31	106.31	1	747707	14066.5	733641	0	1.8813	0.0188129	98.1187	0.981187
1160	Brazil	Bahia	Guanambi	RIACHO DE SANTANA	270908	1996	4	131.93	19.78	112.15	0	131.93	19.78	112.15	0	131.93	131.92	131.92	973398	1	131.92	131.92	1.00008	973471	145951	827521	0	14.9928	0.149928	85.0072	0.850072
1161	Brazil	Bahia	Guanambi	SEBASTIAO LARANJEIRAS	201241	1996	4	1034.05	0.43	1033.62	0	1034.05	0.43	1033.62	0	1034.05	586.29	586.29	3.81154e+06	1	586.29	586.29	1.76372	6.72248e+06	2795.48	6.71968e+06	0	0.0416	0.000415841	99.9584	0.999584
1162	Brazil	Bahia	Guanambi	URANDI	89822.2	1996	4	1251.4	26	1225.4	0	1251.4	26	1225.4	0	1251.4	1162.77	1162.35	7499489	1	1162.77	1162.35	1.07622	8.07112e+06	167692	7.90343e+06	0	2.0777	0.0207767	97.9223	0.979223
1163	Brazil	Bahia	Ilheus-Itabuna	ALMADINA	24685.2	1996	4	0	0	0	0	0	0	0	0	0	0	0	0	1	0	0	1	0	0	0	0	-1	-1	-1	-1
1164	Brazil	Bahia	Ilheus-Itabuna	ARATACA	39851	1996	4	0	0	0	0	0	0	0	0	0	0	0	0	1	0	0	1	0	0	0	0	-1	-1	-1	-1
1165	Brazil	Bahia	Ilheus-Itabuna	AURELINO LEAL	44817.8	1996	4	99.17	0	99.17	0	99.17	0	99.17	0	99.17	99.17	99.17	133941	1	99.17	99.17	1	133941	0	133941	0	0	0	100	1
1166	Brazil	Bahia	Ilheus-Itabuna	BARRA DO ROCHA	19206.8	1996	4	2.67	2	0.67	0	2.67	2	0.67	0	2.67	2.67	2.67	4334.22	1	2.67	2.67	1	4334.22	3246.61	1087.61	0	74.9064	0.749064	25.0936	0.250936
1167	Brazil	Bahia	Ilheus-Itabuna	BARRO PRETO	12159.6	1996	4	136.14	0	136.14	0	136.14	0	136.14	0	136.14	136.14	136.14	313618	1	136.14	136.14	1	313618	0	313618	0	0	0	100	1
1168	Brazil	Bahia	Ilheus-Itabuna	BELMONTE	202012	1996	4	1.33	0.32	1.01	0	1.33	0.32	1.01	0	1.33	1.32	1.32	1574.8	1	1.32	1.32	1.00758	1586.73	381.77	1204.96	0	24.0602	0.240602	75.9398	0.759398
1169	Brazil	Bahia	Ilheus-Itabuna	BUERAREMA	20951.2	1996	4	0	0	0	0	0	0	0	0	0	0	0	0	1	0	0	1	0	0	0	0	-1	-1	-1	-1
1170	Brazil	Bahia	Ilheus-Itabuna	CAMACAN	63544.7	1996	4	2.67	2	0.67	0	2.67	2	0.67	0	2.67	2.67	2.67	5437.1	1	2.67	2.67	1	5437.1	4072.73	1364.37	0	74.9064	0.749064	25.0936	0.250936
1171	Brazil	Bahia	Ilheus-Itabuna	CANAVIEIRAS	137628	1996	4	13.35	5.3	8.05	0	13.35	5.3	8.05	0	13.35	13.34	13.34	15487.4	1	13.34	13.34	1.00075	15499	6153.18	9345.86	0	39.7004	0.397004	60.2996	0.602996
1172	Brazil	Bahia	Ilheus-Itabuna	COARACI	29856.3	1996	4	90.76	0	90.76	0	90.76	0	90.76	0	90.76	84.68	84.68	117236	1	84.68	84.68	1.0718	125654	0	125654	0	0	0	100	1
1173	Brazil	Bahia	Ilheus-Itabuna	FIRMINO ALVES	16015.1	1996	4	0	0	0	0	0	0	0	0	0	0	0	0	1	0	0	1	0	0	0	0	-1	-1	-1	-1
1174	Brazil	Bahia	Ilheus-Itabuna	FLORESTA AZUL	35395.1	1996	4	5.34	0	5.34	0	5.34	0	5.34	0	5.34	5.34	5.34	8591.8	1	5.34	5.34	1	8591.8	0	8591.8	0	0	0	100	1
1175	Brazil	Bahia	Ilheus-Itabuna	GANDU	22950.1	1996	4	1.33	0	1.33	0	1.33	0	1.33	0	1.33	1.33	1.33	1710.99	1	1.33	1.33	1	1710.99	0	1710.99	0	0	0	100	1
1176	Brazil	Bahia	Ilheus-Itabuna	GONGOGI	19779.2	1996	4	0	0	0	0	0	0	0	0	0	0	0	0	1	0	0	1	0	0	0	0	-1	-1	-1	-1
1177	Brazil	Bahia	Ilheus-Itabuna	IBICARAI	21754.2	1996	4	2.67	0	2.67	0	2.67	0	2.67	0	2.67	2.67	2.67	4822.37	1	2.67	2.67	1	4822.37	0	4822.37	0	0	0	100	1
1178	Brazil	Bahia	Ilheus-Itabuna	IBIRAPITANGA	47222.5	1996	4	2.2	0	2.2	0	2.2	0	2.2	0	2.2	2.2	2.2	3476.69	1	2.2	2.2	1	3476.69	0	3476.69	0	0	0	100	1
1179	Brazil	Bahia	Ilheus-Itabuna	IBIRATAIA	22646.1	1996	4	1.33	0	1.33	0	1.33	0	1.33	0	1.33	1.33	1.33	2251.01	1	1.33	1.33	1	2251.01	0	2251.01	0	0	0	100	1
1180	Brazil	Bahia	Ilheus-Itabuna	ILHEUS	184814	1996	4	134.8	15.13	119.67	0	134.8	15.13	119.67	0	134.8	101.23	101.23	125948	1	101.23	101.23	1.33162	167715	18824.4	148890	0	11.224	0.11224	88.776	0.88776
1181	Brazil	Bahia	Ilheus-Itabuna	IPIAU	28847.2	1996	4	13.53	0	13.53	0	13.53	0	13.53	0	13.53	13.53	13.53	21985.4	1	13.53	13.53	1	21985.4	0	21985.4	0	0	0	100	1
1182	Brazil	Bahia	Ilheus-Itabuna	ITABUNA	44439	1996	4	0	0	0	0	0	0	0	0	0	0	0	0	1	0	0	1	0	0	0	0	-1	-1	-1	-1
1183	Brazil	Bahia	Ilheus-Itabuna	ITACARE	73408.4	1996	4	0.67	0	0.67	0	0.67	0	0.67	0	0.67	0.64	0.64	439.75	1	0.64	0.64	1.04688	460.36	0	460.36	0	0	0	100	1
1184	Brazil	Bahia	Ilheus-Itabuna	ITAGIBA	81558.3	1996	4	176.18	0	176.18	0	176.18	0	176.18	0	176.18	176.18	176.18	203070	1	176.18	176.18	1	203070	0	203070	0	0	0	100	1
1185	Brazil	Bahia	Ilheus-Itabuna	ITAJU DO COLONIA	122407	1996	4	183.86	0	183.86	0	183.86	0	183.86	0	183.86	108.12	108.12	150814	1	108.12	108.12	1.70052	256463	0	256463	0	0	0	100	1
1186	Brazil	Bahia	Ilheus-Itabuna	ITAJUIPE	29619.4	1996	4	16.83	0	16.83	0	16.83	0	16.83	0	16.83	16.83	16.83	20254.6	1	16.83	16.83	1	20254.6	0	20254.6	0	0	0	100	1
1187	Brazil	Bahia	Ilheus-Itabuna	ITAMARI	13247.8	1996	4	1.33	0	1.33	0	1.33	0	1.33	0	1.33	1.33	1.33	1567.72	1	1.33	1.33	1	1567.72	0	1567.72	0	0	0	100	1
1188	Brazil	Bahia	Ilheus-Itabuna	ITAPEBI	97733.3	1996	4	11.76	0	11.76	0	11.76	0	11.76	0	11.76	11.5	11.5	13106.2	1	11.5	11.5	1.02261	13402.5	0	13402.5	0	0	0	100	1
1189	Brazil	Bahia	Ilheus-Itabuna	ITAPE	44586.3	1996	4	40.04	0	40.04	0	40.04	0	40.04	0	40.04	32.8	32.8	52332.2	1	32.8	32.8	1.22073	63883.6	0	63883.6	0	0	0	100	1
1190	Brazil	Bahia	Ilheus-Itabuna	ITAPITANGA	41184.9	1996	4	94.76	0	94.76	0	94.76	0	94.76	0	94.76	91.28	91.28	115710	1	91.28	91.28	1.03812	120121	0	120121	0	0	0	100	1
1191	Brazil	Bahia	Ilheus-Itabuna	JUSSARI	35691.8	1996	4	13.35	0	13.35	0	13.35	0	13.35	0	13.35	13.35	13.35	21014.7	1	13.35	13.35	1	21014.7	0	21014.7	0	0	0	100	1
1192	Brazil	Bahia	Ilheus-Itabuna	MASCOTE	71182.3	1996	4	0	0	0	0	0	0	0	0	0	0	0	0	1	0	0	1	0	0	0	0	-1	-1	-1	-1
1193	Brazil	Bahia	Ilheus-Itabuna	NOVA IBIA	18238.3	1996	4	35.33	0	35.33	0	35.33	0	35.33	0	35.33	35.33	35.33	50792.6	1	35.33	35.33	1	50792.6	0	50792.6	0	0	0	100	1
1194	Brazil	Bahia	Ilheus-Itabuna	PAU BRASIL	61090.2	1996	4	12.92	0	12.92	0	12.92	0	12.92	0	12.92	12.27	12.27	18621.6	1	12.27	12.27	1.05297	19608.1	0	19608.1	0	0	0	100	1
1195	Brazil	Bahia	Ilheus-Itabuna	SANTA CRUZ DA VITORIA	25170.4	1996	4	0	0	0	0	0	0	0	0	0	0	0	0	1	0	0	1	0	0	0	0	-1	-1	-1	-1
1196	Brazil	Bahia	Ilheus-Itabuna	SANTA LUZIA	78599.5	1996	4	20.02	0.19	19.83	0	20.02	0.19	19.83	0	20.02	20.02	20.02	23513.3	1	20.02	20.02	1	23513.3	223.15	23290.2	0	0.9491	0.00949051	99.0509	0.990509
1197	Brazil	Bahia	Ilheus-Itabuna	SAO JOSE DA VITORIA	5336.86	1996	4	0	0	0	0	0	0	0	0	0	0	0	0	1	0	0	1	0	0	0	0	-1	-1	-1	-1
1198	Brazil	Bahia	Ilheus-Itabuna	TEOLANDIA	28833.8	1996	4	0	0	0	0	0	0	0	0	0	0	0	0	1	0	0	1	0	0	0	0	-1	-1	-1	-1
1199	Brazil	Bahia	Ilheus-Itabuna	UBAITABA	22343.6	1996	4	106.77	0	106.77	0	106.77	0	106.77	0	106.77	106.77	106.77	155213	1	106.77	106.77	1	155213	0	155213	0	0	0	100	1
1200	Brazil	Bahia	Ilheus-Itabuna	UBATA	33560.3	1996	4	0	0	0	0	0	0	0	0	0	0	0	0	1	0	0	1	0	0	0	0	-1	-1	-1	-1
1201	Brazil	Bahia	Ilheus-Itabuna	UNA	116117	1996	4	2934.4	477.22	2457.18	0	2934.4	477.22	2457.18	0	2934.4	2658.59	2658.59	2910253	1	2658.59	2658.59	1.10374	3.21217e+06	522394	2.68978e+06	0	16.2629	0.162629	83.7371	0.837371
1202	Brazil	Bahia	Ilheus-Itabuna	URUCUCA	33854.4	1996	4	6.67	2	4.67	0	6.67	2	4.67	0	6.67	6.28	6.28	6625.84	1	6.28	6.28	1.0621	7037.32	2110.14	4927.18	0	29.985	0.29985	70.015	0.70015
1203	Brazil	Bahia	Ilheus-Itabuna	WENCESLAU GUIMARAES	66380.6	1996	4	225.45	0	225.45	0	225.45	0	225.45	0	225.45	225.45	225.45	266797	1	225.45	225.45	1	266797	0	266797	0	0	0	100	1
1204	Brazil	Bahia	Irece	AMERICA DOURADA	74850.5	1996	4	461.18	461.18	0	0	461.18	461.18	0	0	461.18	461.18	461.18	2.97829e+06	1	461.18	461.18	1	2.97829e+06	2.97829e+06	0	0	100	1	0	0
1205	Brazil	Bahia	Irece	BARRA DO MENDES	163756	1996	4	7.49	7.49	0	0	7.49	7.49	0	0	7.49	7.49	7.49	63469.8	1	7.49	7.49	1	63469.8	63469.8	0	0	100	1	0	0
1206	Brazil	Bahia	Irece	BARRO ALTO	38872.2	1996	4	33.47	33.47	0	0	33.47	33.47	0	0	33.47	33.47	33.47	236758	1	33.47	33.47	1	236758	236758	0	0	100	1	0	0
1207	Brazil	Bahia	Irece	CAFARNAUM	107559	1996	4	18.61	18.61	0	0	18.61	18.61	0	0	18.61	18.61	18.61	120070	1	18.61	18.61	1	120070	120070	0	0	100	1	0	0
1208	Brazil	Bahia	Irece	CANARANA	65828.6	1996	4	146.64	146.64	0	0	146.64	146.64	0	0	146.64	146.64	146.64	972073	1	146.64	146.64	1	972073	972073	0	0	100	1	0	0
1209	Brazil	Bahia	Irece	CENTRAL	36796.3	1996	4	21.26	21.26	0	0	21.26	21.26	0	0	21.26	21.26	21.26	197422	1	21.26	21.26	1	197422	197422	0	0	100	1	0	0
1210	Brazil	Bahia	Irece	GENTIO DO OURO	368567	1996	4	106.11	106.11	0	0	106.11	106.11	0	0	106.11	61.38	61.38	456746	1	61.38	61.38	1.72874	789595	789595	0	0	100	1	0	0
1211	Brazil	Bahia	Irece	IBIPEBA	110064	1996	4	351.03	351.03	0	0	351.03	351.03	0	0	351.03	351.03	351.03	2.82579e+06	1	351.03	351.03	1	2.82579e+06	2.82579e+06	0	0	100	1	0	0
1212	Brazil	Bahia	Irece	IBITITA	59707.4	1996	4	53.15	53.15	0	0	53.15	53.15	0	0	53.15	53.15	53.15	377673	1	53.15	53.15	1	377673	377673	0	0	100	1	0	0
1213	Brazil	Bahia	Irece	IRAQUARA	80639.1	1996	4	195.22	60.81	134.41	0	195.22	60.81	134.41	0	195.22	195.22	195.22	1.11973e+06	1	195.22	195.22	1	1.11973e+06	348791	770943	0	31.1495	0.311495	68.8505	0.688505
1214	Brazil	Bahia	Irece	IRECE	33678	1996	4	488.09	488.09	0	0	488.09	488.09	0	0	488.09	488.09	488.09	3.28585e+06	1	488.09	488.09	1	3.28585e+06	3.28585e+06	0	0	100	1	0	0
1215	Brazil	Bahia	Irece	JOAO DOURADO	98690.8	1996	4	510.07	510.07	0	0	510.07	510.07	0	0	510.07	510.07	510.07	3.06476e+06	1	510.07	510.07	1	3.06476e+06	3.06476e+06	0	0	100	1	0	0
1216	Brazil	Bahia	Irece	JUSSARA	79030.2	1996	4	4.42	4.42	0	0	4.42	4.42	0	0	4.42	4.42	4.42	39313.1	1	4.42	4.42	1	39313.1	39313.1	0	0	100	1	0	0
1217	Brazil	Bahia	Irece	LAPAO	64322.8	1996	4	1117.69	1117.69	0	0	1117.69	1117.69	0	0	1117.69	1117.69	1117.69	7.72438e+06	1	1117.69	1117.69	1	7.72438e+06	7.72438e+06	0	0	100	1	0	0
1218	Brazil	Bahia	Irece	MULUNGU DO MORRO	51928.8	1996	4	10.46	9.43	1.03	0	10.46	9.43	1.03	0	10.46	10.46	10.46	70541.4	1	10.46	10.46	1	70541.4	63595.1	6946.23	0	90.153	0.90153	9.847	0.0984704
1219	Brazil	Bahia	Irece	PRESIDENTE DUTRA	28454.7	1996	4	146.08	146.08	0	0	146.08	146.08	0	0	146.08	146.08	146.08	1072936	1	146.08	146.08	1	1072936	1072936	0	0	100	1	0	0
1220	Brazil	Bahia	Irece	SAO GABRIEL	123507	1996	4	110.75	110.75	0	0	110.75	110.75	0	0	110.75	110.75	110.75	742634	1	110.75	110.75	1	742634	742634	0	0	100	1	0	0
1221	Brazil	Bahia	Irece	SOUTO SOARES	109281	1996	4	4.64	4.64	0	0	4.64	4.64	0	0	4.64	4.64	4.64	34859.1	1	4.64	4.64	1	34859.1	34859.1	0	0	100	1	0	0
1222	Brazil	Bahia	Irece	UIBAI	51891.3	1996	4	373.72	355.3	18.42	0	373.72	355.3	18.42	0	373.72	373.72	373.72	3072382	1	373.72	373.72	1	3072382	2.92095e+06	151432	0	95.0712	0.950712	4.9288	0.0492882
1223	Brazil	Bahia	Itaberaba	BAIXA GRANDE	98517.4	1996	4	3.48	0	3.48	0	3.48	0	3.48	0	3.48	3.47	3.47	20891.1	1	3.47	3.47	1.00288	20951.3	0	20951.3	0	0	0	100	1
1224	Brazil	Bahia	Itaberaba	BOA VISTA DO TUPIM	263776	1996	4	64.52	2.88	61.64	0	64.52	2.88	61.64	0	64.52	63.27	63.27	344674	1	63.27	63.27	1.01976	351483	15689.3	335794	0	4.4637	0.0446373	95.5363	0.955363
1225	Brazil	Bahia	Itaberaba	IACU	245367	1996	4	391.12	3.03	388.09	0	391.12	3.03	388.09	0	391.12	338.72	338.72	938183	1	338.72	338.72	1.1547	1.08332e+06	8392.46	1.07493e+06	0	0.7747	0.00774698	99.2253	0.992253
1226	Brazil	Bahia	Itaberaba	IBIQUERA	101798	1996	4	0	0	0	0	0	0	0	0	0	0	0	0	1	0	0	1	0	0	0	0	-1	-1	-1	-1
1227	Brazil	Bahia	Itaberaba	ITABERABA	236781	1996	4	2456.47	8	2448.47	0	2456.47	8	2448.47	0	2456.47	1758.28	1758.28	7.12903e+06	1	1758.28	1758.28	1.39709	9.95987e+06	32436.4	9.92743e+06	0	0.3257	0.00325671	99.6743	0.996743
1228	Brazil	Bahia	Itaberaba	LAJEDINHO	80914.8	1996	4	2.91	1.95	0.96	0	2.91	1.95	0.96	0	2.91	2.71	2.71	14739.4	1	2.71	2.71	1.0738	15827.1	10605.8	5221.33	0	67.0103	0.670103	32.9897	0.329897
1229	Brazil	Bahia	Itaberaba	MACAJUBA	70853.8	1996	4	0	0	0	0	0	0	0	0	0	0	0	0	1	0	0	1	0	0	0	0	-1	-1	-1	-1
1230	Brazil	Bahia	Itaberaba	MAIRI	90566.3	1996	4	62.78	0	62.78	0	62.78	0	62.78	0	62.78	62.77	62.77	323289	1	62.77	62.77	1.00016	323340	0	323340	0	0	0	100	1
1231	Brazil	Bahia	Itaberaba	MUNDO NOVO	150092	1996	4	1.49	0.04	1.45	0	1.49	0.04	1.45	0	1.49	1.47	1.47	8369.14	1	1.47	1.47	1.01361	8483.01	227.73	8255.28	0	2.6846	0.0268456	97.3154	0.973154
1232	Brazil	Bahia	Itaberaba	RUY BARBOSA	213863	1996	4	1.16	0.32	0.84	0	1.16	0.32	0.84	0	1.16	1.13	1.13	6680.92	1	1.13	1.13	1.02655	6858.29	1891.94	4966.35	0	27.5862	0.275862	72.4138	0.724138
1233	Brazil	Bahia	Itaberaba	TAPIRAMUTA	66703.2	1996	4	869.98	56.62	813.36	0	869.98	56.62	813.36	0	869.98	869.98	869.98	4.92795e+06	1	869.98	869.98	1	4.92795e+06	320721	4.60723e+06	0	6.5082	0.065082	93.4918	0.934918
1234	Brazil	Bahia	Itaberaba	VARZEA DA ROCA	55401.4	1996	4	121.15	5.48	115.67	0	121.15	5.48	115.67	0	121.15	121.15	121.15	576473	1	121.15	121.15	1	576473	26075.7	550398	0	4.5233	0.0452332	95.4767	0.954767
1235	Brazil	Bahia	Itapetinga	ENCRUZILHADA	205079	1996	4	197.53	16.81	180.72	0	197.53	16.81	180.72	0	197.53	197.52	197.52	903177	1	197.52	197.52	1.00005	903222	76865.1	826357	0	8.5101	0.085101	91.4899	0.914899
1236	Brazil	Bahia	Itapetinga	ITAMBE	162917	1996	4	76.02	2.14	73.88	0	76.02	2.14	73.88	0	76.02	76.01	76.01	283453	1	76.01	76.01	1.00013	283490	7980.39	275510	0	2.815	0.0281505	97.185	0.97185
1237	Brazil	Bahia	Itapetinga	ITAPETINGA	161307	1996	4	108.01	4	104.01	0	108.01	4	104.01	0	108.01	75.21	75.21	180168	1	75.21	75.21	1.43611	258741	9582.11	249159	0	3.7034	0.0370336	96.2966	0.962966
1238	Brazil	Bahia	Itapetinga	ITARANTIM	179131	1996	4	98.39	0	98.39	0	98.39	0	98.39	0	98.39	84.07	84.07	234306	1	84.07	84.07	1.17033	274216	0	274216	0	0	0	100	1
1239	Brazil	Bahia	Itapetinga	ITORORO	33162.7	1996	4	62.46	0	62.46	0	62.46	0	62.46	0	62.46	62.34	62.34	126360	1	62.34	62.34	1.00192	126603	0	126603	0	0	0	100	1
1240	Brazil	Bahia	Itapetinga	MACARANI	137644	1996	4	44.64	0	44.64	0	44.64	0	44.64	0	44.64	38.01	38.01	126621	1	38.01	38.01	1.17443	148707	0	148707	0	0	0	100	1
1241	Brazil	Bahia	Itapetinga	MAIQUINIQUE	41492.7	1996	4	0	0	0	0	0	0	0	0	0	0	0	0	1	0	0	1	0	0	0	0	-1	-1	-1	-1
1242	Brazil	Bahia	Itapetinga	POTIRAGUA	99246.4	1996	4	800.8	0	800.8	0	800.8	0	800.8	0	800.8	391.75	391.75	840244	1	391.75	391.75	2.04416	1.71759e+06	0	1.71759e+06	0	0	0	100	1
1243	Brazil	Bahia	Itapetinga	RIBEIRAO DO LARGO	122455	1996	4	232.71	2.54	230.17	0	232.71	2.54	230.17	0	232.71	232.71	232.71	977210	1	232.71	232.71	1	977210	10666.1	966544	0	1.0915	0.0109149	98.9085	0.989085
1244	Brazil	Bahia	Jacobina	CAEM	50303	1996	4	87.11	8.22	78.89	0	87.11	8.22	78.89	0	87.11	87.11	87.11	432871	1	87.11	87.11	1	432871	40847.2	392024	0	9.4363	0.0943634	90.5637	0.905637
1245	Brazil	Bahia	Jacobina	CALDEIRAO GRANDE	49360.7	1996	4	0	0	0	0	0	0	0	0	0	0	0	0	1	0	0	1	0	0	0	0	-1	-1	-1	-1
1246	Brazil	Bahia	Jacobina	CAPIM GROSSO	35333.1	1996	4	16.95	1.7	15.25	0	16.95	1.7	15.25	0	16.95	16.95	16.95	89389.3	1	16.95	16.95	1	89389.3	8965.3	80424	0	10.0295	0.100295	89.9705	0.899705
1247	Brazil	Bahia	Jacobina	JACOBINA	233124	1996	4	831.5	831.5	0	0	831.5	831.5	0	0	831.5	831.5	831.5	5161075	1	831.5	831.5	1	5161075	5161075	0	0	100	1	0	0
1248	Brazil	Bahia	Jacobina	MIGUEL CALMON	147074	1996	4	262.28	27.39	234.89	0	262.28	27.39	234.89	0	262.28	262.28	262.28	1.53802e+06	1	262.28	262.28	1	1.53802e+06	160616	1.37741e+06	0	10.443	0.10443	89.557	0.89557
1249	Brazil	Bahia	Jacobina	MIRANGABA	195344	1996	4	1207.06	552.56	654.5	0	1207.06	552.56	654.5	0	1207.06	1207.06	1207.06	7.44341e+06	1	1207.06	1207.06	1	7.44341e+06	3.40739e+06	4.03601e+06	0	45.7773	0.457773	54.2227	0.542227
1250	Brazil	Bahia	Jacobina	MORRO DO CHAPEU	551364	1996	4	453.47	453.47	0	0	453.47	453.47	0	0	453.47	453.44	453.44	2.56596e+06	1	453.44	453.44	1.00007	2.56613e+06	2.56613e+06	0	0	100	1	0	0
1251	Brazil	Bahia	Jacobina	OUROLANDIA	128012	1996	4	149.98	120.13	29.85	0	149.98	120.13	29.85	0	149.98	149.98	149.98	1.08074e+06	1	149.98	149.98	1	1.08074e+06	865642	215095	0	80.0973	0.800973	19.9027	0.199027
1252	Brazil	Bahia	Jacobina	PIRITIBA	99809.7	1996	4	38.71	6.6	32.11	0	38.71	6.6	32.11	0	38.71	38.71	38.71	221507	1	38.71	38.71	1	221507	37766.6	183740	0	17.0499	0.170499	82.9501	0.829501
1253	Brazil	Bahia	Jacobina	PONTO NOVO	46659.2	1996	4	107.41	10.65	96.76	0	107.41	10.65	96.76	0	107.41	107.41	107.41	616129	1	107.41	107.41	1	616129	61090.9	555038	0	9.9153	0.0991528	90.0847	0.900847
1254	Brazil	Bahia	Jacobina	QUIXABEIRA	36998.6	1996	4	60.13	6.01	54.12	0	60.13	6.01	54.12	0	60.13	60.13	60.13	334886	1	60.13	60.13	1	334886	33471.9	301415	0	9.995	0.0999501	90.005	0.90005
1255	Brazil	Bahia	Jacobina	SAO JOSE DO JACUIPE	36742.2	1996	4	19.47	1.78	17.69	0	19.47	1.78	17.69	0	19.47	19.47	19.47	92787.4	1	19.47	19.47	1	92787.4	8482.87	84304.5	0	9.1423	0.0914227	90.8577	0.908577
1256	Brazil	Bahia	Jacobina	SAUDE	50265.5	1996	4	250.4	0	250.4	0	250.4	0	250.4	0	250.4	250.4	250.4	993725	1	250.4	250.4	1	993725	0	993725	0	0	0	100	1
1257	Brazil	Bahia	Jacobina	SERROLANDIA	37481.6	1996	4	25.8	1.81	23.99	0	25.8	1.81	23.99	0	25.8	25.8	25.8	135199	1	25.8	25.8	1	135199	9484.86	125714	0	7.0155	0.070155	92.9845	0.929845
1258	Brazil	Bahia	Jacobina	VARZEA DO POCO	22195.2	1996	4	0.87	0	0.87	0	0.87	0	0.87	0	0.87	0.87	0.87	5241.4	1	0.87	0.87	1	5241.4	0	5241.4	0	0	0	100	1
1259	Brazil	Bahia	Jacobina	VARZEA NOVA	117029	1996	4	109.72	109.72	0	0	109.72	109.72	0	0	109.72	109.72	109.72	758867	1	109.72	109.72	1	758867	758867	0	0	100	1	0	0
1260	Brazil	Bahia	Jequie	AIQUARA	19732.6	1996	4	0	0	0	0	0	0	0	0	0	0	0	0	1	0	0	1	0	0	0	0	-1	-1	-1	-1
1261	Brazil	Bahia	Jequie	AMARGOSA	43901.4	1996	4	30.7	0	30.7	0	30.7	0	30.7	0	30.7	30.7	30.7	43116	1	30.7	30.7	1	43116	0	43116	0	0	0	100	1
1262	Brazil	Bahia	Jequie	APUAREMA	15055.8	1996	4	9.34	0	9.34	0	9.34	0	9.34	0	9.34	9.34	9.34	11460.6	1	9.34	9.34	1	11460.6	0	11460.6	0	0	0	100	1
1263	Brazil	Bahia	Jequie	BREJOES	48222.9	1996	4	37.9	3.29	34.61	0	37.9	3.29	34.61	0	37.9	37.9	37.9	91773.5	1	37.9	37.9	1	91773.5	7966.62	83806.9	0	8.6807	0.0868074	91.3193	0.913193
1264	Brazil	Bahia	Jequie	CRAVOLANDIA	16060.7	1996	4	140.43	0	140.43	0	140.43	0	140.43	0	140.43	140.43	140.43	183724	1	140.43	140.43	1	183724	0	183724	0	0	0	100	1
1265	Brazil	Bahia	Jequie	IRAJUBA	38319	1996	4	0	0	0	0	0	0	0	0	0	0	0	0	1	0	0	1	0	0	0	0	-1	-1	-1	-1
1266	Brazil	Bahia	Jequie	IRAMAIA	195049	1996	4	259.71	59.9	199.81	0	259.71	59.9	199.81	0	259.71	227.49	227.49	956445	1	227.49	227.49	1.14163	1.09191e+06	251840	840069	0	23.0642	0.230642	76.9358	0.769358
1267	Brazil	Bahia	Jequie	ITAGI	30281.3	1996	4	67.4	1.35	66.05	0	67.4	1.35	66.05	0	67.4	67.4	67.4	107605	1	67.4	67.4	1	107605	2155.29	105449	0	2.003	0.0200297	97.997	0.97997
1268	Brazil	Bahia	Jequie	ITAQUARA	29730.5	1996	4	557.45	5.07	552.38	0	557.45	5.07	552.38	0	557.45	546.98	546.98	989305	1	546.98	546.98	1.01914	1.00824e+06	9169.95	999072	0	0.9095	0.00909499	99.0905	0.990905
1269	Brazil	Bahia	Jequie	ITIRUCU	30429.3	1996	4	965.79	73.75	892.04	0	965.79	73.75	892.04	0	965.79	890.96	890.96	2189271	1	890.96	890.96	1.08399	2.37314e+06	181219	2.19192e+06	0	7.6362	0.0763624	92.3638	0.923638
1270	Brazil	Bahia	Jequie	JAGUAQUARA	96420.4	1996	4	2126.14	28.77	2097.37	0	2126.14	28.77	2097.37	0	2126.14	1924.35	1924.35	3982046	1	1924.35	1924.35	1.10486	4.39961e+06	59533.6	4.34008e+06	0	1.3532	0.0135316	98.6468	0.986468
1271	Brazil	Bahia	Jequie	JEQUIE	304573	1996	4	1522.78	10.62	1512.16	0	1522.78	10.62	1512.16	0	1522.78	1364.1	1364.1	2498918	1	1364.1	1364.1	1.11633	2.78961e+06	19455	2.77015e+06	0	0.6974	0.00697409	99.3026	0.993026
1272	Brazil	Bahia	Jequie	JIQUIRICA	23698.9	1996	4	9.56	0	9.56	0	9.56	0	9.56	0	9.56	9.56	9.56	10829	1	9.56	9.56	1	10829	0	10829	0	0	0	100	1
1273	Brazil	Bahia	Jequie	JITAUNA	33242.4	1996	4	106.64	0	106.64	0	106.64	0	106.64	0	106.64	106.64	106.64	157231	1	106.64	106.64	1	157231	0	157231	0	0	0	100	1
1274	Brazil	Bahia	Jequie	LAFAIETE COUTINHO	35385.7	1996	4	35.84	1.58	34.26	0	35.84	1.58	34.26	0	35.84	35.33	35.33	66115.9	1	35.33	35.33	1.01444	67070.3	2956.78	64113.5	0	4.4085	0.0440848	95.5915	0.955915
1275	Brazil	Bahia	Jequie	LAJE	49965.3	1996	4	3.83	0	3.83	0	3.83	0	3.83	0	3.83	3.82	3.82	4984.2	1	3.82	3.82	1.00262	4997.25	0	4997.25	0	0	0	100	1
1276	Brazil	Bahia	Jequie	LAJEDO DO TABOCAL	42477.7	1996	4	286.87	24.51	262.36	0	286.87	24.51	262.36	0	286.87	286.87	286.87	698136	1	286.87	286.87	1	698136	59648.3	638488	0	8.5439	0.0854394	91.4561	0.914561
1277	Brazil	Bahia	Jequie	MARACAS	244546	1996	4	2243.15	63.93	2179.22	0	2243.15	63.93	2179.22	0	2243.15	1627.49	1627.49	5.60945e+06	1	1627.49	1627.49	1.37829	7.73144e+06	220347	7.51109e+06	0	2.85	0.0285001	97.15	0.9715
1278	Brazil	Bahia	Jequie	MARCIONILIO SOUZA	116805	1996	4	120.55	0	120.55	0	120.55	0	120.55	0	120.55	120.55	120.55	465502	1	120.55	120.55	1	465502	0	465502	0	0	0	100	1
1279	Brazil	Bahia	Jequie	MILAGRES	31020.8	1996	4	0	0	0	0	0	0	0	0	0	0	0	0	1	0	0	1	0	0	0	0	-1	-1	-1	-1
1280	Brazil	Bahia	Jequie	MUTUIPE	27293.7	1996	4	60.35	0	60.35	0	60.35	0	60.35	0	60.35	60.35	60.35	68083.4	1	60.35	60.35	1	68083.4	0	68083.4	0	0	0	100	1
1281	Brazil	Bahia	Jequie	NOVA ITARANA	45678.1	1996	4	6.98	2.2	4.78	0	6.98	2.2	4.78	0	6.98	6.98	6.98	19540.2	1	6.98	6.98	1	19540.2	6158.8	13381.4	0	31.5186	0.315186	68.4814	0.684814
1282	Brazil	Bahia	Jequie	PLANALTINO	94109.6	1996	4	103.25	8.87	94.38	0	103.25	8.87	94.38	0	103.25	103.25	103.25	278179	1	103.25	103.25	1	278179	23897.8	254281	0	8.5908	0.085908	91.4092	0.914092
1283	Brazil	Bahia	Jequie	SANTA INES	35936.8	1996	4	33.62	0	33.62	0	33.62	0	33.62	0	33.62	33.62	33.62	72540.8	1	33.62	33.62	1	72540.8	0	72540.8	0	0	0	100	1
1284	Brazil	Bahia	Jequie	SAO MIGUEL DAS MATAS	20771.8	1996	4	0	0	0	0	0	0	0	0	0	0	0	0	1	0	0	1	0	0	0	0	-1	-1	-1	-1
1285	Brazil	Bahia	Jequie	UBAIRA	76375	1996	4	619.9	0	619.9	0	619.9	0	619.9	0	619.9	619.9	619.9	1.09655e+06	1	619.9	619.9	1	1.09655e+06	0	1.09655e+06	0	0	0	100	1
1286	Brazil	Bahia	Jeremoabo	CORONEL JOAO SA	85114.3	1996	4	283.43	10.52	272.91	0	283.43	10.52	272.91	0	283.43	283.43	283.43	1391711	1	283.43	283.43	1	1391711	51655.8	1.34006e+06	0	3.7117	0.0371167	96.2883	0.962883
1287	Brazil	Bahia	Jeremoabo	JEREMOABO	478680	1996	4	907.33	411.23	496.1	0	907.33	411.23	496.1	0	907.33	653.97	653.97	3759265	1	653.97	653.97	1.38742	5.21567e+06	2.3639e+06	2.85177e+06	0	45.3231	0.453231	54.6769	0.546769
1288	Brazil	Bahia	Jeremoabo	PEDRO ALEXANDRE	114582	1996	4	0	0	0	0	0	0	0	0	0	0	0	0	1	0	0	1	0	0	0	0	-1	-1	-1	-1
1289	Brazil	Bahia	Jeremoabo	SANTA BRIGIDA	85342.7	1996	4	0	0	0	0	0	0	0	0	0	0	0	0	1	0	0	1	0	0	0	0	-1	-1	-1	-1
1290	Brazil	Bahia	Jeremoabo	SITIO DO QUINTO	67569.3	1996	4	0	0	0	0	0	0	0	0	0	0	0	0	1	0	0	1	0	0	0	0	-1	-1	-1	-1
1291	Brazil	Bahia	Juazeiro	CAMPO ALEGRE DE LOURDES	276645	1996	4	0	0	0	0	0	0	0	0	0	0	0	0	1	0	0	1	0	0	0	0	-1	-1	-1	-1
1292	Brazil	Bahia	Juazeiro	CASA NOVA	970703	1996	4	4364.62	135.75	4228.87	0	4364.62	135.75	4228.87	0	4364.62	3152.98	3152.98	26091086	1	3152.98	3152.98	1.38428	3.61175e+07	1.12334e+06	3.49941e+07	0	3.1102	0.0311024	96.8898	0.968898
1293	Brazil	Bahia	Juazeiro	CURACA	648059	1996	4	4734.27	0	4734.27	0	4734.27	0	4734.27	0	4734.27	2298.76	2298.76	21094492	1	2298.76	2298.76	2.05949	4.34439e+07	0	4.34439e+07	0	0	0	100	1
1294	Brazil	Bahia	Juazeiro	JUAZEIRO	640645	1996	4	39325.1	12749.9	26575.2	0	39325.1	12749.9	26575.2	0	39325.1	22052.7	22052.7	171823168	1	22052.7	22052.7	1.78323	3.06401e+08	9.93404e+07	2.0706e+08	0	32.4218	0.324218	67.5782	0.675782
1295	Brazil	Bahia	Juazeiro	PILAO ARCADO	1.17539e+06	1996	4	4.67	0.33	4.34	0	4.67	0.33	4.34	0	4.67	4.62	4.62	48846.1	1	4.62	4.62	1.01082	49374.8	3489.01	45885.8	0	7.0664	0.0706638	92.9336	0.929336
1296	Brazil	Bahia	Juazeiro	REMANSO	470495	1996	4	425.76	19.51	406.25	0	425.76	19.51	406.25	0	425.76	388.46	388.46	3.63648e+06	1	388.46	388.46	1.09602	3.98565e+06	182638	3.80301e+06	0	4.5824	0.0458239	95.4176	0.954176
1297	Brazil	Bahia	Juazeiro	SENTO SE	1.26227e+06	1996	4	4420.66	442.07	3978.59	0	4420.66	442.07	3978.59	0	4420.66	2136.47	2136.47	18684548	1	2136.47	2136.47	2.06914	3.8661e+07	3.86613e+06	3.47949e+07	0	10.0001	0.100001	89.9999	0.899999
1298	Brazil	Bahia	Juazeiro	SOBRADINHO	132966	1996	4	550.22	0	550.22	0	550.22	0	550.22	0	550.22	526.24	526.24	3.50672e+06	1	526.24	526.24	1.04557	3.66652e+06	0	3.66652e+06	0	0	0	100	1
1299	Brazil	Bahia	Livramento do Brumado	DOM BASILIO	65380.1	1996	4	1780.49	89.66	1690.83	0	1780.49	89.66	1690.83	0	1780.49	1744.35	1744.35	12273119	1	1744.35	1744.35	1.02072	1.25274e+07	630841	1.18966e+07	0	5.0357	0.0503569	94.9643	0.949643
1300	Brazil	Bahia	Livramento do Brumado	ERICO CARDOSO	70410.9	1996	4	2133.93	0	2133.93	0	2133.93	0	2133.93	0	2133.93	1752.17	1752.17	10509065	1	1752.17	1752.17	1.21788	1.27988e+07	0	1.27988e+07	0	0	0	100	1
1301	Brazil	Bahia	Livramento do Brumado	LIVRAMENTO DO BRUMADO	227593	1996	4	8093.76	309.2	7784.56	0	8093.76	309.2	7784.56	0	8093.76	7388.86	7388.86	49942552	1	7388.86	7388.86	1.0954	5.47071e+07	2.08993e+06	5.26172e+07	0	3.8202	0.0382023	96.1798	0.961798
1302	Brazil	Bahia	Livramento do Brumado	PARAMIRIM	112168	1996	4	1255.44	0	1255.44	0	1255.44	0	1255.44	0	1255.44	1242.58	1242.58	8247500	1	1242.58	1242.58	1.01035	8.33286e+06	0	8.33286e+06	0	0	0	100	1
1303	Brazil	Bahia	Livramento do Brumado	RIO DO PIRES	89387	1996	4	1028.86	0	1028.86	0	1028.86	0	1028.86	0	1028.86	943.89	943.89	6256311	1	943.89	943.89	1.09002	6.81951e+06	0	6.81951e+06	0	0	0	100	1
1304	Brazil	Bahia	Paulo Alfonso	ABARE	169664	1996	4	2903.2	67.08	2836.12	0	2903.2	67.08	2836.12	0	2903.2	1743.28	1743.28	16921218	1	1743.28	1743.28	1.66537	2.818e+07	651115	2.75289e+07	0	2.3106	0.0231055	97.6894	0.976894
1305	Brazil	Bahia	Paulo Alfonso	CHORROCHO	265749	1996	4	667.79	0	667.79	0	667.79	0	667.79	0	667.79	459.84	459.84	3.70917e+06	1	459.84	459.84	1.45222	5.38654e+06	0	5.38654e+06	0	0	0	100	1
1306	Brazil	Bahia	Paulo Alfonso	GLORIA	128458	1996	4	1641.21	682.84	958.37	0	1641.21	682.84	958.37	0	1641.21	871.87	871.87	7079489	1	871.87	871.87	1.8824	1.33264e+07	5.54459e+06	7.78186e+06	0	41.6059	0.416059	58.3941	0.583941
1307	Brazil	Bahia	Paulo Alfonso	MACURURE	229037	1996	4	0	0	0	0	0	0	0	0	0	0	0	0	1	0	0	1	0	0	0	0	-1	-1	-1	-1
1308	Brazil	Bahia	Paulo Alfonso	PAULO AFONSO	169840	1996	4	469.3	263.6	205.7	0	469.3	263.6	205.7	0	469.3	329.13	329.13	2.30292e+06	1	329.13	329.13	1.42588	3.28369e+06	1.84441e+06	1.43928e+06	0	56.1688	0.561688	43.8312	0.438312
1309	Brazil	Bahia	Paulo Alfonso	RODELAS	258035	1996	4	1789.39	173.95	1615.44	0	1789.39	173.95	1615.44	0	1789.39	1364.29	1364.29	13707987	1	1364.29	1364.29	1.31159	1.79793e+07	1.7478e+06	1.62315e+07	0	9.7212	0.0972119	90.2788	0.902788
1310	Brazil	Bahia	Porto Seguro	ALCOBACA	151407	1996	4	854.16	325.26	528.9	0	854.16	325.26	528.9	0	854.16	854.15	854.15	1.23723e+06	1	854.15	854.15	1.00001	1.23724e+06	471136	766107	0	38.0795	0.380795	61.9205	0.619205
1311	Brazil	Bahia	Porto Seguro	CARAVELAS	236709	1996	4	2365.78	1094.53	1271.25	0	2365.78	1094.53	1271.25	0	2365.78	2121.49	2121.49	4970286	1	2121.49	2121.49	1.11515	5.54262e+06	2.5643e+06	2.97832e+06	0	46.2651	0.462651	53.7349	0.537349
1312	Brazil	Bahia	Porto Seguro	EUNAPOLIS	119792	1996	4	772.77	0	772.77	0	772.77	0	772.77	0	772.77	724.73	724.73	920777	1	724.73	724.73	1.06629	981812	0	981812	0	0	0	100	1
1313	Brazil	Bahia	Porto Seguro	GUARATINGA	233189	1996	4	246.06	0	246.06	0	246.06	0	246.06	0	246.06	237.31	236.8	450714	1	237.31	236.8	1.03687	467333	0	467333	0	0	0	100	1
1314	Brazil	Bahia	Porto Seguro	IBIRAPUA	78866.9	1996	4	218.46	18.29	200.17	0	218.46	18.29	200.17	0	218.46	218.46	218.46	482345	1	218.46	218.46	1	482345	40383.1	441962	0	8.3722	0.0837224	91.6278	0.916278
1315	Brazil	Bahia	Porto Seguro	ITABELA	85662.2	1996	4	1213.93	95.81	1118.12	0	1213.93	95.81	1118.12	0	1213.93	1137.38	1137.38	1.62571e+06	1	1137.38	1137.38	1.0673	1.73512e+06	136945	1.59818e+06	0	7.8925	0.0789255	92.1075	0.921075
1316	Brazil	Bahia	Porto Seguro	ITAGIMIRIM	81754.6	1996	4	0	0	0	0	0	0	0	0	0	0	0	0	1	0	0	1	0	0	0	0	-1	-1	-1	-1
1317	Brazil	Bahia	Porto Seguro	ITAMARAJU	238318	1996	4	229.22	0	229.22	0	229.22	0	229.22	0	229.22	228.74	228.74	430319	1	228.74	228.74	1.0021	431222	0	431222	0	0	0	100	1
1318	Brazil	Bahia	Porto Seguro	ITANHEM	144922	1996	4	14.41	0	14.41	0	14.41	0	14.41	0	14.41	14.41	14.41	40409.1	1	14.41	14.41	1	40409.1	0	40409.1	0	0	0	100	1
1319	Brazil	Bahia	Porto Seguro	JUCURUCU	144146	1996	4	0.67	0	0.67	0	0.67	0	0.67	0	0.67	0.66	0.66	1667.97	1	0.66	0.66	1.01515	1693.24	0	1693.24	0	0	0	100	1
1320	Brazil	Bahia	Porto Seguro	LAJEDAO	61400.5	1996	4	105.39	10.85	94.54	0	105.39	10.85	94.54	0	105.39	105.39	105.39	287984	1	105.39	105.39	1	287984	29648.2	258336	0	10.2951	0.102951	89.7049	0.897049
1321	Brazil	Bahia	Porto Seguro	MEDEIROS NETO	124769	1996	4	5.93	0.35	5.58	0	5.93	0.35	5.58	0	5.93	5.87	5.85	16923.3	1	5.87	5.85	1.01022	17096.2	1009.05	16087.2	0	5.9022	0.0590219	94.0978	0.940978
1322	Brazil	Bahia	Porto Seguro	MUCURI	178555	1996	4	1274.9	462.49	812.41	0	1274.9	462.49	812.41	0	1274.9	1276.21	1272.66	2.69674e+06	1	1276.21	1272.66	1	2.69674e+06	978286	1.71846e+06	0	36.2766	0.362766	63.7234	0.637234
1323	Brazil	Bahia	Porto Seguro	NOVA VICOSA	132630	1996	4	1352.07	706.39	645.68	0	1352.07	706.39	645.68	0	1352.07	1142.17	1142.17	1.86954e+06	1	1142.17	1142.17	1.18377	2.21312e+06	1.15624e+06	1.05687e+06	0	52.2451	0.522451	47.7549	0.477549
1324	Brazil	Bahia	Porto Seguro	PORTO SEGURO	242155	1996	4	2353.02	712.35	1640.67	0	2353.02	712.35	1640.67	0	2353.02	2091.35	2091.35	2.38233e+06	1	2091.35	2091.35	1.12512	2.6804e+06	811462	1.86894e+06	0	30.2739	0.302739	69.7261	0.697261
1325	Brazil	Bahia	Porto Seguro	PRADO	167494	1996	4	39.96	24.83	15.13	0	39.96	24.83	15.13	0	39.96	39.94	39.94	53572.6	1	39.94	39.94	1.0005	53599.4	33305.2	20294.3	0	62.1371	0.621371	37.8629	0.378629
1326	Brazil	Bahia	Porto Seguro	SANTA CRUZ CABRALIA	155623	1996	4	206.87	97.13	109.74	0	206.87	97.13	109.74	0	206.87	203.72	203.72	249790	1	203.72	203.72	1.01546	253652	119095	134557	0	46.9522	0.469522	53.0478	0.530478
1327	Brazil	Bahia	Porto Seguro	TEIXEIRA DE FREITAS	115649	1996	4	1862.86	339.33	1523.53	0	1862.86	339.33	1523.53	0	1862.86	1444.55	1444.55	2.78289e+06	1	1444.55	1444.55	1.28958	3.58875e+06	653710	2.93504e+06	0	18.2155	0.182155	81.7845	0.817845
1328	Brazil	Bahia	Porto Seguro	VEREDA	82607.3	1996	4	306.97	4.26	302.71	0	306.97	4.26	302.71	0	306.97	289.71	289.71	566112	1	289.71	289.71	1.05958	599839	8324.31	591514	0	1.3878	0.0138776	98.6122	0.986122
1329	Brazil	Bahia	Ribeira do Pombal	ADUSTINA	63320.8	1996	4	2.22	0.28	1.94	0	2.22	0.28	1.94	0	2.22	2.22	2.22	10645.3	1	2.22	2.22	1	10645.3	1342.65	9302.64	0	12.6126	0.126126	87.3874	0.873874
1330	Brazil	Bahia	Ribeira do Pombal	ANTAS	28488.7	1996	4	1.41	0.7	0.71	0	1.41	0.7	0.71	0	1.41	1.41	1.41	7005.95	1	1.41	1.41	1	7005.95	3478.13	3527.82	0	49.6454	0.496454	50.3546	0.503546
1331	Brazil	Bahia	Ribeira do Pombal	BANZAE	21201.2	1996	4	0	0	0	0	0	0	0	0	0	0	0	0	1	0	0	1	0	0	0	0	-1	-1	-1	-1
1332	Brazil	Bahia	Ribeira do Pombal	CICERO DANTAS	72799.5	1996	4	24.12	12.06	12.06	0	24.12	12.06	12.06	0	24.12	24.11	24.11	96864.7	1	24.11	24.11	1.00041	96904.9	48452.5	48452.5	0	50	0.5	50	0.5
1333	Brazil	Bahia	Ribeira do Pombal	CIPO	16549.1	1996	4	99.69	49.84	49.85	0	99.69	49.84	49.85	0	99.69	99.69	99.69	339216	1	99.69	99.69	1	339216	169591	169625	0	49.995	0.49995	50.005	0.50005
1334	Brazil	Bahia	Ribeira do Pombal	FATIMA	29837.1	1996	4	17.76	8.85	8.91	0	17.76	8.85	8.91	0	17.76	17.75	17.75	70888.1	1	17.75	17.75	1.00056	70928	35344.2	35583.8	0	49.8311	0.498311	50.1689	0.501689
1335	Brazil	Bahia	Ribeira do Pombal	HELIOPOLIS	31343.9	1996	4	1.82	0.91	0.91	0	1.82	0.91	0.91	0	1.82	1.82	1.82	8748.01	1	1.82	1.82	1	8748.01	4374.01	4374.01	0	50	0.5	50	0.5
1336	Brazil	Bahia	Ribeira do Pombal	ITAPICURU	155412	1996	4	474.75	237.4	237.35	0	474.75	237.4	237.35	0	474.75	471.97	471.97	1.46546e+06	1	471.97	471.97	1.00589	1.47409e+06	737123	736968	0	50.0053	0.500053	49.9947	0.499947
1337	Brazil	Bahia	Ribeira do Pombal	NOVA SOURE	67083.1	1996	4	70.68	30.39	40.29	0	70.68	30.39	40.29	0	70.68	70.68	70.68	257236	1	70.68	70.68	1	257236	110603	146633	0	42.9966	0.429966	57.0034	0.570034
1338	Brazil	Bahia	Ribeira do Pombal	NOVO TRIUNFO	14063.7	1996	4	20.19	10.1	10.09	0	20.19	10.1	10.09	0	20.19	20.19	20.19	86688.2	1	20.19	20.19	1	86688.2	43365.6	43322.6	0	50.0248	0.500248	49.9752	0.499752
1339	Brazil	Bahia	Ribeira do Pombal	OLINDINA	53918	1996	4	64.41	64.41	0	0	64.41	64.41	0	0	64.41	64.41	64.41	174239	1	64.41	64.41	1	174239	174239	0	0	100	1	0	0
1340	Brazil	Bahia	Ribeira do Pombal	PARIPIRANGA	43662.2	1996	4	6.35	0.64	5.71	0	6.35	0.64	5.71	0	6.35	6.35	6.35	20115.7	1	6.35	6.35	1	20115.7	2027.41	18088.3	0	10.0787	0.100787	89.9213	0.899213
1341	Brazil	Bahia	Ribeira do Pombal	RIBEIRA DO AMPARO	65818.4	1996	4	209.6	104.8	104.8	0	209.6	104.8	104.8	0	209.6	209.6	209.6	811756	1	209.6	209.6	1	811756	405878	405878	0	50	0.5	50	0.5
1342	Brazil	Bahia	Ribeira do Pombal	RIBEIRA DO POMBAL	81619.1	1996	4	87.81	43.91	43.9	0	87.81	43.91	43.9	0	87.81	87.81	87.81	402565	1	87.81	87.81	1	402565	201305	201260	0	50.0057	0.500057	49.9943	0.499943
1343	Brazil	Bahia	Salvador	CAMACARI	76098.6	1996	4	26.55	4.03	22.52	0	26.55	4.03	22.52	0	26.55	26.55	26.55	36339.6	1	26.55	26.55	1	36339.6	5515.95	30823.6	0	15.1789	0.151789	84.8211	0.848211
1344	Brazil	Bahia	Salvador	CANDEIAS	26492.7	1996	4	40.61	15.03	25.58	0	40.61	15.03	25.58	0	40.61	40.61	40.61	45561.5	1	40.61	40.61	1	45561.5	16862.6	28698.9	0	37.0106	0.370106	62.9894	0.629894
1345	Brazil	Bahia	Salvador	DIAS D'AVILA	20872.3	1996	4	16.43	8.21	8.22	0	16.43	8.21	8.22	0	16.43	16.43	16.43	29572.4	1	16.43	16.43	1	29572.4	14777.2	14795.2	0	49.9696	0.499696	50.0304	0.500304
1346	Brazil	Bahia	Salvador	ITAPARICA	11666.2	1996	4	0	0	0	0	0	0	0	0	0	0	0	0	1	0	0	1	0	0	0	0	-1	-1	-1	-1
1347	Brazil	Bahia	Salvador	LAURO DE FREITAS	6068.04	1996	4	2.5	0.25	2.25	0	2.5	0.25	2.25	0	2.5	2.5	2.5	2626.62	1	2.5	2.5	1	2626.62	262.66	2363.96	0	10	0.1	90	0.9
1348	Brazil	Bahia	Salvador	MADRE DE DEUS	1155.2	1996	4	0	0	0	0	0	0	0	0	0	0	0	0	1	0	0	1	0	0	0	0	-1	-1	-1	-1
1349	Brazil	Bahia	Salvador	SALVADOR	70601.3	1996	4	52.44	5.24	47.2	0	52.44	5.24	47.2	0	52.44	52.44	52.44	58273.2	1	52.44	52.44	1	58273.2	5822.88	52450.4	0	9.9924	0.0999237	90.0076	0.900076
1350	Brazil	Bahia	Salvador	SAO FRANCISCO DO CONDE	26641.5	1996	4	1.33	0.11	1.22	0	1.33	0.11	1.22	0	1.33	1.33	1.33	1546.58	1	1.33	1.33	1	1546.58	127.91	1418.67	0	8.2707	0.0827068	91.7293	0.917293
1351	Brazil	Bahia	Salvador	SIMOES FILHO	19262.7	1996	4	20.02	5.01	15.01	0	20.02	5.01	15.01	0	20.02	20.02	20.02	23044.5	1	20.02	20.02	1	23044.5	5766.89	17277.7	0	25.025	0.25025	74.975	0.74975
1352	Brazil	Bahia	Salvador	VERA CRUZ	47468.6	1996	4	12.68	1.27	11.41	0	12.68	1.27	11.41	0	12.68	12.68	12.68	11703	1	12.68	12.68	1	11703	1172.15	10530.9	0	10.0158	0.100158	89.9842	0.899842
1353	Brazil	Bahia	Santa Maria da Vitoria	CANAPOLIS	46361.5	1996	4	848.86	848.86	0	0	848.86	848.86	0	0	848.86	761.55	761.55	5.66749e+06	1	761.55	761.55	1.11465	6.31725e+06	6.31725e+06	0	0	100	1	0	0
1354	Brazil	Bahia	Santa Maria da Vitoria	COCOS	1.01211e+06	1996	4	1666.85	1666.85	0	0	1666.85	1666.85	0	0	1666.85	1579.29	1575.08	9366875	1	1579.29	1575.08	1.05544	9.8862e+06	9.8862e+06	0	0	100	1	0	0
1355	Brazil	Bahia	Santa Maria da Vitoria	CORIBE	269245	1996	4	1407.23	1407.23	0	0	1407.23	1407.23	0	0	1407.23	610.3	610.3	3.82545e+06	1	610.3	610.3	2.3058	8.82072e+06	8.82072e+06	0	0	100	1	0	0
1356	Brazil	Bahia	Santa Maria da Vitoria	CORRENTINA	1.16078e+06	1996	4	12215.6	12215.6	0	0	12215.6	12215.6	0	0	12215.6	9294.92	9293.41	52650716	1	9294.92	9293.41	1.31423	6.9195e+07	6.9195e+07	0	0	100	1	0	0
1357	Brazil	Bahia	Santa Maria da Vitoria	JABORANDI	1.00964e+06	1996	4	2699.54	2699.54	0	0	2699.54	2699.54	0	0	2699.54	1233.81	1233.81	8144462	1	1233.81	1233.81	2.18797	1.78198e+07	1.78198e+07	0	0	100	1	0	0
1358	Brazil	Bahia	Santa Maria da Vitoria	SANTA MARIA DA VITORIA	190068	1996	4	1428.04	1428.04	0	0	1428.04	1428.04	0	0	1428.04	638.31	638.31	4486380	1	638.31	638.31	2.23722	1.0037e+07	1.0037e+07	0	0	100	1	0	0
1359	Brazil	Bahia	Santa Maria da Vitoria	SANTANA	200655	1996	4	3927.25	2906.83	1020.42	0	3927.25	2906.83	1020.42	0	3927.25	2879.73	2879.73	21855634	1	2879.73	2879.73	1.36376	2.98058e+07	2.20613e+07	7.74445e+06	0	74.0169	0.740169	25.9831	0.259831
1360	Brazil	Bahia	Santa Maria da Vitoria	SAO FELIX DO CORIBE	84879.8	1996	4	3343.08	3343.08	0	0	3343.08	3343.08	0	0	3343.08	2017.75	2017.75	14337760	1	2017.75	2017.75	1.65684	2.37553e+07	2.37553e+07	0	0	100	1	0	0
1361	Brazil	Bahia	Santa Maria da Vitoria	SERRA DOURADA	144572	1996	4	241.01	241.01	0	0	241.01	241.01	0	0	241.01	237.62	237.62	1.89337e+06	1	237.62	237.62	1.01427	1.92038e+06	1.92038e+06	0	0	100	1	0	0
1362	Brazil	Bahia	Santo Antonio de Jesus	ARATUIPE	17605.7	1996	4	0	0	0	0	0	0	0	0	0	0	0	0	1	0	0	1	0	0	0	0	-1	-1	-1	-1
1363	Brazil	Bahia	Santo Antonio de Jesus	CABACEIRAS DO PARAGUACU	21389.9	1996	4	47.75	0	47.75	0	47.75	0	47.75	0	47.75	47.75	47.75	84867.6	1	47.75	47.75	1	84867.6	0	84867.6	0	0	0	100	1
1364	Brazil	Bahia	Santo Antonio de Jesus	CACHOEIRA	39883.7	1996	4	20.93	1.64	19.29	0	20.93	1.64	19.29	0	20.93	20.93	20.93	36611.4	1	20.93	20.93	1	36611.4	2868.74	33742.7	0	7.8356	0.0783564	92.1644	0.921644
1365	Brazil	Bahia	Santo Antonio de Jesus	CASTRO ALVES	76722.4	1996	4	55.2	0	55.2	0	55.2	0	55.2	0	55.2	55.19	55.19	101453	1	55.19	55.19	1.00018	101471	0	101471	0	0	0	100	1
1366	Brazil	Bahia	Santo Antonio de Jesus	CONCEICAO DO ALMEIDA	29027	1996	4	14.53	0	14.53	0	14.53	0	14.53	0	14.53	14.53	14.53	17869.7	1	14.53	14.53	1	17869.7	0	17869.7	0	0	0	100	1
1367	Brazil	Bahia	Santo Antonio de Jesus	CRUZ DAS ALMAS	17299.5	1996	4	13.43	0	13.43	0	13.43	0	13.43	0	13.43	13.43	13.43	17991.9	1	13.43	13.43	1	17991.9	0	17991.9	0	0	0	100	1
1368	Brazil	Bahia	Santo Antonio de Jesus	DOM MACEDO COSTA	9154.79	1996	4	1.16	0	1.16	0	1.16	0	1.16	0	1.16	1.16	1.16	1273.46	1	1.16	1.16	1	1273.46	0	1273.46	0	0	0	100	1
1369	Brazil	Bahia	Santo Antonio de Jesus	GOVERNADOR MANGABEIRA	9450.15	1996	4	2.03	0	2.03	0	2.03	0	2.03	0	2.03	2.03	2.03	2858.01	1	2.03	2.03	1	2858.01	0	2858.01	0	0	0	100	1
1370	Brazil	Bahia	Santo Antonio de Jesus	JAGUARIPE	89585.6	1996	4	0	0	0	0	0	0	0	0	0	0	0	0	1	0	0	1	0	0	0	0	-1	-1	-1	-1
1371	Brazil	Bahia	Santo Antonio de Jesus	MARAGOGIPE	43893.9	1996	4	0	0	0	0	0	0	0	0	0	0	0	0	1	0	0	1	0	0	0	0	-1	-1	-1	-1
1372	Brazil	Bahia	Santo Antonio de Jesus	MUNIZ FERREIRA	11589.9	1996	4	0	0	0	0	0	0	0	0	0	0	0	0	1	0	0	1	0	0	0	0	-1	-1	-1	-1
1373	Brazil	Bahia	Santo Antonio de Jesus	MURITIBA	11047.3	1996	4	29.51	0	29.51	0	29.51	0	29.51	0	29.51	29.51	29.51	43137.1	1	29.51	29.51	1	43137.1	0	43137.1	0	0	0	100	1
1374	Brazil	Bahia	Santo Antonio de Jesus	NAZARE	25811.5	1996	4	23.25	0	23.25	0	23.25	0	23.25	0	23.25	23.25	23.25	21777.9	1	23.25	23.25	1	21777.9	0	21777.9	0	0	0	100	1
1375	Brazil	Bahia	Santo Antonio de Jesus	SALINAS DA MARGARIDA	14889.2	1996	4	0	0	0	0	0	0	0	0	0	0	0	0	1	0	0	1	0	0	0	0	-1	-1	-1	-1
1376	Brazil	Bahia	Santo Antonio de Jesus	SANTO AMARO	52401	1996	4	251.18	28.09	223.09	0	251.18	28.09	223.09	0	251.18	250.39	250.39	308924	1	250.39	250.39	1.00316	309899	34656.7	275242	0	11.1832	0.111832	88.8168	0.888168
1377	Brazil	Bahia	Santo Antonio de Jesus	SANTO ANTONIO DE JESUS	25234	1996	4	1.33	0	1.33	0	1.33	0	1.33	0	1.33	1.33	1.33	1619.18	1	1.33	1.33	1	1619.18	0	1619.18	0	0	0	100	1
1378	Brazil	Bahia	Santo Antonio de Jesus	SAO FELIPE	19920.9	1996	4	2.32	0	2.32	0	2.32	0	2.32	0	2.32	2.32	2.32	2128.48	1	2.32	2.32	1	2128.48	0	2128.48	0	0	0	100	1
1379	Brazil	Bahia	Santo Antonio de Jesus	SAO FELIX	9715.72	1996	4	8.72	0	8.72	0	8.72	0	8.72	0	8.72	8.72	8.72	11102.5	1	8.72	8.72	1	11102.5	0	11102.5	0	0	0	100	1
1380	Brazil	Bahia	Santo Antonio de Jesus	SAPEACU	10248.9	1996	4	34.7	0	34.7	0	34.7	0	34.7	0	34.7	34.7	34.7	47792.4	1	34.7	34.7	1	47792.4	0	47792.4	0	0	0	100	1
1381	Brazil	Bahia	Santo Antonio de Jesus	SAUBARA	16111.7	1996	4	0	0	0	0	0	0	0	0	0	0	0	0	1	0	0	1	0	0	0	0	-1	-1	-1	-1
1382	Brazil	Bahia	Santo Antonio de Jesus	VARZEDO	16874.3	1996	4	0	0	0	0	0	0	0	0	0	0	0	0	1	0	0	1	0	0	0	0	-1	-1	-1	-1
1383	Brazil	Bahia	Seabra	ABAIRA	57869.8	1996	4	1004.31	0	1004.31	0	1004.31	0	1004.31	0	1004.31	1004.31	1004.31	7765805	1	1004.31	1004.31	1	7765805	0	7765805	0	0	0	100	1
1384	Brazil	Bahia	Seabra	ANDARAI	190446	1996	4	207.82	207.82	0	0	207.82	207.82	0	0	207.82	197.07	197.07	1.06409e+06	1	197.07	197.07	1.05455	1.12214e+06	1.12214e+06	0	0	100	1	0	0
1385	Brazil	Bahia	Seabra	BARRA DA ESTIVA	141443	1996	4	897.74	17.79	879.95	0	897.74	17.79	879.95	0	897.74	875.11	875.11	3.96797e+06	1	875.11	875.11	1.02586	4.07058e+06	80664.4	3.98992e+06	0	1.9816	0.0198164	98.0184	0.980184
1386	Brazil	Bahia	Seabra	BONINAL	85158.9	1996	4	258.98	25.9	233.08	0	258.98	25.9	233.08	0	258.98	160.2	160.2	799982	1	160.2	160.2	1.6166	1.29325e+06	129335	1.16392e+06	0	10.0008	0.100008	89.9992	0.899992
1387	Brazil	Bahia	Seabra	BONITO	53906.8	1996	4	790.54	36.36	754.18	0	790.54	36.36	754.18	0	790.54	790.54	790.54	4.14092e+06	1	790.54	790.54	1	4.14092e+06	190457	3.95046e+06	0	4.5994	0.0459939	95.4006	0.954006
1388	Brazil	Bahia	Seabra	CONTENDAS DO SINCORA	86530.8	1996	4	889.42	0	889.42	0	889.42	0	889.42	0	889.42	720.04	720.04	3.81813e+06	1	720.04	720.04	1.23524	4.7163e+06	0	4.7163e+06	0	0	0	100	1
1389	Brazil	Bahia	Seabra	IBICOARA	98259.5	1996	4	1308.54	87.88	1220.66	0	1308.54	87.88	1220.66	0	1308.54	1251.56	1251.56	7288981	1	1251.56	1251.56	1.04553	7.62083e+06	511806	7.10902e+06	0	6.7159	0.0671588	93.2841	0.932841
1390	Brazil	Bahia	Seabra	ITAETE	119909	1996	4	325.27	231.89	93.38	0	325.27	231.89	93.38	0	325.27	325.27	325.27	1771116	1	325.27	325.27	1	1771116	1.26266e+06	508460	0	71.2915	0.712915	28.7085	0.287085
1391	Brazil	Bahia	Seabra	JUSSIAPE	52356.6	1996	4	2054.63	25.37	2029.26	0	2054.63	25.37	2029.26	0	2054.63	1731.5	1731.5	9742312	1	1731.5	1731.5	1.18662	1.15604e+07	142745	1.14177e+07	0	1.2348	0.0123477	98.7652	0.987652
1392	Brazil	Bahia	Seabra	LENCOIS	124496	1996	4	1212.52	1045.24	167.28	0	1212.52	1045.24	167.28	0	1212.52	752.74	752.74	3425281	1	752.74	752.74	1.61081	5.51747e+06	4.75628e+06	761194	0	86.2039	0.862039	13.7961	0.137961
1393	Brazil	Bahia	Seabra	MUCUGE	248842	1996	4	7095.49	658.43	6437.06	0	7095.49	658.43	6437.06	0	7095.49	4865.29	4865.29	25854652	1	4865.29	4865.29	1.45839	3.77062e+07	3.49896e+06	3.42072e+07	0	9.2796	0.0927956	90.7204	0.907204
1394	Brazil	Bahia	Seabra	NOVA REDENCAO	51022	1996	4	279.61	279.61	0	0	279.61	279.61	0	0	279.61	279.61	279.61	1.56808e+06	1	279.61	279.61	1	1.56808e+06	1.56808e+06	0	0	100	1	0	0
1395	Brazil	Bahia	Seabra	PALMEIRAS	69655.9	1996	4	938.71	295.09	643.62	0	938.71	295.09	643.62	0	938.71	564.68	564.68	2954527	1	564.68	564.68	1.66238	4.91153e+06	1.54397e+06	3.36756e+06	0	31.4357	0.314357	68.5643	0.685643
1396	Brazil	Bahia	Seabra	PIATA	151652	1996	4	456.88	0.22	456.66	0	456.88	0.22	456.66	0	456.88	456.79	456.79	3.27303e+06	1	456.79	456.79	1.0002	3.27368e+06	1576.36	3.2721e+06	0	0.0482	0.000481527	99.9518	0.999518
1397	Brazil	Bahia	Seabra	RIO DE CONTAS	105748	1996	4	1506.15	37.45	1468.7	0	1506.15	37.45	1468.7	0	1506.15	1459.33	1459.33	9782770	1	1459.33	1459.33	1.03208	1.00966e+07	251050	9.84558e+06	0	2.4865	0.0248647	97.5135	0.975135
1398	Brazil	Bahia	Seabra	SEABRA	266355	1996	4	1007.49	2.99	1004.5	0	1007.49	2.99	1004.5	0	1007.49	902.48	902.48	5.54884e+06	1	902.48	902.48	1.11636	6.19449e+06	18383.8	6.17611e+06	0	0.2968	0.00296777	99.7032	0.997032
1399	Brazil	Bahia	Seabra	UTINGA	72082.2	1996	4	1235.93	700.35	535.58	0	1235.93	700.35	535.58	0	1235.93	1145.3	1145.3	5975332	1	1145.3	1145.3	1.07913	6.44817e+06	3.65391e+06	2.79426e+06	0	56.6658	0.566658	43.3342	0.433342
1400	Brazil	Bahia	Seabra	WAGNER	41588.2	1996	4	1195.73	949.57	246.16	0	1195.73	949.57	246.16	0	1195.73	929.45	929.45	4.61237e+06	1	929.45	929.45	1.28649	5.93377e+06	4.71221e+06	1.22156e+06	0	79.4134	0.794134	20.5866	0.205866
1401	Brazil	Bahia	Senhor do Bonfim	ANDORINHA	121065	1996	4	0	0	0	0	0	0	0	0	0	0	0	0	1	0	0	1	0	0	0	0	-1	-1	-1	-1
1402	Brazil	Bahia	Senhor do Bonfim	ANTONIO GONCALVES	31830	1996	4	0.01	0	0.01	0	0.01	0	0.01	0	0.01	0.01	0.01	41.93	1	0.01	0.01	1	41.93	0	41.93	0	0	0	100	1
1403	Brazil	Bahia	Senhor do Bonfim	CAMPO FORMOSO	683070	1996	4	318.77	318.77	0	0	318.77	318.77	0	0	318.77	318.75	318.75	2.04408e+06	1	318.75	318.75	1.00006	2.04421e+06	2.04421e+06	0	0	100	1	0	0
1404	Brazil	Bahia	Senhor do Bonfim	FILADELFIA	56644.3	1996	4	219.18	2.44	216.74	0	219.18	2.44	216.74	0	219.18	219.18	219.18	933726	1	219.18	219.18	1	933726	10394.6	923332	0	1.1132	0.0111324	98.8868	0.988868
1405	Brazil	Bahia	Senhor do Bonfim	ITIUBA	173829	1996	4	364.07	2	362.07	0	364.07	2	362.07	0	364.07	364.07	364.07	1.40457e+06	1	364.07	364.07	1	1.40457e+06	7715.95	1.39686e+06	0	0.5493	0.00549345	99.4507	0.994507
1406	Brazil	Bahia	Senhor do Bonfim	JAGUARARI	258012	1996	4	322.9	9.59	313.31	0	322.9	9.59	313.31	0	322.9	322.89	322.89	2.65463e+06	1	322.89	322.89	1.00003	2.65471e+06	78843.7	2.57586e+06	0	2.97	0.0296996	97.03	0.9703
1407	Brazil	Bahia	Senhor do Bonfim	PINDOBACU	52987.2	1996	4	332.83	0	332.83	0	332.83	0	332.83	0	332.83	332.83	332.83	1.31631e+06	1	332.83	332.83	1	1.31631e+06	0	1.31631e+06	0	0	0	100	1
1408	Brazil	Bahia	Senhor do Bonfim	SENHOR DO BONFIM	82030.8	1996	4	76.53	2.33	74.2	0	76.53	2.33	74.2	0	76.53	76.53	76.53	386445	1	76.53	76.53	1	386445	11765.5	374679	0	3.0446	0.0304456	96.9554	0.969554
1409	Brazil	Bahia	Senhor do Bonfim	UMBURANAS	182308	1996	4	2.32	2.32	0	0	2.32	2.32	0	0	2.32	2.31	2.31	15066.3	1	2.31	2.31	1.00433	15131.5	15131.5	0	0	100	1	0	0
1410	Brazil	Bahia	Serrinha	ARACI	157572	1996	4	103.05	2.51	100.54	0	103.05	2.51	100.54	0	103.05	103.04	103.04	456903	1	103.04	103.04	1.0001	456947	11129.9	445817	0	2.4357	0.0243571	97.5643	0.975643
1411	Brazil	Bahia	Serrinha	BIRITINGA	59483.4	1996	4	0	0	0	0	0	0	0	0	0	0	0	0	1	0	0	1	0	0	0	0	-1	-1	-1	-1
1412	Brazil	Bahia	Serrinha	CANDEAL	45611	1996	4	0	0	0	0	0	0	0	0	0	0	0	0	1	0	0	1	0	0	0	0	-1	-1	-1	-1
1413	Brazil	Bahia	Serrinha	CAPELA DO ALTO ALEGRE	65863.6	1996	4	26.73	0	26.73	0	26.73	0	26.73	0	26.73	26.73	26.73	90733.8	1	26.73	26.73	1	90733.8	0	90733.8	0	0	0	100	1
1414	Brazil	Bahia	Serrinha	CONCEICAO DO COITE	108863	1996	4	0	0	0	0	0	0	0	0	0	0	0	0	1	0	0	1	0	0	0	0	-1	-1	-1	-1
1415	Brazil	Bahia	Serrinha	GAVIAO	33568.3	1996	4	136.62	0	136.62	0	136.62	0	136.62	0	136.62	136.62	136.62	496185	1	136.62	136.62	1	496185	0	496185	0	0	0	100	1
1416	Brazil	Bahia	Serrinha	ICHU	12879.7	1996	4	0.59	0	0.59	0	0.59	0	0.59	0	0.59	0.59	0.59	1944.73	1	0.59	0.59	1	1944.73	0	1944.73	0	0	0	100	1
1417	Brazil	Bahia	Serrinha	LAMARAO	28255.3	1996	4	1.16	1.16	0	0	1.16	1.16	0	0	1.16	1.16	1.16	2754.53	1	1.16	1.16	1	2754.53	2754.53	0	0	100	1	0	0
1418	Brazil	Bahia	Serrinha	NOVA FATIMA	37355	1996	4	37.21	0	37.21	0	37.21	0	37.21	0	37.21	37.21	37.21	182616	1	37.21	37.21	1	182616	0	182616	0	0	0	100	1
1419	Brazil	Bahia	Serrinha	PE DE SERRA	56432.6	1996	4	0	0	0	0	0	0	0	0	0	0	0	0	1	0	0	1	0	0	0	0	-1	-1	-1	-1
1420	Brazil	Bahia	Serrinha	RETIROLANDIA	20571.2	1996	4	22.38	0	22.38	0	22.38	0	22.38	0	22.38	22.38	22.38	90152.9	1	22.38	22.38	1	90152.9	0	90152.9	0	0	0	100	1
1421	Brazil	Bahia	Serrinha	RIACHAO DO JACUIPE	120158	1996	4	94.2	0	94.2	0	94.2	0	94.2	0	94.2	94.19	94.19	323267	1	94.19	94.19	1.00011	323301	0	323301	0	0	0	100	1
1422	Brazil	Bahia	Serrinha	SANTALUZ	160440	1996	4	1.16	0.01	1.15	0	1.16	0.01	1.15	0	1.16	1.15	1.15	6465.31	1	1.15	1.15	1.0087	6521.53	56.22	6465.31	0	0.8621	0.00862069	99.1379	0.991379
1423	Brazil	Bahia	Serrinha	SAO DOMINGOS	25164	1996	4	85.37	0	85.37	0	85.37	0	85.37	0	85.37	85.37	85.37	384436	1	85.37	85.37	1	384436	0	384436	0	0	0	100	1
1424	Brazil	Bahia	Serrinha	SERRINHA	81057.2	1996	4	89.22	0	89.22	0	89.22	0	89.22	0	89.22	89.22	89.22	234738	1	89.22	89.22	1	234738	0	234738	0	0	0	100	1
1425	Brazil	Bahia	Serrinha	TEOFILANDIA	26544.5	1996	4	0.59	0	0.59	0	0.59	0	0.59	0	0.59	0.59	0.59	1909.39	1	0.59	0.59	1	1909.39	0	1909.39	0	0	0	100	1
1426	Brazil	Bahia	Serrinha	VALENTE	37321.1	1996	4	0	0	0	0	0	0	0	0	0	0	0	0	1	0	0	1	0	0	0	0	-1	-1	-1	-1
1427	Brazil	Bahia	Valenca	CAIRU	45370.6	1996	4	0	0	0	0	0	0	0	0	0	0	0	0	1	0	0	1	0	0	0	0	-1	-1	-1	-1
1428	Brazil	Bahia	Valenca	CAMAMU	88723.3	1996	4	17.35	1.74	15.61	0	17.35	1.74	15.61	0	17.35	17.35	17.35	6451.48	1	17.35	17.35	1	6451.48	647.01	5804.47	0	10.0288	0.100288	89.9712	0.899712
1429	Brazil	Bahia	Valenca	IGRAPIUNA	51120.6	1996	4	1585.6	45.24	1540.36	0	1585.6	45.24	1540.36	0	1585.6	1528.04	1528.04	881230	1	1528.04	1528.04	1.03767	914425	26090.2	888335	0	2.8532	0.0285318	97.1468	0.971468
1430	Brazil	Bahia	Valenca	ITUBERA	42334.9	1996	4	0	0	0	0	0	0	0	0	0	0	0	0	1	0	0	1	0	0	0	0	-1	-1	-1	-1
1431	Brazil	Bahia	Valenca	MARAU	78021.3	1996	4	0	0	0	0	0	0	0	0	0	0	0	0	1	0	0	1	0	0	0	0	-1	-1	-1	-1
1432	Brazil	Bahia	Valenca	NILO PECANHA	38758	1996	4	14.68	1.47	13.21	0	14.68	1.47	13.21	0	14.68	14.68	14.68	3913.69	1	14.68	14.68	1	3913.69	391.9	3521.79	0	10.0136	0.100136	89.9864	0.899864
1433	Brazil	Bahia	Valenca	PIRAI DO NORTE	22831.5	1996	4	0	0	0	0	0	0	0	0	0	0	0	0	1	0	0	1	0	0	0	0	-1	-1	-1	-1
1434	Brazil	Bahia	Valenca	PRESIDENTE TANCREDO NEVES	41445.6	1996	4	0	0	0	0	0	0	0	0	0	0	0	0	1	0	0	1	0	0	0	0	-1	-1	-1	-1
1435	Brazil	Bahia	Valenca	TAPEROA	40996.8	1996	4	10.01	0	10.01	0	10.01	0	10.01	0	10.01	10.01	10.01	5884.32	1	10.01	10.01	1	5884.32	0	5884.32	0	0	0	100	1
1436	Brazil	Bahia	Valenca	VALENCA	119962	1996	4	226.64	2.52	224.12	0	226.64	2.52	224.12	0	226.64	226.64	226.64	144734	1	226.64	226.64	1	144734	1609.29	143125	0	1.1119	0.011119	98.8881	0.988881
1437	Brazil	Bahia	Vitoria da Conquista	ANAGE	186114	1996	4	302.13	0.46	301.67	0	302.13	0.46	301.67	0	302.13	301.77	301.77	1.46671e+06	1	301.77	301.77	1.00119	1.46846e+06	2235.77	1.46623e+06	0	0.1523	0.00152252	99.8477	0.998477
1438	Brazil	Bahia	Vitoria da Conquista	BARRA DO CHOCA	78304.1	1996	4	1322.23	128.55	1193.68	0	1322.23	128.55	1193.68	0	1322.23	1322.23	1322.23	5140431	1	1322.23	1322.23	1	5140431	499764	4.64067e+06	0	9.7222	0.0972221	90.2778	0.902778
1439	Brazil	Bahia	Vitoria da Conquista	BELO CAMPO	60750.7	1996	4	80.88	1.02	79.86	0	80.88	1.02	79.86	0	80.88	80.86	80.86	410231	1	80.86	80.86	1.00025	410333	5174.82	405158	0	1.2611	0.0126113	98.7389	0.987389
1440	Brazil	Bahia	Vitoria da Conquista	BOA NOVA	85747.9	1996	4	48.72	0	48.72	0	48.72	0	48.72	0	48.72	48.72	48.72	163407	1	48.72	48.72	1	163407	0	163407	0	0	0	100	1
1441	Brazil	Bahia	Vitoria da Conquista	BOM JESUS DA SERRA	41293.2	1996	4	1.33	0	1.33	0	1.33	0	1.33	0	1.33	1.33	1.33	5528.94	1	1.33	1.33	1	5528.94	0	5528.94	0	0	0	100	1
1442	Brazil	Bahia	Vitoria da Conquista	CAATIBA	65826.2	1996	4	0	0	0	0	0	0	0	0	0	0	0	0	1	0	0	1	0	0	0	0	-1	-1	-1	-1
1443	Brazil	Bahia	Vitoria da Conquista	CAETANOS	85801.8	1996	4	77.41	0	77.41	0	77.41	0	77.41	0	77.41	77.41	77.41	318260	1	77.41	77.41	1	318260	0	318260	0	0	0	100	1
1444	Brazil	Bahia	Vitoria da Conquista	CANDIDO SALES	130384	1996	4	181.25	22.24	159.01	0	181.25	22.24	159.01	0	181.25	181.25	181.25	901867	1	181.25	181.25	1	901867	110662	791205	0	12.2703	0.122703	87.7297	0.877297
1445	Brazil	Bahia	Vitoria da Conquista	DARIO MEIRA	40220.5	1996	4	1.74	0.01	1.73	0	1.74	0.01	1.73	0	1.74	1.74	1.74	2437.73	1	1.74	1.74	1	2437.73	14.01	2423.72	0	0.5747	0.00574713	99.4253	0.994253
1446	Brazil	Bahia	Vitoria da Conquista	IBICUI	116547	1996	4	261.98	0	261.98	0	261.98	0	261.98	0	261.98	214.64	214.64	327730	1	214.64	214.64	1.22056	400012	0	400012	0	0	0	100	1
1447	Brazil	Bahia	Vitoria da Conquista	IGUAI	83682.8	1996	4	76.49	0	76.49	0	76.49	0	76.49	0	76.49	76.49	76.49	172413	1	76.49	76.49	1	172413	0	172413	0	0	0	100	1
1448	Brazil	Bahia	Vitoria da Conquista	MANOEL VITORINO	241107	1996	4	11.75	0	11.75	0	11.75	0	11.75	0	11.75	11.7	11.7	46745.1	1	11.7	11.7	1.00427	46944.9	0	46944.9	0	0	0	100	1
1449	Brazil	Bahia	Vitoria da Conquista	MIRANTE	93231.9	1996	4	22.69	0	22.69	0	22.69	0	22.69	0	22.69	22.64	22.64	89190.5	1	22.64	22.64	1.00221	89387.5	0	89387.5	0	0	0	100	1
1450	Brazil	Bahia	Vitoria da Conquista	NOVA CANAA	56779.4	1996	4	20.02	0	20.02	0	20.02	0	20.02	0	20.02	20.02	20.02	42213.2	1	20.02	20.02	1	42213.2	0	42213.2	0	0	0	100	1
1451	Brazil	Bahia	Vitoria da Conquista	PLANALTO	91480.1	1996	4	443.06	6.64	436.42	0	443.06	6.64	436.42	0	443.06	395.19	395.19	1.7689e+06	1	395.19	395.19	1.12113	1.98317e+06	29721.1	1.95345e+06	0	1.4987	0.0149867	98.5013	0.985013
1452	Brazil	Bahia	Vitoria da Conquista	POCOES	96810.4	1996	4	777.24	12.69	764.55	0	777.24	12.69	764.55	0	777.24	754.68	754.68	2.97386e+06	1	754.68	754.68	1.02989	3.06276e+06	50005.8	3.01276e+06	0	1.6327	0.016327	98.3673	0.983673
1453	Brazil	Bahia	Vitoria da Conquista	VITORIA DA CONQUISTA	322097	1996	4	1238.18	173.64	1064.54	0	1238.18	173.64	1064.54	0	1238.18	1230.57	1230.57	5.07991e+06	1	1230.57	1230.57	1.00618	5.11133e+06	716803	4.39453e+06	0	14.0238	0.140238	85.9762	0.859762
1454	Brazil	Ceara	Baixo Curu	PARACURU	29738.5	1996	4	2134.15	1090.95	1043.2	0	2134.15	1090.95	1043.2	0	2134.15	2129.74	2129.74	15098361	1	2129.74	2129.74	1.00207	1.51296e+07	7.73407e+06	7.39556e+06	0	51.1187	0.511187	48.8813	0.488813
1455	Brazil	Ceara	Baixo Curu	PARAIPABA	31370.8	1996	4	2627.5	1313.75	1313.75	0	2627.5	1313.75	1313.75	0	2627.5	2613.03	2613.03	18267018	1	2613.03	2613.03	1.00554	1.83682e+07	9.18409e+06	9.18409e+06	0	50	0.5	50	0.5
1456	Brazil	Ceara	Baixo Curu	SAO GONCALO DO AMARANTE	84663.4	1996	4	487.7	277.37	210.33	0	487.7	277.37	210.33	0	487.7	487.7	487.7	4.17431e+06	1	487.7	487.7	1	4.17431e+06	2.37406e+06	1.80025e+06	0	56.8731	0.568731	43.1269	0.431269
1457	Brazil	Ceara	Baixo Jaguaribe	ALTO SANTO	132044	1996	4	917.05	64.2	852.85	0	917.05	64.2	852.85	0	917.05	915.42	915.42	7872593	1	915.42	915.42	1.00178	7.88661e+06	552119	7.33449e+06	0	7.0007	0.0700071	92.9993	0.929993
1458	Brazil	Ceara	Baixo Jaguaribe	IBICUITINGA	38138.3	1996	4	75.11	0	75.11	0	75.11	0	75.11	0	75.11	75.11	75.11	702528	1	75.11	75.11	1	702528	0	702528	0	0	0	100	1
1459	Brazil	Ceara	Baixo Jaguaribe	JAGUARUANA	74559.4	1996	4	2359.03	617.2	1741.83	0	2359.03	617.2	1741.83	0	2359.03	2359.03	2359.03	22181232	1	2359.03	2359.03	1	22181232	5.80334e+06	1.63779e+07	0	26.1633	0.261633	73.8367	0.738367
1460	Brazil	Ceara	Baixo Jaguaribe	LIMOEIRO DO NORTE	77257.1	1996	4	3734.61	807.37	2927.24	0	3734.61	807.37	2927.24	0	3734.61	3726.74	3726.74	29939902	1	3726.74	3726.74	1.00211	3.00031e+07	6.48625e+06	2.35169e+07	0	21.6186	0.216186	78.3814	0.783814
1461	Brazil	Ceara	Baixo Jaguaribe	MORADA NOVA	279581	1996	4	2307.13	232.01	2075.12	0	2307.13	232.01	2075.12	0	2307.13	2304.13	2304.13	17794918	1	2304.13	2304.13	1.0013	1.78181e+07	1.79183e+06	1.60263e+07	0	10.0562	0.100562	89.9438	0.899438
1462	Brazil	Ceara	Baixo Jaguaribe	PALHANO	43832.8	1996	4	3.33	0.9	2.43	0	3.33	0.9	2.43	0	3.33	3.32	3.32	32419.5	1	3.32	3.32	1.00301	32517.1	8788.42	23728.7	0	27.027	0.27027	72.973	0.72973
1463	Brazil	Ceara	Baixo Jaguaribe	QUIXERE	59954.9	1996	4	712.82	671.96	40.86	0	712.82	671.96	40.86	0	712.82	711.85	711.85	5.65729e+06	1	711.85	711.85	1.00136	5.665e+06	5.34027e+06	324727	0	94.2678	0.942678	5.7322	0.0573216
1464	Brazil	Ceara	Baixo Jaguaribe	RUSSAS	161592	1996	4	1651.71	202.29	1449.42	0	1651.71	202.29	1449.42	0	1651.71	1650.4	1650.4	15389303	1	1650.4	1650.4	1.00079	1.54015e+07	1.88627e+06	1.35152e+07	0	12.2473	0.122473	87.7527	0.877527
1465	Brazil	Ceara	Baixo Jaguaribe	SAO JOAO DO JAGUARIBE	28620.9	1996	4	1270.01	117.8	1152.21	0	1270.01	117.8	1152.21	0	1270.01	1270.01	1270.01	10793311	1	1270.01	1270.01	1	10793311	1.00114e+06	9.79218e+06	0	9.2755	0.0927552	90.7245	0.907245
1466	Brazil	Ceara	Baixo Jaguaribe	TABULEIRO DO NORTE	83279.1	1996	4	463.44	173.73	289.71	0	463.44	173.73	289.71	0	463.44	463.44	463.44	4.08195e+06	1	463.44	463.44	1	4.08195e+06	1.5302e+06	2.55175e+06	0	37.4871	0.374871	62.5129	0.625129
1467	Brazil	Ceara	Barro	AURORA	89390.8	1996	4	425.41	0	425.41	0	425.41	0	425.41	0	425.41	425.41	425.41	4.16117e+06	1	425.41	425.41	1	4.16117e+06	0	4.16117e+06	0	0	0	100	1
1468	Brazil	Ceara	Barro	BARRO	69729.6	1996	4	125.37	18.18	107.19	0	125.37	18.18	107.19	0	125.37	125.37	125.37	1.23334e+06	1	125.37	125.37	1	1.23334e+06	178848	1.0545e+06	0	14.5011	0.145011	85.4989	0.854989
1469	Brazil	Ceara	Barro	MAURITI	104413	1996	4	677.04	399.26	277.78	0	677.04	399.26	277.78	0	677.04	674.43	674.43	6196300	1	674.43	674.43	1.00387	6.22028e+06	3.66819e+06	2.55209e+06	0	58.9714	0.589714	41.0286	0.410286
1470	Brazil	Ceara	Baturite	ACARAPE	13732.9	1996	4	424.82	163.39	261.43	0	424.82	163.39	261.43	0	424.82	424.82	424.82	4.15186e+06	1	424.82	424.82	1	4.15186e+06	1.59685e+06	2.55502e+06	0	38.461	0.38461	61.539	0.61539
1471	Brazil	Ceara	Baturite	ARACOIABA	62976.7	1996	4	453.47	133.55	319.92	0	453.47	133.55	319.92	0	453.47	453.47	453.47	4.21452e+06	1	453.47	453.47	1	4.21452e+06	1.2412e+06	2.97332e+06	0	29.4507	0.294507	70.5493	0.705493
1472	Brazil	Ceara	Baturite	ARATUBA	15597.4	1996	4	304.71	32	272.71	0	304.71	32	272.71	0	304.71	304.71	304.71	2229643	1	304.71	304.71	1	2229643	234152	1.99549e+06	0	10.5018	0.105018	89.4982	0.894982
1473	Brazil	Ceara	Baturite	BATURITE	34751	1996	4	577.3	0	577.3	0	577.3	0	577.3	0	577.3	577.3	577.3	4939784	1	577.3	577.3	1	4939784	0	4939784	0	0	0	100	1
1474	Brazil	Ceara	Baturite	CAPISTRANO	18671.2	1996	4	84.98	0	84.98	0	84.98	0	84.98	0	84.98	84.98	84.98	750953	1	84.98	84.98	1	750953	0	750953	0	0	0	100	1
1475	Brazil	Ceara	Baturite	GUARAMIRANGA	10814.9	1996	4	126.74	6	120.74	0	126.74	6	120.74	0	126.74	126.74	126.74	921304	1	126.74	126.74	1	921304	43615.5	877689	0	4.7341	0.047341	95.2659	0.952659
1476	Brazil	Ceara	Baturite	ITAPIUNA	59241.9	1996	4	190.52	1.53	188.99	0	190.52	1.53	188.99	0	190.52	190.52	190.52	1.67826e+06	1	190.52	190.52	1	1.67826e+06	13477.6	1.66479e+06	0	0.8031	0.00803065	99.1969	0.991969
1477	Brazil	Ceara	Baturite	MULUNGU	10285.8	1996	4	208.18	16	192.18	0	208.18	16	192.18	0	208.18	206.96	206.96	1.20528e+06	1	206.96	206.96	1.00589	1.21238e+06	93179.4	1.1192e+06	0	7.6857	0.0768566	92.3143	0.923143
1478	Brazil	Ceara	Baturite	PACOTI	9471.25	1996	4	267.41	0	267.41	0	267.41	0	267.41	0	267.41	267.41	267.41	1.93439e+06	1	267.41	267.41	1	1.93439e+06	0	1.93439e+06	0	0	0	100	1
1479	Brazil	Ceara	Baturite	PALMACIA	14944.1	1996	4	303.12	0	303.12	0	303.12	0	303.12	0	303.12	303.12	303.12	2524112	1	303.12	303.12	1	2524112	0	2524112	0	0	0	100	1
1480	Brazil	Ceara	Baturite	REDENCAO	24149.8	1996	4	358	97.5	260.5	0	358	97.5	260.5	0	358	358	358	3.29192e+06	1	358	358	1	3.29192e+06	896543	2.39538e+06	0	27.2346	0.272346	72.7654	0.727654
1481	Brazil	Ceara	Brejo Santo	ABAIARA	18224	1996	4	70.88	58.18	12.7	0	70.88	58.18	12.7	0	70.88	70.88	70.88	755682	1	70.88	70.88	1	755682	620282	135400	0	82.0824	0.820824	17.9176	0.179176
1482	Brazil	Ceara	Brejo Santo	BREJO SANTO	68236.7	1996	4	410.93	280.21	130.72	0	410.93	280.21	130.72	0	410.93	409.58	409.58	4.13987e+06	1	409.58	409.58	1.0033	4.15352e+06	2.83225e+06	1.32127e+06	0	68.1892	0.681892	31.8108	0.318108
1483	Brazil	Ceara	Brejo Santo	JATI	34558.9	1996	4	27.07	0.97	26.1	0	27.07	0.97	26.1	0	27.07	27.07	27.07	320440	1	27.07	27.07	1	320440	11482.3	308958	0	3.5833	0.035833	96.4167	0.964167
1484	Brazil	Ceara	Brejo Santo	MILAGRES	62060.6	1996	4	39.86	19.96	19.9	0	39.86	19.96	19.9	0	39.86	39.86	39.86	408665	1	39.86	39.86	1	408665	204640	204025	0	50.0753	0.500753	49.9247	0.499247
1485	Brazil	Ceara	Brejo Santo	PENAFORTE	17817.4	1996	4	19.39	19.39	0	0	19.39	19.39	0	0	19.39	19.39	19.39	250160	1	19.39	19.39	1	250160	250160	0	0	100	1	0	0
1486	Brazil	Ceara	Caninde	CANINDE	320514	1996	4	965.04	6	959.04	0	965.04	6	959.04	0	965.04	964.78	964.78	7.68126e+06	1	964.78	964.78	1.00027	7.68333e+06	47770	7.63556e+06	0	0.6217	0.00621736	99.3783	0.993783
1487	Brazil	Ceara	Caninde	CARIDADE	79020.2	1996	4	123.24	0	123.24	0	123.24	0	123.24	0	123.24	123.11	123.11	944828	1	123.11	123.11	1.00106	945826	0	945826	0	0	0	100	1
1488	Brazil	Ceara	Caninde	ITATIRA	74047.9	1996	4	78.28	0	78.28	0	78.28	0	78.28	0	78.28	78.28	78.28	657592	1	78.28	78.28	1	657592	0	657592	0	0	0	100	1
1489	Brazil	Ceara	Caninde	PARAMOTI	51645	1996	4	53.49	0	53.49	0	53.49	0	53.49	0	53.49	53.49	53.49	473541	1	53.49	53.49	1	473541	0	473541	0	0	0	100	1
1490	Brazil	Ceara	Cariri	BARBALHA	45273.2	1996	4	1293.58	671.34	622.24	0	1293.58	671.34	622.24	0	1293.58	1290.74	1290.74	13582051	1	1290.74	1290.74	1.0022	1.36119e+07	7.0643e+06	6.54764e+06	0	51.8978	0.518978	48.1022	0.481022
1491	Brazil	Ceara	Cariri	CRATO	111571	1996	4	732.97	178.12	554.85	0	732.97	178.12	554.85	0	732.97	732.97	732.97	8.00176e+06	1	732.97	732.97	1	8.00176e+06	1.94452e+06	6.05724e+06	0	24.3011	0.243011	75.6989	0.756989
1492	Brazil	Ceara	Cariri	JARDIM	50120.5	1996	4	272.24	65.61	206.63	0	272.24	65.61	206.63	0	272.24	272.04	272.04	2.85702e+06	1	272.04	272.04	1.00074	2.85912e+06	689050	2.17007e+06	0	24.1001	0.241001	75.8999	0.758999
1493	Brazil	Ceara	Cariri	JUAZEIRO DO NORTE	23540.2	1996	4	1081.76	266.44	815.32	0	1081.76	266.44	815.32	0	1081.76	1079.8	1079.8	11140765	1	1079.8	1079.8	1.00182	1.1161e+07	2.74898e+06	8.41201e+06	0	24.6302	0.246302	75.3698	0.753698
1494	Brazil	Ceara	Cariri	MISSAO VELHA	53219.6	1996	4	971.63	340.04	631.59	0	971.63	340.04	631.59	0	971.63	971	971	11222913	1	971	971	1.00065	1.12302e+07	3.93022e+06	7.29998e+06	0	34.9969	0.349969	65.0031	0.650031
1495	Brazil	Ceara	Cariri	NOVA OLINDA	29253.5	1996	4	18.15	0	18.15	0	18.15	0	18.15	0	18.15	18.15	18.15	203018	1	18.15	18.15	1	203018	0	203018	0	0	0	100	1
1496	Brazil	Ceara	Cariri	PORTEIRAS	19091.5	1996	4	323.51	42.44	281.07	0	323.51	42.44	281.07	0	323.51	323.16	323.16	3.4941e+06	1	323.16	323.16	1.00108	3.49788e+06	458873	3.03901e+06	0	13.1186	0.131186	86.8814	0.868814
1497	Brazil	Ceara	Cariri	SANTANA DO CARIRI	80722.6	1996	4	129.67	32.42	97.25	0	129.67	32.42	97.25	0	129.67	129.67	129.67	1.41749e+06	1	129.67	129.67	1	1.41749e+06	354399	1.06309e+06	0	25.0019	0.250019	74.9981	0.749981
1498	Brazil	Ceara	Caririacu	ALTANEIRA	8819.46	1996	4	0.61	0	0.61	0	0.61	0	0.61	0	0.61	0.61	0.61	6076.57	1	0.61	0.61	1	6076.57	0	6076.57	0	0	0	100	1
1499	Brazil	Ceara	Caririacu	CARIRIACU	68857.7	1996	4	58.48	0	58.48	0	58.48	0	58.48	0	58.48	58.48	58.48	632211	1	58.48	58.48	1	632211	0	632211	0	0	0	100	1
1500	Brazil	Ceara	Caririacu	FARIAS BRITO	47765.7	1996	4	155.82	0	155.82	0	155.82	0	155.82	0	155.82	155.81	155.81	1414047	1	155.81	155.81	1.00006	1.41414e+06	0	1.41414e+06	0	0	0	100	1
1501	Brazil	Ceara	Caririacu	GRANJEIRO	9895.96	1996	4	28.39	0	28.39	0	28.39	0	28.39	0	28.39	28.39	28.39	254315	1	28.39	28.39	1	254315	0	254315	0	0	0	100	1
1502	Brazil	Ceara	Cascavel	BEBERIBE	162526	1996	4	153.86	77.02	76.84	0	153.86	77.02	76.84	0	153.86	153.86	153.86	1.31163e+06	1	153.86	153.86	1	1.31163e+06	656583	655048	0	50.0585	0.500585	49.9415	0.499415
1503	Brazil	Ceara	Cascavel	CASCAVEL	82048.4	1996	4	104.56	50.69	53.87	0	104.56	50.69	53.87	0	104.56	104.56	104.56	868732	1	104.56	104.56	1	868732	421156	447577	0	48.4793	0.484793	51.5207	0.515207
1504	Brazil	Ceara	Cascavel	PINDORETAMA	7581.12	1996	4	19.55	9.78	9.77	0	19.55	9.78	9.77	0	19.55	19.55	19.55	160092	1	19.55	19.55	1	160092	80087.1	80005.2	0	50.0256	0.500256	49.9744	0.499744
1505	Brazil	Ceara	Chapada do Araripe	ARARIPE	104476	1996	4	1.61	0.4	1.21	0	1.61	0.4	1.21	0	1.61	1.61	1.61	18007.9	1	1.61	1.61	1	18007.9	4474.01	13533.9	0	24.8447	0.248447	75.1553	0.751553
1506	Brazil	Ceara	Chapada do Araripe	ASSARE	112328	1996	4	17.08	1.31	15.77	0	17.08	1.31	15.77	0	17.08	17.08	17.08	170224	1	17.08	17.08	1	170224	13055.8	157168	0	7.6698	0.0766979	92.3302	0.923302
1507	Brazil	Ceara	Chapada do Araripe	CAMPOS SALES	109383	1996	4	92.29	6.61	85.68	0	92.29	6.61	85.68	0	92.29	91.97	91.97	899434	1	91.97	91.97	1.00348	902563	64643.4	837920	0	7.1622	0.0716221	92.8378	0.928378
1508	Brazil	Ceara	Chapada do Araripe	POTENGI	33480.9	1996	4	7.65	0	7.65	0	7.65	0	7.65	0	7.65	7.65	7.65	91606.4	1	7.65	7.65	1	91606.4	0	91606.4	0	0	0	100	1
1509	Brazil	Ceara	Chapada do Araripe	SALITRE	79564.8	1996	4	1.33	0.24	1.09	0	1.33	0.24	1.09	0	1.33	1.32	1.32	14846.4	1	1.32	1.32	1.00758	14958.8	2699.34	12259.5	0	18.0451	0.180451	81.9549	0.819549
1510	Brazil	Ceara	Chorozinho	BARREIRA	22813.1	1996	4	111.92	55.96	55.96	0	111.92	55.96	55.96	0	111.92	111.92	111.92	994877	1	111.92	111.92	1	994877	497438	497438	0	50	0.5	50	0.5
1511	Brazil	Ceara	Chorozinho	CHOROZINHO	30970.3	1996	4	24.98	12.49	12.49	0	24.98	12.49	12.49	0	24.98	24.98	24.98	225388	1	24.98	24.98	1	225388	112694	112694	0	50	0.5	50	0.5
1512	Brazil	Ceara	Chorozinho	OCARA	77379.1	1996	4	24.32	23.96	0.36	0	24.32	23.96	0.36	0	24.32	24.32	24.32	220862	1	24.32	24.32	1	220862	217593	3269.34	0	98.5197	0.985197	1.4803	0.0148026
1513	Brazil	Ceara	Coreau	COREAU	81488.1	1996	4	11	0	11	0	11	0	11	0	11	11	11	100702	1	11	11	1	100702	0	100702	0	0	0	100	1
1514	Brazil	Ceara	Coreau	FRECHEIRINHA	13789.1	1996	4	9.13	2	7.13	0	9.13	2	7.13	0	9.13	9.13	9.13	78834.1	1	9.13	9.13	1	78834.1	17269.2	61564.9	0	21.9058	0.219058	78.0942	0.780942
1515	Brazil	Ceara	Coreau	MORAUJO	46980.2	1996	4	2.33	0	2.33	0	2.33	0	2.33	0	2.33	2.33	2.33	19322	1	2.33	2.33	1	19322	0	19322	0	0	0	100	1
1516	Brazil	Ceara	Coreau	URUOCA	68929.7	1996	4	6.17	2	4.17	0	6.17	2	4.17	0	6.17	6.15	6.15	49742.2	1	6.15	6.15	1.00325	49904	16176.3	33727.6	0	32.4149	0.324149	67.5851	0.675851
1517	Brazil	Ceara	Fortaleza	AQUIRAZ	48746.1	1996	4	383.62	182.53	201.09	0	383.62	182.53	201.09	0	383.62	383.62	383.62	3.28347e+06	1	383.62	383.62	1	3.28347e+06	1.5623e+06	1.72116e+06	0	47.5809	0.475809	52.4191	0.524191
1518	Brazil	Ceara	Fortaleza	CAUCAIA	119364	1996	4	210.32	133.87	76.45	0	210.32	133.87	76.45	0	210.32	209.87	209.87	1266443	1	209.87	209.87	1.00214	1.26916e+06	807827	461331	0	63.6506	0.636506	36.3494	0.363494
1519	Brazil	Ceara	Fortaleza	EUSEBIO	7727.1	1996	4	46.18	46.18	0	0	46.18	46.18	0	0	46.18	46.18	46.18	384290	1	46.18	46.18	1	384290	384290	0	0	100	1	0	0
1520	Brazil	Ceara	Fortaleza	FORTALEZA	31471.1	1996	4	132.22	66.11	66.11	0	132.22	66.11	66.11	0	132.22	132.22	132.22	444124	1	132.22	132.22	1	444124	222062	222062	0	50	0.5	50	0.5
1521	Brazil	Ceara	Fortaleza	GUAIUBA	27094.2	1996	4	595.03	0	595.03	0	595.03	0	595.03	0	595.03	592.74	592.74	4459362	1	592.74	592.74	1.00386	4.47659e+06	0	4.47659e+06	0	0	0	100	1
1522	Brazil	Ceara	Fortaleza	ITAITINGA	15331	1996	4	188.97	37.4	151.57	0	188.97	37.4	151.57	0	188.97	188.97	188.97	1.4886e+06	1	188.97	188.97	1	1.4886e+06	294617	1.19399e+06	0	19.7915	0.197915	80.2085	0.802085
1523	Brazil	Ceara	Fortaleza	MARACANAU	9769	1996	4	94.93	5.42	89.51	0	94.93	5.42	89.51	0	94.93	94.74	94.74	600555	1	94.74	94.74	1.00201	601760	34357.3	567402	0	5.7095	0.0570947	94.2905	0.942905
1524	Brazil	Ceara	Fortaleza	MARANGUAPE	65617.6	1996	4	1347.49	8	1339.49	0	1347.49	8	1339.49	0	1347.49	1344.93	1344.93	10824680	1	1344.93	1344.93	1.0019	1.08453e+07	64388.1	1.07809e+07	0	0.5937	0.00593696	99.4063	0.994063
1525	Brazil	Ceara	Fortaleza	PACATUBA	13803.4	1996	4	49.94	4.68	45.26	0	49.94	4.68	45.26	0	49.94	49.9	49.9	397565	1	49.9	49.9	1.0008	397884	37286.7	360597	0	9.3712	0.0937125	90.6288	0.906288
1526	Brazil	Ceara	Ibiapaba	CARNAUBAL	29131.1	1996	4	63.12	31.56	31.56	0	63.12	31.56	31.56	0	63.12	63.12	63.12	542339	1	63.12	63.12	1	542339	271169	271169	0	50	0.5	50	0.5
1527	Brazil	Ceara	Ibiapaba	CROATA	38541.6	1996	4	141.28	85.64	55.64	0	141.28	85.64	55.64	0	141.28	141.28	141.28	1.29107e+06	1	141.28	141.28	1	1.29107e+06	782609	508458	0	60.6172	0.606172	39.3828	0.393828
1528	Brazil	Ceara	Ibiapaba	GUARACIABA DO NORTE	53794.2	1996	4	609.96	364.98	244.98	0	609.96	364.98	244.98	0	609.96	609.35	609.35	5.05156e+06	1	609.35	609.35	1.001	5.05662e+06	3.02571e+06	2.0309e+06	0	59.8367	0.598367	40.1633	0.401633
1529	Brazil	Ceara	Ibiapaba	IBIAPINA	36704.2	1996	4	307.95	198.97	108.98	0	307.95	198.97	108.98	0	307.95	307.95	307.95	2.63162e+06	1	307.95	307.95	1	2.63162e+06	1.70032e+06	931299	0	64.6111	0.646111	35.3889	0.353889
1530	Brazil	Ceara	Ibiapaba	SAO BENEDITO	29824.5	1996	4	460.56	320.28	140.28	0	460.56	320.28	140.28	0	460.56	460.56	460.56	4.05999e+06	1	460.56	460.56	1	4.05999e+06	2.82337e+06	1.23661e+06	0	69.5414	0.695414	30.4586	0.304586
1531	Brazil	Ceara	Ibiapaba	TIANGUA	64688.2	1996	4	3915.56	1951.75	1963.81	0	3915.56	1951.75	1963.81	0	3915.56	3898.99	3898.99	28270144	1	3898.99	3898.99	1.00425	2.83903e+07	1.41514e+07	1.42389e+07	0	49.846	0.49846	50.154	0.50154
1532	Brazil	Ceara	Ibiapaba	UBAJARA	29207.3	1996	4	1065.86	532.93	532.93	0	1065.86	532.93	532.93	0	1065.86	1065.86	1065.86	8750491	1	1065.86	1065.86	1	8750491	4.37525e+06	4.37525e+06	0	50	0.5	50	0.5
1533	Brazil	Ceara	Ibiapaba	VICOSA DO CEARA	130462	1996	4	206.42	188.85	17.57	0	206.42	188.85	17.57	0	206.42	206.29	206.29	1.62155e+06	1	206.29	206.29	1.00063	1.62257e+06	1.48446e+06	138109	0	91.4882	0.914882	8.5118	0.0851177
1534	Brazil	Ceara	Iguatu	CEDRO	67970.4	1996	4	202.75	0	202.75	0	202.75	0	202.75	0	202.75	202.75	202.75	1.89044e+06	1	202.75	202.75	1	1.89044e+06	0	1.89044e+06	0	0	0	100	1
1535	Brazil	Ceara	Iguatu	ICO	193648	1996	4	2571.72	747.62	1824.1	0	2571.72	747.62	1824.1	0	2571.72	2544.7	2544.7	19389622	1	2544.7	2544.7	1.01062	1.95955e+07	5.69657e+06	1.38989e+07	0	29.0708	0.290708	70.9292	0.709292
1536	Brazil	Ceara	Iguatu	IGUATU	104057	1996	4	1888.44	539.95	1348.49	0	1888.44	539.95	1348.49	0	1888.44	1884.23	1884.23	14218767	1	1884.23	1884.23	1.00223	1.42505e+07	4.07457e+06	1.0176e+07	0	28.5924	0.285924	71.4076	0.714076
1537	Brazil	Ceara	Iguatu	OROS	59994.2	1996	4	348.66	116.22	232.44	0	348.66	116.22	232.44	0	348.66	346.16	346.16	2.81672e+06	1	346.16	346.16	1.00722	2.83706e+06	945686	1.89137e+06	0	33.3333	0.333333	66.6667	0.666667
1538	Brazil	Ceara	Iguatu	QUIXELO	55345.3	1996	4	708.08	291.93	416.15	0	708.08	291.93	416.15	0	708.08	708.08	708.08	5.78118e+06	1	708.08	708.08	1	5.78118e+06	2.38349e+06	3.39769e+06	0	41.2284	0.412284	58.7716	0.587716
1539	Brazil	Ceara	Ipu	IPU	63598.2	1996	4	666.35	320.77	345.58	0	666.35	320.77	345.58	0	666.35	665.53	665.53	5740865	1	665.53	665.53	1.00123	5.74794e+06	2.76696e+06	2.98097e+06	0	48.1384	0.481384	51.8616	0.518616
1540	Brazil	Ceara	Ipu	IPUEIRAS	112887	1996	4	92.17	13.31	78.86	0	92.17	13.31	78.86	0	92.17	92.17	92.17	931780	1	92.17	92.17	1	931780	134556	797224	0	14.4407	0.144407	85.5593	0.855593
1541	Brazil	Ceara	Ipu	PIRES FERREIRA	24717.5	1996	4	23.86	5.97	17.89	0	23.86	5.97	17.89	0	23.86	23.81	23.81	217560	1	23.81	23.81	1.0021	218017	54550	163467	0	25.021	0.25021	74.979	0.74979
1542	Brazil	Ceara	Ipu	PORANGA	24754	1996	4	18.12	9.06	9.06	0	18.12	9.06	9.06	0	18.12	18.12	18.12	169731	1	18.12	18.12	1	169731	84865.5	84865.5	0	50	0.5	50	0.5
1543	Brazil	Ceara	Ipu	RERIUTABA	36648.3	1996	4	42.68	10	32.68	0	42.68	10	32.68	0	42.68	42.66	42.66	412151	1	42.66	42.66	1.00047	412344	96613	315731	0	23.4302	0.234302	76.5698	0.765698
1544	Brazil	Ceara	Ipu	VARJOTA	22242.2	1996	4	14.32	0	14.32	0	14.32	0	14.32	0	14.32	14.32	14.32	131652	1	14.32	14.32	1	131652	0	131652	0	0	0	100	1
1545	Brazil	Ceara	Itapipoca	AMONTADA	119357	1996	4	397.14	198.57	198.57	0	397.14	198.57	198.57	0	397.14	396.91	396.91	3.12626e+06	1	396.91	396.91	1.00058	3.12808e+06	1.56404e+06	1.56404e+06	0	50	0.5	50	0.5
1546	Brazil	Ceara	Itapipoca	ITAPIPOCA	157975	1996	4	192.68	101.3	91.38	0	192.68	101.3	91.38	0	192.68	192.68	192.68	1.47157e+06	1	192.68	192.68	1	1.47157e+06	773664	697902	0	52.5742	0.525742	47.4258	0.474258
1547	Brazil	Ceara	Itapipoca	TRAIRI	94407.5	1996	4	965.99	513	452.99	0	965.99	513	452.99	0	965.99	965.99	965.99	7428210	1	965.99	965.99	1	7428210	3.94484e+06	3.48337e+06	0	53.1061	0.531061	46.8939	0.468939
1548	Brazil	Ceara	Lavras da Mangabeira	BAIXIO	14195.1	1996	4	125.88	0	125.88	0	125.88	0	125.88	0	125.88	125.15	125.15	1.05808e+06	1	125.15	125.15	1.00583	1.06425e+06	0	1.06425e+06	0	0	0	100	1
1549	Brazil	Ceara	Lavras da Mangabeira	IPAUMIRIM	28896.6	1996	4	74.41	0	74.41	0	74.41	0	74.41	0	74.41	74.41	74.41	675434	1	74.41	74.41	1	675434	0	675434	0	0	0	100	1
1550	Brazil	Ceara	Lavras da Mangabeira	LAVRAS DA MANGABEIRA	99200.4	1996	4	746.64	36.34	710.3	0	746.64	36.34	710.3	0	746.64	746.63	746.63	6984555	1	746.63	746.63	1.00001	6.98465e+06	339952	6.6447e+06	0	4.8671	0.0486714	95.1329	0.951329
1551	Brazil	Ceara	Lavras da Mangabeira	UMARI	26442.8	1996	4	104.54	16.08	88.46	0	104.54	16.08	88.46	0	104.64	104.29	104.29	949441	0.999044	104.19	104.19	1.00336	951720	146390	805329	0	15.3817	0.153817	84.6183	0.846183
1552	Brazil	Ceara	Litoral de Aracati	ARACATI	127843	1996	4	244.1	244.1	0	0	244.1	244.1	0	0	244.1	244.1	244.1	2.23971e+06	1	244.1	244.1	1	2.23971e+06	2.23971e+06	0	0	100	1	0	0
1553	Brazil	Ceara	Litoral de Aracati	FORTIM	27901.8	1996	4	148.54	74.27	74.27	0	148.54	74.27	74.27	0	148.54	148.54	148.54	1.26626e+06	1	148.54	148.54	1	1.26626e+06	633129	633129	0	50	0.5	50	0.5
1554	Brazil	Ceara	Litoral de Aracati	ICAPUI	42976.4	1996	4	709.16	354.58	354.58	0	709.16	354.58	354.58	0	709.22	709.22	709.22	5984607	0.999915	709.16	709.16	1	5.9841e+06	2.99205e+06	2.99205e+06	0	50	0.5	50	0.5
1555	Brazil	Ceara	Litoral de Aracati	ITAICABA	24132.1	1996	4	180	16.67	163.33	0	180	16.67	163.33	0	180	180	180	1730788	1	180	180	1	1730788	160290	1.5705e+06	0	9.2611	0.0926111	90.7389	0.907389
1556	Brazil	Ceara	Litoral de Camocim e Acarau	ACARAU	83961.9	1996	4	14.66	14.66	0	0	14.66	14.66	0	0	14.66	14.65	14.65	117158	1	14.65	14.65	1.00068	117238	117238	0	0	100	1	0	0
1557	Brazil	Ceara	Litoral de Camocim e Acarau	BARROQUINHA	37003.1	1996	4	3	1.37	1.63	0	3	1.37	1.63	0	3	3	3	21913.7	1	3	3	1	21913.7	10007.3	11906.5	0	45.6667	0.456667	54.3333	0.543333
1558	Brazil	Ceara	Litoral de Camocim e Acarau	BELA CRUZ	84962.4	1996	4	49.43	22.86	26.57	0	49.43	22.86	26.57	0	49.43	49.42	49.42	392423	1	49.42	49.42	1.0002	392502	181521	210981	0	46.2472	0.462472	53.7528	0.537528
1559	Brazil	Ceara	Litoral de Camocim e Acarau	CAMOCIM	115778	1996	4	333.09	299.17	33.92	0	333.09	299.17	33.92	0	333.09	333.09	333.09	2.45024e+06	1	333.09	333.09	1	2.45024e+06	2.20072e+06	249519	0	89.8166	0.898166	10.1834	0.101834
1560	Brazil	Ceara	Litoral de Camocim e Acarau	CHAVAL	24864.5	1996	4	0	0	0	0	0	0	0	0	0	0	0	0	1	0	0	1	0	0	0	0	-1	-1	-1	-1
1561	Brazil	Ceara	Litoral de Camocim e Acarau	CRUZ	32791.6	1996	4	19.99	19.99	0	0	19.99	19.99	0	0	19.99	19.99	19.99	156906	1	19.99	19.99	1	156906	156906	0	0	100	1	0	0
1562	Brazil	Ceara	Litoral de Camocim e Acarau	GRANJA	270278	1996	4	6	3.2	2.8	0	6	3.2	2.8	0	6	6	6	47927.2	1	6	6	1	47927.2	25561.2	22366	0	53.3333	0.533333	46.6667	0.466667
1563	Brazil	Ceara	Litoral de Camocim e Acarau	ITAREMA	73733.3	1996	4	953.85	953.85	0	0	953.85	953.85	0	0	953.85	953.85	953.85	7.48877e+06	1	953.85	953.85	1	7.48877e+06	7.48877e+06	0	0	100	1	0	0
1564	Brazil	Ceara	Litoral de Camocim e Acarau	JIJOCA DE JERICOACOARA	19805.4	1996	4	0	0	0	0	0	0	0	0	0	0	0	0	1	0	0	1	0	0	0	0	-1	-1	-1	-1
1565	Brazil	Ceara	Litoral de Camocim e Acarau	MARCO	58050.8	1996	4	13.32	8.22	5.1	0	13.32	8.22	5.1	0	13.32	13.31	13.31	115669	1	13.31	13.31	1.00075	115756	71434.9	44320.9	0	61.7117	0.617117	38.2883	0.382883
1566	Brazil	Ceara	Litoral de Camocim e Acarau	MARTINOPOLE	26580.7	1996	4	74.95	15	59.95	0	74.95	15	59.95	0	74.95	74.95	74.95	560026	1	74.95	74.95	1	560026	112080	447946	0	20.0133	0.200133	79.9867	0.799867
1567	Brazil	Ceara	Litoral de Camocim e Acarau	MORRINHOS	40415.9	1996	4	80.94	17.29	63.65	0	80.94	17.29	63.65	0	80.94	80.94	80.94	728295	1	80.94	80.94	1	728295	155575	572720	0	21.3615	0.213615	78.6385	0.786385
1568	Brazil	Ceara	Medio Curu	APUIARES	56820.9	1996	4	332.19	0	332.19	0	332.19	0	332.19	0	332.19	332.02	332.02	2.74348e+06	1	332.02	332.02	1.00051	2.74488e+06	0	2.74488e+06	0	0	0	100	1
1569	Brazil	Ceara	Medio Curu	GENERAL SAMPAIO	18448	1996	4	71.37	0	71.37	0	71.37	0	71.37	0	71.37	71.37	71.37	631906	1	71.37	71.37	1	631906	0	631906	0	0	0	100	1
1570	Brazil	Ceara	Medio Curu	PENTECOSTE	135323	1996	4	858.59	2	856.59	0	858.59	2	856.59	0	858.59	855.99	855.99	6059514	1	855.99	855.99	1.00304	6.07792e+06	14157.9	6.06376e+06	0	0.2329	0.0023294	99.7671	0.997671
1571	Brazil	Ceara	Medio Curu	SAO LUIS DO CURU	12589.8	1996	4	676.07	0	676.07	0	676.07	0	676.07	0	676.07	676.07	676.07	5.27996e+06	1	676.07	676.07	1	5.27996e+06	0	5.27996e+06	0	0	0	100	1
1572	Brazil	Ceara	Medio Curu	TEJUCUOCA	80273.4	1996	4	33.64	0	33.64	0	33.64	0	33.64	0	33.64	33.64	33.64	276706	1	33.64	33.64	1	276706	0	276706	0	0	0	100	1
1573	Brazil	Ceara	Medio Jaguaribe	JAGUARETAMA	186957	1996	4	645.12	5.57	639.55	0	645.12	5.57	639.55	0	645.12	641.17	641.17	5352572	1	641.17	641.17	1.00616	5.38555e+06	46499.1	5.33905e+06	0	0.8634	0.00863405	99.1366	0.991366
1574	Brazil	Ceara	Medio Jaguaribe	JAGUARIBE	182060	1996	4	1828.29	75.16	1753.13	0	1828.29	75.16	1753.13	0	1828.29	1815.65	1815.65	14978343	1	1815.65	1815.65	1.00696	1.50826e+07	620038	1.44626e+07	0	4.1109	0.0411095	95.8891	0.958891
1575	Brazil	Ceara	Medio Jaguaribe	JAGUARIBARA	59710.4	1996	4	343.1	34.31	308.79	0	343.1	34.31	308.79	0	343.1	340.56	340.56	2.63046e+06	1	340.56	340.56	1.00746	2.65008e+06	265008	2.38507e+06	0	10	0.1	90	0.9
1576	Brazil	Ceara	Meruoca	ALCANTARAS	13332.5	1996	4	0	0	0	0	0	0	0	0	0	0	0	0	1	0	0	1	0	0	0	0	-1	-1	-1	-1
1577	Brazil	Ceara	Meruoca	MERUOCA	15603.8	1996	4	38.11	0	38.11	0	38.11	0	38.11	0	38.11	38.11	38.11	305687	1	38.11	38.11	1	305687	0	305687	0	0	0	100	1
1578	Brazil	Ceara	Pacajus	HORIZONTE	19063.6	1996	4	119.81	89.91	29.9	0	119.81	89.91	29.9	0	119.81	119.81	119.81	970918	1	119.81	119.81	1	970918	728614	242304	0	75.0438	0.750438	24.9562	0.249562
1579	Brazil	Ceara	Pacajus	PACAJUS	24224.7	1996	4	181.17	90.58	90.59	0	181.17	90.58	90.59	0	181.17	181.17	181.17	1.54706e+06	1	181.17	181.17	1	1.54706e+06	773488	773574	0	49.9972	0.499972	50.0028	0.500028
1580	Brazil	Ceara	Santa Quiteria	CATUNDA	80802.9	1996	4	23.65	0	23.65	0	23.65	0	23.65	0	23.65	23.65	23.65	192102	1	23.65	23.65	1	192102	0	192102	0	0	0	100	1
1581	Brazil	Ceara	Santa Quiteria	HIDROLANDIA	97837.5	1996	4	227.84	4	223.84	0	227.84	4	223.84	0	227.84	225.78	225.78	1.90782e+06	1	225.78	225.78	1.00912	1.92523e+06	33799.6	1.89143e+06	0	1.7556	0.0175562	98.2444	0.982444
1582	Brazil	Ceara	Santa Quiteria	SANTA QUITERIA	427245	1996	4	451.02	2	449.02	0	451.02	2	449.02	0	451.02	450.87	450.87	4101195	1	450.87	450.87	1.00033	4.10256e+06	18192.4	4.08437e+06	0	0.4434	0.00443439	99.5566	0.995566
1583	Brazil	Ceara	Serra do Pereiro	ERERE	32244.3	1996	4	26.66	0	26.66	0	26.66	0	26.66	0	26.8	26.8	26.8	240898	0.994776	26.66	26.66	1	239640	0	239640	0	0	0	100	1
1584	Brazil	Ceara	Serra do Pereiro	IRACEMA	77039.3	1996	4	232.9	2	230.9	0	232.9	2	230.9	0	232.9	230.85	230.85	1.79102e+06	1	230.85	230.85	1.00888	1.80692e+06	15516.7	1.79141e+06	0	0.8587	0.00858738	99.1413	0.991413
1585	Brazil	Ceara	Serra do Pereiro	PEREIRO	42142.2	1996	4	168.76	0	168.76	0	168.76	0	168.76	0	169.19	169.04	169.04	1.4852e+06	0.997458	168.61	168.61	1.00089	1.48274e+06	0	1.48274e+06	0	0	0	100	1
1586	Brazil	Ceara	Serra do Pereiro	POTIRETAMA	49424.8	1996	4	21.05	12.09	8.96	0	21.05	12.09	8.96	0	21.09	21.09	21.09	193599	0.998103	21.05	21.05	1	193231	110982	82249.6	0	57.4347	0.574347	42.5653	0.425653
1587	Brazil	Ceara	Sertao de Crateus	ARARENDA	35520.9	1996	4	72.93	0.38	72.55	0	72.93	0.38	72.55	0	72.93	72.93	72.93	733411	1	72.93	72.93	1	733411	3821.42	729589	0	0.521	0.00521048	99.479	0.99479
1588	Brazil	Ceara	Sertao de Crateus	CRATEUS	280116	1996	4	261.64	41.68	219.96	0	261.64	41.68	219.96	0	261.64	260.22	260.22	1.86302e+06	1	260.22	260.22	1.00546	1.87318e+06	298403	1.57478e+06	0	15.9303	0.159303	84.0697	0.840697
1589	Brazil	Ceara	Sertao de Crateus	INDEPENDENCIA	317673	1996	4	132.84	4	128.84	0	132.84	4	128.84	0	132.84	132.38	132.38	1.0977e+06	1	132.38	132.38	1.00347	1.10151e+06	33168.1	1.06834e+06	0	3.0111	0.0301114	96.9889	0.969889
1590	Brazil	Ceara	Sertao de Crateus	IPAPORANGA	64646	1996	4	0	0	0	0	0	0	0	0	0	0	0	0	1	0	0	1	0	0	0	0	-1	-1	-1	-1
1591	Brazil	Ceara	Sertao de Crateus	MONSENHOR TABOSA	87858.8	1996	4	6.66	0	6.66	0	6.66	0	6.66	0	6.66	6.65	6.65	61089.4	1	6.65	6.65	1.0015	61181.3	0	61181.3	0	0	0	100	1
1592	Brazil	Ceara	Sertao de Crateus	NOVA RUSSAS	74207.9	1996	4	133.34	4	129.34	0	133.34	4	129.34	0	133.34	133.08	133.08	1.27438e+06	1	133.08	133.08	1.00195	1.27687e+06	38304.1	1.23856e+06	0	2.9999	0.0299985	97.0001	0.970001
1593	Brazil	Ceara	Sertao de Crateus	NOVO ORIENTE	95322.8	1996	4	164.1	10.94	153.16	0	164.1	10.94	153.16	0	164.1	164.1	164.1	1.5135e+06	1	164.1	164.1	1	1.5135e+06	100900	1.4126e+06	0	6.6667	0.0666667	93.3333	0.933333
1594	Brazil	Ceara	Sertao de Crateus	QUITERIANOPOLIS	107056	1996	4	49.07	6.72	42.35	0	49.07	6.72	42.35	0	49.07	49.06	49.06	438225	1	49.06	49.06	1.0002	438314	60025.9	378289	0	13.6947	0.136947	86.3053	0.863053
1595	Brazil	Ceara	Sertao de Crateus	TAMBORIL	204499	1996	4	32.64	0	32.64	0	32.64	0	32.64	0	32.64	32.64	32.64	263362	1	32.64	32.64	1	263362	0	263362	0	0	0	100	1
1596	Brazil	Ceara	Sertao de Inhamuns	AIUABA	246842	1996	4	9.83	0.31	9.52	0	9.83	0.31	9.52	0	9.83	9.81	9.81	104440	1	9.81	9.81	1.00204	104653	3300.34	101352	0	3.1536	0.0315361	96.8464	0.968464
1597	Brazil	Ceara	Sertao de Inhamuns	ARNEIROZ	94265.5	1996	4	8.39	0	8.39	0	8.39	0	8.39	0	8.39	8.38	8.38	82420.8	1	8.38	8.38	1.00119	82519.2	0	82519.2	0	0	0	100	1
1598	Brazil	Ceara	Sertao de Inhamuns	CATARINA	57934.4	1996	4	25.3	0	25.3	0	25.3	0	25.3	0	25.3	25.3	25.3	239703	1	25.3	25.3	1	239703	0	239703	0	0	0	100	1
1599	Brazil	Ceara	Sertao de Inhamuns	PARAMBU	243638	1996	4	35.31	5.87	29.44	0	35.31	5.87	29.44	0	35.31	35.3	35.3	366970	1	35.3	35.3	1.00028	367074	61023.1	306051	0	16.6242	0.166242	83.3758	0.833758
1600	Brazil	Ceara	Sertao de Inhamuns	SABOEIRO	135622	1996	4	129.46	0	129.46	0	129.46	0	129.46	0	129.46	129.46	129.46	1.09149e+06	1	129.46	129.46	1	1.09149e+06	0	1.09149e+06	0	0	0	100	1
1601	Brazil	Ceara	Sertao de Inhamuns	TAUA	395895	1996	4	567.87	20	547.87	0	567.87	20	547.87	0	567.87	562.43	562.43	4.78216e+06	1	562.43	562.43	1.00967	4.82841e+06	170053	4.65836e+06	0	3.5219	0.0352193	96.4781	0.964781
1602	Brazil	Ceara	Sertao de Quixeramobim	BANABUIU	122548	1996	4	1047.21	47.6	999.61	0	1047.21	47.6	999.61	0	1047.21	1036.31	1036.31	7.5097e+06	1	1036.31	1036.31	1.01052	7.58869e+06	344937	7.24375e+06	0	4.5454	0.0454541	95.4546	0.954546
1603	Brazil	Ceara	Sertao de Quixeramobim	BOA VIAGEM	273697	1996	4	611.67	0	611.67	0	611.67	0	611.67	0	611.67	611.61	611.61	5491625	1	611.61	611.61	1.0001	5.49216e+06	0	5.49216e+06	0	0	0	100	1
1604	Brazil	Ceara	Sertao de Quixeramobim	CHORO	79606.7	1996	4	110.65	0	110.65	0	110.65	0	110.65	0	110.65	110.07	110.07	829793	1	110.07	110.07	1.00527	834166	0	834166	0	0	0	100	1
1605	Brazil	Ceara	Sertao de Quixeramobim	IBARETAMA	82207.2	1996	4	88.47	0	88.47	0	88.47	0	88.47	0	88.47	88.26	88.26	768171	1	88.26	88.26	1.00238	769999	0	769999	0	0	0	100	1
1606	Brazil	Ceara	Sertao de Quixeramobim	MADALENA	110981	1996	4	194.09	0	194.09	0	194.09	0	194.09	0	194.09	193.05	193.05	1.68578e+06	1	193.05	193.05	1.00539	1.69486e+06	0	1.69486e+06	0	0	0	100	1
1607	Brazil	Ceara	Sertao de Quixeramobim	QUIXADA	205904	1996	4	1189.79	13.06	1176.73	0	1189.79	13.06	1176.73	0	1189.79	1187.59	1187.59	10292996	1	1187.59	1187.59	1.00185	1.03121e+07	113193	1.01989e+07	0	1.0977	0.0109767	98.9023	0.989023
1608	Brazil	Ceara	Sertao de Quixeramobim	QUIXERAMOBIM	327544	1996	4	2252.54	0	2252.54	0	2252.54	0	2252.54	0	2252.54	2227.44	2227.44	16686611	1	2227.44	2227.44	1.01127	1.68746e+07	0	1.68746e+07	0	0	0	100	1
1609	Brazil	Ceara	Sertao de Senador Pompeu	ACOPIARA	229678	1996	4	433.86	0	433.86	0	433.86	0	433.86	0	433.86	432.04	432.04	3.39334e+06	1	432.04	432.04	1.00421	3.40763e+06	0	3.40763e+06	0	0	0	100	1
1610	Brazil	Ceara	Sertao de Senador Pompeu	DEPUTADO IRAPUAN PINHEIRO	51045.7	1996	4	186.49	0	186.49	0	186.49	0	186.49	0	186.49	186.49	186.49	1.55195e+06	1	186.49	186.49	1	1.55195e+06	0	1.55195e+06	0	0	0	100	1
1611	Brazil	Ceara	Sertao de Senador Pompeu	MILHA	52625.4	1996	4	17.74	0	17.74	0	17.74	0	17.74	0	17.74	17.73	17.73	166023	1	17.73	17.73	1.00056	166116	0	166116	0	0	0	100	1
1612	Brazil	Ceara	Sertao de Senador Pompeu	MOMBACA	211200	1996	4	324.17	0	324.17	0	324.17	0	324.17	0	324.17	324.16	324.16	3072957	1	324.16	324.16	1.00003	3.07305e+06	0	3.07305e+06	0	0	0	100	1
1613	Brazil	Ceara	Sertao de Senador Pompeu	PEDRA BRANCA	129098	1996	4	84.43	0	84.43	0	84.43	0	84.43	0	84.43	84.43	84.43	718931	1	84.43	84.43	1	718931	0	718931	0	0	0	100	1
1614	Brazil	Ceara	Sertao de Senador Pompeu	PIQUET CARNEIRO	58034.5	1996	4	41.38	0	41.38	0	41.38	0	41.38	0	41.38	41.38	41.38	385693	1	41.38	41.38	1	385693	0	385693	0	0	0	100	1
1615	Brazil	Ceara	Sertao de Senador Pompeu	SENADOR POMPEU	104325	1996	4	532.94	0	532.94	0	532.94	0	532.94	0	532.94	532.89	532.89	4486570	1	532.89	532.89	1.00009	4.48699e+06	0	4.48699e+06	0	0	0	100	1
1616	Brazil	Ceara	Sertao de Senador Pompeu	SOLONOPOLE	144030	1996	4	538.17	1.68	536.49	0	538.17	1.68	536.49	0	538.17	534.5	534.5	4267900	1	534.5	534.5	1.00687	4.2972e+06	13414.5	4.28379e+06	0	0.3122	0.00312169	99.6878	0.996878
1617	Brazil	Ceara	Sobral	CARIRE	71229.3	1996	4	338.84	0	338.84	0	338.84	0	338.84	0	338.84	335.25	335.25	2541465	1	335.25	335.25	1.01071	2.56868e+06	0	2.56868e+06	0	0	0	100	1
1618	Brazil	Ceara	Sobral	FORQUILHA	54488.6	1996	4	143.05	0	143.05	0	143.05	0	143.05	0	143.05	142.05	142.05	1.14526e+06	1	142.05	142.05	1.00704	1.15332e+06	0	1.15332e+06	0	0	0	100	1
1619	Brazil	Ceara	Sobral	GRACA	26128.2	1996	4	2	1	1	0	2	1	1	0	2	2	2	17265.2	1	2	2	1	17265.2	8632.6	8632.6	0	50	0.5	50	0.5
1620	Brazil	Ceara	Sobral	GROAIRAS	15580.1	1996	4	98.93	0	98.93	0	98.93	0	98.93	0	98.93	98.93	98.93	923159	1	98.93	98.93	1	923159	0	923159	0	0	0	100	1
1621	Brazil	Ceara	Sobral	IRAUCUBA	138408	1996	4	121.91	0	121.91	0	121.91	0	121.91	0	121.91	121.91	121.91	1.01792e+06	1	121.91	121.91	1	1.01792e+06	0	1.01792e+06	0	0	0	100	1
1622	Brazil	Ceara	Sobral	MASSAPE	53481.5	1996	4	202.92	10.93	191.99	0	202.92	10.93	191.99	0	202.92	202.92	202.92	1823440	1	202.92	202.92	1	1823440	98217	1.72522e+06	0	5.3864	0.0538636	94.6136	0.946136
1623	Brazil	Ceara	Sobral	MIRAIMA	76642.5	1996	4	33.64	0	33.64	0	33.64	0	33.64	0	33.64	33.64	33.64	267482	1	33.64	33.64	1	267482	0	267482	0	0	0	100	1
1624	Brazil	Ceara	Sobral	MUCAMBO	24050.5	1996	4	14.26	0	14.26	0	14.26	0	14.26	0	14.26	14.26	14.26	126378	1	14.26	14.26	1	126378	0	126378	0	0	0	100	1
1625	Brazil	Ceara	Sobral	PACUJA	6619.43	1996	4	6.66	1.54	5.12	0	6.66	1.54	5.12	0	6.66	6.66	6.66	61178.5	1	6.66	6.66	1	61178.5	14146.4	47032.1	0	23.1231	0.231231	76.8769	0.768769
1626	Brazil	Ceara	Sobral	SANTANA DO ACARAU	101727	1996	4	499.94	57.8	442.14	0	499.94	57.8	442.14	0	499.94	499.94	499.94	4548063	1	499.94	499.94	1	4548063	525819	4.02224e+06	0	11.5614	0.115614	88.4386	0.884386
1627	Brazil	Ceara	Sobral	SENADOR SA	43147.5	1996	4	15.66	0.89	14.77	0	15.66	0.89	14.77	0	15.66	15.66	15.66	139215	1	15.66	15.66	1	139215	7911.97	131303	0	5.6833	0.0568327	94.3167	0.943167
1628	Brazil	Ceara	Sobral	SOBRAL	212979	1996	4	1044.14	4	1040.14	0	1044.14	4	1040.14	0	1044.14	1033.96	1033.96	7652000	1	1033.96	1033.96	1.00985	7.72734e+06	29602.7	7.69774e+06	0	0.3831	0.0038309	99.6169	0.996169
1629	Brazil	Ceara	Uruburetama	ITAPAGE	39728.2	1996	4	282.83	0	282.83	0	282.83	0	282.83	0	282.83	282.83	282.83	1.95347e+06	1	282.83	282.83	1	1.95347e+06	0	1.95347e+06	0	0	0	100	1
1630	Brazil	Ceara	Uruburetama	TURURU	20462.2	1996	4	42.97	13.78	29.19	0	42.97	13.78	29.19	0	42.97	42.97	42.97	349205	1	42.97	42.97	1	349205	111986	237219	0	32.0689	0.320689	67.9311	0.679311
1631	Brazil	Ceara	Uruburetama	UMIRIM	32111	1996	4	473.37	0	473.37	0	473.37	0	473.37	0	473.37	470.82	470.82	3190843	1	470.82	470.82	1.00542	3.20812e+06	0	3.20812e+06	0	0	0	100	1
1632	Brazil	Ceara	Uruburetama	URUBURETAMA	12553	1996	4	482.22	0	482.22	0	482.22	0	482.22	0	482.22	482.22	482.22	3.38863e+06	1	482.22	482.22	1	3.38863e+06	0	3.38863e+06	0	0	0	100	1
1633	Brazil	Ceara	Varzea Alegre	ANTONINA DO NORTE	25152.8	1996	4	7.23	0	7.23	0	7.23	0	7.23	0	7.23	7.23	7.23	76371.5	1	7.23	7.23	1	76371.5	0	76371.5	0	0	0	100	1
1634	Brazil	Ceara	Varzea Alegre	CARIUS	105902	1996	4	286.5	5.56	280.94	0	286.5	5.56	280.94	0	286.5	286.5	286.5	2.48591e+06	1	286.5	286.5	1	2.48591e+06	48243.1	2.43766e+06	0	1.9407	0.0194066	98.0593	0.980593
1635	Brazil	Ceara	Varzea Alegre	JUCAS	93873.7	1996	4	172.45	17.25	155.2	0	172.45	17.25	155.2	0	172.45	172.26	172.26	1.43021e+06	1	172.26	172.26	1.0011	1.43179e+06	143220	1.28857e+06	0	10.0029	0.100029	89.9971	0.899971
1636	Brazil	Ceara	Varzea Alegre	TARRAFAS	45192.2	1996	4	5.24	0	5.24	0	5.24	0	5.24	0	5.24	5.24	5.24	53611.2	1	5.24	5.24	1	53611.2	0	53611.2	0	0	0	100	1
1637	Brazil	Ceara	Varzea Alegre	VARZEA ALEGRE	81123.9	1996	4	227.62	0	227.62	0	227.62	0	227.62	0	227.62	227.62	227.62	2.04524e+06	1	227.62	227.62	1	2.04524e+06	0	2.04524e+06	0	0	0	100	1
1638	Brazil	Distrito Federal	Distrito Federal	BRASILIA	582121	1996	4	10998	0	10998	0	10998	0	10998	0	11227.2	12237.8	10984.4	17400970	0.979587	11988	10760.2	1	1.70458e+07	0	1.70458e+07	0	0	0	100	1
1639	Brazil	Espirito Santo	Alegre	ALEGRE	77909.2	1996	4	387.45	0	387.45	0	387.45	0	387.45	0	387.45	404.56	382.85	1.42025e+06	1	404.56	382.85	1	1.42025e+06	0	1.42025e+06	0	0	0	100	1
1640	Brazil	Espirito Santo	Alegre	DIVINO DE SAO LOURENCO	17621.8	1996	4	39.54	0	39.54	0	39.54	0	39.54	0	39.54	42.22	39.54	125843	1	42.22	39.54	1	125843	0	125843	0	0	0	100	1
1641	Brazil	Espirito Santo	Alegre	DORES DO RIO PRETO	15238.4	1996	4	76.71	0	76.71	0	76.71	0	76.71	0	76.71	83.59	76.71	239447	1	83.59	76.71	1	239447	0	239447	0	0	0	100	1
1642	Brazil	Espirito Santo	Alegre	GUACUI	46815.5	1996	4	35.49	0	35.49	0	35.49	0	35.49	0	35.49	37.88	35.49	122900	1	37.88	35.49	1	122900	0	122900	0	0	0	100	1
1643	Brazil	Espirito Santo	Alegre	IBATIBA	22720.2	1996	4	80.63	0	80.63	0	80.63	0	80.63	0	80.63	83.58	80.63	283420	1	83.58	80.63	1	283420	0	283420	0	0	0	100	1
1644	Brazil	Espirito Santo	Alegre	IBITIRAMA	32614	1996	4	38.37	0	38.37	0	38.37	0	38.37	0	38.37	40.36	38.37	132391	1	40.36	38.37	1	132391	0	132391	0	0	0	100	1
1645	Brazil	Espirito Santo	Alegre	IRUPI	20778.8	1996	4	5.72	0	5.72	0	5.72	0	5.72	0	5.72	6.05	5.72	22675.6	1	6.05	5.72	1	22675.6	0	22675.6	0	0	0	100	1
1646	Brazil	Espirito Santo	Alegre	IUNA	45504.2	1996	4	104.38	0	104.38	0	104.38	0	104.38	0	104.38	108.17	104.38	345704	1	108.17	104.38	1	345704	0	345704	0	0	0	100	1
1647	Brazil	Espirito Santo	Alegre	MUNIZ FREIRE	68461.8	1996	4	681.32	0	681.32	0	681.32	0	681.32	0	681.32	688.43	658.86	2614022	1	688.43	658.86	1	2614022	0	2614022	0	0	0	100	1
1648	Brazil	Espirito Santo	Alfonso Claudio	AFONSO CLAUDIO	130019	1996	4	2186.88	0	2186.88	0	2186.88	0	2186.88	0	2186.88	2280.16	2156.54	7.75253e+06	1	2280.16	2156.54	1	7.75253e+06	0	7.75253e+06	0	0	0	100	1
1649	Brazil	Espirito Santo	Alfonso Claudio	CONCEICAO DO CASTELO	36162.6	1996	4	240.34	0	240.34	0	240.34	0	240.34	0	240.34	260.6	240.34	869249	1	260.6	240.34	1	869249	0	869249	0	0	0	100	1
1650	Brazil	Espirito Santo	Alfonso Claudio	DOMINGOS MARTINS	124089	1996	4	2183.96	0	2183.96	0	2183.96	0	2183.96	0	2183.96	2234.67	2010.41	6.31832e+06	1	2234.67	2010.41	1	6.31832e+06	0	6.31832e+06	0	0	0	100	1
1651	Brazil	Espirito Santo	Alfonso Claudio	LARANJA DA TERRA	44903.4	1996	4	3966.08	2	3964.08	0	3966.08	2	3964.08	0	3966.08	3578.29	3459.07	10675265	1	3578.29	3459.07	1.10837	1.18322e+07	5966.69	1.18262e+07	0	0.0504	0.000504276	99.9496	0.999496
1652	Brazil	Espirito Santo	Alfonso Claudio	MARECHAL FLORIANO	28775	1996	4	670.53	0	670.53	0	670.53	0	670.53	0	670.53	702.52	666.06	2.59776e+06	1	702.52	666.06	1	2.59776e+06	0	2.59776e+06	0	0	0	100	1
1653	Brazil	Espirito Santo	Alfonso Claudio	VENDA NOVA DO IMIGRANTE	18852.8	1996	4	1378.92	0	1378.92	0	1378.92	0	1378.92	0	1378.92	1492.55	1362.69	4.44374e+06	1	1492.55	1362.69	1	4.44374e+06	0	4.44374e+06	0	0	0	100	1
1654	Brazil	Espirito Santo	Barra de Sao Francisco	AGUA DOCE DO NORTE	48922	1996	4	528.22	0	528.22	0	528.22	0	528.22	0	528.22	514.11	505.02	1.732e+06	1	514.11	505.02	1.02745	1.77953e+06	0	1.77953e+06	0	0	0	100	1
1655	Brazil	Espirito Santo	Barra de Sao Francisco	BARRA DE SAO FRANCISCO	94463.9	1996	4	1597.27	0	1597.27	0	1597.27	0	1597.27	0	1597.27	1602.46	1579.62	5368091	1	1602.46	1579.62	1	5368091	0	5368091	0	0	0	100	1
1656	Brazil	Espirito Santo	Barra de Sao Francisco	ECOPORANGA	229124	1996	4	457.85	5.11	452.74	0	457.85	5.11	452.74	0	457.85	455.74	443.49	1.54291e+06	1	455.74	443.49	1.00463	1.55005e+06	17299.9	1.53275e+06	0	1.1161	0.0111609	98.8839	0.988839
1657	Brazil	Espirito Santo	Barra de Sao Francisco	MANTENOPOLIS	32203.2	1996	4	355.95	0	355.95	0	355.95	0	355.95	0	355.95	361.49	343.81	1173644	1	361.49	343.81	1	1173644	0	1173644	0	0	0	100	1
1658	Brazil	Espirito Santo	Cachoeiro de Itapemirim	APIACA	19425.8	1996	4	80.24	0	80.24	0	80.24	0	80.24	0	80.24	82.01	80.24	249915	1	82.01	80.24	1	249915	0	249915	0	0	0	100	1
1659	Brazil	Espirito Santo	Cachoeiro de Itapemirim	ATILIO VIVACQUA	22714.4	1996	4	147.17	0	147.17	0	147.17	0	147.17	0	147.17	148.79	145.49	516217	1	148.79	145.49	1	516217	0	516217	0	0	0	100	1
1660	Brazil	Espirito Santo	Cachoeiro de Itapemirim	BOM JESUS DO NORTE	8645.8	1996	4	76.94	0	76.94	0	76.94	0	76.94	0	76.95	79.16	76.95	225856	0.99987	79.15	76.94	1	225827	0	225827	0	0	0	100	1
1661	Brazil	Espirito Santo	Cachoeiro de Itapemirim	CACHOEIRO DE ITAPEMIRIM	89005.1	1996	4	1814.32	0	1814.32	0	1814.32	0	1814.32	0	1814.32	1759.16	1713.83	6.6818e+06	1	1759.16	1713.83	1.03136	6.89132e+06	0	6.89132e+06	0	0	0	100	1
1662	Brazil	Espirito Santo	Cachoeiro de Itapemirim	CASTELO	66378.9	1996	4	1121.95	0	1121.95	0	1121.95	0	1121.95	0	1121.95	1197.53	1119.36	3.55057e+06	1	1197.53	1119.36	1	3.55057e+06	0	3.55057e+06	0	0	0	100	1
1663	Brazil	Espirito Santo	Cachoeiro de Itapemirim	JERONIMO MONTEIRO	16311.3	1996	4	308.3	0	308.3	0	308.3	0	308.3	0	308.3	325.78	305.6	1116419	1	325.78	305.6	1	1116419	0	1116419	0	0	0	100	1
1664	Brazil	Espirito Santo	Cachoeiro de Itapemirim	MIMOSO DO SUL	88690.3	1996	4	606.1	0	606.1	0	606.1	0	606.1	0	606.13	609.03	596.71	1.65831e+06	0.999951	609	596.68	1	1.65823e+06	0	1.65823e+06	0	0	0	100	1
1665	Brazil	Espirito Santo	Cachoeiro de Itapemirim	MUQUI	31060.8	1996	4	185.15	0	185.15	0	185.15	0	185.15	0	185.15	196.49	185.15	663546	1	196.49	185.15	1	663546	0	663546	0	0	0	100	1
1666	Brazil	Espirito Santo	Cachoeiro de Itapemirim	SAO JOSE DO CALCADO	27933.5	1996	4	176.49	0	176.49	0	176.49	0	176.49	0	176.51	183.02	176.51	537422	0.999887	183	176.49	1	537361	0	537361	0	0	0	100	1
1667	Brazil	Espirito Santo	Cachoeiro de Itapemirim	VARGEM ALTA	40771.4	1996	4	676.84	0	676.84	0	676.84	0	676.84	0	676.84	689.14	666.72	2.31648e+06	1	689.14	666.72	1	2.31648e+06	0	2.31648e+06	0	0	0	100	1
1668	Brazil	Espirito Santo	Colatina	ALTO RIO NOVO	23267	1996	4	47.32	0	47.32	0	47.32	0	47.32	0	47.32	47.83	47.32	133964	1	47.83	47.32	1	133964	0	133964	0	0	0	100	1
1669	Brazil	Espirito Santo	Colatina	BAIXO GUANDU	92963.8	1996	4	1298.66	0	1298.66	0	1298.66	0	1298.66	0	1298.66	1279.59	1214.83	4496828	1	1279.59	1214.83	1.0149	4.56385e+06	0	4.56385e+06	0	0	0	100	1
1670	Brazil	Espirito Santo	Colatina	COLATINA	180277	1996	4	6534.7	2	6532.7	0	6534.7	2	6532.7	0	6534.7	6174.85	6094.91	18932666	1	6174.85	6094.91	1.05828	2.0036e+07	6132.19	2.00299e+07	0	0.0306	0.000306058	99.9694	0.999694
1671	Brazil	Espirito Santo	Colatina	MARILANDIA	30622.5	1996	4	2092.46	0	2092.46	0	2092.46	0	2092.46	0	2092.46	2007.82	1982.86	5794952	1	2007.82	1982.86	1.04216	6.03924e+06	0	6.03924e+06	0	0	0	100	1
1672	Brazil	Espirito Santo	Colatina	PANCAS	82825	1996	4	506.56	0	506.56	0	506.56	0	506.56	0	506.56	515.66	506.39	1.41162e+06	1	515.66	506.39	1	1.41162e+06	0	1.41162e+06	0	0	0	100	1
1673	Brazil	Espirito Santo	Colatina	SAO DOMINGOS DO NORTE	29822.1	1996	4	669.54	0	669.54	0	669.54	0	669.54	0	669.54	676.07	662.68	1.79975e+06	1	676.07	662.68	1	1.79975e+06	0	1.79975e+06	0	0	0	100	1
1674	Brazil	Espirito Santo	Guarapari	ALFREDO CHAVES	61912.4	1996	4	987.08	0	987.08	0	987.08	0	987.08	0	987.08	942.85	931.21	2.55564e+06	1	942.85	931.21	1.04691	2.67553e+06	0	2.67553e+06	0	0	0	100	1
1675	Brazil	Espirito Santo	Guarapari	ANCHIETA	41997.6	1996	4	254.44	0	254.44	0	254.44	0	254.44	0	254.44	260.06	254.29	862494	1	260.06	254.29	1	862494	0	862494	0	0	0	100	1
1676	Brazil	Espirito Santo	Guarapari	GUARAPARI	58312.6	1996	4	101.8	0	101.8	0	101.8	0	101.8	0	101.8	105.06	101.8	325768	1	105.06	101.8	1	325768	0	325768	0	0	0	100	1
1677	Brazil	Espirito Santo	Guarapari	ICONHA	20078.9	1996	4	29.53	0	29.53	0	29.53	0	29.53	0	29.53	30.25	29.53	106927	1	30.25	29.53	1	106927	0	106927	0	0	0	100	1
1678	Brazil	Espirito Santo	Guarapari	PIUMA	7301.05	1996	4	490.75	0	490.75	0	490.75	0	490.75	0	490.75	500.51	490.65	1.70829e+06	1	500.51	490.65	1	1.70829e+06	0	1.70829e+06	0	0	0	100	1
1679	Brazil	Espirito Santo	Guarapari	RIO NOVO DO SUL	20757.3	1996	4	71.05	0	71.05	0	71.05	0	71.05	0	71.05	72.76	71.05	285043	1	72.76	71.05	1	285043	0	285043	0	0	0	100	1
1680	Brazil	Espirito Santo	Itapemirim	ITAPEMIRIM	69196.2	1996	4	601	0	601	0	601	0	601	0	601	610.22	599.89	1.84174e+06	1	610.22	599.89	1	1.84174e+06	0	1.84174e+06	0	0	0	100	1
1681	Brazil	Espirito Santo	Itapemirim	PRESIDENTE KENNEDY	58964.6	1996	4	440.18	0	440.18	0	440.18	0	440.18	0	440.18	439	423.44	1.21832e+06	1	439	423.44	1.00269	1.22159e+06	0	1.22159e+06	0	0	0	100	1
1682	Brazil	Espirito Santo	Linhares	ARACRUZ	141798	1996	4	2800.25	1205.5	1594.75	0	2800.25	1205.5	1594.75	0	2800.25	2623.87	2542.66	6.46689e+06	1	2623.87	2542.66	1.06722	6.9016e+06	2.97112e+06	3.93048e+06	0	43.0497	0.430497	56.9503	0.569503
1683	Brazil	Espirito Santo	Linhares	FUNDAO	27132	1996	4	107.81	35.94	71.87	0	107.81	35.94	71.87	0	107.81	97.47	96.19	273090	1	97.47	96.19	1.10608	302060	100696	201364	0	33.3364	0.333364	66.6636	0.666636
1684	Brazil	Espirito Santo	Linhares	IBIRACU	20136.3	1996	4	56.11	0.97	55.14	0	56.11	0.97	55.14	0	56.11	58.15	56.11	149299	1	58.15	56.11	1	149299	2581	146718	0	1.7287	0.0172875	98.2713	0.982713
1685	Brazil	Espirito Santo	Linhares	JOAO NEIVA	27271.1	1996	4	508.83	0	508.83	0	508.83	0	508.83	0	508.83	483.31	477.16	1432412	1	483.31	477.16	1.0528	1508047	0	1508047	0	0	0	100	1
1686	Brazil	Espirito Santo	Linhares	LINHARES	441151	1996	4	14231.9	4324.35	9907.57	0	14231.9	4324.35	9907.57	0	14231.9	13797.3	13520.6	27395132	1	13797.3	13520.6	1.0315	2.82581e+07	8.5862e+06	1.96719e+07	0	30.3849	0.303849	69.6151	0.696151
1687	Brazil	Espirito Santo	Linhares	RIO BANANAL	69499.1	1996	4	1290.12	162.57	1127.55	0	1290.12	162.57	1127.55	0	1290.12	1283.2	1258.78	2.95431e+06	1	1283.2	1258.78	1.00539	2.97024e+06	374285	2.59596e+06	0	12.6012	0.126012	87.3988	0.873988
1688	Brazil	Espirito Santo	Montanha	MONTANHA	109431	1996	4	1456.94	690.92	766.02	0	1456.94	690.92	766.02	0	1456.94	1442.11	1433.37	4.29917e+06	1	1442.11	1433.37	1.01028	4.34338e+06	2.05975e+06	2.28364e+06	0	47.4227	0.474227	52.5773	0.525773
1689	Brazil	Espirito Santo	Montanha	MUCURICI	100778	1996	4	322.42	93.28	229.14	0	322.42	93.28	229.14	0	322.42	325.4	321.17	756395	1	325.4	321.17	1	756395	218834	537561	0	28.9312	0.289312	71.0688	0.710688
1690	Brazil	Espirito Santo	Montanha	PINHEIROS	88938.6	1996	4	2606.05	1057.06	1548.99	0	2606.05	1057.06	1548.99	0	2606.05	2596.05	2550.05	7.16404e+06	1	2596.05	2550.05	1.00385	7.19163e+06	2.91705e+06	4.27458e+06	0	40.5618	0.405618	59.4382	0.594382
1691	Brazil	Espirito Santo	Nova Venecia	AGUIA BRANCA	45080.9	1996	4	455.55	0	455.55	0	455.55	0	455.55	0	455.55	463.12	455.48	1.40727e+06	1	463.12	455.48	1	1.40727e+06	0	1.40727e+06	0	0	0	100	1
1692	Brazil	Espirito Santo	Nova Venecia	BOA ESPERANCA	39376.5	1996	4	1281.03	448.58	832.45	0	1281.03	448.58	832.45	0	1281.03	1304.81	1279.2	3679185	1	1304.81	1279.2	1	3679185	1.28835e+06	2.39084e+06	0	35.0171	0.350171	64.9829	0.649829
1693	Brazil	Espirito Santo	Nova Venecia	NOVA VENECIA	142842	1996	4	1644.73	16.21	1628.52	0	1644.73	16.21	1628.52	0	1644.73	1615.24	1591.95	4.75939e+06	1	1615.24	1591.95	1.01826	4.84629e+06	47763.6	4.79852e+06	0	0.9856	0.00985572	99.0144	0.990144
1694	Brazil	Espirito Santo	Nova Venecia	SAO GABRIEL DA PALHA	54757.5	1996	4	2523.24	10	2513.24	0	2523.24	10	2513.24	0	2523.24	2521	2496	7094181	1	2521	2496	1.00089	7.10048e+06	28140.3	7.07234e+06	0	0.3963	0.00396316	99.6037	0.996037
1695	Brazil	Espirito Santo	Nova Venecia	VILA PAVAO	43851.1	1996	4	253.29	0	253.29	0	253.29	0	253.29	0	253.29	257.17	252.57	833349	1	257.17	252.57	1	833349	0	833349	0	0	0	100	1
1696	Brazil	Espirito Santo	Santa Teresa	ITAGUACU	53345.4	1996	4	2564.65	0	2564.65	0	2564.65	0	2564.65	0	2564.65	2507.07	2472.7	9049637	1	2507.07	2472.7	1.02297	9.25748e+06	0	9.25748e+06	0	0	0	100	1
1697	Brazil	Espirito Santo	Santa Teresa	ITARANA	29874.2	1996	4	1867.08	0	1867.08	0	1867.08	0	1867.08	0	1867.08	1825.11	1766.86	5.27784e+06	1	1825.11	1766.86	1.023	5.3992e+06	0	5.3992e+06	0	0	0	100	1
1698	Brazil	Espirito Santo	Santa Teresa	SANTA LEOPOLDINA	71353.6	1996	4	900.65	0	900.65	0	900.65	0	900.65	0	900.65	912.9	878.18	2.6817e+06	1	912.9	878.18	1	2.6817e+06	0	2.6817e+06	0	0	0	100	1
1699	Brazil	Espirito Santo	Santa Teresa	SANTA MARIA DE JETIBA	73759.7	1996	4	6326.08	0	6326.08	0	6326.08	0	6326.08	0	6326.08	6700.4	5947.33	21483416	1	6700.4	5947.33	1	21483416	0	21483416	0	0	0	100	1
1700	Brazil	Espirito Santo	Santa Teresa	SANTA TERESA	104294	1996	4	5486.89	0	5486.89	0	5486.89	0	5486.89	0	5486.89	5448.46	5328.95	11766444	1	5448.46	5328.95	1.00705	1.18494e+07	0	1.18494e+07	0	0	0	100	1
1701	Brazil	Espirito Santo	Sao Mateus	CONCEICAO DA BARRA	103996	1996	4	1133.65	566.83	566.82	0	1133.65	566.83	566.82	0	1133.65	1136.39	1116.66	1.97511e+06	1	1136.39	1116.66	1	1.97511e+06	987565	987548	0	50.0004	0.500004	49.9996	0.499996
1702	Brazil	Espirito Santo	Sao Mateus	JAGUARE	71981.8	1996	4	2755.56	924.51	1831.05	0	2755.56	924.51	1831.05	0	2755.56	2705.25	2666.26	6297771	1	2705.25	2666.26	1.0186	6.41489e+06	2.15224e+06	4.26265e+06	0	33.5507	0.335507	66.4493	0.664493
1703	Brazil	Espirito Santo	Sao Mateus	PEDRO CANARIO	58013.4	1996	4	1418.47	709.24	709.23	0	1418.47	709.24	709.23	0	1418.47	1420.51	1395.58	3.07936e+06	1	1420.51	1395.58	1	3.07936e+06	1.53969e+06	1.53967e+06	0	50.0004	0.500004	49.9996	0.499996
1704	Brazil	Espirito Santo	Sao Mateus	SAO MATEUS	232695	1996	4	3521.53	906.21	2615.32	0	3521.53	906.21	2615.32	0	3521.53	3495.91	3463.94	8009293	1	3495.91	3463.94	1.00733	8.06799e+06	2.07617e+06	5.99182e+06	0	25.7334	0.257334	74.2666	0.742666
1705	Brazil	Espirito Santo	Vitoria	CARIACICA	28621.3	1996	4	169.59	0	169.59	0	169.59	0	169.59	0	169.59	158.34	154.65	383454	1	158.34	154.65	1.07105	410699	0	410699	0	0	0	100	1
1706	Brazil	Espirito Santo	Vitoria	SERRA	55217.1	1996	4	922.9	53.25	869.65	0	922.9	53.25	869.65	0	922.9	833.52	829.43	2.24908e+06	1	833.52	829.43	1.10723	2.49025e+06	143684	2.34657e+06	0	5.7699	0.0576986	94.2301	0.942301
1707	Brazil	Espirito Santo	Vitoria	VIANA	29381.1	1996	4	278.94	0	278.94	0	278.94	0	278.94	0	278.94	280.64	272.77	1.06754e+06	1	280.64	272.77	1	1.06754e+06	0	1.06754e+06	0	0	0	100	1
1708	Brazil	Espirito Santo	Vitoria	VILA VELHA	21669.3	1996	4	31.54	0	31.54	0	31.54	0	31.54	0	31.54	31.24	31.2	47079.8	1	31.24	31.2	1.0096	47532	0	47532	0	0	0	100	1
1709	Brazil	Espirito Santo	Vitoria	VITORIA	9228.04	1996	4	0	0	0	0	0	0	0	0	0	0	0	0	1	0	0	1	0	0	0	0	-1	-1	-1	-1
1710	Brazil	Goias	Anapolis	ANAPOLIS	107904	1996	4	4192.3	0	4192.3	0	4192.3	0	4192.3	0	4192.3	1935.87	1895.4	3.14547e+06	1	1935.87	1895.4	2.16559	6.81179e+06	0	6.81179e+06	0	0	0	100	1
1711	Brazil	Goias	Anapolis	ARACU	15554	1996	4	158.13	0	158.13	0	158.13	0	158.13	0	158.13	169.85	147.26	426719	1	169.85	147.26	1	426719	0	426719	0	0	0	100	1
1712	Brazil	Goias	Anapolis	BRAZABRANTES	12299.9	1996	4	94.23	0	94.23	0	94.23	0	94.23	0	94.23	97.66	83.83	238620	1	97.66	83.83	1	238620	0	238620	0	0	0	100	1
1713	Brazil	Goias	Anapolis	CATURAI	20872.6	1996	4	763.56	0	763.56	0	763.56	0	763.56	0	763.56	670.91	476.54	1.45911e+06	1	670.91	476.54	1.1381	1.66061e+06	0	1.66061e+06	0	0	0	100	1
1714	Brazil	Goias	Anapolis	DAMOLANDIA	8440.15	1996	4	298.22	0	298.22	0	298.22	0	298.22	0	298.22	224.79	189.49	474429	1	224.79	189.49	1.32666	629407	0	629407	0	0	0	100	1
1715	Brazil	Goias	Anapolis	HEITORAI	23174.4	1996	4	255.27	0	255.27	0	255.27	0	255.27	0	255.27	260.24	223.3	576294	1	260.24	223.3	1	576294	0	576294	0	0	0	100	1
1716	Brazil	Goias	Anapolis	INHUMAS	61653.1	1996	4	1504.38	0	1504.38	0	1504.38	0	1504.38	0	1504.38	1378.09	1160.92	3440749	1	1378.09	1160.92	1.09164	3.75606e+06	0	3.75606e+06	0	0	0	100	1
1717	Brazil	Goias	Anapolis	ITABERAI	147580	1996	4	2309.31	0	2309.31	0	2309.31	0	2309.31	0	2309.31	2560.05	2159.37	5.72026e+06	1	2560.05	2159.37	1	5.72026e+06	0	5.72026e+06	0	0	0	100	1
1718	Brazil	Goias	Anapolis	ITAGUARI	12664.4	1996	4	6.69	0	6.69	0	6.69	0	6.69	0	6.69	7.5	6.59	18237.6	1	7.5	6.59	1	18237.6	0	18237.6	0	0	0	100	1
1719	Brazil	Goias	Anapolis	ITAGUARU	24127.2	1996	4	116.61	0	116.61	0	116.61	0	116.61	0	116.61	113.81	103.62	287297	1	113.81	103.62	1.0246	294365	0	294365	0	0	0	100	1
1720	Brazil	Goias	Anapolis	ITAUCU	38328.4	1996	4	274.1	0	274.1	0	274.1	0	274.1	0	274.1	257.69	204.04	583175	1	257.69	204.04	1.06368	620312	0	620312	0	0	0	100	1
1721	Brazil	Goias	Anapolis	JARAGUA	189655	1996	4	875.4	0	875.4	0	875.4	0	875.4	0	875.4	800.15	758.4	1.80767e+06	1	800.15	758.4	1.09404	1.97767e+06	0	1.97767e+06	0	0	0	100	1
1722	Brazil	Goias	Anapolis	JESUPOLIS	12187.5	1996	4	23.64	0	23.64	0	23.64	0	23.64	0	23.64	24.93	22.94	63134.9	1	24.93	22.94	1	63134.9	0	63134.9	0	0	0	100	1
1723	Brazil	Goias	Anapolis	NOVA VENEZA	12350.5	1996	4	695.19	0	695.19	0	695.19	0	695.19	0	695.19	441.22	376.98	920297	1	441.22	376.98	1.57561	1.45003e+06	0	1.45003e+06	0	0	0	100	1
1724	Brazil	Goias	Anapolis	OURO VERDE DE GOIAS	21143.1	1996	4	795.74	0	795.74	0	795.74	0	795.74	0	795.74	499.73	469.16	833811	1	499.73	469.16	1.59234	1.32771e+06	0	1.32771e+06	0	0	0	100	1
1725	Brazil	Goias	Anapolis	PETROLINA DE GOIAS	55520.1	1996	4	552.68	0	552.68	0	552.68	0	552.68	0	552.68	482.04	467.65	774834	1	482.04	467.65	1.14654	888381	0	888381	0	0	0	100	1
1726	Brazil	Goias	Anapolis	SANTA ROSA DE GOIAS	17034.9	1996	4	482.45	0	482.45	0	482.45	0	482.45	0	482.45	518.57	461.9	1.12319e+06	1	518.57	461.9	1	1.12319e+06	0	1.12319e+06	0	0	0	100	1
1727	Brazil	Goias	Anapolis	SAO FRANCISCO DE GOIAS	37438	1996	4	327.44	0	327.44	0	327.44	0	327.44	0	327.44	314.73	298.14	643480	1	314.73	298.14	1.04038	669466	0	669466	0	0	0	100	1
1728	Brazil	Goias	Anapolis	TAQUARAL DE GOIAS	21062	1996	4	246.68	0	246.68	0	246.68	0	246.68	0	246.68	277.8	238.56	633397	1	277.8	238.56	1	633397	0	633397	0	0	0	100	1
1729	Brazil	Goias	Anicuns	ADELANDIA	11752.5	1996	4	6.3	0	6.3	0	6.3	0	6.3	0	6.3	6.33	5.78	15316.7	1	6.33	5.78	1	15316.7	0	15316.7	0	0	0	100	1
1730	Brazil	Goias	Anicuns	AMERICANO DO BRASIL	13470.8	1996	4	7.88	0	7.88	0	7.88	0	7.88	0	7.88	8.32	7.34	19407.1	1	8.32	7.34	1	19407.1	0	19407.1	0	0	0	100	1
1731	Brazil	Goias	Anicuns	ANICUNS	96369.7	1996	4	1538.37	0	1538.37	0	1538.37	0	1538.37	0	1538.37	1473.13	1336.92	3.6528e+06	1	1473.13	1336.92	1.04429	3.81457e+06	0	3.81457e+06	0	0	0	100	1
1732	Brazil	Goias	Anicuns	AURILANDIA	56860.7	1996	4	5.03	0	5.03	0	5.03	0	5.03	0	5.03	3.8	3.57	7686.09	1	3.8	3.57	1.32368	10174	0	10174	0	0	0	100	1
1733	Brazil	Goias	Anicuns	AVELINOPOLIS	16293.7	1996	4	95.17	0	95.17	0	95.17	0	95.17	0	95.17	100.07	89.92	259712	1	100.07	89.92	1	259712	0	259712	0	0	0	100	1
1734	Brazil	Goias	Anicuns	BURITI DE GOIAS	19889.6	1996	4	6.3	0	6.3	0	6.3	0	6.3	0	6.3	6.71	6.17	15993.1	1	6.71	6.17	1	15993.1	0	15993.1	0	0	0	100	1
1735	Brazil	Goias	Anicuns	FIRMINOPOLIS	41010.9	1996	4	56.73	0	56.73	0	56.73	0	56.73	0	56.73	58.97	52.33	131160	1	58.97	52.33	1	131160	0	131160	0	0	0	100	1
1736	Brazil	Goias	Anicuns	MOSSAMEDES	68830.6	1996	4	259.61	0	259.61	0	259.61	0	259.61	0	259.61	255.45	224.32	549895	1	255.45	224.32	1.01628	558850	0	558850	0	0	0	100	1
1737	Brazil	Goias	Anicuns	NAZARIO	30405	1996	4	170.13	0	170.13	0	170.13	0	170.13	0	170.13	158.67	136.48	375650	1	158.67	136.48	1.07223	402781	0	402781	0	0	0	100	1
1738	Brazil	Goias	Anicuns	SANCLERLANDIA	49576.2	1996	4	6.84	0	6.84	0	6.84	0	6.84	0	6.84	7.05	6.4	16030.7	1	7.05	6.4	1	16030.7	0	16030.7	0	0	0	100	1
1739	Brazil	Goias	Anicuns	SANTA BARBARA DE GOIAS	14037.5	1996	4	160.1	0	160.1	0	160.1	0	160.1	0	160.1	154.55	126.95	284288	1	154.55	126.95	1.03591	294497	0	294497	0	0	0	100	1
1740	Brazil	Goias	Anicuns	SAO LUIS DE MONTES BELOS	82930.1	1996	4	173.35	0	173.35	0	173.35	0	173.35	0	173.35	169.21	151.12	381473	1	169.21	151.12	1.02447	390806	0	390806	0	0	0	100	1
1741	Brazil	Goias	Anicuns	TURVANIA	47207.3	1996	4	241.64	0	241.64	0	241.64	0	241.64	0	241.64	226.11	201.66	483815	1	226.11	201.66	1.06868	517045	0	517045	0	0	0	100	1
1742	Brazil	Goias	Aragarcas	ARAGARCAS	71274.4	1996	4	0	0	0	0	0	0	0	0	0	0	0	0	1	0	0	1	0	0	0	0	-1	-1	-1	-1
1743	Brazil	Goias	Aragarcas	ARENOPOLIS	107877	1996	4	54.24	0.5	53.74	0	54.24	0.5	53.74	0	54.24	51.48	41.4	103486	1	51.48	41.4	1.05361	109034	1005.11	108029	0	0.9218	0.00921829	99.0782	0.990782
1744	Brazil	Goias	Aragarcas	BALIZA	179071	1996	4	0	0	0	0	0	0	0	0	0	0	0	0	1	0	0	1	0	0	0	0	-1	-1	-1	-1
1745	Brazil	Goias	Aragarcas	BOM JARDIM DE GOIAS	185468	1996	4	199.03	3.99	195.04	0	199.03	3.99	195.04	0	199.03	176.64	162.24	374085	1	176.64	162.24	1.12675	421503	8449.96	413053	0	2.0047	0.0200472	97.9953	0.979953
1746	Brazil	Goias	Aragarcas	DIORAMA	68992.7	1996	4	36.63	4.11	32.52	0	36.63	4.11	32.52	0	36.63	32.5	25.99	63851.1	1	32.5	25.99	1.12708	71965.1	8074.71	63890.4	0	11.2203	0.112203	88.7797	0.887797
1747	Brazil	Goias	Aragarcas	MONTES CLAROS DE GOIAS	291161	1996	4	255.58	45.94	209.64	0	255.58	45.94	209.64	0	255.58	219.83	166.98	417547	1	219.83	166.98	1.16263	485451	87258.9	398192	0	17.9748	0.179748	82.0252	0.820252
1748	Brazil	Goias	Aragarcas	PIRANHAS	205653	1996	4	150.26	6.92	143.34	0	150.26	6.92	143.34	0	150.26	136.56	112.67	253330	1	136.56	112.67	1.10032	278745	12837.2	265908	0	4.6054	0.0460535	95.3946	0.953946
1749	Brazil	Goias	Catalao	ANHANGUERA	5539.01	1996	4	0	0	0	0	0	0	0	0	0	0	0	0	1	0	0	1	0	0	0	0	-1	-1	-1	-1
1750	Brazil	Goias	Catalao	CAMPO ALEGRE DE GOIAS	247337	1996	4	4625.48	0	4625.48	0	4625.48	0	4625.48	0	4625.48	3425.72	2715.58	5223723	1	3425.72	2715.58	1.35022	7.05318e+06	0	7.05318e+06	0	0	0	100	1
1751	Brazil	Goias	Catalao	CATALAO	379147	1996	4	4215.15	0	4215.15	0	4215.15	0	4215.15	0	4215.15	3206.02	2501.59	5.14864e+06	1	3206.02	2501.59	1.31476	6.76923e+06	0	6.76923e+06	0	0	0	100	1
1752	Brazil	Goias	Catalao	CORUMBAIBA	188045	1996	4	13.8	0	13.8	0	13.8	0	13.8	0	13.8	14.2	13.1	34445.1	1	14.2	13.1	1	34445.1	0	34445.1	0	0	0	100	1
1753	Brazil	Goias	Catalao	CUMARI	57456.4	1996	4	25.84	0	25.84	0	25.84	0	25.84	0	25.84	21.04	19.06	48690.4	1	21.04	19.06	1.22814	59798.4	0	59798.4	0	0	0	100	1
1754	Brazil	Goias	Catalao	DAVINOPOLIS	52340.4	1996	4	23.34	0	23.34	0	23.34	0	23.34	0	23.34	19.04	16.51	43247.3	1	19.04	16.51	1.22584	53014.2	0	53014.2	0	0	0	100	1
1755	Brazil	Goias	Catalao	GOIANDIRA	56135	1996	4	12.16	0	12.16	0	12.16	0	12.16	0	12.16	12.5	11.38	28999.3	1	12.5	11.38	1	28999.3	0	28999.3	0	0	0	100	1
1756	Brazil	Goias	Catalao	IPAMERI	437540	1996	4	3707.81	0	3707.81	0	3707.81	0	3707.81	0	3707.81	3117.43	2701.94	5.72901e+06	1	3117.43	2701.94	1.18938	6.81397e+06	0	6.81397e+06	0	0	0	100	1
1757	Brazil	Goias	Catalao	NOVA AURORA	30503.4	1996	4	27.54	0	27.54	0	27.54	0	27.54	0	27.54	27.25	25.59	66801.4	1	27.25	25.59	1.01064	67512.3	0	67512.3	0	0	0	100	1
1758	Brazil	Goias	Catalao	OUVIDOR	41277.4	1996	4	109.03	0	109.03	0	109.03	0	109.03	0	109.03	97.57	79.29	210250	1	97.57	79.29	1.11745	234945	0	234945	0	0	0	100	1
1759	Brazil	Goias	Catalao	TRES RANCHOS	28410.1	1996	4	20.21	0	20.21	0	20.21	0	20.21	0	20.21	22.64	19.92	55986.2	1	22.64	19.92	1	55986.2	0	55986.2	0	0	0	100	1
1760	Brazil	Goias	Ceres	BARRO ALTO	205152	1996	4	3420.27	0	3420.27	0	3420.27	0	3420.27	0	3420.27	1343.27	1205.04	3.47145e+06	1	1343.27	1205.04	2.54623	8.8391e+06	0	8.8391e+06	0	0	0	100	1
1761	Brazil	Goias	Ceres	CARMO DO RIO VERDE	59367.9	1996	4	692.89	0	692.89	0	692.89	0	692.89	0	692.89	495.13	443.38	1.28301e+06	1	495.13	443.38	1.39941	1.79546e+06	0	1.79546e+06	0	0	0	100	1
1762	Brazil	Goias	Ceres	CERES	45670.1	1996	4	753.81	0	753.81	0	753.81	0	753.81	0	753.81	611.39	574.65	1.50701e+06	1	611.39	574.65	1.23294	1.85807e+06	0	1.85807e+06	0	0	0	100	1
1763	Brazil	Goias	Ceres	GOIANESIA	142155	1996	4	10707.3	0	10707.3	0	10707.3	0	10707.3	0	10707.3	4356.98	4294.41	12962651	1	4356.98	4294.41	2.4575	3.18557e+07	0	3.18557e+07	0	0	0	100	1
1764	Brazil	Goias	Ceres	GUARAITA	20725.7	1996	4	0	0	0	0	0	0	0	0	0	0	0	0	1	0	0	1	0	0	0	0	-1	-1	-1	-1
1765	Brazil	Goias	Ceres	GUARINOS	59932.4	1996	4	0	0	0	0	0	0	0	0	0	0	0	0	1	0	0	1	0	0	0	0	-1	-1	-1	-1
1766	Brazil	Goias	Ceres	HIDROLINA	58064.2	1996	4	33.09	0	33.09	0	33.09	0	33.09	0	33.09	33.49	31.74	82862.4	1	33.49	31.74	1	82862.4	0	82862.4	0	0	0	100	1
1767	Brazil	Goias	Ceres	ITAPACI	95795.7	1996	4	1492.96	0	1492.96	0	1492.96	0	1492.96	0	1492.96	1264.65	1168.56	3.11961e+06	1	1264.65	1168.56	1.18053	3.6828e+06	0	3.6828e+06	0	0	0	100	1
1768	Brazil	Goias	Ceres	ITAPURANGA	127775	1996	4	317.52	0	317.52	0	317.52	0	317.52	0	317.52	330.19	298.44	890568	1	330.19	298.44	1	890568	0	890568	0	0	0	100	1
1769	Brazil	Goias	Ceres	MORRO AGUDO DE GOIAS	26713.2	1996	4	1.26	0	1.26	0	1.26	0	1.26	0	1.26	1.29	1.15	3229.33	1	1.29	1.15	1	3229.33	0	3229.33	0	0	0	100	1
1770	Brazil	Goias	Ceres	NOVA AMERICA	21438.6	1996	4	6.3	0	6.3	0	6.3	0	6.3	0	6.3	6.61	6.03	18516.4	1	6.61	6.03	1	18516.4	0	18516.4	0	0	0	100	1
1771	Brazil	Goias	Ceres	NOVA GLORIA	41447.1	1996	4	1484.1	0	1484.1	0	1484.1	0	1484.1	0	1484.1	1331.37	1271.91	3.37162e+06	1	1331.37	1271.91	1.11472	3.7584e+06	0	3.7584e+06	0	0	0	100	1
1772	Brazil	Goias	Ceres	PILAR DE GOIAS	92690.1	1996	4	18.91	0	18.91	0	18.91	0	18.91	0	18.91	20.05	18.16	51740	1	20.05	18.16	1	51740	0	51740	0	0	0	100	1
1773	Brazil	Goias	Ceres	RIALMA	26818	1996	4	733.19	0	733.19	0	733.19	0	733.19	0	733.19	496.36	471.33	1.04372e+06	1	496.36	471.33	1.47713	1.54172e+06	0	1.54172e+06	0	0	0	100	1
1774	Brazil	Goias	Ceres	RIANAPOLIS	15964.6	1996	4	170.18	0	170.18	0	170.18	0	170.18	0	170.18	146.13	138.41	187219	1	146.13	138.41	1.16458	218032	0	218032	0	0	0	100	1
1775	Brazil	Goias	Ceres	RUBIATABA	76828.1	1996	4	557.44	0	557.44	0	557.44	0	557.44	0	557.44	465.41	429.3	1.20422e+06	1	465.41	429.3	1.19774	1.44234e+06	0	1.44234e+06	0	0	0	100	1
1776	Brazil	Goias	Ceres	SANTA ISABEL	81052.2	1996	4	67.94	0	67.94	0	67.94	0	67.94	0	67.94	38.6	36.15	70744.8	1	38.6	36.15	1.7601	124518	0	124518	0	0	0	100	1
1777	Brazil	Goias	Ceres	SAO LUIZ DO NORTE	72949.6	1996	4	573.91	0	573.91	0	573.91	0	573.91	0	573.91	404.52	371.07	810358	1	404.52	371.07	1.41874	1.14969e+06	0	1.14969e+06	0	0	0	100	1
1778	Brazil	Goias	Ceres	URUANA	52269	1996	4	1188.97	0	1188.97	0	1188.97	0	1188.97	0	1188.97	1181.29	1087.18	2.1262e+06	1	1181.29	1087.18	1.0065	2.14002e+06	0	2.14002e+06	0	0	0	100	1
1779	Brazil	Goias	Chapada dos Veadeiros	ALTO PARAISO DE GOIAS	260097	1996	4	633.03	152.03	481	0	633.03	152.03	481	0	633.03	355.45	259.75	786812	1	355.45	259.75	1.78093	1.40125e+06	336529	1.06473e+06	0	24.0162	0.240162	75.9838	0.759838
1780	Brazil	Goias	Chapada dos Veadeiros	CAMPOS BELOS	78519.4	1996	4	79.92	73.61	6.31	0	79.92	73.61	6.31	0	79.92	56.09	51.26	203421	1	56.09	51.26	1.42485	289845	266961	22884.4	0	92.1046	0.921046	7.8954	0.078954
1781	Brazil	Goias	Chapada dos Veadeiros	CAVALCANTE	698421	1996	4	17.02	0	17.02	0	17.02	0	17.02	0	17.02	16.61	15.3	55466	1	16.61	15.3	1.02468	56835.1	0	56835.1	0	0	0	100	1
1782	Brazil	Goias	Chapada dos Veadeiros	COLINAS DO SUL	171526	1996	4	0	0	0	0	0	0	0	0	0	0	0	0	1	0	0	1	0	0	0	0	-1	-1	-1	-1
1783	Brazil	Goias	Chapada dos Veadeiros	MONTE ALEGRE DE GOIAS	313200	1996	4	146.32	73.26	73.06	0	146.32	73.26	73.06	0	146.32	103.7	98.4	338577	1	103.7	98.4	1.41099	477730	239191	238538	0	50.0683	0.500683	49.9317	0.499317
1784	Brazil	Goias	Chapada dos Veadeiros	NOVA ROMA	214361	1996	4	40.77	21.54	19.23	0	40.77	21.54	19.23	0	40.77	40.76	37.76	153554	1	40.76	37.76	1.00025	153591	81146.8	72444.4	0	52.833	0.52833	47.167	0.47167
1785	Brazil	Goias	Chapada dos Veadeiros	SAO JOAO D'ALIANCA	334057	1996	4	1266.3	576.3	690	0	1266.3	576.3	690	0	1266.3	882.25	596.64	2.05998e+06	1	882.25	596.64	1.43531	2.9567e+06	1.34561e+06	1.61109e+06	0	45.5105	0.455105	54.4895	0.544895
1786	Brazil	Goias	Chapada dos Veadeiros	TERESINA DE GOIAS	77625.8	1996	4	0	0	0	0	0	0	0	0	0	0	0	0	1	0	0	1	0	0	0	0	-1	-1	-1	-1
1787	Brazil	Goias	Entorno de Brasilia	ABADIANIA	104550	1996	4	588.05	0	588.05	0	588.05	0	588.05	0	588.05	530.63	440.02	841026	1	530.63	440.02	1.10821	932035	0	932035	0	0	0	100	1
1788	Brazil	Goias	Entorno de Brasilia	AGUA FRIA DE GOIAS	203579	1996	4	282.64	0	282.64	0	282.64	0	282.64	0	282.64	296.75	237.34	689925	1	296.75	237.34	1	689925	0	689925	0	0	0	100	1
1789	Brazil	Goias	Entorno de Brasilia	ALEXANIA	85165.9	1996	4	698.88	2	696.88	0	698.88	2	696.88	0	698.88	580.08	474.48	1.39217e+06	1	580.08	474.48	1.2048	1.67729e+06	4799.94	1.67249e+06	0	0.2862	0.00286172	99.7138	0.997138
1790	Brazil	Goias	Entorno de Brasilia	CABECEIRAS	111592	1996	4	1048.33	1048.33	0	0	1048.33	1048.33	0	0	1048.33	902.1	578.47	1.91017e+06	1	902.1	578.47	1.1621	2.2198e+06	2.2198e+06	0	0	100	1	0	0
1791	Brazil	Goias	Entorno de Brasilia	CIDADE OCIDENTAL	38999.6	1996	4	97.98	0	97.98	0	97.98	0	97.98	0	98.71	102.22	86.54	203262	0.992605	101.46	85.9	1	201758	0	201758	0	0	0	100	1
1792	Brazil	Goias	Entorno de Brasilia	COCALZINHO DE GOIAS	179565	1996	4	42.71	0	42.71	0	42.71	0	42.71	0	42.71	43.38	40.35	116046	1	43.38	40.35	1	116046	0	116046	0	0	0	100	1
1793	Brazil	Goias	Entorno de Brasilia	CORUMBA DE GOIAS	106604	1996	4	77.16	0	77.16	0	77.16	0	77.16	0	77.16	82.35	71.56	194923	1	82.35	71.56	1	194923	0	194923	0	0	0	100	1
1794	Brazil	Goias	Entorno de Brasilia	CRISTALINA	619324	1996	4	4273.72	0	4273.72	0	4273.72	0	4273.72	0	4276.09	5103.35	3868.29	9821934	0.999446	5100.52	3866.15	1	9.81649e+06	0	9.81649e+06	0	0	0	100	1
1795	Brazil	Goias	Entorno de Brasilia	FORMOSA	583285	1996	4	2440.2	2256.63	183.57	0	2440.2	2256.63	183.57	0	2440.27	1125.98	841.15	2148319	0.999971	1125.95	841.13	2.16724	4.65578e+06	4.30554e+06	350243	0	92.4773	0.924773	7.5227	0.0752274
1796	Brazil	Goias	Entorno de Brasilia	LUZIANIA	422607	1996	4	1952.31	0	1952.31	0	1952.31	0	1952.31	0	1952.66	1822.45	1331.53	3800237	0.999821	1822.12	1331.29	1.07145	4.07103e+06	0	4.07103e+06	0	0	0	100	1
1797	Brazil	Goias	Entorno de Brasilia	MIMOSO DE GOIAS	139249	1996	4	9.56	0	9.56	0	9.56	0	9.56	0	9.56	9.89	9.08	28640.6	1	9.89	9.08	1	28640.6	0	28640.6	0	0	0	100	1
1798	Brazil	Goias	Entorno de Brasilia	PADRE BERNARDO	314882	1996	4	156.4	2	154.4	0	156.4	2	154.4	0	156.46	130.6	125.67	304433	0.999617	130.55	125.62	1.19801	364574	4662.07	359912	0	1.2788	0.0127877	98.7212	0.987212
1799	Brazil	Goias	Entorno de Brasilia	PIRENOPOLIS	437578	1996	4	1210.59	0	1210.59	0	1210.59	0	1210.59	0	1210.59	402.72	376.87	974819	1	402.72	376.87	3.00603	2.93034e+06	0	2.93034e+06	0	0	0	100	1
1800	Brazil	Goias	Entorno de Brasilia	PLANALTINA	254576	1996	4	919.44	2	917.44	0	919.44	2	917.44	0	919.44	547.09	436.78	1.01418e+06	1	547.09	436.78	1.6806	1.70443e+06	3707.54	1.70072e+06	0	0.2175	0.00217524	99.7825	0.997825
1801	Brazil	Goias	Entorno de Brasilia	SANTO ANTONIO DO DESCOBERTO	113603	1996	4	163.99	0	163.99	0	163.99	0	163.99	0	164.24	112.92	94.36	237451	0.998478	112.75	94.22	1.45446	344837	0	344837	0	0	0	100	1
1802	Brazil	Goias	Entorno de Brasilia	VILA BOA	106517	1996	4	0	0	0	0	0	0	0	0	0	0	0	0	1	0	0	1	0	0	0	0	-1	-1	-1	-1
1803	Brazil	Goias	Goiania	APARECIDA DE GOIANIA	29036.8	1996	4	54.62	2	52.62	0	54.62	2	52.62	0	54.62	15.6	15.22	33718.9	1	15.6	15.22	3.50128	118059	4322.94	113737	0	3.6617	0.0366166	96.3383	0.963383
1804	Brazil	Goias	Goiania	ARAGOIANIA	23861	1996	4	59.33	0	59.33	0	59.33	0	59.33	0	59.33	42.24	39.3	75379.9	1	42.24	39.3	1.40459	105878	0	105878	0	0	0	100	1
1805	Brazil	Goias	Goiania	BELA VISTA DE GOIAS	128020	1996	4	793.12	4	789.12	0	793.12	4	789.12	0	793.12	497.63	458.69	623636	1	497.63	458.69	1.59379	993948	5012.85	988935	0	0.5043	0.00504337	99.4957	0.994957
1806	Brazil	Goias	Goiania	BONFINOPOLIS	12288.2	1996	4	184.17	0	184.17	0	184.17	0	184.17	0	184.17	115.99	104.2	172856	1	115.99	104.2	1.58781	274463	0	274463	0	0	0	100	1
1807	Brazil	Goias	Goiania	CALDAZINHA	31368.8	1996	4	66.29	0	66.29	0	66.29	0	66.29	0	66.29	52.33	44.24	79907.6	1	52.33	44.24	1.26677	101224	0	101224	0	0	0	100	1
1808	Brazil	Goias	Goiania	GOIANAPOLIS	16362	1996	4	480.88	0	480.88	0	480.88	0	480.88	0	480.88	205.99	200.96	339988	1	205.99	200.96	2.33448	793697	0	793697	0	0	0	100	1
1809	Brazil	Goias	Goiania	GOIANIA	78869.1	1996	4	2042.75	26	2016.75	0	2042.75	26	2016.75	0	2042.75	825.91	648.63	1.6511e+06	1	825.91	648.63	2.47333	4.08373e+06	51977.5	4.03175e+06	0	1.2728	0.0127279	98.7272	0.987272
1810	Brazil	Goias	Goiania	GOIANIRA	20086.6	1996	4	962.62	0	962.62	0	962.62	0	962.62	0	962.62	889.61	709.87	1.92576e+06	1	889.61	709.87	1.08207	2.0838e+06	0	2.0838e+06	0	0	0	100	1
1811	Brazil	Goias	Goiania	GUAPO	53355.4	1996	4	308.79	0	308.79	0	308.79	0	308.79	0	308.79	313.5	256.1	552860	1	313.5	256.1	1	552860	0	552860	0	0	0	100	1
1812	Brazil	Goias	Goiania	HIDROLANDIA	94713.5	1996	4	761.27	0	761.27	0	761.27	0	761.27	0	761.27	422.99	412.36	576347	1	422.99	412.36	1.79974	1.03727e+06	0	1.03727e+06	0	0	0	100	1
1813	Brazil	Goias	Goiania	LEOPOLDO DE BULHOES	49644.2	1996	4	1976.7	0	1976.7	0	1976.7	0	1976.7	0	1976.7	1303	1089.55	2.22498e+06	1	1303	1089.55	1.51704	3.37537e+06	0	3.37537e+06	0	0	0	100	1
1814	Brazil	Goias	Goiania	NEROPOLIS	20711.8	1996	4	1303.18	0	1303.18	0	1303.18	0	1303.18	0	1303.18	587.71	474.32	1.37451e+06	1	587.71	474.32	2.21739	3.04783e+06	0	3.04783e+06	0	0	0	100	1
1815	Brazil	Goias	Goiania	SANTO ANTONIO DE GOIAS	13264.7	1996	4	312.66	0	312.66	0	312.66	0	312.66	0	312.66	254.17	204.07	654472	1	254.17	204.07	1.23012	805080	0	805080	0	0	0	100	1
1816	Brazil	Goias	Goiania	SENADOR CANEDO	24525.6	1996	4	485.9	0	485.9	0	485.9	0	485.9	0	485.9	275.93	265.96	292862	1	275.93	265.96	1.76095	515716	0	515716	0	0	0	100	1
1817	Brazil	Goias	Goiania	TEREZOPOLIS DE GOIAS	10738.8	1996	4	392.33	0	392.33	0	392.33	0	392.33	0	392.33	133.6	129.84	249730	1	133.6	129.84	2.9366	733357	0	733357	0	0	0	100	1
1818	Brazil	Goias	Goiania	TRINDADE	78065.9	1996	4	875.36	0	875.36	0	875.36	0	875.36	0	875.36	638.17	523.4	1.04494e+06	1	638.17	523.4	1.37167	1.43331e+06	0	1.43331e+06	0	0	0	100	1
1819	Brazil	Goias	Ipora	AMORINOPOLIS	40973.8	1996	4	0	0	0	0	0	0	0	0	0	0	0	0	1	0	0	1	0	0	0	0	-1	-1	-1	-1
1820	Brazil	Goias	Ipora	CACHOEIRA DE GOIAS	41611.8	1996	4	1.58	0	1.58	0	1.58	0	1.58	0	1.58	0.17	0.16	336.28	1	0.17	0.16	9.29412	3125.43	0	3125.43	0	0	0	100	1
1821	Brazil	Goias	Ipora	CORREGO DO OURO	46330.8	1996	4	35.7	0	35.7	0	35.7	0	35.7	0	35.7	36.58	32.76	72928.7	1	36.58	32.76	1	72928.7	0	72928.7	0	0	0	100	1
1822	Brazil	Goias	Ipora	FAZENDA NOVA	128688	1996	4	80.32	0.77	79.55	0	80.32	0.77	79.55	0	80.32	85.25	73.75	167945	1	85.25	73.75	1	167945	1610.03	166335	0	0.9587	0.00958665	99.0413	0.990413
1823	Brazil	Goias	Ipora	IPORA	102971	1996	4	245.59	9.77	235.82	0	245.59	9.77	235.82	0	245.59	242.59	223.94	442241	1	242.59	223.94	1.01237	447710	17810.7	429899	0	3.9782	0.0397818	96.0218	0.960218
1824	Brazil	Goias	Ipora	ISRAELANDIA	57921.6	1996	4	49.5	0	49.5	0	49.5	0	49.5	0	49.5	46.22	41.66	93827.2	1	46.22	41.66	1.07096	100486	0	100486	0	0	0	100	1
1825	Brazil	Goias	Ipora	IVOLANDIA	126694	1996	4	29.16	1.15	28.01	0	29.16	1.15	28.01	0	29.16	24.87	22.67	43340.3	1	24.87	22.67	1.1725	50816.3	2004.07	48812.3	0	3.9438	0.0394376	96.0562	0.960562
1826	Brazil	Goias	Ipora	JAUPACI	52872.8	1996	4	5.8	0	5.8	0	5.8	0	5.8	0	5.8	5.99	5.35	11754.7	1	5.99	5.35	1	11754.7	0	11754.7	0	0	0	100	1
1827	Brazil	Goias	Ipora	MOIPORA	46022.2	1996	4	33.89	0	33.89	0	33.89	0	33.89	0	33.89	27.58	24.41	54228.4	1	27.58	24.41	1.22879	66635.3	0	66635.3	0	0	0	100	1
1828	Brazil	Goias	Ipora	NOVO BRASIL	65452	1996	4	6.3	0	6.3	0	6.3	0	6.3	0	6.3	6.48	5.75	14218.8	1	6.48	5.75	1	14218.8	0	14218.8	0	0	0	100	1
1829	Brazil	Goias	Meia Ponte	AGUA LIMPA	45394.3	1996	4	0	0	0	0	0	0	0	0	0	0	0	0	1	0	0	1	0	0	0	0	-1	-1	-1	-1
1830	Brazil	Goias	Meia Ponte	ALOANDIA	10320.2	1996	4	1.3	0.04	1.26	0	1.3	0.04	1.26	0	1.3	1.39	1.27	3504.64	1	1.39	1.27	1	3504.64	107.84	3396.8	0	3.0769	0.0307692	96.9231	0.969231
1831	Brazil	Goias	Meia Ponte	BOM JESUS DE GOIAS	141007	1996	4	1931.53	482.88	1448.65	0	1931.53	482.88	1448.65	0	1931.53	1934.55	1873.41	3.34671e+06	1	1934.55	1873.41	1	3.34671e+06	836672	2.51003e+06	0	24.9999	0.249999	75.0001	0.750001
1832	Brazil	Goias	Meia Ponte	BURITI ALEGRE	89934.2	1996	4	54.88	7.06	47.82	0	54.88	7.06	47.82	0	54.88	55.46	50.63	130190	1	55.46	50.63	1	130190	16748.1	113441	0	12.8644	0.128644	87.1356	0.871356
1833	Brazil	Goias	Meia Ponte	CACHOEIRA DOURADA	52371.5	1996	4	841.45	210.36	631.09	0	841.45	210.36	631.09	0	841.45	848.65	767.33	1.87328e+06	1	848.65	767.33	1	1.87328e+06	468315	1.40497e+06	0	24.9997	0.249997	75.0003	0.750003
1834	Brazil	Goias	Meia Ponte	CALDAS NOVAS	159701	1996	4	292.01	0	292.01	0	292.01	0	292.01	0	292.01	284.35	251.39	595732	1	284.35	251.39	1.02694	611780	0	611780	0	0	0	100	1
1835	Brazil	Goias	Meia Ponte	CROMINIA	36949.3	1996	4	352.85	0	352.85	0	352.85	0	352.85	0	352.85	273.23	245.03	355730	1	273.23	245.03	1.2914	459390	0	459390	0	0	0	100	1
1836	Brazil	Goias	Meia Ponte	GOIATUBA	308964	1996	4	1507.19	367.11	1140.08	0	1507.19	367.11	1140.08	0	1507.19	1276.91	1221.72	2.59638e+06	1	1276.91	1221.72	1.18034	3.06461e+06	746456	2.31816e+06	0	24.3572	0.243572	75.6428	0.756428
1837	Brazil	Goias	Meia Ponte	INACIOLANDIA	69260.7	1996	4	811.82	202.96	608.86	0	811.82	202.96	608.86	0	811.82	787.21	739.8	1.5082e+06	1	787.21	739.8	1.03126	1.55535e+06	388848	1.16651e+06	0	25.0006	0.250006	74.9994	0.749994
1838	Brazil	Goias	Meia Ponte	ITUMBIARA	246368	1996	4	2776.54	695.18	2081.36	0	2776.54	695.18	2081.36	0	2776.54	2618.94	2532.37	5.34126e+06	1	2618.94	2532.37	1.06018	5.66268e+06	1.4178e+06	4.24488e+06	0	25.0376	0.250376	74.9624	0.749624
1839	Brazil	Goias	Meia Ponte	JOVIANIA	45375.4	1996	4	628.18	119.67	508.51	0	628.18	119.67	508.51	0	628.18	679.76	615.68	1.27293e+06	1	679.76	615.68	1	1.27293e+06	242496	1.03043e+06	0	19.0503	0.190503	80.9497	0.809497
1840	Brazil	Goias	Meia Ponte	MAIRIPOTABA	46038.8	1996	4	73.75	0	73.75	0	73.75	0	73.75	0	73.75	74	64.72	130147	1	74	64.72	1	130147	0	130147	0	0	0	100	1
1841	Brazil	Goias	Meia Ponte	MARZAGAO	22775.9	1996	4	0	0	0	0	0	0	0	0	0	0	0	0	1	0	0	1	0	0	0	0	-1	-1	-1	-1
1842	Brazil	Goias	Meia Ponte	MORRINHOS	285298	1996	4	4449.01	164.07	4284.94	0	4449.01	164.07	4284.94	0	4449.01	3356.57	2694.73	6.75388e+06	1	3356.57	2694.73	1.32546	8.95202e+06	330131	8.62189e+06	0	3.6878	0.0368779	96.3122	0.963122
1843	Brazil	Goias	Meia Ponte	PANAMA	43404	1996	4	148.12	37.03	111.09	0	148.12	37.03	111.09	0	148.12	147.98	141.95	301157	1	147.98	141.95	1.00095	301442	75360.6	226082	0	25	0.25	75	0.75
1844	Brazil	Goias	Meia Ponte	PIRACANJUBA	245926	1996	4	2253.02	0	2253.02	0	2253.02	0	2253.02	0	2253.02	1604.13	1496.99	1.79719e+06	1	1604.13	1496.99	1.40451	2.52417e+06	0	2.52417e+06	0	0	0	100	1
1845	Brazil	Goias	Meia Ponte	PONTALINA	143818	1996	4	1563.89	26.59	1537.3	0	1563.89	26.59	1537.3	0	1563.89	1248.96	1052.79	2.37592e+06	1	1248.96	1052.79	1.25215	2.97501e+06	50582.6	2.92443e+06	0	1.7002	0.0170025	98.2998	0.982998
1846	Brazil	Goias	Meia Ponte	PROFESSOR JAMIL	34739.5	1996	4	15.76	0	15.76	0	15.76	0	15.76	0	15.76	16.06	14.26	27845.6	1	16.06	14.26	1	27845.6	0	27845.6	0	0	0	100	1
1847	Brazil	Goias	Meia Ponte	RIO QUENTE	25907.8	1996	4	13.93	0	13.93	0	13.93	0	13.93	0	13.93	11.7	9.84	21638.2	1	11.7	9.84	1.1906	25762.4	0	25762.4	0	0	0	100	1
1848	Brazil	Goias	Meia Ponte	VICENTINOPOLIS	73944.3	1996	4	4266.83	1008.7	3258.13	0	4266.83	1008.7	3258.13	0	4266.83	4183.27	3698.83	6.45455e+06	1	4183.27	3698.83	1.01997	6.58348e+06	1.55637e+06	5.02711e+06	0	23.6405	0.236405	76.3595	0.763595
1849	Brazil	Goias	Pires do Rio	CRISTIANOPOLIS	22481	1996	4	104	0	104	0	104	0	104	0	104	102.32	86.94	163575	1	102.32	86.94	1.01642	166260	0	166260	0	0	0	100	1
1850	Brazil	Goias	Pires do Rio	ORIZONA	197964	1996	4	222.4	0	222.4	0	222.4	0	222.4	0	222.4	253.82	213.79	573348	1	253.82	213.79	1	573348	0	573348	0	0	0	100	1
1851	Brazil	Goias	Pires do Rio	PALMELO	5765.31	1996	4	3.15	0	3.15	0	3.15	0	3.15	0	3.15	3.39	3.06	8173.88	1	3.39	3.06	1	8173.88	0	8173.88	0	0	0	100	1
1852	Brazil	Goias	Pires do Rio	PIRES DO RIO	107892	1996	4	12.87	0	12.87	0	12.87	0	12.87	0	12.87	13.93	12.46	35372	1	13.93	12.46	1	35372	0	35372	0	0	0	100	1
1853	Brazil	Goias	Pires do Rio	SANTA CRUZ DE GOIAS	106862	1996	4	3.83	0	3.83	0	3.83	0	3.83	0	3.83	3.92	3.55	9498.09	1	3.92	3.55	1	9498.09	0	9498.09	0	0	0	100	1
1854	Brazil	Goias	Pires do Rio	SAO MIGUEL DO PASSA QUATRO	54003.3	1996	4	383.37	0	383.37	0	383.37	0	383.37	0	383.37	372.85	286.59	673184	1	372.85	286.59	1.02822	692178	0	692178	0	0	0	100	1
1855	Brazil	Goias	Pires do Rio	SILVANIA	286630	1996	4	3772.92	0	3772.92	0	3772.92	0	3772.92	0	3772.92	3492.84	2699.2	6047326	1	3492.84	2699.2	1.08019	6.53224e+06	0	6.53224e+06	0	0	0	100	1
1856	Brazil	Goias	Pires do Rio	URUTAI	63053.2	1996	4	335.7	0	335.7	0	335.7	0	335.7	0	335.7	231.69	207.29	486425	1	231.69	207.29	1.44892	704791	0	704791	0	0	0	100	1
1857	Brazil	Goias	Pires do Rio	VIANOPOLIS	95649.8	1996	4	1014.78	0	1014.78	0	1014.78	0	1014.78	0	1014.78	1095.96	844.81	1.86163e+06	1	1095.96	844.81	1	1.86163e+06	0	1.86163e+06	0	0	0	100	1
1858	Brazil	Goias	Porangatu	ALTO HORIZONTE	50688.8	1996	4	0	0	0	0	0	0	0	0	0	0	0	0	1	0	0	1	0	0	0	0	-1	-1	-1	-1
1859	Brazil	Goias	Porangatu	CAMPINACU	197977	1996	4	0	0	0	0	0	0	0	0	0	0	0	0	1	0	0	1	0	0	0	0	-1	-1	-1	-1
1860	Brazil	Goias	Porangatu	CAMPINORTE	107136	1996	4	81.94	0	81.94	0	81.94	0	81.94	0	81.94	67.28	66.48	168799	1	67.28	66.48	1.2179	205580	0	205580	0	0	0	100	1
1861	Brazil	Goias	Porangatu	CAMPOS VERDES	44161.1	1996	4	10.78	0	10.78	0	10.78	0	10.78	0	10.78	11.05	10.44	27373.9	1	11.05	10.44	1	27373.9	0	27373.9	0	0	0	100	1
1862	Brazil	Goias	Porangatu	ESTRELA DO NORTE	30266.5	1996	4	37.57	0	37.57	0	37.57	0	37.57	0	37.57	24.4	24.4	61614.9	1	24.4	24.4	1.53975	94871.8	0	94871.8	0	0	0	100	1
1863	Brazil	Goias	Porangatu	FORMOSO	85069.6	1996	4	92.97	0	92.97	0	92.97	0	92.97	0	92.97	74.89	74.79	197381	1	74.89	74.79	1.24142	245033	0	245033	0	0	0	100	1
1864	Brazil	Goias	Porangatu	MARA ROSA	312805	1996	4	31.51	0	31.51	0	31.51	0	31.51	0	31.51	18.17	17.53	51448.7	1	18.17	17.53	1.73418	89221.1	0	89221.1	0	0	0	100	1
1865	Brazil	Goias	Porangatu	MINACU	287080	1996	4	123.91	0	123.91	0	123.91	0	123.91	0	123.91	116.58	104.52	314077	1	116.58	104.52	1.06288	333825	0	333825	0	0	0	100	1
1866	Brazil	Goias	Porangatu	MONTIVIDIU DO NORTE	133965	1996	4	22.06	2	20.06	0	22.06	2	20.06	0	22.06	20.31	20.15	74196.8	1	20.31	20.15	1.08616	80589.9	7306.43	73283.5	0	9.0662	0.0906618	90.9338	0.909338
1867	Brazil	Goias	Porangatu	MUTUNOPOLIS	86918.1	1996	4	15.76	0	15.76	0	15.76	0	15.76	0	15.76	13.07	13.07	34062	1	13.07	13.07	1.20581	41072.4	0	41072.4	0	0	0	100	1
1868	Brazil	Goias	Porangatu	NIQUELANDIA	987745	1996	4	1915.12	2	1913.12	0	1915.12	2	1913.12	0	1915.12	1337.79	1073.4	2.55681e+06	1	1337.79	1073.4	1.43156	3.66021e+06	3822.44	3.65639e+06	0	0.1044	0.00104432	99.8956	0.998956
1869	Brazil	Goias	Porangatu	NOVA IGUACU DE GOIAS	62965.1	1996	4	6.3	0	6.3	0	6.3	0	6.3	0	6.3	6.19	5.81	17030.2	1	6.19	5.81	1.01777	17332.8	0	17332.8	0	0	0	100	1
1870	Brazil	Goias	Porangatu	PORANGATU	647479	1996	4	176.11	0	176.11	0	176.11	0	176.11	0	176.11	114.16	114.16	281356	1	114.16	114.16	1.54266	434036	0	434036	0	0	0	100	1
1871	Brazil	Goias	Porangatu	SANTA TEREZA DE GOIAS	79660.5	1996	4	18.91	0	18.91	0	18.91	0	18.91	0	18.91	16.87	16.87	47203.5	1	16.87	16.87	1.12092	52911.6	0	52911.6	0	0	0	100	1
1872	Brazil	Goias	Porangatu	SANTA TEREZINHA DE GOIAS	119230	1996	4	128.26	0	128.26	0	128.26	0	128.26	0	128.26	116.43	107.14	268379	1	116.43	107.14	1.10161	295648	0	295648	0	0	0	100	1
1873	Brazil	Goias	Porangatu	TROMBAS	80127.2	1996	4	108.31	0	108.31	0	108.31	0	108.31	0	108.31	79.28	78.87	185395	1	79.28	78.87	1.36617	253281	0	253281	0	0	0	100	1
1874	Brazil	Goias	Porangatu	URUACU	214700	1996	4	429.64	0	429.64	0	429.64	0	429.64	0	429.64	359.12	351.26	803594	1	359.12	351.26	1.19637	961395	0	961395	0	0	0	100	1
1875	Brazil	Goias	Quirinopolis	CACHOEIRA ALTA	165953	1996	4	12.61	6.3	6.31	0	12.61	6.3	6.31	0	12.61	13	11.68	31249.7	1	13	11.68	1	31249.7	15612.4	15637.2	0	49.9603	0.499603	50.0397	0.500397
1876	Brazil	Goias	Quirinopolis	CACU	226050	1996	4	0	0	0	0	0	0	0	0	0	0	0	0	1	0	0	1	0	0	0	0	-1	-1	-1	-1
1877	Brazil	Goias	Quirinopolis	GOUVELANDIA	83428.1	1996	4	0	0	0	0	0	0	0	0	0	0	0	0	1	0	0	1	0	0	0	0	-1	-1	-1	-1
1878	Brazil	Goias	Quirinopolis	ITAJA	255783	1996	4	1.59	0.8	0.79	0	1.59	0.8	0.79	0	1.59	1.65	1.55	4423.72	1	1.65	1.55	1	4423.72	2225.77	2197.95	0	50.3145	0.503145	49.6855	0.496855
1879	Brazil	Goias	Quirinopolis	ITARUMA	344311	1996	4	131.8	65.9	65.9	0	131.8	65.9	65.9	0	131.8	107.95	98.75	259956	1	107.95	98.75	1.22094	317390	158695	158695	0	50	0.5	50	0.5
1880	Brazil	Goias	Quirinopolis	PARANAIGUARA	115794	1996	4	8.67	3.99	4.68	0	8.67	3.99	4.68	0	8.67	9.41	8.43	23325.3	1	9.41	8.43	1	23325.3	10734.5	12590.8	0	46.0208	0.460208	53.9792	0.539792
1881	Brazil	Goias	Quirinopolis	QUIRINOPOLIS	379032	1996	4	139.06	58.39	80.67	0	139.06	58.39	80.67	0	139.06	150.96	135.38	363817	1	150.96	135.38	1	363817	152763	211054	0	41.9891	0.419891	58.0109	0.580109
1882	Brazil	Goias	Quirinopolis	SAO SIMAO	41373.5	1996	4	0	0	0	0	0	0	0	0	0	0	0	0	1	0	0	1	0	0	0	0	-1	-1	-1	-1
1883	Brazil	Goias	Rio Vermelho	ARAGUAPAZ	220092	1996	4	18.91	0	18.91	0	18.91	0	18.91	0	18.91	19.96	18.05	47110.9	1	19.96	18.05	1	47110.9	0	47110.9	0	0	0	100	1
1884	Brazil	Goias	Rio Vermelho	ARUANA	305801	1996	4	75.64	0	75.64	0	75.64	0	75.64	0	75.64	59.53	51.72	122641	1	59.53	51.72	1.27062	155831	0	155831	0	0	0	100	1
1885	Brazil	Goias	Rio Vermelho	BRITANIA	146437	1996	4	0	0	0	0	0	0	0	0	0	0	0	0	1	0	0	1	0	0	0	0	-1	-1	-1	-1
1886	Brazil	Goias	Rio Vermelho	FAINA	194981	1996	4	12.61	0	12.61	0	12.61	0	12.61	0	12.61	12.84	11.59	32281.7	1	12.84	11.59	1	32281.7	0	32281.7	0	0	0	100	1
1887	Brazil	Goias	Rio Vermelho	GOIAS	311856	1996	4	20.16	0	20.16	0	20.16	0	20.16	0	20.16	20.02	18.33	49757.6	1	20.02	18.33	1.00699	50105.6	0	50105.6	0	0	0	100	1
1888	Brazil	Goias	Rio Vermelho	ITAPIRAPUA	205239	1996	4	837.62	0	837.62	0	837.62	0	837.62	0	837.62	284.95	215.97	534559	1	284.95	215.97	2.93953	1.57135e+06	0	1.57135e+06	0	0	0	100	1
1889	Brazil	Goias	Rio Vermelho	JUSSARA	410812	1996	4	2546.87	265.73	2281.14	0	2546.87	265.73	2281.14	0	2546.87	1155.94	934.01	2.77939e+06	1	1155.94	934.01	2.20329	6.12379e+06	638932	5.48486e+06	0	10.4336	0.104336	89.5664	0.895664
1890	Brazil	Goias	Rio Vermelho	MATRINCHA	115501	1996	4	1278.93	0	1278.93	0	1278.93	0	1278.93	0	1278.93	624.94	445.89	1271748	1	624.94	445.89	2.04648	2.60261e+06	0	2.60261e+06	0	0	0	100	1
1891	Brazil	Goias	Rio Vermelho	SANTA FE DE GOIAS	116275	1996	4	157.57	20.52	137.05	0	157.57	20.52	137.05	0	157.57	153.25	129.96	332179	1	153.25	129.96	1.02819	341543	44478.4	297064	0	13.0228	0.130228	86.9772	0.869772
1892	Brazil	Goias	Sao Miguel do Araguaia	CRIXAS	467671	1996	4	120.75	0	120.75	0	120.75	0	120.75	0	120.75	119.94	112.9	294702	1	119.94	112.9	1.00675	296693	0	296693	0	0	0	100	1
1893	Brazil	Goias	Sao Miguel do Araguaia	MOZARLANDIA	173961	1996	4	312.02	0	312.02	0	312.02	0	312.02	0	312.02	237.26	175.8	469575	1	237.26	175.8	1.3151	617536	0	617536	0	0	0	100	1
1894	Brazil	Goias	Sao Miguel do Araguaia	MUNDO NOVO	215607	1996	4	0	0	0	0	0	0	0	0	0	0	0	0	1	0	0	1	0	0	0	0	-1	-1	-1	-1
1895	Brazil	Goias	Sao Miguel do Araguaia	NOVA CRIXAS	732591	1996	4	606.35	0	606.35	0	606.35	0	606.35	0	606.35	331.37	310.42	674814	1	331.37	310.42	1.82983	1.23479e+06	0	1.23479e+06	0	0	0	100	1
1896	Brazil	Goias	Sao Miguel do Araguaia	NOVO PLANALTO	125474	1996	4	0	0	0	0	0	0	0	0	0	0	0	0	1	0	0	1	0	0	0	0	-1	-1	-1	-1
1897	Brazil	Goias	Sao Miguel do Araguaia	SAO MIGUEL DO ARAGUAIA	616848	1996	4	394.37	0	394.37	0	394.37	0	394.37	0	394.37	227.83	225.25	320499	1	227.83	225.25	1.73098	554779	0	554779	0	0	0	100	1
1898	Brazil	Goias	Sao Miguel do Araguaia	UIRAPURU	115696	1996	4	9.45	0	9.45	0	9.45	0	9.45	0	9.45	9.27	9.03	26665.6	1	9.27	9.03	1.01942	27183.3	0	27183.3	0	0	0	100	1
1899	Brazil	Goias	Sudoeste de Goias	APARECIDA DO RIO DOCE	60431.4	1996	4	0	0	0	0	0	0	0	0	0	0	0	0	1	0	0	1	0	0	0	0	-1	-1	-1	-1
1900	Brazil	Goias	Sudoeste de Goias	APORE	290805	1996	4	273.48	135.9	137.58	0	273.48	135.9	137.58	0	273.48	128.71	120	253897	1	128.71	120	2.12478	539475	268080	271394	0	49.6928	0.496928	50.3072	0.503072
1901	Brazil	Goias	Sudoeste de Goias	CAIAPONIA	867590	1996	4	50.42	5.22	45.2	0	50.42	5.22	45.2	0	50.42	55.12	48.18	103860	1	55.12	48.18	1	103860	10752.6	93107	0	10.353	0.10353	89.647	0.89647
1902	Brazil	Goias	Sudoeste de Goias	CASTELANDIA	29744.4	1996	4	0	0	0	0	0	0	0	0	0	0	0	0	1	0	0	1	0	0	0	0	-1	-1	-1	-1
1903	Brazil	Goias	Sudoeste de Goias	CHAPADAO DO CEU	219439	1996	4	0	0	0	0	0	0	0	0	0	0	0	0	1	0	0	1	0	0	0	0	-1	-1	-1	-1
1904	Brazil	Goias	Sudoeste de Goias	DOVERLANDIA	322005	1996	4	12.61	1.66	10.95	0	12.61	1.66	10.95	0	12.61	13.26	12.1	28942.7	1	13.26	12.1	1	28942.7	3810.06	25132.7	0	13.1642	0.131642	86.8358	0.868358
1905	Brazil	Goias	Sudoeste de Goias	JATAI	719735	1996	4	205.07	69.3	135.77	0	205.07	69.3	135.77	0	205.07	233.36	195.18	400782	1	233.36	195.18	1	400782	135438	265345	0	33.7933	0.337933	66.2067	0.662067
1906	Brazil	Goias	Sudoeste de Goias	MAURILANDIA	39289.6	1996	4	982.08	293.39	688.69	0	982.08	293.39	688.69	0	982.08	961.7	872.12	2.10164e+06	1	961.7	872.12	1.02119	2.14618e+06	641157	1.50502e+06	0	29.8743	0.298743	70.1257	0.701257
1907	Brazil	Goias	Sudoeste de Goias	MINEIROS	908814	1996	4	410.23	122.31	287.92	0	410.23	122.31	287.92	0	410.23	391.92	349.21	628779	1	391.92	349.21	1.04672	658155	196229	461926	0	29.815	0.29815	70.185	0.70185
1908	Brazil	Goias	Sudoeste de Goias	MONTIVIDIU	188494	1996	4	335.74	45.54	290.2	0	335.74	45.54	290.2	0	335.74	419.41	332.62	596276	1	419.41	332.62	1	596276	80879.2	515396	0	13.5641	0.135641	86.4359	0.864359
1909	Brazil	Goias	Sudoeste de Goias	PALESTINA DE GOIAS	132552	1996	4	6.3	1.76	4.54	0	6.3	1.76	4.54	0	6.3	6.6	5.89	13749.2	1	6.6	5.89	1	13749.2	3841.06	9908.19	0	27.9365	0.279365	72.0635	0.720635
1910	Brazil	Goias	Sudoeste de Goias	PEROLANDIA	103165	1996	4	6.3	1.38	4.92	0	6.3	1.38	4.92	0	6.3	7.81	6.25	10475.9	1	7.81	6.25	1	10475.9	2294.71	8181.15	0	21.9048	0.219048	78.0952	0.780952
1911	Brazil	Goias	Sudoeste de Goias	PORTELANDIA	55294.9	1996	4	356.82	19.44	337.38	0	356.82	19.44	337.38	0	356.82	386.91	333.07	424229	1	386.91	333.07	1	424229	23112.5	401116	0	5.4481	0.0544813	94.5519	0.945519
1912	Brazil	Goias	Sudoeste de Goias	RIO VERDE	841837	1996	4	3653.92	1248.42	2405.5	0	3653.92	1248.42	2405.5	0	3653.92	3893.92	3186.72	6636486	1	3893.92	3186.72	1	6636486	2.26746e+06	4.36902e+06	0	34.1666	0.341666	65.8334	0.658334
1913	Brazil	Goias	Sudoeste de Goias	SANTA HELENA DE GOIAS	113124	1996	4	1427.81	409.34	1018.47	0	1427.81	409.34	1018.47	0	1427.81	1534.08	1411.53	3.03294e+06	1	1534.08	1411.53	1	3.03294e+06	869516	2.16342e+06	0	28.6691	0.286691	71.3309	0.713309
1914	Brazil	Goias	Sudoeste de Goias	SANTA RITA DO ARAGUAIA	136545	1996	4	0	0	0	0	0	0	0	0	0	0	0	0	1	0	0	1	0	0	0	0	-1	-1	-1	-1
1915	Brazil	Goias	Sudoeste de Goias	SANTO ANTONIO DA BARRA	45174.5	1996	4	359.27	89.82	269.45	0	359.27	89.82	269.45	0	359.27	380.56	317.15	779937	1	380.56	317.15	1	779937	194990	584947	0	25.0007	0.250007	74.9993	0.749993
1916	Brazil	Goias	Sudoeste de Goias	SERRANOPOLIS	555052	1996	4	0	0	0	0	0	0	0	0	0	0	0	0	1	0	0	1	0	0	0	0	-1	-1	-1	-1
1917	Brazil	Goias	Vale do Rio dos Bois	ACREUNA	157183	1996	4	3021.77	726.94	2294.83	0	3021.77	726.94	2294.83	0	3021.77	2939.29	2626.37	5.89099e+06	1	2939.29	2626.37	1.02806	6.0563e+06	1.45695e+06	4.59935e+06	0	24.0568	0.240568	75.9432	0.759432
1918	Brazil	Goias	Vale do Rio dos Bois	CAMPESTRE DE GOIAS	27557.4	1996	4	239.17	0	239.17	0	239.17	0	239.17	0	239.17	167.39	120.87	263876	1	167.39	120.87	1.42882	377031	0	377031	0	0	0	100	1
1919	Brazil	Goias	Vale do Rio dos Bois	CEZARINA	41707.1	1996	4	689.15	0	689.15	0	689.15	0	689.15	0	689.15	454.58	386.26	618272	1	454.58	386.26	1.51601	937309	0	937309	0	0	0	100	1
1920	Brazil	Goias	Vale do Rio dos Bois	EDEALINA	60422.2	1996	4	701.3	43.04	658.26	0	701.3	43.04	658.26	0	701.3	502.36	472.09	838495	1	502.36	472.09	1.39601	1.17055e+06	71838.6	1.09871e+06	0	6.1372	0.0613717	93.8628	0.938628
1921	Brazil	Goias	Vale do Rio dos Bois	EDEIA	146615	1996	4	529.52	69.48	460.04	0	529.52	69.48	460.04	0	529.52	499.33	487.83	922607	1	499.33	487.83	1.06046	978388	128377	850011	0	13.1213	0.131213	86.8787	0.868787
1922	Brazil	Goias	Vale do Rio dos Bois	INDIARA	96139.4	1996	4	1308.66	42.73	1265.93	0	1308.66	42.73	1265.93	0	1308.66	989.23	927.73	2.09474e+06	1	989.23	927.73	1.32291	2.77114e+06	90482.6	2.68066e+06	0	3.2652	0.0326517	96.7348	0.967348
1923	Brazil	Goias	Vale do Rio dos Bois	JANDAIA	86637.2	1996	4	7509.32	48.16	7461.16	0	7509.32	48.16	7461.16	0	7509.32	4604.85	4533.63	10017845	1	4604.85	4533.63	1.63074	1.63365e+07	104772	1.62317e+07	0	0.6413	0.00641336	99.3587	0.993587
1924	Brazil	Goias	Vale do Rio dos Bois	PALMEIRAS DE GOIAS	154421	1996	4	2957.28	2	2955.28	0	2957.28	2	2955.28	0	2957.28	2173.61	1657.98	3.46398e+06	1	2173.61	1657.98	1.36054	4.71287e+06	3187.3	4.70968e+06	0	0.0676	0.000676297	99.9324	0.999324
1925	Brazil	Goias	Vale do Rio dos Bois	PALMINOPOLIS	38836.8	1996	4	139.88	0	139.88	0	139.88	0	139.88	0	139.88	105.38	95.14	180765	1	105.38	95.14	1.32739	239945	0	239945	0	0	0	100	1
1926	Brazil	Goias	Vale do Rio dos Bois	PARAUNA	379052	1996	4	3662.08	516.71	3145.37	0	3662.08	516.71	3145.37	0	3662.08	2390.52	2339.54	3.30436e+06	1	2390.52	2339.54	1.53192	5.06201e+06	714237	4.34778e+06	0	14.1097	0.141097	85.8903	0.858903
1927	Brazil	Goias	Vale do Rio dos Bois	SAO JOAO DA PARAUNA	30584	1996	4	130.23	0	130.23	0	130.23	0	130.23	0	130.23	120.43	110.13	223096	1	120.43	110.13	1.08138	241251	0	241251	0	0	0	100	1
1928	Brazil	Goias	Vale do Rio dos Bois	TURVELANDIA	93874	1996	4	2009.7	502.43	1507.27	0	2009.7	502.43	1507.27	0	2009.7	1967.99	1815.69	4.00223e+06	1	1967.99	1815.69	1.02119	4.08705e+06	1.02177e+06	3.06528e+06	0	25.0002	0.250002	74.9998	0.749998
1929	Brazil	Goias	Vale do Rio dos Bois	VARJAO	51860.3	1996	4	118.66	0	118.66	0	118.66	0	118.66	0	118.66	101.1	96.14	149418	1	101.1	96.14	1.17369	175370	0	175370	0	0	0	100	1
1930	Brazil	Goias	Vao do Parana	ALVORADA DO NORTE	149844	1996	4	19.33	19.33	0	0	19.33	19.33	0	0	19.33	18.97	17.54	66544.5	1	18.97	17.54	1.01898	67807.3	67807.3	0	0	100	1	0	0
1931	Brazil	Goias	Vao do Parana	BURITINOPOLIS	26865.2	1996	4	12.61	12.61	0	0	12.61	12.61	0	0	12.61	4.78	4.35	19059.4	1	4.78	4.35	2.63808	50280.1	50280.1	0	0	100	1	0	0
1932	Brazil	Goias	Vao do Parana	DAMIANOPOLIS	41608.1	1996	4	22.78	22.78	0	0	22.78	22.78	0	0	22.78	5.51	5.17	23738.1	1	5.51	5.17	4.1343	98140.3	98140.3	0	0	100	1	0	0
1933	Brazil	Goias	Vao do Parana	DIVINOPOLIS DE GOIAS	83412.3	1996	4	245.82	245.82	0	0	245.82	245.82	0	0	245.82	165.61	155.7	521605	1	165.61	155.7	1.48433	774235	774235	0	0	100	1	0	0
1934	Brazil	Goias	Vao do Parana	FLORES DE GOIAS	372196	1996	4	1536.89	1536.89	0	0	1536.89	1536.89	0	0	1536.89	638.54	601.11	1.04733e+06	1	638.54	601.11	2.40688	2.52081e+06	2.52081e+06	0	0	100	1	0	0
1935	Brazil	Goias	Vao do Parana	GUARANI DE GOIAS	123205	1996	4	0	0	0	0	0	0	0	0	0	0	0	0	1	0	0	1	0	0	0	0	-1	-1	-1	-1
1936	Brazil	Goias	Vao do Parana	IACIARA	163044	1996	4	26.51	26.51	0	0	26.51	26.51	0	0	26.51	27.28	25.07	96112.4	1	27.28	25.07	1	96112.4	96112.4	0	0	100	1	0	0
1937	Brazil	Goias	Vao do Parana	MAMBAI	86578.1	1996	4	72.15	72.15	0	0	72.15	72.15	0	0	72.15	30.75	28.33	111029	1	30.75	28.33	2.34634	260512	260512	0	0	100	1	0	0
1938	Brazil	Goias	Vao do Parana	POSSE	195912	1996	4	5.21	5.21	0	0	5.21	5.21	0	0	5.21	5.28	4.9	20166	1	5.28	4.9	1	20166	20166	0	0	100	1	0	0
1939	Brazil	Goias	Vao do Parana	SAO DOMINGOS	330331	1996	4	85.09	85.09	0	0	85.09	85.09	0	0	85.09	80.24	73.39	263915	1	80.24	73.39	1.06044	279867	279867	0	0	100	1	0	0
1940	Brazil	Goias	Vao do Parana	SIMOLANDIA	34416.6	1996	4	5.63	5.63	0	0	5.63	5.63	0	0	5.63	5.96	5.52	21903.2	1	5.96	5.52	1	21903.2	21903.2	0	0	100	1	0	0
1941	Brazil	Goias	Vao do Parana	SITIO D'ABADIA	137112	1996	4	6.3	6.3	0	0	6.3	6.3	0	0	6.3	6	5.48	22510.6	1	6	5.48	1.05	23636.2	23636.2	0	0	100	1	0	0
1942	Brazil	Maranhao	Aglomeracao Urbana de Sao Luis	PACO DO LUMIAR	18515.9	1996	4	66.83	6.68	60.15	0	66.83	6.68	60.15	0	66.83	35.11	35.11	148988	1	35.11	35.11	1.90345	283590	28346.2	255244	0	9.9955	0.0999551	90.0045	0.900045
1943	Brazil	Maranhao	Aglomeracao Urbana de Sao Luis	SAO JOSE DE RIBAMAR	43333.3	1996	4	27.61	2.76	24.85	0	27.61	2.76	24.85	0	27.61	7.89	7.89	33581.4	1	7.89	7.89	3.49937	117514	11747.1	105767	0	9.9964	0.0999638	90.0036	0.900036
1944	Brazil	Maranhao	Aglomeracao Urbana de Sao Luis	SAO LUIS	82832.6	1996	4	159.54	15.95	143.59	0	159.54	15.95	143.59	0	159.54	53.03	53.03	247358	1	53.03	53.03	3.00849	744174	74398.7	669775	0	9.9975	0.0999749	90.0025	0.900025
1945	Brazil	Maranhao	Alto Mearim e Grajau	ARAME	306742	1996	4	8.08	0.81	7.27	0	8.08	0.81	7.27	0	8.08	5.65	5.65	24934.1	1	5.65	5.65	1.43009	35658	3574.63	32083.4	0	10.0248	0.100248	89.9752	0.899752
1946	Brazil	Maranhao	Alto Mearim e Grajau	BARRA DO CORDA	1.30998e+06	1996	4	2014.98	852.08	1162.9	0	2014.98	852.08	1162.9	0	2014.98	245.39	245.39	1.23394e+06	1	245.39	245.39	8.21134	1.01323e+07	4.28465e+06	5.8476e+06	0	42.2873	0.422873	57.7127	0.577127
1947	Brazil	Maranhao	Alto Mearim e Grajau	GRAJAU	1.39696e+06	1996	4	428.07	183.73	244.34	0	428.07	183.73	244.34	0	428.07	115.74	115.74	560430	1	115.74	115.74	3.69855	2.07278e+06	889648	1.18313e+06	0	42.9206	0.429206	57.0794	0.570794
1948	Brazil	Maranhao	Alto Mearim e Grajau	JOSELANDIA	68969.1	1996	4	716.13	491.02	225.11	0	716.13	491.02	225.11	0	716.13	398.61	398.61	2060940	1	398.61	398.61	1.79657	3.70262e+06	2.53873e+06	1.16389e+06	0	68.5658	0.685658	31.4342	0.314342
1949	Brazil	Maranhao	Alto Mearim e Grajau	SITIO NOVO	293215	1996	4	19.26	9.81	9.45	0	19.26	9.81	9.45	0	19.26	10.72	10.72	47826.4	1	10.72	10.72	1.79664	85926.9	43766.5	42160.4	0	50.9346	0.509346	49.0654	0.490654
1950	Brazil	Maranhao	Alto Mearim e Grajau	TUNTUM	423077	1996	4	15.52	8.67	6.85	0	15.52	8.67	6.85	0	15.52	13.41	13.41	92953.3	1	13.41	13.41	1.15735	107579	60097.3	47481.7	0	55.8634	0.558634	44.1366	0.441366
1951	Brazil	Maranhao	Baixada Maranhense	ANAJATUBA	113748	1996	4	0	0	0	0	0	0	0	0	0	0	0	0	1	0	0	1	0	0	0	0	-1	-1	-1	-1
1952	Brazil	Maranhao	Baixada Maranhense	ARARI	108683	1996	4	632.53	347.89	284.64	0	632.53	347.89	284.64	0	632.53	125.28	125.28	490090	1	125.28	125.28	5.04893	2.47443e+06	1.36093e+06	1.1135e+06	0	54.9998	0.549998	45.0002	0.450002
1953	Brazil	Maranhao	Baixada Maranhense	CAJARI	42055.9	1996	4	0	0	0	0	0	0	0	0	0	0	0	0	1	0	0	1	0	0	0	0	-1	-1	-1	-1
1954	Brazil	Maranhao	Baixada Maranhense	MATINHA	46658.6	1996	4	33.15	3.31	29.84	0	33.15	3.31	29.84	0	33.15	22.67	22.67	78552.7	1	22.67	22.67	1.46228	114866	11469.3	103397	0	9.9849	0.0998492	90.0151	0.900151
1955	Brazil	Maranhao	Baixada Maranhense	MONCAO	141705	1996	4	3.24	2.24	1	0	3.24	2.24	1	0	3.24	2.65	2.65	11684.4	1	2.65	2.65	1.22264	14285.8	9876.58	4409.19	0	69.1358	0.691358	30.8642	0.308642
1956	Brazil	Maranhao	Baixada Maranhense	PALMEIRANDIA	40235.4	1996	4	0	0	0	0	0	0	0	0	0	0	0	0	1	0	0	1	0	0	0	0	-1	-1	-1	-1
1957	Brazil	Maranhao	Baixada Maranhense	PENALVA	84319.1	1996	4	0	0	0	0	0	0	0	0	0	0	0	0	1	0	0	1	0	0	0	0	-1	-1	-1	-1
1958	Brazil	Maranhao	Baixada Maranhense	PERI MIRIM	37640.7	1996	4	14.37	11.14	3.23	0	14.37	11.14	3.23	0	14.37	12.06	12.06	47812.7	1	12.06	12.06	1.19154	56970.9	44165.3	12805.6	0	77.5226	0.775226	22.4774	0.224774
[truncated: 13,081 more rows]
