# Supplementary material for: Groundwater use for irrigation – a global inventory
Source: Copernicus journal article supplement (doi:10.5194/hess-14-1863-2010), 2010-10-12
Supplement: Supplementary file 3 [file hess-14-1863-2010-supplement.zip]

Archive with 7 entries (7 files):
- HESS_2010_159_Supplement_S1.doc
- HESS_2010_159_Supplement_S2.xls
- HESS_2010_159_Supplement_S3.doc
- HESS_2010_159_Supplement_S4.doc
- HESS_2010_159_Figure_3_highres.pdf
- HESS_2010_159_Figure_1_highres.pdf
- HESS_2010_159_Figure_2_highres.pdf
