# Supplementary material for: Groundwater use for irrigation – a global inventory
Source: Copernicus journal article supplement (doi:10.5194/hess-14-1863-2010), 2010-10-12
Supplement: Supplementary file 4 [file HESS_2010_159_Supplement_S4.doc]

Supplement S4: Acronyms used in this article

| Abbreviation | Meaning |
| --- | --- |
| AAI | Area actually irrigated |
| AAI_GW | Area actually irrigated with groundwater |
| AAI_NC | Area actually irrigated with non-conventional water sources |
| AAI_SW | Area actually irrigated from surface water sources |
| AEI | Area equipped for irrigation |
| AEI_GW | Area equipped for irrigation with groundwater |
| AEI_NC | Area equipped for irrigation with non-conventional water sources |
| AEI_SW | Area equipped for irrigation with surface water |
| AHI | Harvested area of irrigated crops |
| AWWD | Agricultural water withdrawals |
| FAO | Food and Agriculture Organization of the United Nations |
| GCWM | Global crop water model |
| GMIA | Global map of irrigation areas |
| ICWU | Irrigation consumptive water use |
| ICWU_GW | Irrigation consumptive water use of groundwater |
| ICWU_NC | Irrigation consumptive water use of non-conventional water sources |
| ICWU_SW | Irrigation consumptive water use of surface water |
| MIRCA2000 | Monthly irrigated and rainfed crop areas around year 2000 |
| WHYMAP | World-wide hydrogeological mapping and assessment programme |
