# Supplementary figures and images for: Groundwater use for irrigation – a global inventory
Source: Copernicus journal article supplement (doi:10.5194/hess-14-1863-2010), 2010-10-12

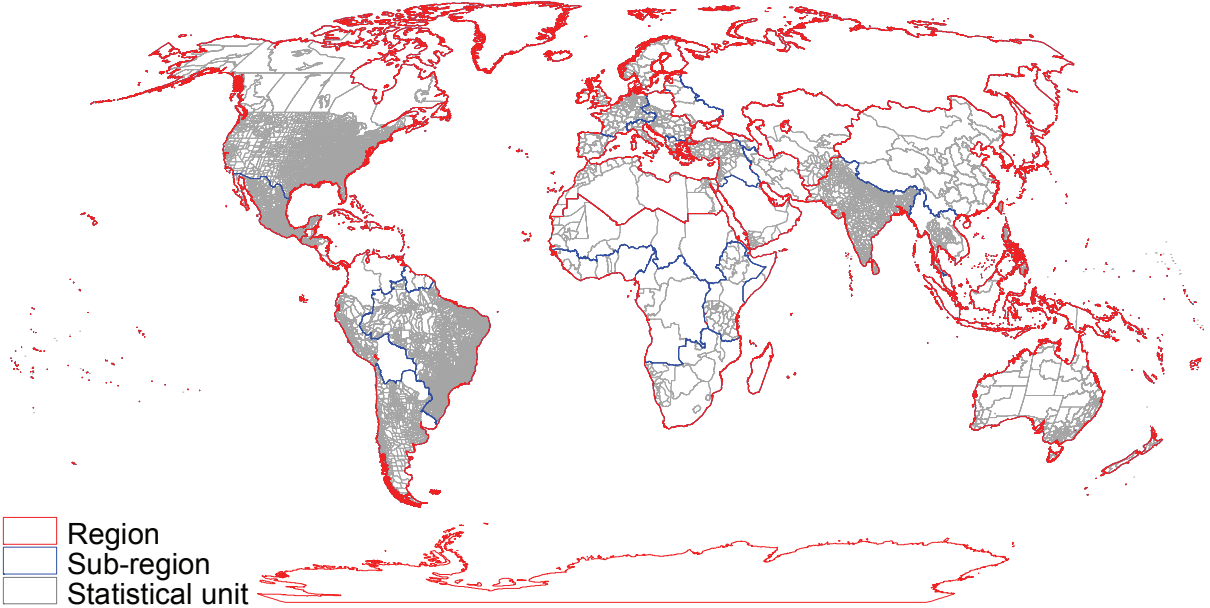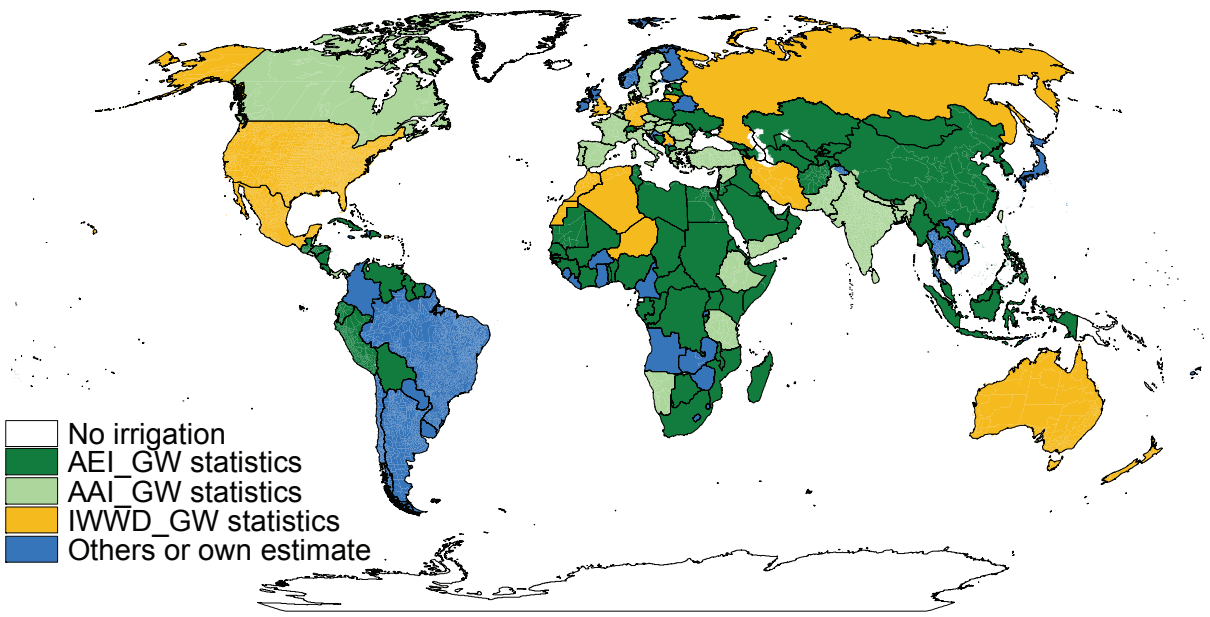

Supplement: Supplementary file 1 [file hess-14-1863-2010-supplement.zip]

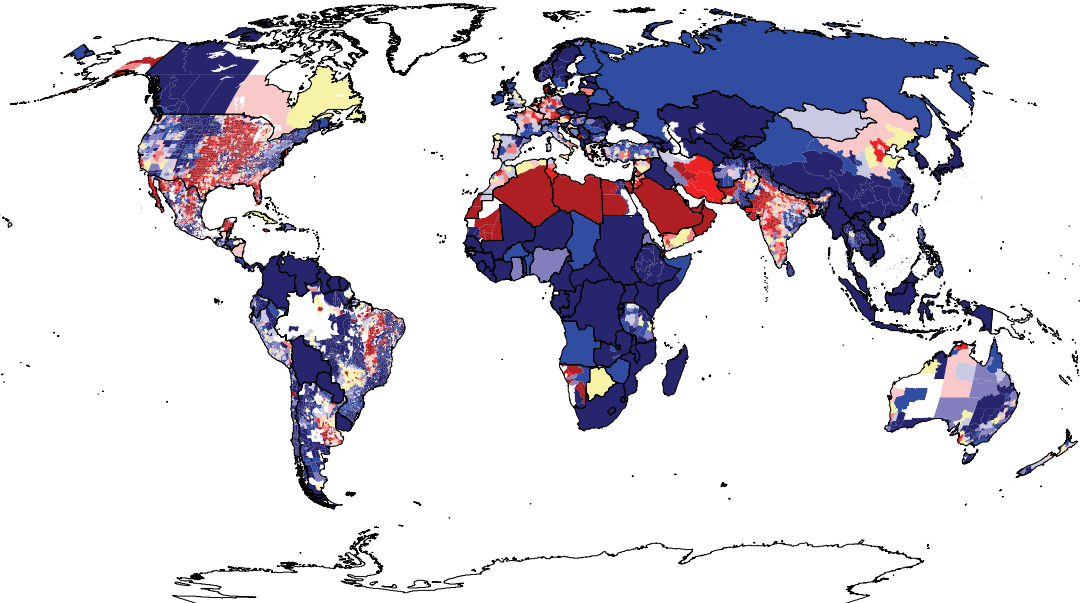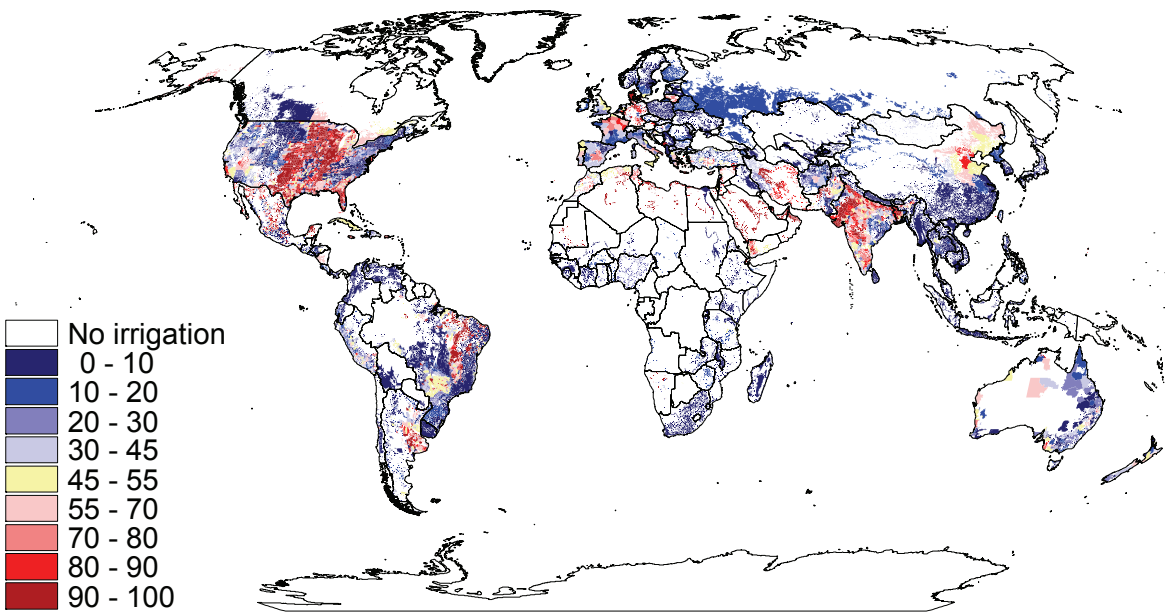

Supplement: Supplementary file 2 [file hess-14-1863-2010-supplement.zip]

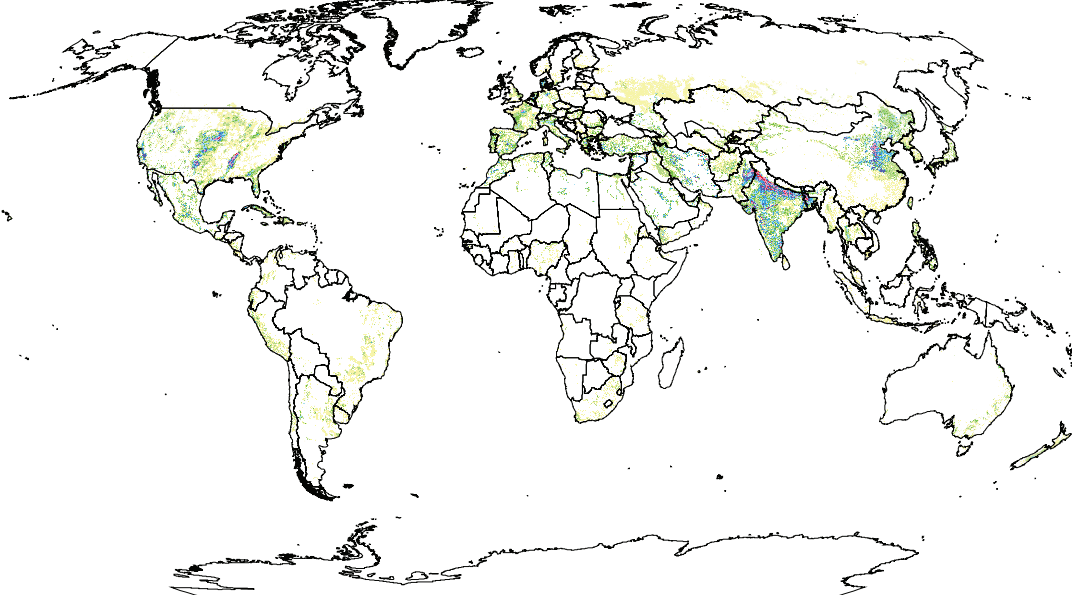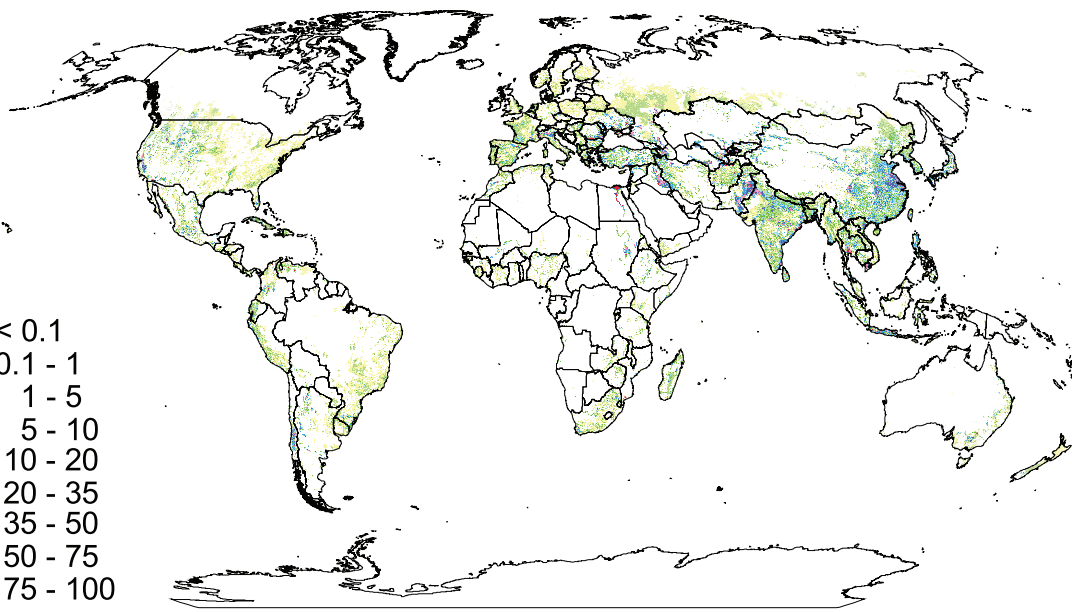

Supplement: Supplementary file 3 [file hess-14-1863-2010-supplement.zip › HESS_2010_159_Figure_3_highres.pdf]
